# Supplementary material for: Rapid priority setting exercise on faecal incontinence for Cochrane Incontinence
Source: PubMed Central journal article supplement — BMJ Open Gastroenterol. 2022 May 2;9(1):e000847. doi: 10.1136/bmjgast-2021-000847 (PMC9062784; doi:10.1136/bmjgast-2021-000847), 2022-05-02
Supplement: bmjgast-2021-000847supp001.pdf [file bmjgast-2021-000847supp001.pdf]

**Identifying key priorities for faecal incontinence  
research: results from a priority setting exercise by  
Cochrane Incontinence**

**Supplementary Appendices**

Katie Thomson, Nicole O'Connor, Donna Z. Bliss, Kim Dangova, Sheila Wallace, Sean Gill, Sara  
Jackson, Fiona Pearson

**Supplementary Appendix A: REPRISE guidelines**

| No       | Item                                                                      | Descriptor and/or examples                                                                                                                                               | Page No.                                                        |
|----------|---------------------------------------------------------------------------|--------------------------------------------------------------------------------------------------------------------------------------------------------------------------|-----------------------------------------------------------------|
| <b>A</b> | <b>Context and scope</b>                                                  |                                                                                                                                                                          |                                                                 |
| 1        | Define geographical scope                                                 | Global, regional, national, city, local area, institutional/organisational level, health service                                                                         | Background section (pg. 3)                                      |
| 2        | Define health area, field, focus                                          | Disease or condition specific, interventions, healthcare delivery, health system                                                                                         | Background section (pg. 3)                                      |
| 3        | Define end-users of research                                              | Intended beneficiaries e.g. general population or a specific population based on demographic (age, gender), clinical (disease, condition), or other characteristics      | Background section (pg. 3)                                      |
| 4        | Define the target audience of the priorities                              | Policy makers, funders, researchers, industry                                                                                                                            | Background section (pg. 3)                                      |
| 5        | Identify the broad research area                                          | Public health, health services research, clinical research, basic science                                                                                                | Background section (pg. 3)                                      |
| 6        | Identify the type of research question                                    | Etiology, diagnosis, prevention, treatment (interventions), prognosis, health services, psychosocial, behavioral and social science, economic evaluation, implementation | Background section (pg. 3)                                      |
| 7        | Define the time frame                                                     | Interim, short-term, long-term priorities, plans to revise and update                                                                                                    | Background section (pg. 3)                                      |
| <b>B</b> | <b>Governance and team</b>                                                |                                                                                                                                                                          |                                                                 |
| 8        | Describe selection of the leadership and management team                  | Those responsible for initiating, developing, and guiding the process for priority setting e.g. Steering Committee, Advisory Group, Technical Experts                    | Steering committee members listed in Acknowledgements           |
| 9        | Describe the characteristics of the team, and the networks they represent | Stakeholder groups, organisations or networks represented, characteristics (demographics, experience, expertise)                                                         | Survey responses (pg. 14) and Priorities from Workshop (pg. 17) |

|          |                                                                             |                                                                                                                                                                                                                    |                                                                                                             |
|----------|-----------------------------------------------------------------------------|--------------------------------------------------------------------------------------------------------------------------------------------------------------------------------------------------------------------|-------------------------------------------------------------------------------------------------------------|
| 10       | Describe any training or experience in priority setting                     | Consultants or advisors with experience in priority setting                                                                                                                                                        | Lynne Corner member of Steering Group (listed in Acknowledgements)                                          |
| <b>C</b> | <b>Framework for priority setting</b>                                       |                                                                                                                                                                                                                    |                                                                                                             |
| 11       | State the framework used (if any)                                           | James Lind Alliance, COHRED, CHNRI, no framework                                                                                                                                                                   | No framework used.                                                                                          |
| <b>D</b> | <b>Stakeholders or participants</b>                                         |                                                                                                                                                                                                                    |                                                                                                             |
| 12       | Define the inclusion criteria for stakeholders involved in priority-setting | Patients, caregivers, general community, health professionals, researchers, policy makers, non-governmental organisations, government, industry; specific groups including vulnerable and marginalized populations | Stakeholder survey (pg. 15)<br>Stakeholder workshop section (from pg. <b>Error! Bookmark not defined.</b> ) |
| 13       | State the strategy or method for identifying and engaging stakeholders      | Partnership with organizations, social media, recruitment through hospitals                                                                                                                                        | Stakeholder survey (pg. 15)<br>Stakeholder workshop section (from pg. <b>Error! Bookmark not defined.</b> ) |
| 14       | Indicate the number of participants and/or organisations involved           | Number of individuals and organisations, include number by stakeholder group                                                                                                                                       | Survey responses (pg. 14) and Priorities from Workshop (pg. 17)                                             |
| 15       | Describe the characteristics of stakeholders                                | Stakeholder group, demographic characteristics, areas of interest and expertise, discipline, affiliations                                                                                                          | Survey responses (pg. 14) and Priorities from Workshop (pg. 17)                                             |

|          |                                                                                           |                                                                                                                                                                                                                                                                              |                                                                                  |
|----------|-------------------------------------------------------------------------------------------|------------------------------------------------------------------------------------------------------------------------------------------------------------------------------------------------------------------------------------------------------------------------------|----------------------------------------------------------------------------------|
| 16       | State if reimbursement for participation was provided                                     | Cash, vouchers, certificates, acknowledgement; what purpose e.g. travel, accommodation, honorarium                                                                                                                                                                           | None given                                                                       |
| <b>E</b> | <b>Identification and collection of research priorities</b>                               |                                                                                                                                                                                                                                                                              |                                                                                  |
| 17       | Describe methods for collecting priorities from stakeholders                              | Methods e.g. Delphi survey, surveys, nominal group technique, interviews, focus groups, meetings, workshops; prioritization e.g. voting, ranking; mode e.g. face-to-face, online; may be informed by evidence e.g. systematic reviews, reviews of guidelines/other documents | Pgs. <b>Error! Bookmark not defined.</b> and <b>Error! Bookmark not defined.</b> |
| 18       | Describe methods for collating and categorizing priorities                                | Taxonomy or other framework used to organise, summarise, and aggregate topics or questions                                                                                                                                                                                   | See Methods section (pg. <b>Error! Bookmark not defined.</b> )                   |
| 19       | Describe methods and reasons for removing priorities                                      | Based on scope, clarity, definition, duplication, other criteria                                                                                                                                                                                                             | NA                                                                               |
| 20       | Describe methods for refining or translating priorities into research topics or questions | Reviewed by Steering Committee or project team                                                                                                                                                                                                                               | NA                                                                               |
| 21       | Describe methods for checking whether research questions or topics have been answered     | Systematic reviews, evidence mapping, consultation with experts                                                                                                                                                                                                              | Systematic review evidence – pg. 16                                              |
| 22       | Describe number of research questions or topics                                           | Number of priorities at each stage of the process                                                                                                                                                                                                                            | Tables 2-4                                                                       |
| <b>F</b> | <b>Prioritisation of research topics/questions</b>                                        |                                                                                                                                                                                                                                                                              |                                                                                  |
| 23       | Describe methods and criteria for prioritising research topics or questions               | Methods e.g. Delphi survey, surveys, nominal group technique, interviews, focus groups, meetings, workshops; prioritisation e.g. voting, ranking; mode e.g. face-to-face, online; criteria e.g. need, feasibility, novelty, equity                                           | Pg. 5                                                                            |

|          |                                                                                                                                       |                                                                              |                                |
|----------|---------------------------------------------------------------------------------------------------------------------------------------|------------------------------------------------------------------------------|--------------------------------|
| 24       | Provide reasons for excluding research topics/questions                                                                               | Thresholds for ranking scores, proportions, votes; other criteria            | NA                             |
| <b>G</b> | <b>Output</b>                                                                                                                         |                                                                              |                                |
| 25       | Specificity of research priorities are clear                                                                                          | Area, topic, questions, PICO (population, intervention, comparator, outcome) | NA                             |
| <b>H</b> | <b>Evaluation and feedback</b>                                                                                                        |                                                                              |                                |
| 26       | Describe how the process of prioritization was evaluated                                                                              | Survey, workshop                                                             | NA                             |
| 27       | Describe the approach for feeding back priorities to stakeholders and/or to the public; and how feedback was addressed and integrated | Public meetings or workshop, newsletters, website, email                     | NA                             |
| <b>I</b> | <b>Implementation</b>                                                                                                                 |                                                                              |                                |
| 28       | Outline the strategy or action plans for implementing priorities                                                                      | Communication with target audience, via policies and funding                 | NA                             |
| 29       | Describe evaluation of impact                                                                                                         | Integration in decision-making, funding allocation                           | NA                             |
| <b>J</b> | <b>Funding and conflict of interest</b>                                                                                               |                                                                              |                                |
| 30       | State sources of funding                                                                                                              | Name sources of funding for the priority-setting exercise                    | Listed in grant support (pg 1) |
| 31       | Outline the budget and/or cost                                                                                                        | Indicate budget and cost                                                     | Not reported                   |
| 32       | Provide declaration of conflict of interest                                                                                           | Statement of conflict of interest                                            | Pg. 1                          |

Tong A, Synnot A, Crowe S, Hill S, Matus S, Scholes-Robertson N, Oliver O, Cowan K, Nasser M, Bhaumik S, Gutman T, Baumgart A, Craig JC. Reporting Guideline for Priority Setting of Health Research (REPRISE). *BMC Med Res Methodol.* 2019;19(1):243.

## **Supplementary Appendix 2:** Search strategies to identify systematic reviews on FI and incontinence of flatus

Topic related search terms were used and combined with 'AND' with the search filters for identifying systematic reviews developed by CADTH (Strings attached: CADTH database search filters [Internet]. Ottawa: CADTH; 2016. [cited 2020 05 20]. Available from: [/resources/finding-evidence](#))

### **Faecal incontinence**

We searched:

The Database of Abstracts of Reviews of Effects (DARE) on the Centre for Reviews and Dissemination (CRD) [website](#) (covering from the earliest record in DARE up to and including 31 December 2014 when their coverage ended) on 28 July 2020.

As DARE is no longer actively updated we performed searches of the following databases to identify eligible systematic reviews (using the systematic review filters developed by CADTH<sup>5</sup>) within these databases from 1 January 2015 onwards:

- MEDLINE(R), covering 1 January 1946 to July Week 3 2020, MEDLINE(R) In-Process and Other Non-Indexed Citations, covering 1946 to 24 July 2020, Ovid MEDLINE(R) Daily Update (last updated 24 July 2020), MEDLINE(R) Epub Ahead of Print (last update on 24 July 2020) were searched on 28 July 2020 (all on Ovid);
- Embase (on Ovid), covering 1 January 1974 to 2020 Week 30, was searched on 28 July 2020;
- APA PsycINFO (on Ovid), covering 1 January 1806 to July Week 3 2020 was searched on 29 July 2020;
- CINAHL (on EBSCOhost), covering 1 January 1982 to 20200729 was searched on 29 July 2020;
- Cochrane Database of Systematic Reviews (CDSR), covering from inception to Issue 8, 2020 was searched on 19 August 2020;
- International HTA Database (INAHTA) available at <https://www.inahta.org/hta-database/>, covering from inception to 29 July 2020 was searched on 29 July 2020;
- KSR Evidence, available from <https://ksrevidence.com/> covering from 1 January 2015 to 28 July 2020 was searched on 28 July 2020.

The search strategies used in each database are given below.

### **Incontinence of flatus**

Additional supplemental searches for incontinence of flatus were performed in the following databases:

- DARE on the Centre for Reviews and Dissemination (CRD) [website](#) (covering from the earliest record in DARE up to and including 31 December 2014 when their coverage ended) was searched on 21 August 2020
- MEDLINE(R) and In-Process & Other Non-Indexed Citations covering 1946 to 17 August 2020, MEDLINE(R) Daily Update dated 17 August 2020, MEDLINE(R) Epub Ahead of Print dated 17 August 2020 were searched on 18 August 2020 (all on Ovid)
- Embase (on Ovid), covering 1 January 1974 to 2020 Week 33 was searched on 20 August 2020

- APA PsycINFO (on Ovid), covering 1 January 1806 to August Week 3 2020 was searched on 20 August 2020
- CINAHL (on EBSCOhost), covering 1 January 1982 to 20200820 was searched on 20 August 2020
- INAHTA, covering from inception to 21 August 2020 was searched on 21 August 2020

The search of CDSR included terms covering incontinence of flatus and so supplemental searches were not performed. Supplemental searches were not conducted in KSR Evidence as the free trial period was over.

## **DARE**

### **Faecal incontinence**

The **Database of Abstracts of Reviews of Effects** (DARE) on the Centre for Reviews and Dissemination (CRD) [website](#) (covering from the earliest record in DARE up to and including 31 December 2014 when their coverage ended) was searched on 28 July 2020 using the following search terms:

| Line | Search                                                                   |
|------|--------------------------------------------------------------------------|
| 1    | MeSH DESCRIPTOR fecal incontinence EXPLODE ALL TREES                     |
| 2    | MeSH DESCRIPTOR anal canal EXPLODE ALL TREES                             |
| 3    | MeSH DESCRIPTOR encopresis EXPLODE ALL TREES                             |
| 4    | MeSH DESCRIPTOR defecography EXPLODE ALL TREES                           |
| 5    | MeSH DESCRIPTOR Fecal Impaction EXPLODE ALL TREES                        |
| 6    | MeSH DESCRIPTOR Elimination Disorders EXPLODE ALL TREES                  |
| 7    | MeSH DESCRIPTOR Constipation EXPLODE ALL TREES                           |
| 8    | MeSH DESCRIPTOR Hirschsprung Disease EXPLODE ALL TREES                   |
| 9    | MeSH DESCRIPTOR megacolon EXPLODE ALL TREES                              |
| 10   | (defecation NEAR2 disorder*) OR (defaecation NEAR2 disorder*)            |
| 11   | (stool* NEAR25 incontinen* ) OR (stool* NEAR25 continen*) IN             |
| 12   | (fecal* NEAR25 incontinen* ) OR (fecal* NEAR25 continen*) IN             |
| 13   | (faecal* NEAR25 incontinen* ) OR (faecal* NEAR25 continen*)              |
| 14   | (faeces NEAR25 incontinen* ) OR (faeces* NEAR25 continen*)               |
| 15   | (feces NEAR25 incontinen* ) OR (feces* NEAR25 continen*)                 |
| 16   | (bowel* NEAR25 incontinen* ) OR (bowel* NEAR25 continen*)                |
| 17   | (anal NEAR25 incontinen* ) OR (anal NEAR25 continen*)                    |
| 18   | (anus NEAR25 incontinen* ) OR (anus NEAR25 continen*)                    |
| 19   | (encopre*)                                                               |
| 20   | (defaecograph*) OR (defecograph*)                                        |
| 21   | (impact* NEAR2 feces) OR (impact* NEAR2 faeces)                          |
| 22   | (impact* NEAR2 fecal) OR (impact* NEAR2 faecal) OR (impact* NEAR2 stool) |
| 23   | (pudend* NEAR2 neuropath*) OR (pudend* NEAR2 latenc*)                    |
| 24   | (megarectum*)                                                            |
| 25   | (leak* NEAR2 fecal) OR (leak* NEAR2 faecal) OR (leak* NEAR2 stool*)      |
| 26   | (leak* NEAR2 feces) OR (leak* NEAR2 faeces) OR (leak* NEAR2 motion*)     |
| 27   | (soil* NEAR2 feces) OR (soil* NEAR2 faeces)                              |
| 28   | (soil* NEAR2 fecal) OR (soil* NEAR2 faecal)                              |
| 29   | (postanal*)                                                              |

|    |                                                                                                                                                                                                                                                                                                                                                                                                                                                                          |
|----|--------------------------------------------------------------------------------------------------------------------------------------------------------------------------------------------------------------------------------------------------------------------------------------------------------------------------------------------------------------------------------------------------------------------------------------------------------------------------|
| 30 | (bowel* NEAR25 manag*)                                                                                                                                                                                                                                                                                                                                                                                                                                                   |
| 31 | (elimination disorder*)                                                                                                                                                                                                                                                                                                                                                                                                                                                  |
| 32 | (expulsion NEAR2 feces) OR (expulsion NEAR2 faeces)                                                                                                                                                                                                                                                                                                                                                                                                                      |
| 33 | (expulsion NEAR2 fecal) OR (expulsion NEAR2 faecal)                                                                                                                                                                                                                                                                                                                                                                                                                      |
| 34 | (expel* NEAR2 fecal) OR (expel* NEAR2 faecal)                                                                                                                                                                                                                                                                                                                                                                                                                            |
| 35 | (expel* NEAR2 feces) OR (expel* NEAR2 faeces)                                                                                                                                                                                                                                                                                                                                                                                                                            |
| 36 | (megacolon)                                                                                                                                                                                                                                                                                                                                                                                                                                                              |
| 37 | (retent* NEAR2 feces) OR (retent* NEAR2 faeces)                                                                                                                                                                                                                                                                                                                                                                                                                          |
| 38 | (retent* NEAR2 fecal) OR (retent* NEAR2 faecal)                                                                                                                                                                                                                                                                                                                                                                                                                          |
| 39 | (retain* NEAR2 fecal) OR (retain* NEAR2 faecal)                                                                                                                                                                                                                                                                                                                                                                                                                          |
| 40 | (retain* NEAR2 feces) OR (retain* NEAR2 faeces)                                                                                                                                                                                                                                                                                                                                                                                                                          |
| 41 | (retain* NEAR2 stool*) OR (retent* NEAR2 stool*)                                                                                                                                                                                                                                                                                                                                                                                                                         |
| 42 | (expel* NEAR2 stool*) OR (expulsion* NEAR2 stool*)                                                                                                                                                                                                                                                                                                                                                                                                                       |
| 43 | (anismus)                                                                                                                                                                                                                                                                                                                                                                                                                                                                |
| 44 | (urge* NEAR2 fecal) OR (urge* NEAR2 faecal) OR (urge* NEAR2 stool*)                                                                                                                                                                                                                                                                                                                                                                                                      |
| 45 | (frequen* NEAR2 fecal) OR (frequen* NEAR2 faecal) OR (frequen* NEAR2 stool*)                                                                                                                                                                                                                                                                                                                                                                                             |
| 46 | (frequen* NEAR2 feces) OR (frequen* NEAR2 faeces)                                                                                                                                                                                                                                                                                                                                                                                                                        |
| 47 | (urge* NEAR2 feces) OR (urge* NEAR2 faeces)                                                                                                                                                                                                                                                                                                                                                                                                                              |
| 48 | (spastic* NEAR2 bowel*) OR (spastic* NEAR2 colon*)                                                                                                                                                                                                                                                                                                                                                                                                                       |
| 49 | (sphincter NEAR2 hypotoni*)                                                                                                                                                                                                                                                                                                                                                                                                                                              |
| 50 | (evacuat* NEAR2 feces) OR (evacuat* NEAR2 faeces) OR (evacuat* NEAR2 stool*)                                                                                                                                                                                                                                                                                                                                                                                             |
| 51 | (evacuat* NEAR2 feces) OR (evacuat* NEAR2 faeces) OR (evacuat* NEAR2 stool*)                                                                                                                                                                                                                                                                                                                                                                                             |
| 52 | (evacuat* NEAR2 fecal) OR (evacuat* NEAR2 faecal) OR (evacuat* NEAR2 motion*)                                                                                                                                                                                                                                                                                                                                                                                            |
| 53 | (evacuat* NEAR2 bowel*)                                                                                                                                                                                                                                                                                                                                                                                                                                                  |
| 54 | (voluntary NEAR2 placement*) OR (abnormal NEAR2 placement*)                                                                                                                                                                                                                                                                                                                                                                                                              |
| 55 | (dyschezia) OR (obstipation) OR (soiling)                                                                                                                                                                                                                                                                                                                                                                                                                                |
| 56 | (pelvic NEAR2 dyssynerg*)                                                                                                                                                                                                                                                                                                                                                                                                                                                |
| 57 | (bowel* NEAR2 control*) OR (colonic NEAR2 aganglionosis) OR (colonic NEAR2 inertia)                                                                                                                                                                                                                                                                                                                                                                                      |
| 58 | (seep* NEAR feces) OR (seep* NEAR faeces)                                                                                                                                                                                                                                                                                                                                                                                                                                |
| 59 | (seep* NEAR fecal) OR (seep* NEAR faecal)                                                                                                                                                                                                                                                                                                                                                                                                                                |
| 60 | (loss* NEAR2 feces) OR (loss* NEAR2 faeces)                                                                                                                                                                                                                                                                                                                                                                                                                              |
| 61 | (loss* NEAR2 fecal) OR (loss* NEAR2 faecal)                                                                                                                                                                                                                                                                                                                                                                                                                              |
| 62 | (loss* NEAR2 stool*) OR (loss* NEAR2 motion*)                                                                                                                                                                                                                                                                                                                                                                                                                            |
| 63 | (seep* NEAR2 stool*) OR (seep* NEAR2 motion*)                                                                                                                                                                                                                                                                                                                                                                                                                            |
| 64 | (urge* NEAR2 defecat*) OR (urge* NEAR2 defaecat*)                                                                                                                                                                                                                                                                                                                                                                                                                        |
| 65 | (frequen* NEAR2 defecat*) OR (frequen* NEAR2 defaecat*)                                                                                                                                                                                                                                                                                                                                                                                                                  |
| 66 | (bowel NEAR2 program\$)                                                                                                                                                                                                                                                                                                                                                                                                                                                  |
| 67 | (neurogen* NEAR2 bowel*) OR (neuropath* NEAR2 bowel*)                                                                                                                                                                                                                                                                                                                                                                                                                    |
| 68 | #1 OR #2 OR #3 OR #4 OR #5 OR #6 OR #7 OR #8 OR #9 OR #10 OR #11 OR #12 OR #13 OR #14 OR #15 OR #16 OR #17 OR #18 OR #19 OR #20 OR #21 OR #22 OR #23 OR #24 OR #25 OR #26 OR #27 OR #28 OR #29 OR #30 OR #31 OR #32 OR #33 OR #34 OR #35 OR #36 OR #37 OR #38 OR #39 OR #40 OR #41 OR #42 OR #43 OR #44 OR #45 OR #46 OR #47 OR #48 OR #49 OR #50 OR #51 OR #52 OR #53 OR #54 OR #55 OR #56 OR #57 OR #58 OR #59 OR #60 OR #61 OR #62 OR #63 OR #64 OR #65 OR #66 OR #67 |
| 69 | (#68) IN DARE                                                                                                                                                                                                                                                                                                                                                                                                                                                            |

### Incontinence of flatus



**DARE** on the Centre for Reviews and Dissemination (CRD) [website](#) (covering from the earliest record in DARE up to and including 31 December 2014 when their coverage ended) was searched on 21 August 2020

((flatus or flatal) NEAR25 (incontinen\* or continen\*)) OR (((incontinen\* or continen\*) NEAR25 (flatus or flatal))) IN DARE

## **MEDLINE**

### **Faecal incontinence**

**MEDLINE**(R) (on Ovid), covering 1 January 1946 to July Week 3 2020; MEDLINE(R) InProcess and Other NonIndexed Citations, covering 1946 to 24 July 2020, Ovid MEDLINE(R) Daily Update (last updated 24 July 2020), MEDLINE(R) Epub Ahead of Print (last update on 24 July 2020) were searched on 28 July 2020 using the following terms:

| #  | Searches                                                                                                                                                              |
|----|-----------------------------------------------------------------------------------------------------------------------------------------------------------------------|
| 1  | meta-analysis.pt.                                                                                                                                                     |
| 2  | meta-analysis/ or systematic review/ or meta-analysis as topic/ or "meta analysis (topic)"/ or "systematic review (topic)"/ or exp technology assessment, biomedical/ |
| 3  | ((systematic* adj3 (review* or overview*)) or (methodologic* adj3 (review* or overview*))).ti,ab,kw.                                                                  |
| 4  | ((quantitative adj3 (review* or overview* or synthes*)) or (research adj3 (integrati* or overview*))).ti,ab,kw.                                                       |
| 5  | ((integrative adj3 (review* or overview*)) or (collaborative adj3 (review* or overview*)) or (pool* adj3 analy*)).ti,ab,kw.                                           |
| 6  | (data synthes* or data extraction* or data abstraction*).ti,ab,kw.                                                                                                    |
| 7  | (handsearch* or hand search*).ti,ab,kw.                                                                                                                               |
| 8  | (mantel haenszel or peto or der simonian or dersimonian or fixed effect* or latin square*).ti,ab,kw.                                                                  |
| 9  | (met analy* or metanaly* or technology assessment* or HTA or HTAs or technology overview* or technology appraisal*).ti,ab,kw.                                         |
| 10 | (meta regression* or metaregression*).ti,ab,kw.                                                                                                                       |
| 11 | (meta-analy* or metaanaly* or systematic review* or biomedical technology assessment* or bio-medical technology assessment*).mp,hw.                                   |
| 12 | (medline or cochrane or pubmed or medlars or embase or cinahl).ti,ab,hw.                                                                                              |
| 13 | (cochrane or (health adj2 technology assessment) or evidence report).jw.                                                                                              |
| 14 | (comparative adj3 (efficacy or effectiveness)).ti,ab,kw.                                                                                                              |
| 15 | (outcomes research or relative effectiveness).ti,ab,kw.                                                                                                               |
| 16 | ((indirect or indirect treatment or mixed-treatment) adj comparison*).ti,ab,kw.                                                                                       |
| 17 | or/1-16                                                                                                                                                               |
| 18 | (defecation adj2 disorder\$.tw.                                                                                                                                       |
| 19 | (defaecation adj2 disorder\$.tw.                                                                                                                                      |
| 20 | (stool\$ adj25 (incontinen\$ or continen\$)).tw.                                                                                                                      |
| 21 | fecal incontinence/                                                                                                                                                   |
| 22 | encopre\$.tw.                                                                                                                                                         |

|    |                                                                                                                          |
|----|--------------------------------------------------------------------------------------------------------------------------|
| 23 | encopresis/                                                                                                              |
| 24 | (leak\$ adj2 (fecal or faecal or feces or faeces or stool\$ or motion\$)).tw.                                            |
| 25 | (soil\$ adj2 (faeces or feces or fecal or faecal)).tw.                                                                   |
| 26 | (bowel\$ adj25 manag\$).tw.                                                                                              |
| 27 | ((fecal or faecal or feces or faeces or stool\$) adj2 (urge\$ or frequen\$)).tw.                                         |
| 28 | (sphincter adj2 hypotoni\$).tw.                                                                                          |
| 29 | soiling.tw.                                                                                                              |
| 30 | (bowel\$ adj2 control\$).tw.                                                                                             |
| 31 | (pelvic adj2 dyssynerg\$).tw.                                                                                            |
| 32 | ((feces or faeces or fecal or faecal) adj2 (seep\$ or leak\$ or loss)).tw.                                               |
| 33 | ((stool\$ or motion\$) adj2 (seep\$ or leak\$)).tw.                                                                      |
| 34 | ((defecat\$ or defaecat\$) adj2 (urge\$ or frequent\$)).tw.                                                              |
| 35 | (bowel adj2 program\$).tw.                                                                                               |
| 36 | ((neurogen\$ or neuropath\$) adj2 bowel\$).tw.                                                                           |
| 37 | ((fecal or faecal or feces or faeces or stool* or anal or anus or bowel or alvi) adj25 (incontinen\$ or continen\$)).tw. |
| 38 | or/18-37                                                                                                                 |
| 39 | 17 and 38                                                                                                                |

### Incontinence of flatus

**MEDLINE(R)** and In-Process & Other Non-Indexed Citations covering 1946 to 17 August 2020, MEDLINE(R) Daily Update dated 17 August 2020, MEDLINE(R) Epub Ahead of Print updated 17 August 2020 were searched on 18 August 2020 (all on Ovid) using the following terms combined with line 17 above using 'AND':

((flatus or flatal) adj25 (incontinen\$ or continen\$)).tw.

### Embase

#### Faecal incontinence

**Embase** (on Ovid), covering 1 January 1974 to 2020 Week 30, was searched on 28 July 2020 using the following search terms:

| # | Searches                                                                                                                                                                 |
|---|--------------------------------------------------------------------------------------------------------------------------------------------------------------------------|
| 1 | 1. meta-analysis.pt.                                                                                                                                                     |
| 2 | 2. meta-analysis/ or systematic review/ or meta-analysis as topic/ or "meta analysis (topic)"/ or "systematic review (topic)"/ or exp technology assessment, biomedical/ |
| 3 | 3. ((systematic* adj3 (review* or overview*)) or (methodologic* adj3 (review* or overview*))).ti,ab,kw.                                                                  |
| 4 | 4. ((quantitative adj3 (review* or overview* or synthes*)) or (research adj3 (integrati* or overview*))).ti,ab,kw.                                                       |
| 5 | 5. ((integrative adj3 (review* or overview*)) or (collaborative adj3 (review* or overview*)) or (pool* adj3 analy*)).ti,ab,kw.                                           |
| 6 | 6. (data synthes* or data extraction* or data abstraction*).ti,ab,kw.                                                                                                    |
| 7 | 7. (handsearch* or hand search*).ti,ab,kw.                                                                                                                               |

|    |                                                                                                                                         |
|----|-----------------------------------------------------------------------------------------------------------------------------------------|
| 8  | 8. (mantel haenszel or peto or der simonian or dersimonian or fixed effect* or latin square*).ti,ab,kw.                                 |
| 9  | 9. (met analy* or metanaly* or technology assessment* or HTA or HTAs or technology overview* or technology appraisal*).ti,ab,kw.        |
| 10 | 10. (meta regression* or metaregression*).ti,ab,kw.                                                                                     |
| 11 | 11. (meta-analy* or metaanaly* or systematic review* or biomedical technology assessment* or bio-medical technology assessment*).mp,hw. |
| 12 | 12. (medline or cochrane or pubmed or medlars or embase or cinahl).ti,ab,hw.                                                            |
| 13 | 13. (cochrane or (health adj2 technology assessment) or evidence report).jw.                                                            |
| 14 | 14. (comparative adj3 (efficacy or effectiveness)).ti,ab,kw.                                                                            |
| 15 | 15. (outcomes research or relative effectiveness).ti,ab,kw.                                                                             |
| 16 | 16. ((indirect or indirect treatment or mixed-treatment) adj comparison*).ti,ab,kw.                                                     |
| 17 | 17. or/1-16                                                                                                                             |
| 18 | 18. (defecation adj2 disorder\$).tw.                                                                                                    |
| 19 | 19. (defaecation adj2 disorder\$).tw.                                                                                                   |
| 20 | 20. (stool\$ adj25 (incontinen\$ or continen\$)).tw.                                                                                    |
| 21 | 21. fecal incontinence/                                                                                                                 |
| 22 | 22. encopre\$.tw.                                                                                                                       |
| 23 | 23. encopresis/                                                                                                                         |
| 24 | (leak\$ adj2 (fecal or faecal or feces or faeces or stool\$ or motion\$)).tw.                                                           |
| 25 | (soil\$ adj2 (faeces or feces or fecal or faecal)).tw.                                                                                  |
| 26 | (bowel\$ adj25 manag\$).tw.                                                                                                             |
| 27 | ((fecal or faecal or feces or faeces or stool\$) adj2 (urge\$ or frequen\$)).tw.                                                        |
| 28 | (sphincter adj2 hypotoni\$).tw.                                                                                                         |
| 29 | soiling.tw.                                                                                                                             |
| 30 | (bowel\$ adj2 control\$).tw.                                                                                                            |
| 31 | (pelvic adj2 dyssynerg\$).tw.                                                                                                           |
| 32 | ((feces or faeces or fecal or faecal) adj2 (seep\$ or leak\$ or loss)).tw.                                                              |
| 33 | ((stool\$ or motion\$) adj2 (seep\$ or leak\$)).tw.                                                                                     |
| 34 | ((defecat\$ or defaecat\$) adj2 (urge\$ or frequent\$)).tw.                                                                             |
| 35 | (bowel adj2 program\$).tw.                                                                                                              |
| 36 | ((neurogen\$ or neuropath\$) adj2 bowel\$).tw.                                                                                          |
| 37 | feces incontinence/                                                                                                                     |
| 38 | ((fecal or faecal or feces or faeces or stool* or anal or anus or bowel or alvi) adj25 (incontinen\$ or continen\$)).tw.                |
| 39 | defecation disorder/                                                                                                                    |
| 40 | defecation urgency/                                                                                                                     |
| 41 | or/18-40                                                                                                                                |
| 42 | 17 and 41                                                                                                                               |
| 43 | limit 42 to Embase                                                                                                                      |

### Incontinence of flatus

**Embase** (on Ovid), covering 1 January 1974 to 2020 Week 33 was searched on 20 August 2020 using the following terms

((flatus or flatal) adj25 (incontinen\$ or continen\$)).tw. which was combined with line 17 above and limited to 'Embase'.

#### **APA PsycINFO**

#### **Faecal incontinence**

**APA PsycINFO** (on Ovid), covering 1 January 1806 to July Week 3 2020 was searched on 29 July 2020 using the following search terms:

**Note on this search:** The CADTH terms .kw. and .kf. do not work – nor does .jw. (the equivalent is jx in PsycINFO). Although there is the .pt. field in PsycInfo there are few publication types and it does not include meta-analysis.pt. so have removed that. The CADTH filter does have the .md. field – methodology – they didn't have 'Metasynthesis' though – which could be useful so added that term to the search terms listed below. In the PsycINFO thesaurus fecal incontinence/ and the term encopresis/ are interchangeable – both have been kept in this search.

| #  | Searches                                                                                                                                                              |
|----|-----------------------------------------------------------------------------------------------------------------------------------------------------------------------|
| 1  | meta-analysis/ or systematic review/ or meta-analysis as topic/ or "meta analysis (topic)"/ or "systematic review (topic)"/ or exp technology assessment, biomedical/ |
| 2  | ((systematic* adj3 (review* or overview*)) or (methodologic* adj3 (review* or overview*))).ti,ab.                                                                     |
| 3  | ((quantitative adj3 (review* or overview* or synthes*)) or (research adj3 (integrati* or overview*))).ti,ab.                                                          |
| 4  | ((integrative adj3 (review* or overview*)) or (collaborative adj3 (review* or overview*)) or (pool* adj3 analy*)).ti,ab.                                              |
| 5  | (data synthes* or data extraction* or data abstraction*).ti,ab.                                                                                                       |
| 6  | (handsearch* or hand search*).ti,ab.                                                                                                                                  |
| 7  | (mantel haenszel or peto or der simonian or dersimonian or fixed effect* or latin square*).ti,ab.                                                                     |
| 8  | (met analy* or metanaly* or technology assessment* or HTA or HTAs or technology overview* or technology appraisal*).ti,ab.                                            |
| 9  | (meta regression* or metaregression*).ti,ab.                                                                                                                          |
| 10 | (meta-analy* or metaanaly* or systematic review* or biomedical technology assessment* or bio-medical technology assessment*).mp,hw.                                   |
| 11 | (medline or cochrane or pubmed or medlars or embase or cinahl).ti,ab,hw.                                                                                              |
| 12 | (cochrane or (health adj2 technology assessment) or evidence report).jx.                                                                                              |
| 13 | (comparative adj3 (efficacy or effectiveness)).ti,ab.                                                                                                                 |
| 14 | (outcomes research or relative effectiveness).ti,ab.                                                                                                                  |
| 15 | ((indirect or indirect treatment or mixed-treatment) adj comparison*).ti,ab.                                                                                          |
| 16 | (meta-analysis or systematic review or metasynthesis).md.                                                                                                             |
| 17 | or/1-16                                                                                                                                                               |
| 18 | (defecation adj2 disorder\$).tw.                                                                                                                                      |
| 19 | (defaecation adj2 disorder\$).tw.                                                                                                                                     |
| 20 | (stool\$ adj25 (incontinen\$ or continen\$)).tw.                                                                                                                      |
| 21 | fecal incontinence/                                                                                                                                                   |
| 22 | encopre\$.tw.                                                                                                                                                         |

|      |                                                                                                                          |
|------|--------------------------------------------------------------------------------------------------------------------------|
| 23   | encopresis/                                                                                                              |
| 2417 | (leak\$ adj2 (fecal or faecal or feces or faeces or stool\$ or motion\$)).tw.                                            |
| 25   | (soil\$ adj2 (faeces or feces or fecal or faecal)).tw.                                                                   |
| 26   | (bowel\$ adj25 manag\$).tw.                                                                                              |
| 27   | ((fecal or faecal or feces or faeces or stool\$) adj2 (urge\$ or frequen\$)).tw.                                         |
| 28   | (sphincter adj2 hypotoni\$).tw.                                                                                          |
| 29   | soiling.tw.                                                                                                              |
| 30   | (bowel\$ adj2 control\$).tw.                                                                                             |
| 31   | (pelvic adj2 dyssynerg\$).tw.                                                                                            |
| 32   | ((feces or faeces or fecal or faecal) adj2 (seep\$ or leak\$ or loss)).tw.                                               |
| 33   | ((stool\$ or motion\$) adj2 (seep\$ or leak\$)).tw.                                                                      |
| 34   | ((defecat\$ or defaecat\$) adj2 (urge\$ or frequent\$)).tw.                                                              |
| 35   | (bowel adj2 program\$).tw.                                                                                               |
| 36   | ((neurogen\$ or neuropath\$) adj2 bowel\$).tw.                                                                           |
| 37   | ((fecal or faecal or feces or faeces or stool* or anal or anus or bowel or alvi) adj25 (incontinen\$ or continen\$)).tw. |
| 38   | fecal incontinence/                                                                                                      |
| 39   | or/18-38                                                                                                                 |
| 40   | 17 and 39                                                                                                                |

### Incontinence of flatus

**APA PsycINFO** (on Ovid), covering 1 January 1806 to August Week 3 2020 was searched on 20 August 2020 using the following terms combined using 'AND' with line 17 above:  
 ((flatus or flatal) adj25 (incontinen\$ or continen\$)).tw.

### CINAHL

#### Faecal incontinence

**CINAHL** (on EBSCOhost), covering 1 January 1982 to 20200729 (and in process) was searched on 29 July 2020 using the following search terms. There was no CADTH filter for systematic reviews for use in CINAHL on EBSCOhost). Therefore the filter used in CINAHL was based on a search filter developed by the University of Texas School of Public Health which was then updated to include the CADTH textword terms:

University of Texas School of Public Health. [Search filters for systematic reviews and meta-analyses](#).

Accessed 29 July 2020. [EBSCOhost] (they had last updated in 2014 on **(8/8/2014)**)

Strings attached: CADTH database search filters [Internet]. Ottawa: CADTH; 2016. [cited yyyy mm dd]. Available from: [/resources/finding-evidence](#)

| #   | Query                                                                                                                                                                                                                                                                                                                                                                                                                                                                                |
|-----|--------------------------------------------------------------------------------------------------------------------------------------------------------------------------------------------------------------------------------------------------------------------------------------------------------------------------------------------------------------------------------------------------------------------------------------------------------------------------------------|
| S35 | S33 AND S34                                                                                                                                                                                                                                                                                                                                                                                                                                                                          |
| S34 | (TI ((indirect or indirect treatment or mixed-treatment) n2 comparison*)) or (AB ((indirect or indirect treatment or mixed-treatment) n2 comparison*)) or (TI (outcomes research or relative effectiveness)) or (AB (outcomes research or relative effectiveness)) or (TI (comparative n3 (efficacy or effectiveness))) or (AB (comparative n3 (efficacy or effectiveness))) or (TI (meta regression* or metaregression*)) or (AB (meta regression* or metaregression*)) or (TI (met |

|     |                                                                                                                                                                                                                                                                                                                                                                                                                                                                                                                                                                                                                                                                                                                                                                                                                                                                                                                                                                                                                                                                                                                                                                                                                                                                                                                                                                                                                                                                                                                                                                                                                                                                                                                                                                                                                                                                                                                                                                                                                                                                                                                                                                                                                                                                                                                                                                                                                                                                                                                                                                                                                                                                                                                                                                                                                       |
|-----|-----------------------------------------------------------------------------------------------------------------------------------------------------------------------------------------------------------------------------------------------------------------------------------------------------------------------------------------------------------------------------------------------------------------------------------------------------------------------------------------------------------------------------------------------------------------------------------------------------------------------------------------------------------------------------------------------------------------------------------------------------------------------------------------------------------------------------------------------------------------------------------------------------------------------------------------------------------------------------------------------------------------------------------------------------------------------------------------------------------------------------------------------------------------------------------------------------------------------------------------------------------------------------------------------------------------------------------------------------------------------------------------------------------------------------------------------------------------------------------------------------------------------------------------------------------------------------------------------------------------------------------------------------------------------------------------------------------------------------------------------------------------------------------------------------------------------------------------------------------------------------------------------------------------------------------------------------------------------------------------------------------------------------------------------------------------------------------------------------------------------------------------------------------------------------------------------------------------------------------------------------------------------------------------------------------------------------------------------------------------------------------------------------------------------------------------------------------------------------------------------------------------------------------------------------------------------------------------------------------------------------------------------------------------------------------------------------------------------------------------------------------------------------------------------------------------------|
|     | analy* or metanaly* or technology assessment* or HTA or HTAs or technology overview* or technology appraisal*) or (AB (met analy* or metanaly* or technology assessment* or HTA or HTAs or technology overview* or technology appraisal*)) or (TI (mantel haenszel or peto or der simonian or dersimonian or fixed effect* or latin square*)) or (AB (mantel haenszel or peto or der simonian or dersimonian or fixed effect* or latin square*)) or (TI (hand search*)) or (AB (hand search*)) or (TI (handsearch*)) or (AB (handsearch*)) or (TI (data n2 abstraction*)) or (AB (data n2 abstraction*)) or (TI (pool* n3 analy*)) or (AB (pool* n3 analy*)) or (TI (collaborative n3 review*)) or (AB (collaborative n3 review*)) or (TI (collaborative n3 overview*)) or (AB (collaborative n3 overview*)) or (TI (integrative n3 overview*)) or (AB (integrative n3 overview*)) or (TI (integrative n3 review*)) or (AB (integrative n3 review*)) or (TI (research n3 integrati*)) or (AB (research n3 integrati*)) or (TI (research n3 overview*)) or (AB (research n3 overview*)) or (TI (quantitative* n3 synthes*)) or (AB (quantitative* n3 synthes*)) or (TI (quantitative* n3 overview*)) or (AB (quantitative* n3 overview*)) or (TI (quantitative* n3 review*)) or (AB (quantitative* n3 review*)) or (TI (systematic* n3 review*)) or (AB (systematic* n3 review*)) or (TI (methodologic* n3 overview*)) or (AB (methodologic* n3 overview*)) or (TI (methodologic* n3 review*)) or (AB (methodologic* n3 review*)) or (TI (systematic* n3 overview*)) or (AB (systematic* n3 overview*)) or (TI (systematic* n3 bibliographic*)) or (AB (systematic* n3 bibliographic*)) or (TI (systematic* n3 literature)) or (AB (systematic* n3 literature)) or (TI (comprehensive* n3 literature)) or (AB (comprehensive* n3 literature)) or (TI (comprehensive* n3 bibliographic*)) or (AB (comprehensive* n3 bibliographic*)) or (TI (integrative n3 review)) or (AB (integrative n3 review)) or (JN "Cochrane Database of Systematic Reviews" or (health n2 technology assessment) or evidence report) or (TI (information n2 synthesis)) or (TI (data n2 synthesis)) or (AB (information n2 synthesis)) or (AB (data n2 synthesis)) or (TI (data n2 extract*)) or (AB (data n2 extract*)) or (TI (cochrane or medline or pubmed or medlars or psyclit or cinahl or (psycinfo not "psycinfo database") or "web of science" or scopus or embase)) or (AB (cochrane or medline or pubmed or medlars or psyclit or cinahl or (psycinfo not "psycinfo database") or "web of science" or scopus or embase)) or (MH "Systematic Review") or (MH "Meta Analysis") or (MH "Meta Synthesis") or (MH "Scoping Review") or (MH "Concept Analysis") or (TI (meta-analy* or metaanaly*)) or (AB (meta-analy* or metaanaly*)) |
| S33 | S1 OR S2 OR S3 OR S4 OR S5 OR S6 OR S7 OR S8 OR S9 OR S10 OR S11 OR S12 OR S13 OR S14 OR S15 OR S16 OR S17 OR S18 OR S19 OR S20 OR S21 OR S22 OR S23 OR S24 OR S25 OR S26 OR S27 OR S28 OR S29 OR S30 OR S31 OR S32                                                                                                                                                                                                                                                                                                                                                                                                                                                                                                                                                                                                                                                                                                                                                                                                                                                                                                                                                                                                                                                                                                                                                                                                                                                                                                                                                                                                                                                                                                                                                                                                                                                                                                                                                                                                                                                                                                                                                                                                                                                                                                                                                                                                                                                                                                                                                                                                                                                                                                                                                                                                   |
| S32 | AB neurogen* N2 bowel* OR neuropath* N2 bowel*                                                                                                                                                                                                                                                                                                                                                                                                                                                                                                                                                                                                                                                                                                                                                                                                                                                                                                                                                                                                                                                                                                                                                                                                                                                                                                                                                                                                                                                                                                                                                                                                                                                                                                                                                                                                                                                                                                                                                                                                                                                                                                                                                                                                                                                                                                                                                                                                                                                                                                                                                                                                                                                                                                                                                                        |
| S31 | TI neurogen* N2 bowel* OR neuropath* N2 bowel*                                                                                                                                                                                                                                                                                                                                                                                                                                                                                                                                                                                                                                                                                                                                                                                                                                                                                                                                                                                                                                                                                                                                                                                                                                                                                                                                                                                                                                                                                                                                                                                                                                                                                                                                                                                                                                                                                                                                                                                                                                                                                                                                                                                                                                                                                                                                                                                                                                                                                                                                                                                                                                                                                                                                                                        |
| S30 | AB defec* N2 urge* OR defaec* N2 urge* OR defec* N2 frequen* OR defaec* N2 frequen*                                                                                                                                                                                                                                                                                                                                                                                                                                                                                                                                                                                                                                                                                                                                                                                                                                                                                                                                                                                                                                                                                                                                                                                                                                                                                                                                                                                                                                                                                                                                                                                                                                                                                                                                                                                                                                                                                                                                                                                                                                                                                                                                                                                                                                                                                                                                                                                                                                                                                                                                                                                                                                                                                                                                   |
| S29 | TI defec* N2 urge* OR defaec* N2 urge* OR defec* N2 frequen* OR defaec* N2 frequen*                                                                                                                                                                                                                                                                                                                                                                                                                                                                                                                                                                                                                                                                                                                                                                                                                                                                                                                                                                                                                                                                                                                                                                                                                                                                                                                                                                                                                                                                                                                                                                                                                                                                                                                                                                                                                                                                                                                                                                                                                                                                                                                                                                                                                                                                                                                                                                                                                                                                                                                                                                                                                                                                                                                                   |
| S28 | AB stool* N2 seep* OR motion* N2 seep* OR stool* N2 loss*                                                                                                                                                                                                                                                                                                                                                                                                                                                                                                                                                                                                                                                                                                                                                                                                                                                                                                                                                                                                                                                                                                                                                                                                                                                                                                                                                                                                                                                                                                                                                                                                                                                                                                                                                                                                                                                                                                                                                                                                                                                                                                                                                                                                                                                                                                                                                                                                                                                                                                                                                                                                                                                                                                                                                             |
| S27 | TI stool* N2 seep* OR motion* N2 seep* OR stool* N2 loss*                                                                                                                                                                                                                                                                                                                                                                                                                                                                                                                                                                                                                                                                                                                                                                                                                                                                                                                                                                                                                                                                                                                                                                                                                                                                                                                                                                                                                                                                                                                                                                                                                                                                                                                                                                                                                                                                                                                                                                                                                                                                                                                                                                                                                                                                                                                                                                                                                                                                                                                                                                                                                                                                                                                                                             |
| S26 | AB fec* N2 seep* OR faec* N2 seep* OR fec* N2 loss* OR faec* N2 loss*                                                                                                                                                                                                                                                                                                                                                                                                                                                                                                                                                                                                                                                                                                                                                                                                                                                                                                                                                                                                                                                                                                                                                                                                                                                                                                                                                                                                                                                                                                                                                                                                                                                                                                                                                                                                                                                                                                                                                                                                                                                                                                                                                                                                                                                                                                                                                                                                                                                                                                                                                                                                                                                                                                                                                 |
| S25 | TI fec* N2 seep* OR faec* N2 seep* OR fec* N2 loss* OR faec* N2 loss*                                                                                                                                                                                                                                                                                                                                                                                                                                                                                                                                                                                                                                                                                                                                                                                                                                                                                                                                                                                                                                                                                                                                                                                                                                                                                                                                                                                                                                                                                                                                                                                                                                                                                                                                                                                                                                                                                                                                                                                                                                                                                                                                                                                                                                                                                                                                                                                                                                                                                                                                                                                                                                                                                                                                                 |
| S24 | AB bowel* N2 control*                                                                                                                                                                                                                                                                                                                                                                                                                                                                                                                                                                                                                                                                                                                                                                                                                                                                                                                                                                                                                                                                                                                                                                                                                                                                                                                                                                                                                                                                                                                                                                                                                                                                                                                                                                                                                                                                                                                                                                                                                                                                                                                                                                                                                                                                                                                                                                                                                                                                                                                                                                                                                                                                                                                                                                                                 |
| S23 | TI bowel* N2 control*                                                                                                                                                                                                                                                                                                                                                                                                                                                                                                                                                                                                                                                                                                                                                                                                                                                                                                                                                                                                                                                                                                                                                                                                                                                                                                                                                                                                                                                                                                                                                                                                                                                                                                                                                                                                                                                                                                                                                                                                                                                                                                                                                                                                                                                                                                                                                                                                                                                                                                                                                                                                                                                                                                                                                                                                 |
| S22 | AB fec* N2 urge* OR faec* N2 urge* OR fec* N2 frequen* OR faec* N2 frequen*                                                                                                                                                                                                                                                                                                                                                                                                                                                                                                                                                                                                                                                                                                                                                                                                                                                                                                                                                                                                                                                                                                                                                                                                                                                                                                                                                                                                                                                                                                                                                                                                                                                                                                                                                                                                                                                                                                                                                                                                                                                                                                                                                                                                                                                                                                                                                                                                                                                                                                                                                                                                                                                                                                                                           |
| S21 | TI fec* N2 urge* OR faec* N2 urge* OR fec* N2 frequen* OR faec* N2 frequen*                                                                                                                                                                                                                                                                                                                                                                                                                                                                                                                                                                                                                                                                                                                                                                                                                                                                                                                                                                                                                                                                                                                                                                                                                                                                                                                                                                                                                                                                                                                                                                                                                                                                                                                                                                                                                                                                                                                                                                                                                                                                                                                                                                                                                                                                                                                                                                                                                                                                                                                                                                                                                                                                                                                                           |
| S20 | AB soil* N25 faec* OR soil* N25 fec* OR soil* N25 stool* OR soil* N25 motion*                                                                                                                                                                                                                                                                                                                                                                                                                                                                                                                                                                                                                                                                                                                                                                                                                                                                                                                                                                                                                                                                                                                                                                                                                                                                                                                                                                                                                                                                                                                                                                                                                                                                                                                                                                                                                                                                                                                                                                                                                                                                                                                                                                                                                                                                                                                                                                                                                                                                                                                                                                                                                                                                                                                                         |
| S19 | TI soil* N25 faec* OR soil* N25 fec* OR soil* N25 stool* OR soil* N25 motion*                                                                                                                                                                                                                                                                                                                                                                                                                                                                                                                                                                                                                                                                                                                                                                                                                                                                                                                                                                                                                                                                                                                                                                                                                                                                                                                                                                                                                                                                                                                                                                                                                                                                                                                                                                                                                                                                                                                                                                                                                                                                                                                                                                                                                                                                                                                                                                                                                                                                                                                                                                                                                                                                                                                                         |
| S18 | AB leak* N25 faec* OR leak* N25 fec* OR leak* N25 stool* OR leak* N25 motion*                                                                                                                                                                                                                                                                                                                                                                                                                                                                                                                                                                                                                                                                                                                                                                                                                                                                                                                                                                                                                                                                                                                                                                                                                                                                                                                                                                                                                                                                                                                                                                                                                                                                                                                                                                                                                                                                                                                                                                                                                                                                                                                                                                                                                                                                                                                                                                                                                                                                                                                                                                                                                                                                                                                                         |

|     |                                                                                                         |
|-----|---------------------------------------------------------------------------------------------------------|
| S17 | TI leak* N25 faec* OR leak* N25 fec* OR leak* N25 stool* OR leak* N25 motion*                           |
| S16 | AB postanal N25 incontinen* OR postanal N25 continen* OR double N25 incontinen* OR double N25 continen* |
| S15 | TI postanal N25 incontinen* OR postanal N25 continen* OR double N25 incontinen* OR double N25 continen* |
| S14 | AB motion* N25 incontinen* OR motion* N25 continen* OR soil* N25 incontinen* OR soil* N25 continen*     |
| S13 | TI motion* N25 incontinen* OR motion* N25 continen* OR soil* N25 incontinen* OR soil* N25 continen*     |
| S12 | AB fec* N25 incontinen* OR fec* N25 continen* OR faec* N25 incontinen* OR faec* N25 continen*           |
| S11 | TI fec* N25 incontinen* OR fec* N25 continen* OR faec* N25 incontinen* OR faec* N25 continen*           |
| S10 | AB bowel N25 incontinen* OR bowel N25 continen* OR flatus N25 incontinen* OR flatus N25 continen*       |
| S9  | TI bowel N25 incontinen* OR bowel N25 continen* OR flatus N25 incontinen* OR flatus N25 continen*       |
| S8  | TI anal N25 incontinen* OR anal N25 continen* OR anus N25 incontinen* OR anus N25 continen*             |
| S7  | AB stool* N25 incontinen* OR stool* N25 continen*                                                       |
| S6  | TI stool* N25 incontinen* OR stool* N25 continen*                                                       |
| S5  | AB defaecation N2 disorder* OR defecation N2 disorder*                                                  |
| S4  | TI defaecation N2 disorder* OR defecation N2 disorder*                                                  |
| S3  | (MH "Feces, Impacted")                                                                                  |
| S2  | (MH "Altered Bowel Function (NANDA)+")                                                                  |
| S1  | (MH "Fecal Incontinence")                                                                               |

### Incontinence of flatus

**CINAHL** (on EBSCOhost), covering 1 January 1982 to 20200820 was searched on 20 August 2020 using the following search terms combined with line S34 above using 'AND':

TI ( ((flatus or flatal) n25 (incontinen\* or continen\*)) ) OR AB ( ((flatus or flatal) n25 (incontinen\* or continen\*)) )

### CDSR

#### Faecal incontinence

**Cochrane Database of Systematic Reviews (CDSR)**, covering from inception to Issue 8, 2020 was searched on 19 August 2020 using the following search terms:

| ID | Search                                                                         |
|----|--------------------------------------------------------------------------------|
| #1 | (defecation NEAR/2 disorder*):ti,ab                                            |
| #2 | (defaecation NEAR/2 disorder*):ti,ab                                           |
| #3 | (stool* NEAR/25 (incontinen* or continen*)):ti,ab                              |
| #4 | MeSH descriptor: [Fecal Incontinence] explode all trees                        |
| #5 | encopre*:ti,ab                                                                 |
| #6 | MeSH descriptor: [Encopresis] explode all trees                                |
| #7 | (leak* NEAR/2 (fecal or faecal or feces or faeces or stool* or motion*)):ti,ab |
| #8 | (soil* NEAR/2 (faeces or feces or fecal or faecal)):ti,ab                      |

- #9 (bowel\* NEAR/25 manag\*):ti,ab  
 #10 ((fecal or faecal or feces or faeces or stool\*) NEAR/2 (urge\* or frequen\*)):ti,ab  
 #11 (sphincter NEAR/2 hypotoni\*):ti,ab  
 #12 soiling:ti,ab  
 #13 (bowel\* NEAR/2 control\*):ti,ab  
 #14 (pelvic NEAR/2 dyssynerg\*):ti,ab  
 #15 ((feces or faeces or fecal or faecal) NEAR/2 (seep\* or leak\* or loss)):ti,ab  
 #16 ((stool\* or motion\*) NEAR/2 (seep\* or leak\*)):ti,ab  
 #17 ((defecat\* or defaecat\*) NEAR/2 (urge\* or frequent\*)):ti,ab  
 #18 (bowel NEAR/2 program\*):ti,ab  
 #19 ((neurogen\* or neuropath\*) NEAR/2 bowel\*):ti,ab  
 #20 ((fecal or faecal or feces or faeces or stool\* or anal or anus or bowel or alvi or bowel) NEAR/25 (incontinen\* or continen\*)):ti,ab  
 #21 ((flatus or flatal or wind) NEAR/25 (incontinen\* or continen\* or loss\*)):ti,ab  
 #22 #1 or #2 or #3 or #4 or #5 or #6 or #7 or #8 or #9 or #10 or #11 or #12 or #13 or #14 or #15 or #16 or #17 or #18 or #19 or #20 or #21

#### Incontinence of flatus

The search of CDSR included terms covering incontinence of flatus and so supplemental searches were not performed.

#### INAHTA

##### Faecal incontinence

**International HTA Database (INAHTA)** available at <https://www.inahta.org/hta-database/>, covering from inception to 29 July 2020 was searched on 29 July 2020 using the following search terms:

| Line | Query                                                                                                                            |
|------|----------------------------------------------------------------------------------------------------------------------------------|
| 14   | <u>#13 OR #12 OR #11 OR #10 OR #9 OR #8 OR #7 OR #6 OR #5 OR #4 OR #3 OR #2 OR #1</u>                                            |
| 13   | <u>(neurogen* or neuropath*) AND (incontinen* OR continen*)</u>                                                                  |
| 12   | <u>(neurogen* or neuropath*) AND bowel*</u>                                                                                      |
| 11   | <u>(fecal or faecal or feces or faeces) AND (loss* or losing or loses or lose)</u>                                               |
| 10   | <u>pelvi* AND dyssynerg*</u>                                                                                                     |
| 9    | <u>soiling</u>                                                                                                                   |
| 8    | <u>sphincter* AND hypotoni*</u>                                                                                                  |
| 7    | <u>(fecal or faecal or feces or faeces or stool*) AND (urge* or frequent*)</u>                                                   |
| 6    | <u>(fecal or faecal or feces or faeces or stool* or motion*) AND (leak* or soil* or seep*)</u>                                   |
| 5    | <u>encopre*</u>                                                                                                                  |
| 4    | <u>(fecal or faecal or feces or faeces or stool* or motion* or anal or anus or bowel or alvi) AND (incontinen* OR continen*)</u> |
| 3    | <u>(defecat* OR defaecat*) AND (disorder* or urge* or frequent*)</u>                                                             |
| 2    | <u>"Fecal Incontinence"[mhel]</u>                                                                                                |
| 1    | <u>"Encopresis"[mhel]</u>                                                                                                        |

#### Incontinence of flatus

**INAHTA**, covering from inception to 21 August 2020 was searched on 21 August 2020 testing the terms

((flatus or flatal) AND (incontinen\* or continen\*))



## **KSR Evidence**

### **Faecal incontinence**

**KSR Evidence** covering from 1 January 2015 to 28 July 2020 was searched on 28 July 2020 using the following search terms:

#### **# Query Results**

- 1 (defecat\* OR defaecat\*) AND (disorder\* or urge\* or frequent\*) in All text
- 2(fecal or faecal or feces or faeces or stool\* or motion\* or anal or anus or bowel or alvi) AND (incontinen\* OR continen\*) in All text
- 3 encopre\* in All text
- 4 (fecal or faecal or feces or faeces or stool\* or motion\*) AND (leak\* or soil\* or seep\*) in All text
- 5 (fecal or faecal or feces or faeces or stool\*) AND (urge\* or frequent\*) in All text
- 6 sphincter\* AND hypotoni\* in All text
- 7 soiling in All text
- 8 pelvi\* AND dyssynerg\* in All text
- 9 (fecal or faecal or feces or faeces) AND loss\* in All text
- 10 (neurogen\* or neuropath\*) AND bowel\* in All text
- 11 #1 or #2 or #3 or #4 or #5 or #6 or #7 or #8 or #9 or #10 in All text

### **Incontinence of flatus**

Supplemental searches were not conducted in KSR Evidence as the free trial period was over.

### **Supplementary Appendix 3:** Search terms for pipeline trials on FI

The following search terms were used in NIHR Innovation Observatory's 'ScanMedicine' database (<https://www.scanmedicine.io/>). The search was conducted in August 2020.

(fecal incontinence) OR (defecation disorder) OR (encopresis) OR (soiling) OR (stool incontinence) OR (incontinent of stools) OR (leaking faeces) OR (faecal leakage) OR (stool leakage) OR (leakage of motions) OR (faecal soiling) OR (faecal urgency) OR (stool urgency) OR (faecal frequency) OR (hypotonic sphincter) OR (hypotonic anal sphincter) OR (pelvic dyssynergia) OR (faecal leakage) OR (faecal seepage) OR (faecal loss) OR (stool seepage) OR (leaking stools) OR (seepage of motions) OR (leaking of motions) OR (urgent defaecation) OR (frequent defaecation) OR (neurogenic bowel) OR (faecal continence) OR (stool continence) OR (anal continence) OR (anus continence) OR (bowel continence) OR (alvi continence) OR (alvi incontinence) OR (defecation urgency) OR (incontinence of wind) OR (incontinence of flatus)

Note on search terms: the interface works with natural language terms. Alternative spellings, for example, 'faecal' or 'fecal' were not needed as the interface allowed for alternative spellings. The interface did not work with truncation or adjacency and instead mapped alternative endings and word orders.

#### The following search limits were applied:

Enrolment year  $\geq$  2015

Registries limited to: Brazil, Peru, USA, EU, AUSNZ, UK, India, Japan, South Korea, Thailand, and Sri Lanka

Trial recruitment status: excluding trials that were Suspended, Terminated, Withdrawn, or had an Unknown trial status

**Supplementary Appendix 4:** FI domains (including parent and child codes)**Bowel management**

General  
Assistive techniques  
Bowel habit/retraining  
Complementary therapies  
Dietary management  
Education  
Electrical stimulation  
Lifestyle  
Magnetic stimulation  
Pelvic floor muscle training/ biofeedback/ sphincter exercises  
Physiotherapy  
Psychological/ behavioural/ urgency suppression techniques  
Self-management  
Volumetric/breathing exercises  
Weight management

**Bowel management for neurological conditions**

Anticholinesterase plus an anticholinergic drug  
Assistive techniques  
Bowel programmes/ bowel care  
Devices  
Electrical stimulation  
Fibre  
Physiotherapy  
Surgery

**Bowel and bladder dysfunction**

Bladder pain syndrome  
Constipation (including in children)  
FI and delayed toilet training as a result of chronic constipation  
FI in children  
Link between constipation and urinary incontinence  
Urinary and/or FI

**Drugs**

General  
Anti-diarrhoeal agents  
Botulinum toxin type A  
Clonidine  
Drugs acting on anal sphincter tone  
Enemas  
Fibre  
Laxatives  
Oestrogen therapy

Pipeline drugs  
Repurposed drugs  
Stool-forming agents  
suppositories

**Surgery**

General

Antegrade irrigation  
Artificial anal sphincter  
Bariatric surgery  
Dynamic graciloplasty  
Gluteoplasty  
Injectable bulking agents  
levatorplasty (anterior) - repairing the pelvic floor  
Magnetic sphincter formation  
Microballoons  
Muscle transposition  
New surgical procedures  
Ostomies (colostomy and ileostomy)  
Post anal repair  
Posterior tibial nerve stimulation  
Radiofrequency  
Repair of posterior compartment prolapse  
Repair of rectal prolapse  
Sacral nerve stimulation (implanted)  
Slings  
Sphincteroplasty  
Sphincter repair  
Stem cells  
Total pelvic floor repair (TPFR)

**Models of care**

Clinical pathway to diagnosis  
Evidence-based practice  
General - models of care  
GP  
Nurse led  
Transition of care

**Mechanical devices**

Absorbent products  
Anal plugs  
Anal pouch  
Commodes  
Inserts (including vaginal inserts)  
Managing condition  
New devices (e.g. intra-rectal diversion devices)

Rectal catheters (used for critically-ill patients)

Rectal trumpet (off-label use)

Vaginal-bowel devices

**Other containment/ non-active/ other in non-neurogenic patients**

Toileting assistance programmes

Trans-anal irrigation

**Interventions in particular settings**

Acute care settings

Bowel management in low-resource settings

Improvements to physical environment

Products for odour and sounds

Toileting assistance programmes

Wireless technology monitoring wetness sensors - nursing home

**Interventions in particular populations**

Diabetes and FI

Management of FI for cancer patients

Post-menopausal women

Pregnant/post-partum women

**Other**

Compliance

Dermatitis

Diagnostic tools

Financial support

Mircobial transplant

Pressure sores

Psychological support

Qualitative research/ mixed methods/ lived experiences

Quality of life

Technology

Treatments that are not pharmaceuticals or naturopathic

Unsure

**Out of scope**

Disposal of products

Mechanisms and causes

Prevalence

Prevention of FI

**Supplementary Appendix 5: Inclusion/exclusion criteria**

Articles were excluded as 'wrong outcome' if they contained outcomes that didn't relate to FI.

Articles were excluded as 'out of CI scope' if they related to FI but were within the remit of another Cochrane group (e.g., Pregnancy and Childbirth).

| <b>Include</b>                                                                                                                                                                                                               | <b>Exclude</b>                                                                                                                                                      | <b>Reason for exclusion</b>                                                                                                                 |
|------------------------------------------------------------------------------------------------------------------------------------------------------------------------------------------------------------------------------|---------------------------------------------------------------------------------------------------------------------------------------------------------------------|---------------------------------------------------------------------------------------------------------------------------------------------|
| <b>Constipation</b> in elderly, children or neurogenic conditions, or any other population that cycles between constipation and FI                                                                                           | <b>Constipation</b> in adults, (without reference to cycling between constipation and FI), broad reviews, laxative prescribing or general reviews, during pregnancy | Constipation during pregnancy falls under the remit of Cochrane Pregnancy and Childbirth                                                    |
| <b>LARS</b> – with mention of treating the FI aspect of the syndrome that happens after LAR (keep as special batch) (LAR is covered by another group – they do not currently cover LARS but check with that Cochrane group?) | <b>LARS</b> – reconstruction techniques (anastomosis) or other surgeries and other alternative resection or re-joining of bowel.                                    | Covered by other Cochrane group(s)                                                                                                          |
| <b>Dermatitis</b> - Incontinence associated                                                                                                                                                                                  | <b>Dermatitis</b> - diaper wearing of infants or neonates                                                                                                           | Falls in the remit of another Cochrane Skin group                                                                                           |
| <b>Episiotomies</b> – treatment of long-term consequence if covers FI                                                                                                                                                        | <b>Episiotomies</b> – techniques and whether or not to do them                                                                                                      | Falls in the remit of another Cochrane group                                                                                                |
| <b>Repair of anal tears in the postpartum period is not included but</b> treatment of long-term consequences as regards FI are included                                                                                      | <b>Repair of anal tears postpartum</b>                                                                                                                              | Falls under the remit of a different Cochrane group unless it is treatment of long-term consequences or repair beyond the postpartum period |
| <b>Obesity</b> – weight loss to prevent/treat FI                                                                                                                                                                             | <b>Obesity</b>                                                                                                                                                      | This should be included if looking at weight loss to prevent or treat FI – if looking at other aspects of obesity not included              |
| Diagnosis – RCTs or diagnostic test accuracy                                                                                                                                                                                 | Aetiology of FI                                                                                                                                                     | Not within the scope of this project                                                                                                        |
| Guidelines (NICE) - If they include systematic review                                                                                                                                                                        | Economics                                                                                                                                                           | Outside the scope of this priority setting exercise                                                                                         |
| Recommendations - If they include systematic review                                                                                                                                                                          | Commentary type papers                                                                                                                                              | Not relevant                                                                                                                                |

|                                                                                                                                                 |                                                                                                                                           |                                                                                                 |
|-------------------------------------------------------------------------------------------------------------------------------------------------|-------------------------------------------------------------------------------------------------------------------------------------------|-------------------------------------------------------------------------------------------------|
|                                                                                                                                                 | Epidemiology – prevalence/incidence/burden of disease                                                                                     | Not within the scope of this project                                                            |
|                                                                                                                                                 | Comparative reviews looking at something else where FI is an outcome (e.g. surgery A vs Surgery B for rectal anal cancer or Radiotherapy) | The topics are covered by other Cochrane groups                                                 |
|                                                                                                                                                 | QoL where looking at measuring or development of the scales                                                                               | Not directly relevant                                                                           |
| Autism Spectrum Disorder (ASD) if related to prevention/treatment of FI in this population                                                      |                                                                                                                                           |                                                                                                 |
| Stroke - Include if looking at prevention or treatment of FI in stroke patients – if looking at other aspects of stroke then it is not included |                                                                                                                                           |                                                                                                 |
| Neurological conditions where the main focus seemed to be FI or related issues (spinal cord injury, multiple sclerosis)                         |                                                                                                                                           |                                                                                                 |
| Neurogenic bowel                                                                                                                                |                                                                                                                                           |                                                                                                 |
| Spinal cord injury - if looking at FI                                                                                                           |                                                                                                                                           |                                                                                                 |
| Multiple sclerosis - if looking at FI                                                                                                           |                                                                                                                                           |                                                                                                 |
| Cauda equine/tethered cord – if FI was one of the main topics                                                                                   |                                                                                                                                           |                                                                                                 |
| Cancer - If looking at longer term consequences of cancer treatment once cancer has resolved                                                    | Bowel prep surgery (e.g. for cancer treatment)                                                                                            | Covered by other Cochrane groups                                                                |
|                                                                                                                                                 | Screening for <b>cancers</b> – most commonly bowel cancer                                                                                 | Covered by other Cochrane groups                                                                |
|                                                                                                                                                 | Ovarian cancer                                                                                                                            | Covered by other Cochrane groups                                                                |
|                                                                                                                                                 | Prostate cancer                                                                                                                           | Covered by other Cochrane groups                                                                |
|                                                                                                                                                 | Anal or Rectal or bowel or colorectal cancer                                                                                              | Covered by other Cochrane groups                                                                |
| Pregnancy / Postpartum Complications that include FI or FI affecting sexual function                                                            | Comparing obstetric practices                                                                                                             | Covered by Cochrane Pregnancy and Childbirth group (we do cover prevention and treatment of FI) |

|                                                                                                                                                                                                 |                                                                         |                                                                                             |
|-------------------------------------------------------------------------------------------------------------------------------------------------------------------------------------------------|-------------------------------------------------------------------------|---------------------------------------------------------------------------------------------|
|                                                                                                                                                                                                 |                                                                         | using physical therapies pre/postpartum)                                                    |
| Rectovaginal fistula                                                                                                                                                                            | Obstetric anal sphincter injury (OASIS)                                 | Falls under the remit of Cochrane Pregnancy and Childbirth                                  |
|                                                                                                                                                                                                 | Crohn's disease, Diverticulitis, IBS/IBD, Ulcerative colitis, Diarrhoea | Covered by Cochrane Incontinence but different topic area or covered by Cochrane group(s)   |
|                                                                                                                                                                                                 | Haemorrhoids                                                            | Covered by another Cochrane group                                                           |
|                                                                                                                                                                                                 | Fistula in ano / anal fissure                                           | Covered by another Cochrane group                                                           |
|                                                                                                                                                                                                 | Pouches, colostomies, stomas or anastomoses                             | Covered by other Cochrane groups                                                            |
|                                                                                                                                                                                                 | Rectal prolapse/rectocele                                               | A different part of our scope                                                               |
|                                                                                                                                                                                                 | Anastomotic leakage or leakage related to stomas or colostomies,        | Covered by other Cochrane groups                                                            |
|                                                                                                                                                                                                 | Bladder surgery/neobladders/cystoplasty/Urinary diversion               | Not within the scope of this project – partly covered by another of our reviews             |
|                                                                                                                                                                                                 | Urinary incontinence (with no mention of FI or 'double incontinence')   | Covered by a different part of our group's scope                                            |
|                                                                                                                                                                                                 | Pelvic organ prolapse                                                   | Covered by a different part of our group's scope (includes posterior vaginal wall prolapse) |
| Frail elderly syndrome                                                                                                                                                                          | Congenital malformations                                                | Not within the scope of Cochrane Incontinence                                               |
| Lifestyle interventions – weight loss and other lifestyle interventions for prevent/treat FI                                                                                                    | Surgery to correct congenital defects and/or malformations              | Covered by other Cochrane groups                                                            |
| Pelvic floor exercises and other interventions to try to prevent and treat FI during and after pregnancy as well as longer term. We do cover long term effects of birth injuries as regards FI. | Hirschsprung's disease                                                  | Covered by another Cochrane group                                                           |
| Weight loss - treatment or prevention of FI                                                                                                                                                     |                                                                         |                                                                                             |
| Encopresis                                                                                                                                                                                      |                                                                         |                                                                                             |



|                                                                                                                                                                                                  |  |  |
|--------------------------------------------------------------------------------------------------------------------------------------------------------------------------------------------------|--|--|
| Specific mention of treatment, prevention, management, diagnostic test accuracy for, FI (with or without constipation) (with or without urinary incontinence) then it is a very definite include |  |  |
|--------------------------------------------------------------------------------------------------------------------------------------------------------------------------------------------------|--|--|

## Supplementary Appendix 6: Reasons for exclusion for review

Detailed below are full references for all excluded articles. Articles are excluded for one of the following reasons (in order of hierarchical importance as set out below):

|                                         |         |
|-----------------------------------------|---------|
| Wrong study design (n=181)              | 1-181   |
| Wrong outcomes (n=21)                   | 182-202 |
| Older version of Cochrane review (n=28) | 203-230 |
| Article unobtainable (n=20)             | 231-250 |
| Outside CI scope (n=57)                 | 251-307 |
| Duplicate (n=13)                        | 308-320 |
| Foreign language (n=12)                 | 321-332 |
| Wrong patient population (n=9)          | 333-341 |

### References

- Amend B, Khalil M, Kessler TM, Sievert KD. How does sacral modulation work best? Placement and programming techniques to maximize efficacy. *Curr Urol Rep.* 2011;12(5):327-35. Available from: <https://dx.doi.org/10.1007/s11934-011-0204-2>.
- Beeckman D. A decade of research on Incontinence-Associated Dermatitis (IAD): Evidence, knowledge gaps and next steps. *J Tissue Viability.* 2017;26(1):47-56. Available from: <https://dx.doi.org/10.1016/j.jtv.2016.02.004>.
- Beele H, Smet S, Van Damme N, Beeckman D. Incontinence-Associated Dermatitis: Pathogenesis, Contributing Factors, Prevention and Management Options. *Drugs and Aging.* 2018;35(1). Available from: <http://dx.doi.org/10.1007/s40266-017-0507-1>.
- Bharucha AE, Rao SSC, Shin AS. Surgical Interventions and the Use of Device-Aided Therapy for the Treatment of Fecal Incontinence and Defecatory Disorders. *Clin Gastroenterol Hepatol.* 2017;15(12):1844-54. Available from: <https://dx.doi.org/10.1016/j.cgh.2017.08.023>.
- Bittorf B, Matzel KE. The LARS Score for evaluation of low anterior resection syndrome. [German]. *Coloproctology.* 2015;37(4):262-5. Available from: <http://dx.doi.org/10.1007/s00053-015-0028-5>.
- Bliss DZ, Norton CA, Miller J, Krissovic M. Directions for future nursing research on fecal incontinence. *Nursing Research.* 2004;53(6S):S15-21. Available from.
- Cadeddu F, Sileri P, Grande M, De Luca E, Franceschilli L, Milito G. Focus on abdominal rectopexy for full-thickness rectal prolapse: meta-analysis of literature. *Tech Coloproctol.* 2012;16(1):37-53. Available from: <https://dx.doi.org/10.1007/s10151-011-0798-x>.
- Carrington EV, Knowles CH. The influence of sacral nerve stimulation on anorectal dysfunction. *Colorectal Dis.* 2011;13 Suppl 2:5-9. Available from: <https://dx.doi.org/10.1111/j.1463-1318.2010.02518.x>.
- Cave CE. Evidence-Based Continence Care: An Integrative Review. *Rehabil Nurs.* 2017;42(6):301-11. Available from: <https://dx.doi.org/10.1002/rnj.291>.
- Chatoor DR, Taylor SJ, Cohen CR, Emmanuel AV. Faecal incontinence. *Br J Surg.* 2007;94(2):134-44. Available from.
- Chiarioni G, Ferri B, Morelli A, Iantorno G, Bassotti G. Bio-feedback treatment of fecal incontinence: Where are we, and where are we going? *World Journal of Gastroenterology.* 2005;11(31):4771-5. Available from: <http://dx.doi.org/10.3748/wjg.v11.i31.4771>.
- Christensen P, Krogh K, Perrouin-Verbe B, Leder D, Bazzocchi G, Petersen Jakobsen B, et al. Global audit on bowel perforations related to transanal irrigation. *Tech Coloproctol.* 2016;20(2):109-15. Available from: <https://dx.doi.org/10.1007/s10151-015-1400-8>.
- Cook TA, Mortensen NJ. Management of faecal incontinence following obstetric injury. *Br J Surg.* 1998;85(3):293-9. Available from.
- Dewberry L, Trecartin A, Pena A, Pierre MS, Bischoff A. Systematic review: sacral nerve stimulation in the treatment of constipation and fecal incontinence in children with emphasis in anorectal malformation. *Pediatr Surg Int.* 2019;35(9):1009-12. Available from: <https://dx.doi.org/10.1007/s00383-019-04515-z>.
- Dorcaratto D, Martinez-Vilalta M, Pares D. Current indications, surgical technique and results of anterior sphincter repair as a treatment of faecal incontinence. *Cir Esp.* 2010;87(5):273-81. Available from: <https://dx.doi.org/10.1016/j.ciresp.2009.10.009>.

- 16 Dudding TC. Future indications for sacral nerve stimulation. *Colorectal Dis.* 2011;13 Suppl 2:23-8. Available from: <https://dx.doi.org/10.1111/j.1463-1318.2010.02522.x>.
- 17 Dudding TC, Hollingshead JR, Nicholls RJ, Vaizey CJ. Sacral nerve stimulation for faecal incontinence: optimizing outcome and managing complications. *Colorectal Dis.* 2011;13(8):e196-202. Available from: <https://dx.doi.org/10.1111/j.1463-1318.2011.02646.x>.
- 18 Dudding TC, Hollingshead JR, Nicholls RJ, Vaizey CJ. Sacral nerve stimulation for faecal incontinence: patient selection, service provision and operative technique. *Colorectal Dis.* 2011;13(8):e187-95. Available from: <https://dx.doi.org/10.1111/j.1463-1318.2011.02650.x>.
- 19 Ebert KM, Alpert SA. Sacral Neuromodulation: Improving Bladder and Bowel Dysfunction in Children. *Current Treatment Options in Pediatrics.* 2018;4(1):24-36. Available from: <http://dx.doi.org/10.1007/s40746-018-0116-1>.
- 20 Emile SH. How should we manage complete rectal prolapse in men? *Colorectal Disease.* 2019;21(10):1218-9. Available from: <http://dx.doi.org/10.1111/codi.14745>.
- 21 Enck P. Biofeedback training in disordered defecation. A critical review. *Digestive Diseases and Sciences.* 1993;38(11):1953-60. Available from: <http://dx.doi.org/10.1007/BF01297069>.
- 22 Enck P, Hinninghofen H, Wietek B, Becker HD. Functional asymmetry of pelvic floor innervation and its role in the pathogenesis of fecal incontinence. *Digestion.* 2004;69(2):102-11. Available from.
- 23 Essani R, Bergamaschi R, Uranues S. Surgical management of rectal prolapse: In the era of laparoscopic surgery. *European Surgery - Acta Chirurgica Austriaca.* 2009;41(5):203-8. Available from: <http://dx.doi.org/10.1007/s10353-009-0484-7>.
- 24 Fader M, Bliss D, Cottenden A, Moore K, Norton C. Continence products: research priorities to improve the lives of people with urinary and/or fecal leakage. *Neuroural Urodyn.* 2010;29(4):640-4. Available from: <https://dx.doi.org/10.1002/nau.20918>.
- 25 Fan Q, Cavus O, Xiong L, Xia Y. Spinal Cord Injury: How Could Acupuncture Help? *Journal of Acupuncture & Meridian Studies.* 2018;11(4):124-32. Available from: 10.1016/j.jams.2018.05.002.
- 26 Fattorini E, Brusa T, Gingert C, Hieber SE, Leung V, Osmani B, et al. Artificial Muscle Devices: Innovations and Prospects for Fecal Incontinence Treatment. *Annals of Biomedical Engineering.* 2016;44(5):1355-69. Available from: <http://dx.doi.org/10.1007/s10439-016-1572-z>.
- 27 Felt B, Wise CG, Olson A, Kochhar P, Marcus S, Coran A. Guideline for the management of pediatric idiopathic constipation and soiling. Multidisciplinary team from the University of Michigan Medical Center in Ann Arbor. *Arch Pediatr Adolesc Med.* 1999;153(4):380-5. Available from.
- 28 Felt B, Wise CG, Olson A, Kochhar P, Marcus S, Coran A. Guideline for the management of pediatric idiopathic constipation and soiling. *Archives of Pediatrics and Adolescent Medicine.* 1999;153(4):380-5. Available from: <http://dx.doi.org/10.1001/archpedi.153.4.380>.
- 29 Felt-Bersma RJ. Temperature-controlled radiofrequency energy in patients with anal incontinence: an interim analysis of worldwide data. *Gastroenterol Rep (Oxf).* 2014;2(2):121-5. Available from: <https://dx.doi.org/10.1093/gastro/gou016>.
- 30 Gras S, Tolstrup CK, Lose G. Regenerative medicine provides alternative strategies for the treatment of anal incontinence. *Int Urogynecol J Pelvic Floor Dysfunct.* 2017;28(3):341-50. Available from: <https://dx.doi.org/10.1007/s00192-016-3064-y>.
- 31 Harkless GE. Review: high-quality evidence on the effectiveness of laxatives for functional constipation in children is limited. *Evidence Based Nursing.* 2009;12(4):107-. Available from: 10.1136/ebn.12.4.107.
- 32 Hetzer FH. Fifteen years of sacral nerve stimulation: from an open procedure to a minimally invasive technique. *Colorectal Dis.* 2011;13 Suppl 2:1-4. Available from: <https://dx.doi.org/10.1111/j.1463-1318.2010.02517.x>.
- 33 Hounsome N, Roukas C. Cost-effectiveness of sacral nerve stimulation and percutaneous tibial nerve stimulation for faecal incontinence. *Therapeutic Advances in Gastroenterology.* 2018;11:1756284818802562. Available from: <https://dx.doi.org/10.1177/1756284818802562>.
- 34 Hulten L, Angeras U, Scaglia M, Delbro D. Sacral nerve stimulation (SNS), posterior tibial nerve stimulation (PTNS) or acupuncture for the treatment for fecal incontinence: a clinical commentary. *Tech Coloproctol.* 2013;17(5):589-92. Available from: <https://dx.doi.org/10.1007/s10151-013-0985-z>.
- 35 John ME. Treatments for Fecal Incontinence: Current State of the Evidence. *Agency for Healthcare Research and Quality (US).* 2007. Available from.
- 36 Keller KM. Evidence-based therapy of constipation and encopresis in children. [German]. *Monatsschrift fur Kinderheilkunde.* 2002;150(5):594-601. Available from: <http://dx.doi.org/10.1007/s00112-002-0473-4>.
- 37 Kersting S, Jung KP, Berg E. Alloplastic material in prolapse surgery: Indications and postoperative outcome of ventral rectopexy. [German]. *Coloproctology.* 2017;39(4):240-5. Available from: <http://dx.doi.org/10.1007/s00053-017-0174-z>.
- 38 Kong E, Nikolaou S, Qiu S, Pellino G, Tekkis P, Kontovounisios C. A systematic review of sacral nerve stimulation for faecal incontinence following ileal pouch anal anastomosis. *Updates Surg.* 2018;70(1):1-5. Available from: <https://dx.doi.org/10.1007/s13304-017-0496-y>.
- 39 Lancioni GE, F ORM, Basili G. Treating encopresis in people with intellectual disabilities: a literature review. *Journal of Applied Research in Intellectual Disabilities.* 2001;14(1):47-63. Available from.

- 40 Leroi AM. The role of sacral neuromodulation in double incontinence. *Colorectal Dis.* 2011;13 Suppl 2:15-8. Available from: <https://dx.doi.org/10.1111/j.1463-1318.2010.02520.x>.
- 41 Leung FW. Treatment of fecal incontinence - review of observational studies (OS) and randomized controlled trials (RCT) related to injection of bulking agent into peri-anal tissue. *J Interv Gastroenterol.* 2011;1(4):202-6. Available from:
- 42 Maeda Y, O'Connell PR, Lehur PA, Matzel KE, Laurberg S, European SNSBSG. Sacral nerve stimulation for faecal incontinence and constipation: a European consensus statement. *Colorectal Dis.* 2015;17(4):O74-87. Available from: <https://ovidsp.ovid.com/ovidweb.cgi?T=JS&CSC=Y&NEWS=N&PAGE=fulltext&D=med12&AN=25603960http://library.ncl.ac.uk/openurl/?sid=OVID&isbn=&issn=1462-8910&volume=17&issue=4&date=2015&title=Colorectal+Disease&atitle=Sacral+nerve+stimulation+for+faecal+incontinence> <https://dx.doi.org/10.1111/codi.12905>.
- 43 Malouf AJ, Chambers MG, Kamm MA. Clinical and economic evaluation of surgical treatments for faecal incontinence. *Br J Surg.* 2001;88(8):1029-36. Available from: <https://ovidsp.ovid.com/ovidweb.cgi?T=JS&CSC=Y&NEWS=N&PAGE=fulltext&D=med4&AN=11488786http://library.ncl.ac.uk/openurl/?sid=OVID&isbn=&issn=0007-1323&volume=88&issue=8&date=2001&title=British+Journal+of+Surgery&atitle=Clinical+and+economic+evaluation+of+s>.
- 44 Matzel KE. Sacral nerve stimulation for faecal incontinence: its role in the treatment algorithm. *Colorectal Dis.* 2011;13 Suppl 2:10-4. Available from: <https://ovidsp.ovid.com/ovidweb.cgi?T=JS&CSC=Y&NEWS=N&PAGE=fulltext&D=med8&AN=21284796http://library.ncl.ac.uk/openurl/?sid=OVID&isbn=&issn=1462-8910&volume=13&issue=2&date=2011&title=Colorectal+Disease&atitle=Sacral+nerve+stimulation+for+faecal+incontinence> <https://dx.doi.org/10.1111/j.1463-1318.2010.02519.x>.
- 45 Medical Advisory S. Sacral nerve stimulation for urinary urge incontinence, urgency-frequency, urinary retention, and fecal incontinence: an evidence-based analysis. *Ont Health Technol Assess Ser.* 2005;5(3):1-64. Available from:
- 46 Montroni I, Wexner SD. Reoperative surgery for fecal incontinence. *Seminars in Colon and Rectal Surgery.* 2015;26(4):237-48. Available from: <http://dx.doi.org/10.1053/j.scrs.2015.09.012>.
- 47 Murphy J, Scott SM, Gladman MA, Lunniss PJ. Faecal incontinence *British Journal of Surgery.* 2007;94(6):754. Available from: <http://dx.doi.org/10.1002/bjs.5895>.
- 48 Niriella DA, Deen KI. Neosphincters in the management of faecal incontinence. *Br J Surg.* 2000;87(12):1617-28. Available from:
- 49 Noblett KL, Dutta S. Sacral Neuromodulation for the Treatment of Pelvic Floor Disorders. *Current Bladder Dysfunction Reports.* 2017;12(1):26-34. Available from: <http://dx.doi.org/10.1007/s11884-017-0408-5>.
- 50 Norderval S, Rydningen M, Lindsetmo RO, Lein D, Vonon B. Sacral nerve stimulation. *Tidsskr Nor Laegeforen [Norwegian].* 2011;131(12):1190-3. Available from: <https://dx.doi.org/10.4045/tidsskr.10.1417>.
- 51 Norton C. Behavioral management of fecal incontinence in adults. *Gastroenterology.* 2004;126(1 Suppl 1):S64-70. Available from:
- 52 Paquette IM, Karram M. Current Assessment and Management of Fecal Incontinence. *Current Bladder Dysfunction Reports.* 2014;9(1):6-12. Available from: <http://dx.doi.org/10.1007/s11884-013-0223-6>.
- 53 Plunkett A, Phillips CP, Beattie RM. Management of chronic functional constipation in childhood. *Pediatric Drugs.* 2007;9(1):33-46. Available from: <http://dx.doi.org/10.2165/00148581-200709010-00004>.
- 54 Probst M, Pages H, Riemann JF, Eickhoff A, Raulf F, Kolbert G. Fecal incontinence: part 4 of a series of articles on incontinence. *Dtsch.* 2010;107(34-35):596-601. Available from: <https://dx.doi.org/10.3238/arztebl.2010.0596>.
- 55 Rajjindrajith S, Devanarayana NM, Benninga MA. Review article: faecal incontinence in children: epidemiology, pathophysiology, clinical evaluation and management. *Aliment Pharmacol Ther.* 2013;37(1):37-48. Available from: <https://dx.doi.org/10.1111/apt.12103>.
- 56 Rodrigues Leme LN, de Oliveira Souza NVD, Farias Chagas P. Cuidados de enfermagem e suas repercussões na vida da pessoa com incontinência anal: revisão integrativa [Spanish]. *Revista Enfermagem UERJ.* 2019;27:1-8. Available from: [10.12957/reuerj.2019.40285](https://doi.org/10.12957/reuerj.2019.40285).
- 57 Shamlivan T, Wyman J, Bliss DZ, Kane RL, Wilt TJ. *Prevention of fecal and urinary incontinence in adults.* United States: Agency for Healthcare Research and Quality (AHRQ); 2007. Available from:
- 58 Sigurdson E, Torhaug T. Spinal cord injury and bowel function. *Tidsskr Nor Laegeforen.* 2012;132(9):1107-10. Available from: <https://dx.doi.org/10.4045/tidsskr.10.0928>.
- 59 Simillis C, Lal N, Qiu S, Kontovounisios C, Rasheed S, Tan E, et al. Sacral nerve stimulation versus percutaneous tibial nerve stimulation for faecal incontinence: a systematic review and meta-analysis. *Int J Colorectal Dis.* 2018;33(5):645-8. Available from: <https://dx.doi.org/10.1007/s00384-018-2976-z>.
- 60 Skardoon GR, Khera AJ, Emmanuel AV, Burgell RE. Review article: dyssynergic defaecation and biofeedback therapy in the pathophysiology and management of functional constipation. *Aliment Pharmacol Ther.* 2017;46(4):410-23. Available from: <https://dx.doi.org/10.1111/apt.14174>.
- 61 Tabbers MM, Boluyt N, Berger MY, Benninga MA. Constipation in children. *Clin Evid (Online).* 2010;06:06. Available from:

- 62 Vaizey CJ, Kamm MA, Nicholls RJ. Recent advances in the surgical treatment of faecal incontinence. *Br J Surg*. 1998;85(5):596-603. Available from.
- 63 van der Schans EM, Paulides TJC, Wijffels NA, Consten ECJ. Management of patients with rectal prolapse: the 2017 Dutch guidelines. *Tech Coloproctol*. 2018;22(8):589-96. Available from: <https://dx.doi.org/10.1007/s10151-018-1830-1>.
- 64 van Engelenburg-van Lonkhuyzen ML, Bols EMJ, Benninga M, Groen LA, Chase J, de Bie R. Physiotherapy interventions for functional bladder and bowel dysfunctions in neurologically normal and otherwise healthy children [protocol]. *Cochrane Database of Systematic Reviews*. 2016(11). Available from: 10.1002/14651858.CD012434.
- 65 Watson NF, Koshy A, Sagar PM. Anal bulking agents for faecal incontinence. *Colorectal Dis*. 2012;14 Suppl 3:29-33. Available from: <https://dx.doi.org/10.1111/codi.12047>.
- 66 Wolff K, Gingert C. Percutaneous tibial nerve stimulation for the treatment of faecal incontinence. [German]. *Coloproctology*. 2015;37(1):5-10. Available from: <http://dx.doi.org/10.1007/s00053-014-0461-x>.
- 67 Worsoe J, Rasmussen M, Christensen P, Krogh K. Neurostimulation for neurogenic bowel dysfunction. *Gastroenterol Res Pract*. 2013;2013:563294. Available from: <https://dx.doi.org/10.1155/2013/563294>.
- 68 Yang S, Chua ME, Bauer S, Wright A, Brandstrom P, Hoebek P, et al. Diagnosis and management of bladder bowel dysfunction in children with urinary tract infections: a position statement from the International Children's Continence Society. *Pediatr Nephrol*. 2018;33(12):2207-19. Available from: <https://dx.doi.org/10.1007/s00467-017-3799-9>.
- 69 Yi Z, Jie C, Wenyi Z, Bin X, Hongzhu J. Comparison of efficacies of vegetable oil based and polyethylene glycol based bisacodyl suppositories in treating patients with neurogenic bowel dysfunction after spinal cord injury: a meta-analysis. *Turk J Gastroenterol*. 2014;25(5):488-92. Available from: <https://dx.doi.org/10.5152/tjg.2014.6708>.
- 70 Bisanz A. Managing bowel elimination problems in patients with cancer. *Oncol Nurs Forum*. 1997;24(4):679-86; quiz 87. Available from.
- 71 Ehrenpreis ED, Chang D, Eichenwald E. Pharmacotherapy for fecal incontinence: a review. *Dis Colon Rectum*. 2007;50(5):641-9. Available from.
- 72 Caremel R, Grise P, Leroi AM. The sacral neuromodulation in double incontinence treatment: a review. *Prog Urol*. 2010;22(6):318-25. Available from: <https://dx.doi.org/10.1016/j.purol.2011.12.007>.
- 73 Beeckman D, Defloor T, Verhaeghe S, Vanderwee L, Demarre L, Schoonhoven L. What is the most effective method of preventing and treating incontinence associated dermatitis? *Nursing Times*. 2010;106(38):22-5. Available from.
- 74 Beitz JM. Fecal incontinence in acutely and critically ill patients: options in management. *Ostomy Wound Manage*. 2006;52(12):56-8, 60, 2. Available from.
- 75 Birch L, Doyle PM, Ellis R, Hogard E. Failure to void in labour: postnatal urinary and anal incontinence. *British Journal of Midwifery*. 2009;17(9):562-6. Available from: 10.12968/bjom.2009.17.9.43887.
- 76 Bo K. Does pelvic floor muscle training prevent and treat urinary and fecal incontinence in pregnancy? *Nat Clin Pract Urol*. 2009;6(3):122-3. Available from: <https://dx.doi.org/10.1038/ncpuro1313>.
- 77 Deffieux X, Vieillefosse S, Billecocq S, Battut A, Nizard J, Coulm B, et al. Postpartum pelvic floor muscle training and abdominal rehabilitation: Guidelines. *J Gynecol Obstet Biol Reprod (Paris)*. 2015;44(10):1141-6. Available from: <https://dx.doi.org/10.1016/j.jgyn.2015.09.023>.
- 78 Dudding TC, Vaizey CJ, Kamm MA. Obstetric anal sphincter injury: incidence, risk factors, and management. *Ann Surg*. 2008;247(2):224-37. Available from: <https://dx.doi.org/10.1097/SLA.0b013e318142cdf4>.
- 79 Falloon SS, Abbas S, Stridfeldt C, Cottenden A. The Impact of Microclimate on Skin Health With Absorbent Incontinence Product Use: An Integrative Review. *J Wound Ostomy Continence Nurs*. 2018;45(4):341-8. Available from: <https://dx.doi.org/10.1097/WON.0000000000000449>.
- 80 Fowler GE. Risk factors for and management of obstetric anal sphincter injury. *Obstetrics, Gynaecology and Reproductive Medicine*. 2013;23(5):131-6. Available from: <http://dx.doi.org/10.1016/j.ogrm.2013.03.004>.
- 81 Ernst E. Systematic Reviews of Biofeedback. *Physikalische Medizin Rehabilitationsmedizin Kurortmedizin*. 2003;13(6):321-4. Available from: <http://dx.doi.org/10.1055/s-2003-45436>.
- 82 Micheli C, Palese A, Canzan F, Ambrosi E. No Sting Barrier Film to Protect Skin in Adult Patients: Findings From a Scoping Review With Implications for Evidence-Based Practice. *Worldviews Evid Based Nurs*. 2017;14(5):403-11. Available from: <https://dx.doi.org/10.1111/wvn.12232>.
- 83 Bharucha AE, Pemberton JH, Locke IGR. American gastroenterological association technical review on constipation. *Gastroenterology*. 2013;144(1):218-38. Available from: <http://dx.doi.org/10.1053/j.gastro.2012.10.028>.
- 84 Candy D, Belsey J. Macrogol (polyethylene glycol) laxatives in children with functional constipation and faecal impaction: a systematic review. *Archives of Disease in Childhood*. 2009;94(2):156-60. Available from: 10.1136/adc.2007.128769.
- 85 Cherniack EP. Use of complementary and alternative medicine to treat constipation in the elderly. *Geriatrics and Gerontology International*. 2013;13(3):533-8. Available from: <http://dx.doi.org/10.1111/ggi.12023>.
- 86 Badakhsh M, Khorasani B, Arab AM, Forootan M. The Role of Pelvic Floor Muscle Dysfunction in Subjects with Fecal Incontinence and Efficacy of Pelvic Floor Muscle Retraining in Treatment: A Literature Review. *Iranian Journal of Gastroenterology & Hepatology (GOVARESH)*. 2014;19(2):1-10. Available from.



- 87 Furtwangler A. Systematic review of perianal implants in the treatment of faecal incontinence. [German]. *Coloproctology*. 2012;34(6):443-4. Available from: <http://dx.doi.org/10.1007/s00053-012-0325-1>.
- 88 Greer WJ, Richter HE, Bartolucci AA, Burgio KL. Obesity and pelvic floor disorders: a systematic review. *Obstet Gynecol*. 2008;112(2 Pt 1):341-9. Available from: <https://dx.doi.org/10.1097/AOG.0b013e31817cfdde>.
- 89 Senat MV, Sentilhes L, Battut A, Benhamou D, Bydlowski S, Chantry A, et al. Postpartum practice: guidelines for clinical practice from the French College of Gynaecologists and Obstetricians (CNGOF). *Eur J Obstet Gynecol Reprod Biol*. 2016;202:1-8. Available from: <https://dx.doi.org/10.1016/j.ejogrb.2016.04.032>.
- 90 Johnson ME, Johnson JL. Management of slow colonic transit constipation in Parkinson's disease: Current evidence and a community pharmacy perspective. *International Journal of Pharmacy and Pharmaceutical Sciences*. 2016;8(7):27-34. Available from.
- 91 Maeda Y, Hoyer M, Lundby L, Norton C. Faecal incontinence following radiotherapy for prostate cancer: a systematic review. *Radiother Oncol*. 2011;98(2):145-53. Available from: <https://dx.doi.org/10.1016/j.radonc.2010.12.004>.
- 92 Lin TR, Hwang MR, Nien HH, Liu CC, Shie PS, Chen SH. Reducing the Incidence of Incontinence Associated Dermatitis in Intensive Care Unit Diarrhea Patients. *Hu Li Tsa Chih*. 2015;62(6):81-9. Available from: <https://dx.doi.org/10.6224/JN62.6.81>.
- 93 Anonymous. NIH state-of-the-science conference statement on prevention of fecal and urinary incontinence in adults. *NIH Consens State Sci Statements*. 2007;24(1):1-37. Available from.
- 94 Harari D, Gurwitz JH, Minaker KL. Constipation in the elderly. *Journal of the American Geriatrics Society*. 1993;41(10):1130-40. Available from: <http://dx.doi.org/10.1111/j.1532-5415.1993.tb06463.x>.
- 95 Newman DK, Fader M, Bliss DZ. Managing incontinence using technology, devices, and products: directions for research. *Nurs Res*. 2004;53(6 Suppl):S42-8. Available from.
- 96 Matzel KE, Stadelmaier U, Hohenberger W. Innovations in fecal incontinence: sacral nerve stimulation. *Dis Colon Rectum*. 2004;47(10):1720-8. Available from.
- 97 Moffatt ME. Review: behavioral interventions plus laxatives are effective for defecation disorders, but biofeedback does not add benefit. *ACP Journal Club*. 2002;137(1):28-. Available from.
- 98 Mugie SM, Di Lorenzo C, Benninga MA. Constipation in childhood. *Nature Reviews Gastroenterology & Hepatology*. 2011;8(9):502-11. Available from: 10.1038/nrgastro.2011.130.
- 99 Murphy J, Lawes D, Vasudevan S, Scott M, Lunniss P. New treatment options for patients with faecal incontinence. *Gastrointestinal Nursing*. 2008;6(1):32-8. Available from: 10.12968/gasn.2008.6.1.28663.
- 100 Nevoral J. Chronic constipation in children. [Czech]. *Pediatric pro Praxi*. 2011;12(1):22-9. Available from.
- 101 Jurgens H, Oster C, Fereday J. Management of chronic functional constipation in children: a review of the literature. *Neonatal, Paediatric & Child Health Nursing*. 2011;14(2):23-8. Available from.
- 102 Putta S, Andreyev HJ. Faecal incontinence: A late side-effect of pelvic radiotherapy. *Clin Oncol (R Coll Radiol)*. 2005;17(6):469-77. Available from.
- 103 Dupuis O, Madelenat P, Rudigoz RC. Fecal and urinary incontinence after delivery: Risk factors and prevention. [French]. *Gynecologie Obstetrique et Fertilité*. 2004;32(6):540-8. Available from: <http://dx.doi.org/10.1016/j.gyobfe.2004.02.020>.
- 104 Solomons J, Woodward S. Digital removal of faeces in the bowel management of patients with spinal cord injury: a review. *British Journal of Neuroscience Nursing*. 2013;9(5):216-22. Available from: 10.12968/bjnn.2013.9.5.216.
- 105 Togli MR, DeLancey JOL. Anal incontinence and the obstetrician-gynecologist. *Obstetrics and Gynecology*. 1994;84(4 II SUPPL.):731-40. Available from.
- 106 Rao SS. Current and emerging treatment options for fecal incontinence. *J Clin Gastroenterol*. 2014;48(9):752-64. Available from: <https://dx.doi.org/10.1097/MCG.000000000000180>.
- 107 Karim Ruiz MA, Gallego Molina J, Gavilán Díaz M. Esferas vaginales: Función terapéutica [Spanish]. *Cultura de los Cuidados*. 2014;18(40):93-8. Available from: 10.7184/cuid.2014.40.12.
- 108 Cohn JA, Kowalik CG, Kaufman MR, Reynolds WS, Milam DF, Dmochowski RR. Evaluation of the axonics modulation technologies sacral neuromodulation system for the treatment of urinary and fecal dysfunction. *Expert Review of Medical Devices*. 2017;14(1):3-14. Available from: <http://dx.doi.org/10.1080/17434440.2017.1268913>.
- 109 Dupree HJ, Roblick UJ, Bruch HP, Schiedeck THK. Surgical treatment of rectal prolapse. [German]. *Viszeralchirurgie*. 2002;37(1):40-7. Available from: <http://dx.doi.org/10.1055/s-2002-20327>.
- 110 Heymen S, Jones KR, Ringel Y, Scarlett Y, Whitehead WE. Biofeedback treatment of fecal incontinence: a critical review. *Dis Colon Rectum*. 2001;44(5):728-36. Available from.
- 111 Heymen S, Jones KR, Scarlett Y, Whitehead WE. Biofeedback treatment of constipation: a critical review. *Dis Colon Rectum*. 2003;46(9):1208-17. Available from.
- 112 Landers M, Savage E, McCarthy G, Fitzpatrick JJ. Self-Care Strategies for the Management of Bowel Symptoms Following Sphincter-Saving Surgery for Rectal Cancer. *Clinical Journal of Oncology Nursing*. 2011;15(6):E105-13. Available from: 10.1188/11.CJON.E105-E113.
- 113 Tucker J, Wilson A, Clifton V. Women's experience of anal incontinence following a history of obstetric anal sphincter injury: A literature review. *International Journal of Evidence-Based Healthcare*. 2013;11(3):181-6. Available from: <http://dx.doi.org/10.1111/1744-1609.12025>.

- 114 Tremback-Ball A, Gherghel E, Hegge A, Kindig K, Marsico H, Scanlon R. The effectiveness of biofeedback therapy in managing bladder bowel dysfunction in children: A systematic review. *J Pediatr Rehabil Med*. 2018;11(3):161-73. Available from: <https://dx.doi.org/10.3233/PRM-170527>.
- 115 Marti L. Electrical stimulation and biofeedback for the treatment of fecal incontinence: A systematic review. [German]. *Coloproctology*. 2014;36(6):491-2. Available from: <http://www.springerlink.com/content/101784/https://ovidsp.ovid.com/ovidweb.cgi?T=JS&CSC=Y&NEWS=N&PAGE=fulltext&D=emed15&AN=600687561http://library.ncl.ac.uk/openurl/?sid=OVID&isbn=&issn=0174-2442&volume=36&issue=6&date=2014&title=Coloproctology&atitle=Ele> <http://dx.doi.org/10.1007/s00053-014-0506-1>.
- 116 Matzel KE. Sacral nerve stimulation for fecal incontinence. What has been achieved (current status). *Acta chir*. 2010;57(3):67-72. Available from.
- 117 Mikkelsen EJ. Enuresis and encopresis: ten years of progress. *J Am Acad Child Adolesc Psychiatry*. 2001;40(10):1146-58. Available from.
- 118 Niu S, Griebing TL, Kowalik CG. Impact of Frailty on the Treatment of Pelvic Floor Disorders. *Current Bladder Dysfunction Reports*. 2020. Available from: <http://dx.doi.org/10.1007/s11884-020-00590-4>.
- 119 Pescatori M. Systematic review of sacral nerve stimulation for faecal incontinence and constipation *British Journal of Surgery*. 2005;92(3):379. Available from: <https://ovidsp.ovid.com/ovidweb.cgi?T=JS&CSC=Y&NEWS=N&PAGE=fulltext&D=emed9&AN=40445608http://library.ncl.ac.uk/openurl/?sid=OVID&isbn=&issn=0007-1323&volume=92&issue=3&date=2005&title=British+Journal+of+Surgery&atitle=Systematic+review+of+sacral+nerve+st> <http://dx.doi.org/10.1002/bjs.4972>.
- 120 Pescatori M. Systematic review of sacral nerve stimulation for faecal incontinence and constipation *Br J Surg*. 2005;92(3):379. Available from.
- 121 Reading R. Commentary on: Macrogol (polyethylene glycol) laxatives in children with functional constipation and faecal impaction: a systematic review. *Child: Care, Health & Development*. 2009;35(3):434-. Available from: [10.1111/j.1365-2214.2009.00971\\_6.x](10.1111/j.1365-2214.2009.00971_6.x).
- 122 Sato M, Hidaka K. Review of the nursing care for rectal cancer patients with defecation disorder following anterior resection. *Journal of Japan Academy of Nursing Science*. 2012;32(2):64-71. Available from: [10.5630/jans.32.2\\_64](10.5630/jans.32.2_64).
- 123 Saunders SB, Jayasekara R. Absorbent products for moderate-heavy urinary and/or faecal incontinence in women and men. *Journal of Advanced Nursing*. 2009;65(6):1184-5. Available from.
- 124 Schwandner T. Sacral nerve stimulation in faecal incontinence associated with an anal sphincter lesion: A systematic review. [German]. *Coloproctology*. 2014;36(1):50-1. Available from: <http://dx.doi.org/10.1007/s00053-013-0406-9>.
- 125 Secco L. Review: behavioural interventions plus laxatives are effective for defecation disorders in children, but biofeedback does not add benefit. *Evidence Based Nursing*. 2002;5(3):76-. Available from.
- 126 Thin NN, Knowles C, Allison M. Sacral nerve stimulation in patients with faecal incontinence. *Gastrointestinal Nursing*. 2012;10(1):36-44. Available from: <10.12968/gasn.2012.10.1.36>.
- 127 Toglia MR, DeLancey JO. Anal incontinence and the obstetrician-gynecologist. *Obstet Gynecol*. 1994;84(4 Pt 2):731-40. Available from.
- 128 Zaffanello M, Banzato C, Piacentini G. Management of constipation in preventing urinary tract infections in children: A concise review. *European Research Journal*. 2019;5(2):236-43. Available from: <http://dx.doi.org/10.18621/eurj.412280>.
- 129 Baun RF, Levy HB. Tegaserod for treating chronic constipation in elderly patients. *Annals of Pharmacotherapy*. 2007;41(2):309-13. Available from.
- 130 Deffieux X, Vieillefosse S, Billecoq S, Battut A, Nizard J, Coulm B, et al. Postpartum pelvic floor muscle training and abdominal rehabilitation: Guidelines. [French]. *Journal de Gynecologie Obstetrique et Biologie de la Reproduction*. 2015;44(10):1141-6. Available from: <http://dx.doi.org/10.1016/j.jgyn.2015.09.023>.
- 131 Wood RJ, Yacob D, Levitt MA. Surgical options for the management of severe functional constipation in children. *Curr Opin Pediatr*. 2016;28(3):370-9. Available from: <https://dx.doi.org/10.1097/MOP.0000000000000345>.
- 132 Pratt T, Mishra K. Evaluation and management of defecatory dysfunction in women. *Current Opinion in Obstetrics & Gynecology*. 2018;30(6):451-7. Available from: <10.1097/GCO.0000000000000495>.
- 133 Read TE, Fleshman JW. Outcomes: Assessing the effectiveness of fecal incontinence therapy. *Seminars in Colon and Rectal Surgery*. 1997;8(2):121-5. Available from.
- 134 Ihnat P, Jelinek P, Gunkova P, Martinek L, Vavra P, Zonca P. Surgical rectocele repair - many techniques, few unambiguous conclusions. *Rozhl Chir*. 2014;93(4):188-93. Available from.
- 135 Johnston AW, Wiener JS, Todd Purves J. Pediatric Neurogenic Bladder and Bowel Dysfunction: Will my child ever be out of diapers? *Eur Urol Focus*. 2020;22:22. Available from: <https://dx.doi.org/10.1016/j.euf.2020.01.003>.
- 136 Carrington EV, Evers J, Grossi U, Dinning PG, Scott SM, O'Connell PR, et al. A systematic review of sacral nerve stimulation mechanisms in the treatment of fecal incontinence and constipation. *Neurogastroenterol Motil*. 2014;26(9):1222-37. Available from: <https://dx.doi.org/10.1111/nmo.12388>.

- 137 Krassioukov A, Eng JJ, Claxton G, Sakakibara BM, Shum S. Neurogenic bowel management after spinal cord injury: a systematic review of the evidence. *Spinal Cord*. 2010;48(10):718-33. Available from: <https://dx.doi.org/10.1038/sc.2010.14>.
- 138 Matibag GC, Nakazawa H, Giamundo P, Tamashiro H. Trends and current issues in adult fecal incontinence (FI): Towards enhancing the quality of life for FI patients. *Environ*. 2003;8(4):107-17. Available from: <https://dx.doi.org/10.1007/BF02897914>.
- 139 Lambert D. Prevention of incontinence-associated dermatitis in nursing home residents. *Annals of Long-Term Care*. 2012;20(5):25-9. Available from.
- 140 Chiarioni G, Palsson OS, Asteria CR, Whitehead WE. Neuromodulation for fecal incontinence: An effective surgical intervention. *World Journal of Gastroenterology*. 2013;19(41):7048-54. Available from: <http://dx.doi.org/10.3748/wjg.v19.i41.7048>.
- 141 Sajid MS, Khatri K, Siddiqui MR, Baig MK. Endo-anal ultrasound versus endo-anal magnetic resonance imaging for the depiction of external anal sphincter pathology in patients with faecal incontinence: a systematic review. *Magyar Sebészet*. 2010;63(1):9-15. Available from: <https://ovidsp.ovid.com/ovidweb.cgi?T=JS&CSC=Y&NEWS=N&PAGE=fulltext&D=med8&AN=20156788http://library.ncl.ac.uk/openurl/?sid=OVID&isbn=&issn=0025-0295&volume=63&issue=1&date=2010&title=Magyar+Sebeszet&atitle=Endo-anal+ultrasound+versus+endo-anal+magnetic+r> <https://dx.doi.org/10.1556/MaSeb.63.2010.1.2>.
- 142 Khorasani F, Ghaderi F, Sarbakhsh P, Ahadi P, Khorasani E, Ansari F, et al. Physiotherapy and pelvic floor muscle exercises for the prevention and treatment of pregnancy-related pelvic floor dysfunctions: A systematic review and meta-analysis. *International Journal of Women's Health and Reproduction Sciences*. 2020;8(2):125-32. Available from: <http://dx.doi.org/10.15296/ijwhr.2020.20>.
- 143 Huang Y, Koh CE. Sacral nerve stimulation for bowel dysfunction following low anterior resection: a systematic review and meta-analysis. *Colorectal Dis*. 2019;21(11):1240-8. Available from: <https://dx.doi.org/10.1111/codi.14690>.
- 144 van Dijk M, Benninga MA, Grootenhuis MA, Nieuwenhuizen AM, Last BF. Chronic childhood constipation: a review of the literature and the introduction of a protocolized behavioral intervention program. *Patient Educ Couns*. 2007;67(1-2):63-77. Available from.
- 145 Tabbers MM, Boluyt N, Berger MY, Benninga MA. Clinical practice: Diagnosis and treatment of functional constipation. *European Journal of Pediatrics*. 2011;170(8):955-63. Available from: <http://dx.doi.org/10.1007/s00431-011-1515-5>.
- 146 Leung L, Riutta T, Kotecha J, Rosser W. Chronic constipation: An evidence-based review. *Journal of the American Board of Family Medicine*. 2011;24(4):436-51. Available from: <http://dx.doi.org/10.3122/jabfm.2011.04.100272>.
- 147 Oberwalder M, Dinnewitzer A, Baig MK, Thaler K, Cotman K, Noguerras JJ, et al. The association between late-onset fecal incontinence and obstetric anal sphincter defects. *Arch Surg*. 2004;139(4):429-32. Available from.
- 148 Lee LC, Koyle MA. The Role of Bladder and Bowel Dysfunction (BBD) in Pediatric Urinary Tract Infections. *Current Bladder Dysfunction Reports*. 2014;9(3):188-96. Available from: <http://dx.doi.org/10.1007/s11884-014-0240-0>.
- 149 Cook TA, Brading AF, Mortensen NJ. The pharmacology of the internal anal sphincter and new treatments of anorectal disorders. *Aliment Pharmacol Ther*. 2001;15(7):887-98. Available from.
- 150 Emmertsen KJ, Laurberg S. Bowel dysfunction after treatment for rectal cancer. *Acta Oncol*. 2008;47(6):994-1003. Available from: <https://dx.doi.org/10.1080/02841860802195251>.
- 151 Arya S, Gupta N, Gupta R, Aggarwal A. Constipation and Outcomes of Cecostomy. *American Journal of Therapeutics*. 2016;23(6):e1867-e75. Available from.
- 152 Saranovic D, Barisic G, Krivokapic Z, Masulovic D, Djuric-Stefanovic A. Endoanal ultrasound evaluation of anorectal diseases and disorders: Technique, indications, results and limitations. *European Journal of Radiology*. 2007;61(3):480-9. Available from: <http://dx.doi.org/10.1016/j.ejrad.2006.07.033>.
- 153 Pettersen R. Incontinence after stroke. *Tidsskr Nor Laegeforen*. 2007;127(10):1383-6. Available from.
- 154 Tahseen S. Role of sacral neuromodulation in modern urogynaecology practice: a review of recent literature. *International Urogynecology Journal*. 2018;29(8):1081-91. Available from: <http://dx.doi.org/10.1007/s00192-017-3546-6>.
- 155 Cohan JN, Varma MG. Reoperative surgery for recurrent rectal prolapse. *Seminars in Colon and Rectal Surgery*. 2015;26(4):182-6. Available from: <http://dx.doi.org/10.1053/j.scrcs.2015.09.004>.
- 156 Diederer K, Mugie SM, Benninga MA. Efficacy and safety of prucalopride in adults and children with chronic constipation. *Expert Opin Pharmacother*. 2015;16(3):407-16. Available from: <https://dx.doi.org/10.1517/14656566.2015.996547>.
- 157 Hong MK, Ding DC. Current Treatments for Female Pelvic Floor Dysfunctions. *Gynecol Minim Invasive Ther*. 2019;8(4):143-8. Available from: [https://dx.doi.org/10.4103/GMIT.GMIT\\_7\\_19](https://dx.doi.org/10.4103/GMIT.GMIT_7_19).
- 158 Karram M, Maher C. Surgery for posterior vaginal wall prolapse. *International Urogynecology Journal*. 2013;24(11):1835-41. Available from: <http://dx.doi.org/10.1007/s00192-013-2174-z>.
- 159 Bharucha AE. Fecal incontinence. *Gastroenterology*. 2003;124(6):1672-85. Available from: <http://dx.doi.org/10.1016/S0016-5085%2803%2900329-9>.



- 160 Williams KS, Shalom DF, Winkler HA. Faecal incontinence: a narrative review of clinic-based management for the general gynaecologist. *J Obstet Gynaecol.* 2018;38(1):1-9. Available from: <https://dx.doi.org/10.1080/01443615.2017.1344204>.
- 161 Gie O, Christoforidis D. Advances in the Treatment of Fecal Incontinence. *Seminars in Colon and Rectal Surgery.* 2011;22(1):30-8. Available from: <http://dx.doi.org/10.1053/j.scrs.2010.11.001>.
- 162 Ramalingam K, Monga A. Obesity and pelvic floor dysfunction. *Best Practice and Research: Clinical Obstetrics and Gynaecology.* 2015;29(4):541-7. Available from: <http://dx.doi.org/10.1016/j.bpobgyn.2015.02.002>.
- 163 Abdool Z, Sultan AH, Thakar R. Ultrasound imaging of the anal sphincter complex: a review. *Br J Radiol.* 2012;85(1015):865-75. Available from: <https://dx.doi.org/10.1259/bjr/27314678>.
- 164 Rawashdeh YF, Austin P, Siggaard C, Bauer SB, Franco I, de Jong TP, et al. International Children's Continence Society's recommendations for therapeutic intervention in congenital neuropathic bladder and bowel dysfunction in children. *Neurourol Urodyn.* 2012;31(5):615-20. Available from: <https://dx.doi.org/10.1002/nau.22248>.
- 165 Sood M, Lichtlen P, Perez MC. Unmet Needs in Pediatric Functional Constipation. *Clinical Pediatrics.* 2018;57(13):1489-95. Available from: 10.1177/0009922818774343.
- 166 Wagg AS, Newman DK, Leichsenring K, van Houten P. Developing an internationally-applicable service specification for continence care: systematic review, evidence synthesis and expert consensus. *PLoS ONE.* 2014;9(8):e104129. Available from: <https://ovidsp.ovid.com/ovidweb.cgi?T=JS&CSC=Y&NEWS=N&PAGE=fulltext&D=medc&AN=25121511http://library.ncl.ac.uk/openurl/?sid=OVID&isbn=&issn=1932-6203&volume=9&issue=8&date=2014&title=PLoS+ONE+%5BElectronic+Resource%5D&atitle=Developing+an+internationally-> <https://dx.doi.org/10.1371/journal.pone.0104129>.
- 167 Zbar AP, Lienemann A, Fritsch H, Beer-Gabel M, Pescatori M. Rectocele: pathogenesis and surgical management. *Int J Colorectal Dis.* 2003;18(5):369-84. Available from: <http://dx.doi.org/10.1067/mge.2003.98>.
- 168 Zhao X, Pasricha PJ. Botulinum toxin for spastic GI disorders: A systematic review. *Gastrointestinal Endoscopy.* 2003;57(2):219-35. Available from: <http://dx.doi.org/10.1067/mge.2003.98>.
- 169 Eu KW, Seow-Choen F. Functional problems in adult rectal prolapse and controversies in surgical treatment. *Br J Surg.* 1997;84(7):904-11. Available from: <http://dx.doi.org/10.1053/bjs.1997.847904>.
- 170 Southwell BR. Treatment of childhood constipation: a synthesis of systematic reviews and meta-analyses. *Expert rev.* 2020;14(3):163-74. Available from: <https://dx.doi.org/10.1080/17474124.2020.1733974>.
- 171 Assis GM, Silva C, Martins G. Urotherapy in the treatment of children and adolescents with bladder and bowel dysfunction: a systematic review. *J Pediatr (Rio J).* 2019;95(6):628-41. Available from: <https://dx.doi.org/10.1016/j.jped.2019.02.007>.
- 172 Aboumarzouk OM, Shariff U, Antakia R, Agarwal T, Nelson RL. Cisapride for intestinal constipation. *Cochrane Database of Systematic Reviews.* 2009;(2) (no pagination)(CD007780). Available from: <http://dx.doi.org/10.1002/14651858.CD007780>.
- 173 Yang W, He T, Zhang W, Gu L, Tu R, Liu H. Effectiveness and safety of lactobacilli in children with functional constipation: Study protocol for a meta-analysis and systematic review. *Medicine.* 2019;98(20):e15675-e. Available from: 10.1097/MD.00000000000015675.
- 174 Maeda Y, Laurberg S, Norton CS. Perianal injectable bulking agents as treatment for faecal incontinence. *Cochrane Database of Systematic Reviews.* 2009;(3) (no pagination)(CD007959). Available from: <http://dx.doi.org/10.1002/14651858.CD007959>.
- 175 Hodgkinson B, Tuckett AG, Hegney D, Patterson J, Kralik D. Effectiveness of interventions to raise men's awareness of bladder and bowel health: A systematic review. *JB Library of Systematic Reviews.* 2010;8:1-14. Available from: 10.11124/jbisrir-2010-841.
- 176 Fallon AB, Westaway J, Moloney C. A systematic review of instruments for the assessment of faecal incontinence for community-dwelling older persons. *JB Libr Syst Rev.* 2005;3(7 Suppl):1-9. Available from: <http://dx.doi.org/10.11124/jbisrir-2010-841>.
- 177 Fallon AB, Westaway J, Moloney C. A systematic review of instruments for the assessment of faecal incontinence for community-dwelling older persons. *JB Library of Systematic Reviews.* 2014;3(7 SUPPL.):S37-S45. Available from: <http://dx.doi.org/10.11124/jbisrir-2010-841>.
- 178 van Engelenburg-van Lonkhuyzen ML, Bols EMJ, Benninga M, Groen LA, Chase J, de Bie R. Physiotherapy interventions for functional bladder and bowel dysfunctions in neurologically normal and otherwise healthy children. *Cochrane Database of Systematic Reviews.* 2016;2016 (11) (no pagination)(CD012434). Available from: <http://dx.doi.org/10.1002/14651858.CD012434>.
- 179 Leira E, Hodgkinson B, Josephs K. Effectiveness of continence education on knowledge levels and continence outcomes in older adults: a systematic review. *JB Library of Systematic Reviews.* 2010;8:1-8. Available from: 10.11124/jbisrir-2010-844.
- 180 Cotterill N, Sullivan A, Norton C, Wilkins A, Weir I, Kilonzo M, et al. Conservative interventions for urinary or faecal incontinence, or both, in adults with multiple sclerosis. *Cochrane Database of Systematic Reviews.* 2018;2018 (10) (no pagination)(CD013150). Available from: <http://dx.doi.org/10.1002/14651858.CD013150>.
- 181 Jones J, Van de Putte D, De Ridder D, Knowles C, O'Connell R, Nelson D, et al. A Joint Mechanism of Action for Sacral Neuromodulation for Bladder and Bowel Dysfunction? *Urology.* 2016;97:13-9. Available from: <http://dx.doi.org/10.1016/j.urology.2016.05.032>.

- 182 Drennan VM, Rait G, Cole L, Grant R, Iliffe S. The prevalence of incontinence in people with cognitive impairment or dementia living at home: a systematic review. *NeuroUrol Urodyn*. 2013;32(4):314-24. Available from: <https://dx.doi.org/10.1002/nau.22333>.
- 183 Fernando R, Sultan AH, Kettle C, Thakar R, Radley S. Methods of repair for obstetric anal sphincter injury. *Cochrane Database Syst Rev*. 2006(3):CD002866. Available from.
- 184 Sung VW, Rogers RG, Schaffer JI, Balk EM, Uhlig K, Lau J, et al. Graft use in transvaginal pelvic organ prolapse repair: A systematic review. *Obstetrics and Gynecology*. 2008;112(5):1131-42. Available from: <http://dx.doi.org/10.1097/AOG.0b013e3181898ba9>.
- 185 Guinane J, Crone R. Faecal incontinence in older people in Australia and New Zealand: a narrative review. *Australian & New Zealand Continence Journal*. 2017;23(1):6-13. Available from.
- 186 Beeckman D, Van Lancker A, Van Hecke A, Verhaeghe S. A systematic review and meta-analysis of incontinence-associated dermatitis, incontinence, and moisture as risk factors for pressure ulcer development. *Res Nurs Health*. 2014;37(3):204-18. Available from: <https://dx.doi.org/10.1002/nur.21593>.
- 187 Gourcerol G, Vitton V, Leroi AM, Michot F, Abysique A, Bouvier M. How sacral nerve stimulation works in patients with faecal incontinence. *Colorectal Dis*. 2011;13(8):e203-11. Available from: <https://dx.doi.org/10.1111/j.1463-1318.2011.02623.x>.
- 188 Kaplan SA, Dmochowski R, Cash BD, Kopp ZS, Berriman SJ, Khullar V. Systematic review of the relationship between bladder and bowel function: implications for patient management. *Int J Clin Pract*. 2013;67(3):205-16. Available from: <https://dx.doi.org/10.1111/ijcp.12028>.
- 189 Macmillan AK, Merrie AE, Marshall RJ, Parry BR. The prevalence of fecal incontinence in community-dwelling adults: a systematic review of the literature. *Dis Colon Rectum*. 2004;47(8):1341-9. Available from.
- 190 Koppen IJ, Kuizenga-Wessel S, Saps M, Di Lorenzo C, Benninga MA, van Etten-Jamaludin FS, et al. Functional Defecation Disorders and Excessive Body Weight: A Systematic Review. *Pediatrics*. 2016;138(3):e20161417. Available from: <https://dx.doi.org/10.1542/peds.2016-1417>.
- 191 Maeda Y, Matzel K, Lundby L, Buntzen S, Laurberg S. Postoperative issues of sacral nerve stimulation for fecal incontinence and constipation: a systematic literature review and treatment guidelines. *Dis Colon Rectum*. 2011;54(11):1443-60. Available from: <https://dx.doi.org/10.1097/DCR.0b013e318227f65d>.
- 192 Mahran A, Soriano A, Safwat AS, Hijaz A, Mahajan ST, Trabuco EC, et al. The effect of sacral neuromodulation on pregnancy: a systematic review. *Int Urogynecol J Pelvic Floor Dysfunct*. 2017;28(9):1357-65. Available from: <https://ovidsp.ovid.com/ovidweb.cgi?T=JS&CSC=Y&NEWS=N&PAGE=fulltext&D=medc&AN=28160010http://library.ncl.ac.uk/openurl/?sid=OVID&isbn=&issn=0937-3462&volume=28&issue=9&date=2017&title=International+Urogynecology+Journal&atitle=The+effect+of+sacral+neuromodulation> <https://dx.doi.org/10.1007/s00192-017-3272-0>.
- 193 Shah ED, Farida JD, Menees S, Baker JR, Chey WD. Examining Balloon Expulsion Testing as an Office-Based, Screening Test for Dyssynergic Defecation: A Systematic Review and Meta-Analysis. *American Journal of Gastroenterology*. 2018;113(11):1613-20. Available from: <http://dx.doi.org/10.1038/s41395-018-0230-5>.
- 194 Van Geluwe B, Stuto A, Da Pozzo F, Fieuws S, Meurette G, Lehur PA, et al. Relief of obstructed defecation syndrome after stapled transanal rectal resection (STARR): a meta-analysis. *Acta chirurgica Belgica*. 2014;114(3):189-97. Available from.
- 195 Beaudry-Bellefeuille I, Booth D, Lane SJ. Defecation-Specific Behavior in Children with Functional Defecation Issues: A Systematic Review. *Perm J*. 2017;21:17-047. Available from: <https://dx.doi.org/10.7812/TPP/17-047>.
- 196 Fante JF, Silva TD, Mateus-Vasconcelos ECL, Ferreira CHJ, Brito LGO. Do Women have Adequate Knowledge about Pelvic Floor Dysfunctions? A Systematic Review. *Rev Bras Ginecol Obstet*. 2019;41(8):508-19. Available from: <https://dx.doi.org/10.1055/s-0039-1695002>.
- 197 Heywood N, Holloway S. Risk factors for incontinence-associated dermatitis: An evidence-based review. *Wounds UK*. 2014;10(4):22-33. Available from.
- 198 Krol R, Smeenk RJ, van Lin EN, Yeoh EE, Hopman WP. Systematic review: anal and rectal changes after radiotherapy for prostate cancer. *Int J Colorectal Dis*. 2014;29(3):273-83. Available from: <https://dx.doi.org/10.1007/s00384-013-1784-8>.
- 199 Gouvas N, Georgiou PA, Agalinos C, Tan E, Tekkis P, Dervenis C, et al. Ventral colpoproctopexy for overt rectal prolapse and obstructed defaecation syndrome: a systematic review. *Colorectal Dis*. 2015;17(2):O34-46. Available from: <https://dx.doi.org/10.1111/codi.12751>.
- 200 Koudounas S, Bader DL, Voegel D. Knowledge Gaps in the Etiology and Pathophysiology of Incontinence-Associated Dermatitis: A Scoping Review. *Journal of Wound, Ostomy & Continence Nursing*. 2020;47(4):388-95. Available from: [10.1097/WON.0000000000000656](https://doi.org/10.1097/WON.0000000000000656).
- 201 Hintringer K, Wild C. *Colon hydrotherapy for defecation disorders*. Systematic Review. Austria: Ludwig Boltzmann Institut fuer Health Technology Assessment (LBI-HTA); 2009. Available from:
- 202 Hodgkinson B, Tuckett A, Hegney D, Paterson J, Kralik D. Effectiveness of educational interventions to raise men's awareness of bladder and bowel health. *JBI Libr Syst Rev*. 2010;8(30):1202-41. Available from.
- 203 Mowat A, Maher D, Baessler K, Christmann-Schmid C, Haya N, Maher C. Surgery for women with posterior compartment prolapse. 2018.

- 204 Boyle R, Hay-Smith EJ, Cody JD, Morkved S. Pelvic floor muscle training for prevention and treatment of urinary and faecal incontinence in antenatal and postnatal women. *Cochrane Database Syst Rev.* 2012(10):CD007471. Available from: <https://dx.doi.org/10.1002/14651858.CD007471.pub2>.
- 205 Woodley SJ, Boyle R, Cody JD, Morkved S, Hay-Smith EJC. Pelvic floor muscle training for prevention and treatment of urinary and faecal incontinence in antenatal and postnatal women. *Cochrane Database Syst Rev.* 2017(12):CD007471. Available from: <https://dx.doi.org/10.1002/14651858.CD007471.pub3>.
- 206 Brazzelli M, Griffiths P. Behavioural and cognitive interventions with or without other treatments for the management of faecal incontinence in children. *Cochrane Database Syst Rev.* 2006(2):CD002240. Available from.
- 207 Norton C, Cody JD, Hosker G. Biofeedback and/or sphincter exercises for the treatment of faecal incontinence in adults. *Cochrane Database Syst Rev.* 2006(3):CD002111. Available from.
- 208 Norton C, Hosker G, Brazzelli M. Biofeedback and/or sphincter exercises for the treatment of faecal incontinence in adults. *Cochrane Database Syst Rev.* 2000(2):CD002111. Available from.
- 209 Cheetham M, Brazzelli M, Norton C, Glazener CM. Drug treatment for faecal incontinence in adults. *Cochrane Database Syst Rev.* 2003(3):CD002116. Available from.
- 210 Hosker G, Norton C, Brazzelli M. Electrical stimulation for faecal incontinence in adults. *Cochrane Database Syst Rev.* 2000(2):CD001310. Available from.
- 211 Hay-Smith J, Morkved S, Fairbrother KA, Herbison GP. Pelvic floor muscle training for prevention and treatment of urinary and faecal incontinence in antenatal and postnatal women. *Cochrane Database Syst Rev.* 2008(4):CD007471. Available from: <https://dx.doi.org/10.1002/14651858.CD007471>.
- 212 Maeda Y, Laurberg S, Norton C. Perianal injectable bulking agents as treatment for faecal incontinence in adults. *Cochrane Database Syst Rev.* 2010(5):CD007959. Available from: <https://dx.doi.org/10.1002/14651858.CD007959.pub2>.
- 213 Deutekom M, Dobben A. Plugs for containing faecal incontinence. *Cochrane Database Syst Rev.* 2005(3):CD005086. Available from.
- 214 Deutekom M, Dobben AC. Plugs for containing faecal incontinence. *Cochrane Database Syst Rev.* 2012(4):CD005086. Available from: <https://dx.doi.org/10.1002/14651858.CD005086.pub3>.
- 215 Coggrave M, Norton C. Management of faecal incontinence and constipation in adults with central neurological diseases. *Cochrane Database Syst Rev.* 2013(12):CD002115. Available from: <https://dx.doi.org/10.1002/14651858.CD002115.pub4>.
- 216 Coggrave M, Wiesel PH, Norton C. Management of faecal incontinence and constipation in adults with central neurological diseases. *Cochrane Database Syst Rev.* 2006(2):CD002115. Available from.
- 217 Wiesel PH, Norton C, Brazzelli M. Management of faecal incontinence and constipation in adults with central neurological diseases. *Cochrane Database Syst Rev.* 2001(4):CD002115. Available from.
- 218 Tou S, Brown SR, Malik AI, Nelson RL. Surgery for complete rectal prolapse in adults. *Cochrane Database Syst Rev.* 2008(4):CD001758. Available from: <https://dx.doi.org/10.1002/14651858.CD001758.pub2>.
- 219 Bachoo P, Brazzelli M, Grant A. Surgery for faecal incontinence in adults. *Cochrane Database Syst Rev.* 2000(2):CD001757. Available from.
- 220 Brown SR, Nelson RL. Surgery for faecal incontinence in adults. *Cochrane Database Syst Rev.* 2007(2):CD001757. Available from.
- 221 Brown SR, Wadhawan H, Nelson RL. Surgery for faecal incontinence in adults. *Cochrane Database Syst Rev.* 2010(9):CD001757. Available from: <https://dx.doi.org/10.1002/14651858.CD001757.pub3>.
- 222 Mowatt G, Glazener C, Jarrett M. Sacral nerve stimulation for fecal incontinence and constipation in adults: a short version Cochrane review. *Neurorol Urodyn.* 2008;27(3):155-61. Available from: <https://dx.doi.org/10.1002/nau.20565>.
- 223 Hay-Smith J, Herbison P, Morkved S. Physical therapies for prevention of urinary and faecal incontinence in adults. *Cochrane Database Syst Rev.* 2002(2):CD003191. Available from.
- 224 Mowatt G, Glazener C, Jarrett M. Sacral nerve stimulation for faecal incontinence and constipation in adults. *Cochrane Database Syst Rev.* 2007(3):CD004464. Available from: <http://dx.doi.org/10.1002/14651858.CD004464.pub2>.
- 225 Brazzelli M, Griffiths P. Behavioural and cognitive interventions with or without other treatments for defaecation disorders in children. *Cochrane Database Syst Rev.* 2001(4):CD002240. Available from.
- 226 Maher C, Feiner B, Baessler K, Schmid C. Surgical management of pelvic organ prolapse in women. *Cochrane Database of Systematic Reviews.* 2013;2013 (4) (no pagination)(CD004014). Available from: <http://as.wiley.com/WileyCDA/Brand/id-6.htmlhttps://ovidsp.ovid.com/ovidweb.cgi?T=JS&CSC=Y&NEWS=N&PAGE=fulltext&D=emed14&AN=620559568>  
<http://library.ncl.ac.uk/openurl/?sid=OVID&isbn=&issn=1469-493X&volume=2013&issue=4&date=2013&title=Cochrane+Database+of+S>  
<http://dx.doi.org/10.1002/14651858.CD004014.pub5>.
- 227 Turawa EB, Musekiwa A, Rohwer AC. Interventions for preventing postpartum constipation. *Cochrane Database Syst Rev.* 2015(9):CD011625. Available from: <https://dx.doi.org/10.1002/14651858.CD011625.pub2>.

- 228 Gordon M, Naidoo K, Akobeng AK, Thomas AG. Osmotic and stimulant laxatives for the management of childhood constipation. *Cochrane Database Syst Rev*. 2012(7):CD009118. Available from: <https://dx.doi.org/10.1002/14651858.CD009118.pub2>.
- 229 Bachoo P, Brazzelli M, Grant A. Surgery for complete rectal prolapse in adults. *Cochrane Database Syst Rev*. 2000(2):CD001758. Available from.
- 230 Committee MSA. *Placement of artificial bowel sphincters in the management of faecal incontinence: assessment report*. Australia: Medical Services Advisory Committee (MSAC); 2003. Available from:
- 231 Beeson T, Eifrid B, Pike CA, Pittman J. Do Intra-anal Bowel Management Devices Reduce Incontinence-Associated Dermatitis and/or Pressure Injuries? *Journal of Wound, Ostomy & Continence Nursing*. 2017;44(6):583-8. Available from: 10.1097/WON.0000000000000381.
- 232 Abhyankar A, Carcani-Rathwell I, Clayden G. Constipation in children. *Clin Evid (Online)*. 2006;01:01. Available from.
- 233 Assessment Cfnht. *Transanal radiofrequency treatment of fecal incontinence*. Korea: Committee for New Health Technology Assessment (CNHTA); 2011. Available from: <http://nhta.neca.re.kr/nhta/eng/nhtaEng0601V.ecg>.
- 234 Bisset AF. *Artificial anal sphincter for faecal incontinence*. England: Wessex Institute for Health Research and Development (WIHRD); 2004. Available from:
- 235 Hayes I. *Secca (Mederi Therapeutics Inc.) procedure for fecal incontinence*. United States: HAYES, Inc.; 2010. Available from:
- 236 Hayes, Inc. *Peristeen anal irrigation system (Coloplast) for bowel management in pediatric populations*. United States: HAYES, Inc.; 2016. Available from:
- 237 Hayes I. *Artificial anal sphincter for fecal incontinence*. United States: HAYES, Inc.; 2008. Available from:
- 238 Hayes. *Staged approach to sacral nerve stimulation for treatment of fecal incontinence*. United States: HAYES, Inc.; 2015. Available from:
- 239 Rodríguez B, García Martí S, Pichon-Riviere A, Augustovski F, Alcaraz A, Bardach A, et al. *Biofeedback for women with urinary, fecal or combined incontinence*. Argentina: Institute for Clinical Effectiveness and Health Policy (IECS); 2017. Available from: [www.iecs.org.ar](http://www.iecs.org.ar).
- 240 Morais MB, Maffei HV. Constipation. *J Pediatr (Rio J)*. 2000;76 Suppl 1:S147-56. Available from.
- 241 Gonzalez L, Augustovski F, Pichon-Riviere A, García Martí S, Alcaraz A, Bardach A, et al. *Endoscopic radiofrequency ablation (Secca Procedure) for the treatment of fecal incontinence*. Argentina: Institute for Clinical Effectiveness and Health Policy (IECS); 2016. Available from:
- 242 Kline RM. Children who soil: A meta-analysis review. *Dissertation Abstracts International: Section B: The Sciences and Engineering*. 1999;60(4-B):1907. Available from.
- 243 Nandivada P, Nagle D. Surgical therapies for fecal incontinence. *Current Opinion in Gastroenterology*. 2014;30(1):69-74. Available from: <http://dx.doi.org/10.1097/MOG.0000000000000029>.
- 244 Tod AM, Stringer E, Levery C, Dean J, Brown J. Continence nursing. Rectal irrigation in the management of functional bowel disorders: a review. *British Journal of Nursing*. 2007;16(14):858-64. Available from.
- 245 [Hebrew] לרוין ע, רחל כ. פיזיותרפיה לטיפול בהפרעות על רקע פעילות יתר בשרירי רצפת האגן - סקירת ספרות שיטתית Physiotherapy for the treatment of disorders due to overactivity of the pelvic floor muscles - a systematic literature review. *Journal of the Israeli Physical Therapy Society (JIPTS)*. 2019;21(1):48-64. Available from: <http://search.ebscohost.com/login.aspx?direct=true&db=cin20&AN=137870132&site=ehost-live>.
- 246 Medical Technology Unit - Swiss Federal Office of Public Health. *Sacral nerve stimulation in the treatment of defecation disorders*. Switzerland: Swiss Federal Office of Public Health (FOPH); 2001. Available from:
- 247 Ilnat P, Vavra P, Gunkova P, Pelikan A, Zonca P. 3D high resolution anorectal manometry in functional anorectal evaluation. *Rozhl Chir*. 2014;93(11):524-9. Available from.
- 248 Lapointe A, Brophy J. *Sacral nerve stimulation in fecal incontinence*. Canada: Centre Hospitalier de l'Universite de Montreal(CHUM); 2007. Available from:
- 249 Hay-Smith J, Mørkved S, Herbison GP. Physical therapies for prevention of urinary and faecal incontinence in adults. *Cochrane Database of Systematic Reviews*. 2007(4). Available from: 10.1002/14651858.CD003191.pub2.
- 250 Ribeiro JU, Borges EL. An integrative review of the treatment of incontinence-associated dermatitis revisión. *Revista Estima*. 2010;8(1):30-9. Available from.
- 251 Dziechciarz P, Wojtyniak K, Horvath A, Szajewska H. Enema versus polyethylene glycol for the management of rectal faecal impaction in children with constipation - a systematic review of randomised controlled trials. *Prz Gastroenterol*. 2015;10(4):234-8. Available from: <https://dx.doi.org/10.5114/pg.2015.52184>.
- 252 Lee MS, Choi TY, Park JE, Ernst E. Effects of moxibustion for constipation treatment: a systematic review of randomized controlled trials. *Chinese Medicine*. 2010;5:28. Available from.
- 253 Lu ML, He J, Lu S. Electrical stimulation therapy for slow transit constipation in children: a systematic review. *Int J Colorectal Dis*. 2015;30(5):697-702. Available from: <https://dx.doi.org/10.1007/s00384-015-2180-3>.
- 254 Soares NC, Ford AC. Systematic review: the effects of fibre in the management of chronic idiopathic constipation. *Alimentary Pharmacology and Therapeutics*. 2011;33(8):895-901. Available from.
- 255 Moore D, Young CJ. A systematic review and meta-analysis of biofeedback therapy for dyssynergic defaecation in adults. *Tech Coloproctol*. 2020;Epub ahead of print. Available from.
- 256 Miles CL, Fellowes D, Goodman ML, Wilkinson S. Laxatives for the management of constipation in palliative care patients. *Cochrane Database Syst Rev*. 2006(4):CD003448. Available from.



- 257 Aboumarzouk OM, Agarwal T, Antakia R, Shariff U, Nelson RL. Cisapride for intestinal constipation. *Cochrane Database Syst Rev*. 2011(1):CD007780. Available from: <https://dx.doi.org/10.1002/14651858.CD007780.pub2>.
- 258 Cheng CW, Bian ZX, Wu TX. Systematic review of Chinese herbal medicine for functional constipation. *World Journal of Gastroenterology*. 2009;15(39):4886-95. Available from.
- 259 Chmielewska A, Szajewska H. Systematic review of randomised controlled trials: probiotics for functional constipation. *World J Gastroenterol*. 2010;16(1):69-75. Available from.
- 260 Lim SF, Childs C. A systematic review of the effectiveness of bowel management strategies for constipation in adults with stroke. *Int J Nurs Stud*. 2013;50(7):1004-10. Available from: <https://dx.doi.org/10.1016/j.ijnurstu.2012.12.002>.
- 261 Su-fee L, Childs C. Effectiveness of Non-Surgical Management Strategies for Constipation in Adults with Stroke: A Systematic Review. *JBI Library of Systematic Reviews*. 2010;8:1-26. Available from: 10.11124/jbisrir-2010-637.
- 262 Pijpers MA, Tabbers MM, Benninga MA, Berger MY. Currently recommended treatments of childhood constipation are not evidence based: a systematic literature review on the effect of laxative treatment and dietary measures. *Archives of Disease in Childhood*. 2009;94(2):117-31. Available from.
- 263 Woodward S, Norton C, Chiarelli P. Biofeedback for treatment of chronic idiopathic constipation in adults. *Cochrane Database Syst Rev*. 2014(3):CD008486. Available from: <https://dx.doi.org/10.1002/14651858.CD008486.pub2>.
- 264 Dahl WJ, Mendoza DR. Is Fibre an Effective Strategy to Improve Laxation in Long-Term Care Residents? *Can J Diet Pract Res*. 2018;79(1):35-41. Available from: <https://dx.doi.org/10.3148/cjdp-2017-028>.
- 265 Fleming V, Wade WE. A review of laxative therapies for treatment of chronic constipation in older adults. *Am J Geriatr Pharmacother*. 2010;8(6):514-50. Available from: [https://dx.doi.org/10.1016/S1543-5946\(10\)80003-0](https://dx.doi.org/10.1016/S1543-5946(10)80003-0).
- 266 Ernst E, Resch KL. A meta-analysis of biofeedback treatment for anismus. *European Journal of Physical Medicine and Rehabilitation*. 1995;5(5):157-9. Available from.
- 267 Robertson J, Baines S, Emerson E, Hatton C. Constipation management in people with intellectual disability: A systematic review. *J Appl Res Intellect Disabil*. 2018;31(5):709-24. Available from: <https://dx.doi.org/10.1111/jar.12426>.
- 268 Vilanova-Sanchez A, Gasior AC, Toocheck N, Weaver L, Wood RJ, Reck CA, et al. Are Senna based laxatives safe when used as long term treatment for constipation in children? *J Pediatr Surg*. 2018;53(4):722-27. Available from.
- 269 Wang L, Xu M, Zheng Q, Zhang W, Li Y. The Effectiveness of Acupuncture in Management of Functional Constipation: A Systematic Review and Meta-Analysis. *Evid Based Complement Alternat Med*. 2020;2020:6137450. Available from: <https://dx.doi.org/10.1155/2020/6137450>.
- 270 Yong H, Lei Z, Xiang-Qun L, Zhi-Jun Z, Lu-Xian L, Han Y, et al. Effect of glucomannan on functional constipation in children: a systematic review and meta-analysis of randomised controlled trials. *Asia Pacific Journal of Clinical Nutrition*. 2017;26(3):471-7. Available from: 10.6133/apjcn.032016.03.
- 271 Oczkowski SJW, Duan EH, Cook DJ, Groen A, Warren D. The Use of Bowel Protocols in Critically Ill Adult Patients: A Systematic Review and Meta-Analysis. *Critical Care Medicine*. 2017;45(7):e718-e26. Available from: 10.1097/CCM.0000000000002315.
- 272 Zhang T, Chon TY, Liu B, Do A, Li G, Bauer B, et al. Efficacy of acupuncture for chronic constipation: a systematic review. *American Journal of Chinese Medicine*. 2013;41(4):717-42. Available from.
- 273 Siminas S, Losty PD. Current Surgical Management of Pediatric Idiopathic Constipation: A Systematic Review of Published Studies. *Ann Surg*. 2015;262(6):925-33. Available from: <https://dx.doi.org/10.1097/SLA.0000000000001191>.
- 274 Dimidi E, Christodoulides S, Fragkos KC, Scott SM, Whelan K. The effect of probiotics on functional constipation in adults: a systematic review and meta-analysis of randomized controlled trials. *Am J Clin Nutr*. 2014;100(4):1075-84. Available from: <https://dx.doi.org/10.3945/ajcn.114.089151>.
- 275 Thomas GP, Dudding TC, Rahbour G, Nicholls RJ, Vaizey CJ. Sacral nerve stimulation for constipation. *British Journal of Surgery*. 2013;100(2):174-81. Available from.
- 276 Chase J, Shields N. A systematic review of the efficacy of non-pharmacological, non-surgical and non-behavioural treatments of functional chronic constipation in children. *Australian & New Zealand Continence Journal*. 2011;17(2):40-50. Available from.
- 277 Huang R, Hu J. Positive Effect of Probiotics on Constipation in Children: A Systematic Review and Meta-Analysis of Six Randomized Controlled Trials. *Front Cell Infect Microbiol*. 2017;7:153. Available from: <https://dx.doi.org/10.3389/fcimb.2017.00153>.
- 278 Tabbers MM, Boluyt N, Berger MY, Benninga MA. Nonpharmacologic treatments for childhood constipation: systematic review. *Pediatrics*. 2011;128(4):753-61. Available from: <https://dx.doi.org/10.1542/peds.2011-0179>.
- 279 Gordon M, MacDonald JK, Parker CE, Akobeng AK, Thomas AG. Osmotic and stimulant laxatives for the management of childhood constipation. *Cochrane Database Syst Rev*. 2016(8):CD009118. Available from: <https://dx.doi.org/10.1002/14651858.CD009118.pub3>.
- 280 Vande Velde S, Van Renterghem K, Van Winkel M, De Bruyne R, Van Biervliet S. Constipation and fecal incontinence in children with cerebral palsy. Overview of literature and flowchart for a stepwise approach. *Acta Gastroenterol Belg*. 2018;81(3):415-8. Available from.
- 281 Price KJ, Elliot TM. Stimulant laxatives for constipation and soiling in children. *Cochrane Database of Systematic Reviews*. 2001(3). Available from: 10.1002/14651858.CD002040.

- 282 Reuchlin-Vroklage LM, Bierma-Zeinstra S, Benninga MA, Berger MY. Diagnostic value of abdominal radiography in constipated children: a systematic review. *Archives of Pediatrics and Adolescent Medicine*. 2005;159(7):671-8. Available from.
- 283 Hurdon V, Viola R, Schroder C. How useful is docusate in patients at risk for constipation: a systematic review of the evidence in the chronically ill. *Journal of Pain and Symptom Management*. 2000;19(2):130-6. Available from.
- 284 Ford AC, Suares NC. Effect of laxatives and pharmacological therapies in chronic idiopathic constipation: systematic review and meta-analysis. *Gut*. 2011;60(2):209-18. Available from.
- 285 Wang Q-S, Liu Y, Zou X-N, Ma Y-L, Liu G-L. Evaluating the Efficacy of Massage Intervention for the Treatment of Poststroke Constipation: A Meta-Analysis. *Evidence-based Complementary & Alternative Medicine (eCAM)*. 2020;1-8. Available from: 10.1155/2020/8934751.
- 286 Price KJ, Elliott TM. What is the role of stimulant laxatives in the management of childhood constipation and soiling? *Cochrane Database Syst Rev*. 2001(3):CD002040. Available from.
- 287 Hartmann K, Viswanathan M, Palmieri R, Gartlehner G, Thorp J, Jr., Lohr KN. Outcomes of routine episiotomy: a systematic review. *Jama*. 2005;293(17):2141-8. Available from.
- 288 Jacob TJ, Perakath B, Keighley MR. Surgical intervention for anorectal fistula. *Cochrane Database Syst Rev*. 2010(5):CD006319. Available from: <https://dx.doi.org/10.1002/14651858.CD006319.pub2>.
- 289 Koh CE, Young CJ, Solomon MJ. Systematic review of randomized controlled trials of the effectiveness of biofeedback for pelvic floor dysfunction. *British Journal of Surgery*. 2008;95(9):1079-87. Available from.
- 290 Avery KN, Bosch JL, Gotoh M, Naughton M, Jackson S, Radley SC, et al. Questionnaires to assess urinary and anal incontinence: review and recommendations. *J Urol*. 2007;177(1):39-49. Available from.
- 291 Arkel E, Torell K, Rydhog S, Rikner A, Neymark Bachmeier H, Gutke A, et al. Effects of physiotherapy treatment for patients with obstetric anal sphincter rupture: a systematic review. *European Journal of Physiotherapy*. 2017;19(2):90-6. Available from: <http://dx.doi.org/10.1080/21679169.2016.1263872>.
- 292 Lim YSL, Carville K. Prevention and Management of Incontinence-Associated Dermatitis in the Pediatric Population: An Integrative Review. *J Wound Ostomy Continence Nurs*. 2019;46(1):30-7. Available from: <https://dx.doi.org/10.1097/WON.0000000000000490>.
- 293 Lai X, Wong FKY, Ching SSY. Review of bowel dysfunction of rectal cancer patients during the first five years after sphincter-preserving surgery: A population in need of nursing attention. *European Journal of Oncology Nursing*. 2013;17(5):681-92. Available from: 10.1016/j.ejon.2013.06.001.
- 294 Nelson RL, Westercamp M, Furner SE. A systematic review of the efficacy of cesarean section in the preservation of anal continence. *Dis Colon Rectum*. 2006;49(10):1587-95. Available from.
- 295 Turawa EB, Musekiwa A, Rohwer AC. Interventions for preventing postpartum constipation. *Cochrane Database of Systematic Reviews*. 2020(8). Available from: <http://dx.doi.org/10.1002/14651858.CD011625.pub3>
- 296 Visser WS, Te Riele WW, Boerma D, van Ramshorst B, van Westreenen HL. Pelvic floor rehabilitation to improve functional outcome after a low anterior resection: a systematic review. *Annals of Coloproctology*. 2014;30(3):109-14. Available from: <https://dx.doi.org/10.3393/ac.2014.30.3.109>.
- 297 Keane C, Wells C, O'Grady G, Bissett IP. Defining low anterior resection syndrome: a systematic review of the literature. *Colorectal Dis*. 2017;19(8):713-22. Available from: <https://dx.doi.org/10.1111/codi.13767>.
- 298 Linedale EC, Mikocka-Walus A, Gibson PR, Andrews JM. The Potential of Integrated Nurse-Led Models to Improve Care for People With Functional Gastrointestinal Disorders: A Systematic Review. *Gastroenterol Nurs*. 2020;43(1):53-64. Available from: <https://dx.doi.org/10.1097/SGA.0000000000000379>.
- 299 Sajid MS, Siddiqui MR, Baig MK. Open vs laparoscopic repair of full-thickness rectal prolapse: a re-meta-analysis. *Colorectal Disease*. 2010;12(6):515-25. Available from.
- 300 Faucheron JL, Trilling B, Girard E, Sage PY, Barbois S, Reche F. Anterior rectopexy for full-thickness rectal prolapse: Technical and functional results. *World J Gastroenterol*. 2015;21(16):5049-55. Available from: <https://dx.doi.org/10.3748/wjg.v21.i16.5049>.
- 301 Hodgkinson B, Josephs K, Leira E, Synnott R, Hegney D. A systematic review of the effect of educational interventions for urinary and faecal incontinence by health care staff/carers/clients in aged care, on level of knowledge, frequency of incontinence episodes and hours spent on the management of incontinence episodes. *JBI Libr Syst Rev*. 2008;6(1):1-66. Available from.
- 302 Flanagan L, Roe B, Jack B, Barrett J, Chung A, Shaw C, et al. Systematic review of care intervention studies for the management of incontinence and promotion of continence in older people in care homes with urinary incontinence as the primary focus (1966-2010). *Geriatr Gerontol Int*. 2012;12(4):600-11. Available from: <https://dx.doi.org/10.1111/j.1447-0594.2012.00875.x>.
- 303 Coulter ID, Favreau JT, Hardy ML, Morton SC, Roth EA, Shekelle P. Biofeedback interventions for gastrointestinal conditions: a systematic review. *Altern Ther Health Med*. 2002;8(3):76-83. Available from.
- 304 Boyle R, Hay-Smith EJ, Cody JD, Morkved S. Pelvic floor muscle training for prevention and treatment of urinary and fecal incontinence in antenatal and postnatal women: a short version Cochrane review. *Neurourology Urodyn*. 2014;33(3):269-76. Available from: <https://dx.doi.org/10.1002/nau.22402>.

- 305 Yeung J, Jones A, Jhangri GS, Gibson W, Hunter KF, Wagg A. Toileting Disability in Older People Residing in Long-term Care or Assisted Living Facilities: A Scoping Review of the Literature. *Journal of Wound, Ostomy & Continence Nursing*. 2019;46(5):424-33. Available from: 10.1097/WON.0000000000000575.
- 306 Morita T, Godfrey S, George CM. Systematic review of evidence on the effectiveness of safe child faeces disposal interventions. *Trop Med Int Health*. 2016;21(11):1403-19. Available from.
- 307 Shamliyan TA, Bliss DZ, Du J, Ping R, Wilt TJ, Kane RL. Prevalence and risk factors of fecal incontinence in community-dwelling men. *Rev Gastroenterol Disord*. 2009;9(4):E97-110. Available from.
- 308 Dupuis O, Madelenat P, Rudigoz RC. Fecal and urinary incontinence after delivery: risk factors and prevention. *Gynecol Obstet Fertil*. 2004;32(6):540-8. Available from.
- 309 Falloon SS, Abbas S, Stridfeldt C, Cottenden A. The Impact of Microclimate on Skin Health With Absorbent Incontinence Product Use. *Journal of Wound, Ostomy & Continence Nursing*. 2018;45(4):341-8. Available from: 10.1097/WON.0000000000000449.
- 310 Gordon M, Naidoo K, Akobeng AK, Thomas AG. Cochrane Review: Osmotic and stimulant laxatives for the management of childhood constipation (Review). *Evid Based Child Health*. 2013;8(1):57-109. Available from: <https://dx.doi.org/10.1002/ebch.1893>.
- 311 Kersting S, Jung KP, Berg E. Alloplastic material in prolapse surgery: Indications and postoperative outcome of ventral rectopexy. *Chirurg*. 2017;88(2):141-6. Available from: <https://dx.doi.org/10.1007/s00104-016-0264-4>.
- 312 Cook TA, Brading AF, Mortensen NJM. Review article: The pharmacology of the internal anal sphincter and new treatments of ano-rectal disorders. *Alimentary Pharmacology and Therapeutics*. 2001;15(7):887-98. Available from: <http://dx.doi.org/10.1046/j.1365-2036.2001.00995.x>.
- 313 Schlomer G, Gross M, Meyer G. Effectiveness of liberal vs. conservative episiotomy in vaginal delivery with reference to preventing urinary and fecal incontinence: a systematic review. *Wien Med Wochenschr*. 2003;153(11-12):269-75. Available from.
- 314 Konno R. Assessment of faecal incontinence in older community-dwelling adults. *Journal of Advanced Nursing* 2009;65(4):774-6. Available from.
- 315 Gordon M, Naidoo K, Akobeng AK, Thomas AG. Osmotic and stimulant laxatives for the management of childhood constipation. *Evidence-Based Child Health*. 2013;8(1):57-109. Available from.
- 316 Probst M, Pages H, Riemann JF, Eickhoff A, Raulf F, Kolbert G. Fecal incontinence: Part 4 of a series of articles on incontinence. [German, English]. *Deutsches Arzteblatt*. 2010;107(34-35):596-601. Available from: <http://dx.doi.org/10.3238/arztebl.2010.0596>.
- 317 Medical Services Advisory C. *Placement of artificial bowel sphincters in the management of faecal incontinence*. Australia: Medical Services Advisory Committee (MSAC); 1999. Available from:
- 318 Chapman AE, Hewett P, Kiroff G, Maddern GJ, Geerdes B, Evers T, et al. *A systematic review of dynamic graciloplasty for the treatment of faecal incontinence*. Australia: Australian Safety and Efficacy Register of New Interventional Procedures -Surgical (ASERNIP-S); 2001. Available from:
- 319 Fallon A, Westaway J, Moloney C. A systematic review of psychometric evidence and expert opinion regarding the assessment of faecal incontinence in older community-dwelling adults. *JBI Libr Syst Rev*. 2008;6(11):367-431. Available from.
- 320 Sarveazad AB, A. Amini, N. Shamseddin, J. Yousefifard, M. Posterior tibial nerve stimulation in fecal incontinence: A systematic review and meta-analysis. *Basic Clin Neurosci*. 2019;10(5):419-31. Available from.
- 321 Ma JZ, Liu SN, Wu TX, Shi L. Efficacy of Chinese herbal medicines in treating chronic functional constipation: a systematic review. *Chinese Journal of Evidence-Based Medicine*. 2010;10(10):1213-21. Available from.
- 322 Cour F, Le Normand L, Meurette G. Vaginal surgery and transanal approach for posterior vaginal wall prolapse: Guidelines for clinical practice. *Prog Urol*. 2016;26 Suppl 1:S47-60. Available from: [https://dx.doi.org/10.1016/S1166-7087\(16\)30428-6](https://dx.doi.org/10.1016/S1166-7087(16)30428-6).
- 323 Korenkov M, Junginger T. Rectal prolapse in adults--causes, diagnostic, treatment. *Zentralbl Chir*. 2005;130(6):544-9. Available from.
- 324 Zhu L, Liang WQ, Huang X. Anorectal manometry and efficiency of functional incontinence treated by biofeedback. [Chinese]. *Chinese Journal of Clinical Rehabilitation*. 2005;9(36):80-1. Available from: <https://ovidsp.ovid.com/ovidweb.cgi?T=JS&CSC=Y&NEWS=N&PAGE=fulltext&D=emed9&AN=43154053http://library.ncl.ac.uk/openurl/?sid=OVID&isbn=&issn=1671-5926&volume=9&issue=36&date=2005&title=Chinese+Journal+of+Clinical+Rehabilitation&atitle=Anorectal+manometry+>.
- 325 Yang T, Jiang Q, Yu H, Niu N, Wei M. Risk factors of incontinence-associated dermatitis in critically ill patients: a meta-analysis. *Chin Nurs Res*. 2019;33(20):3478-83. Available from.
- 326 Unknown. Management of constipation in older adults. *Best Practice*. 2008;12(7):1-4. Available from.
- 327 Banaszkievicz A, Szajewska H. Probiotics in the treatment of constipation: A systematic review of randomized controlled trials. [Polish]. *Pediatrics Wspolczesna*. 2005;7(1):9-14. Available from.
- 328 Yue YS, Xie B, Cheng J, Zhang WY, Zhu Y. Electrical stimulation therapy for neurogenic bowel dysfunction after spinal injury. [Chinese]. *World Chinese Journal of Digestology*. 2013;21(7):633-40. Available from: <http://dx.doi.org/10.11569/wcjd.v21.i7.633>.

- 329 Villot A, Deffieux X, Demoulin G, Rivain AL, Trichot C, Thubert T. Management of postpartum anal incontinence: A systematic review. *Prog Urol.* 2015;25(17):1191-203. Available from: <https://dx.doi.org/10.1016/j.purol.2015.06.002>.
- 330 林采蓉, 黃敏瑢, 粘惠先, 劉佳琪, 謝佩珊, 陳淑惠. 降低重症病房腹瀉病人失禁性皮膚炎發生率 [Chinese] Reduce the incidence of incontinent dermatitis in patients with diarrhea in the intensive care unit. *Journal of Nursing.* 2015;62(6):81-9. Available from: <http://search.ebscohost.com/login.aspx?direct=true&db=cin20&AN=111491866&site=ehost-live> 10.6224/JN.62.6.81.
- 331 Wu TJ, Lin CC, Wang HH. The Effectiveness of Abdominal Massage on Neurogenic Bowel Dysfunction in Patients With Spinal Cord Injury: A Systematic Review. *Hu Li Tsa Chih.* 2017;64(1):90-7. Available from: <https://dx.doi.org/10.6224/JN.64.1.90>.
- 332 Sánchez López MI. Nuevos dispositivos de derivación y colección fecal: efectos adversos descritos en la bibliografía [Spanish]. *Enfermería Intensiva.* 2014;25(1):4-14. Available from: 10.1016/j.enfi.2013.11.001.
- 333 Nelson RL, Go C, Darwish R, Gao J, Parikh R, Kang C, et al. Cesarean delivery to prevent anal incontinence: a systematic review and meta-analysis. *Tech Coloproctol.* 2019;23(9):809-20. Available from: <https://dx.doi.org/10.1007/s10151-019-02029-3>.
- 334 Pretlove SJ, Thompson PJ, Toozs-Hobson PM, Radley S, Khan KS. Does the mode of delivery predispose women to anal incontinence in the first year postpartum? A comparative systematic review. *BJOG an International Journal of Obstetrics & Gynaecology.* 2008;115(4):421-34. Available from: <https://dx.doi.org/10.1111/j.1471-0528.2007.01553.x>.
- 335 Schlomer G, Gross M, Meyer G. Effectiveness of liberal vs. restrictive episiotomy in reducing urinary and anal incontinence following vaginal delivery: A systematic review. [German]. *Wiener Medizinische Wochenschrift.* 2003;153(11-12):269-75. Available from.
- 336 Yang B, Lu P, Li MX, Cai XL, Xiong WY, Hou HJ, et al. A meta-analysis of the effects of probiotics and synbiotics in children with acute diarrhea. *Medicine (Baltimore).* 2019;98(37):e16618. Available from: <https://dx.doi.org/10.1097/MD.00000000000016618>.
- 337 Chen SL, Cai SR, Deng L, Zhang XH, Luo TD, Peng JJ, et al. Efficacy and complications of polyethylene glycols for treatment of constipation in children: A meta-analysis. *Medicine (United States).* 2014;93(16):e65. Available from: <http://dx.doi.org/10.1097/MD.0000000000000065>.
- 338 De Ligny WR, Kerkhof MH, Ruiz-Zapata AM. Regenerative medicine as a therapeutic option for fecal incontinence: a systematic review of preclinical and clinical studies. *Am J Obstet Gynecol.* 2019;220(2):142-54.e2. Available from: <https://dx.doi.org/10.1016/j.ajog.2018.09.009>.
- 339 Baessler K, Schuessler B. Childbirth-induced trauma to the urethral continence mechanism: review and recommendations. *Urology.* 2003;62(4 Suppl 1):39-44. Available from.
- 340 Nelson R. Cesarean section for the prevention of anal incontinence. *Cochrane Database of Systematic Reviews.* 2007;(4) (no pagination)(CD006756). Available from: <http://dx.doi.org/10.1002/14651858.CD006756>.
- 341 Nelson RL, Furner SE, Westercamp M, Farquhar C. Cesarean delivery for the prevention of anal incontinence. *Cochrane Database Syst Rev.* 2010(2):CD006756. Available from: <https://dx.doi.org/10.1002/14651858.CD006756.pub2>.



**Supplementary Appendix 7:** Includes systematic reviews/clinical trials by domain

| Parent code                                         | Child code                                                               | Systematic reviews |                                              | Horizon scanning |                                                   |
|-----------------------------------------------------|--------------------------------------------------------------------------|--------------------|----------------------------------------------|------------------|---------------------------------------------------|
|                                                     |                                                                          | n                  | References                                   | n                | References                                        |
| <b>Bowel management</b>                             |                                                                          |                    |                                              |                  |                                                   |
|                                                     | General                                                                  |                    |                                              |                  |                                                   |
|                                                     | Assistive techniques                                                     | 2                  | 1,2                                          | 5                | 3-7                                               |
|                                                     | Bowel habit/retraining                                                   |                    |                                              |                  |                                                   |
|                                                     | Complementary therapies                                                  | 5                  | 2,8-11                                       | 17               | 12-28                                             |
|                                                     | Dietary management                                                       | 10                 | 8,11,29-36                                   | 4                | 37-40                                             |
|                                                     | Education                                                                | 6                  | 1,34,41-44                                   | 6                | 45-50                                             |
|                                                     | Electrical stimulation                                                   | 23                 | 2,30,33,44,51-69                             | 13               | 20,21,70-80                                       |
|                                                     | Lifestyle                                                                | 6                  | 1,8,29,33,34,42                              | 9                | 38,46,48,49,81-85                                 |
|                                                     | Magnetic stimulation                                                     | 0                  |                                              | 3                | 70,86,87                                          |
|                                                     | Pelvic floor muscle training/<br>biofeedback/ sphincter<br>exercises     | 19                 | 1,29,33,34,44,53,56,67,88-<br>96             | 13               | 71,73,87,97-106                                   |
|                                                     | Physiotherapy                                                            | 0                  |                                              | 2                | 107,108                                           |
|                                                     | Psychological/ behavioural/<br>urgency suppression<br>techniques         | 2                  | 41,109                                       | 3                | 3,46,49                                           |
|                                                     | Self-management                                                          | 0                  |                                              | 4                | 3,45,46,49                                        |
|                                                     | Volumetric/breathing<br>exercises                                        | 1                  | 67                                           | 0                |                                                   |
|                                                     | Weight management                                                        | 0                  |                                              | 0                |                                                   |
| <b>Bowel management for neurological conditions</b> |                                                                          |                    |                                              |                  |                                                   |
|                                                     | Anticholinesterase plus an<br>anticholinergic drug                       | 1                  | 110                                          | 1                | 111                                               |
|                                                     | Assistive techniques                                                     | 7                  | 44,53,55,110,112-114                         | 2                | 115,116                                           |
|                                                     | Bowel programmes/ bowel<br>care                                          | 2                  | 55,110                                       | 1                | 117                                               |
|                                                     | Devices                                                                  | 0                  |                                              | 0                |                                                   |
|                                                     | Electrical stimulation                                                   | 0                  |                                              | 2                | 118,119                                           |
|                                                     | Fibre                                                                    | 1                  | 110                                          | 0                |                                                   |
|                                                     | Physiotherapy                                                            | 1                  | 53                                           | 5                | 85,120-123                                        |
|                                                     | Surgery                                                                  | 0                  |                                              | 5                | 124-128                                           |
| <b>Bowel and bladder dysfunction</b>                |                                                                          |                    |                                              |                  |                                                   |
|                                                     | Bladder pain syndrome                                                    | 0                  |                                              | 0                |                                                   |
|                                                     | Constipation (including in<br>children)                                  | 20                 | 8,9,11,31,36,54,66,68,91,109<br>,110,129-137 | 27               | 12,45,138-148 14-<br>17,19,23,24,27,28,72,149-153 |
|                                                     | FI and delayed toilet training<br>as a result of chronic<br>constipation | 0                  |                                              | 0                |                                                   |
|                                                     | FI in children                                                           | 3                  | 41,54,154                                    | 0                |                                                   |
|                                                     | Link between constipation<br>and urinary incontinence                    | 0                  |                                              | 0                |                                                   |
|                                                     | Urinary and/or FI                                                        | 10                 | 155-164                                      | 5                | 84,165-168                                        |
| <b>Drugs</b>                                        |                                                                          |                    |                                              |                  |                                                   |
|                                                     | General                                                                  | 0                  |                                              | 0                |                                                   |

|                       |                                                       |    |                                                 |    |                               |
|-----------------------|-------------------------------------------------------|----|-------------------------------------------------|----|-------------------------------|
|                       | Anti-diarrhoeal agents                                | 5  | 33,53,93,169,170                                | 0  |                               |
|                       | Botulinum toxin type A                                | 1  | 171                                             | 1  | 172                           |
|                       | Clonidine                                             | 3  | 44,53,170                                       | 0  |                               |
|                       | Drugs acting on anal sphincter tone                   | 2  | 53,169                                          | 0  |                               |
|                       | Enemas                                                | 5  | 34,129,134,154,173                              | 2  | 174,175                       |
|                       | Fibre                                                 | 2  | 44,53                                           | 0  |                               |
|                       | Laxatives                                             | 7  | 1,29,34,53,110,136,169                          | 8  | 15,20,140,143,144,147,152,153 |
|                       | Oestrogen therapy                                     | 2  | 53,176                                          | 0  |                               |
|                       | Pipeline drugs                                        | 0  |                                                 | 2  | 138,139                       |
|                       | Repurposed drugs                                      | 0  |                                                 | 11 | 21,24,141-147,177,178         |
|                       | Stool-forming agents                                  | 4  | 29,41,53,93                                     | 0  |                               |
|                       | Suppositories                                         | 0  |                                                 | 2  | 4,179                         |
| <b>Surgery</b>        |                                                       |    |                                                 |    |                               |
|                       | General                                               | 0  |                                                 | 0  |                               |
|                       | Antegrade irrigation                                  | 4  | 129,134,154,173                                 | 0  |                               |
|                       | Artificial anal sphincter                             | 6  | 44,53,62,180-182                                | 1  | 183                           |
|                       | Bariatric surgery                                     | 3  | 184-186                                         | 0  |                               |
|                       | Dynamic graciloplasty                                 | 2  | 180,187                                         | 0  |                               |
|                       | Gluteoplasty                                          | 1  | 180                                             | 0  |                               |
|                       | Injectable bulking agents                             | 10 | 44,53,180,188-193                               | 3  | 98,194,195                    |
|                       | Levatorplasty (anterior) - repairing the pelvic floor | 2  | 44,53                                           | 0  |                               |
|                       | Magnetic sphincter formation                          | 0  |                                                 | 1  | 196                           |
|                       | Microballoons                                         | 2  | 44,180                                          | 0  |                               |
|                       | Muscle transposition                                  | 3  | 53,180,197                                      | 0  |                               |
|                       | New surgical procedures                               | 0  |                                                 | 1  | 198                           |
|                       | Ostomies (colostomy and ileostomy)                    | 1  | 199                                             | 0  |                               |
|                       | Post anal repair                                      | 1  | 53                                              | 0  |                               |
|                       | Posterior tibial nerve stimulation                    | 0  |                                                 | 1  | 200                           |
|                       | Radiofrequency                                        | 2  | 53,180                                          | 1  | 201                           |
|                       | Repair of posterior compartment prolapse              | 2  | 202,203                                         | 0  |                               |
|                       | Repair of rectal prolapse                             | 7  | 44,62,204-208                                   | 2  | 151,209                       |
|                       | Sacral nerve stimulation (implanted)                  | 17 | 33,44,54,61,64,67,68,93,130,132,163,180,210-214 | 12 | 98,124,127,196,215-222        |
|                       | Slings                                                | 0  |                                                 | 0  |                               |
|                       | Sphincteroplasty                                      | 3  | 44,63,223                                       | 1  | 224                           |
|                       | Sphincter repair                                      | 4  | 53,63,197,225                                   | 0  |                               |
|                       | Stem cells                                            | 1  | 53                                              | 3  | 125,126,128                   |
|                       | Total pelvic floor repair (TPFR)                      | 1  | 53                                              | 0  |                               |
| <b>Models of care</b> |                                                       |    |                                                 |    |                               |
|                       | Clinical pathway to diagnosis                         | 0  |                                                 | 0  |                               |
|                       | Evidence-based practice                               | 0  |                                                 | 0  |                               |
|                       | General - models of care                              | 1  | 43                                              | 1  | 226                           |
|                       | GP                                                    | 0  |                                                 | 0  |                               |

|                                                                        |                                                               |   |                             |    |                                 |
|------------------------------------------------------------------------|---------------------------------------------------------------|---|-----------------------------|----|---------------------------------|
|                                                                        | Nurse led                                                     | 2 | 34,227                      | 0  |                                 |
|                                                                        | Transition of care                                            | 0 |                             | 0  |                                 |
| <b>Mechanical devices</b>                                              |                                                               |   |                             |    |                                 |
|                                                                        | Absorbent products                                            | 8 | 29,33,41,42,156,157,227,228 | 0  |                                 |
|                                                                        | Anal plugs                                                    | 3 | 33,229,230                  | 3  | 231-233                         |
|                                                                        | Anal pouch                                                    | 2 | 43,234                      | 0  |                                 |
|                                                                        | Commodes                                                      | 0 |                             | 2  | 166,168                         |
|                                                                        | Inserts (including vaginal inserts)                           | 1 | 229                         | 0  |                                 |
|                                                                        | Managing condition                                            | 0 |                             | 2  | 21,235                          |
|                                                                        | New devices (e.g. intra-rectal diversion devices)             | 1 | 227                         | 2  | 235,236                         |
|                                                                        | Rectal catheters (used for critically ill patients)           | 2 | 43,234                      | 1  | 237                             |
|                                                                        | Rectal trumpet (off-label use)                                | 1 | 227                         | 0  |                                 |
|                                                                        | Vaginal-bowel devices                                         | 0 |                             | 3  | 80,238,239                      |
| <b>Other containment/ non-active/ other in non-neurogenic patients</b> |                                                               |   |                             |    |                                 |
|                                                                        | Toileting assistance programmes                               | 2 | 34,228                      | 0  |                                 |
|                                                                        | Trans-anal irrigation                                         | 2 | 42,133                      | 0  |                                 |
| <b>Interventions in particular settings</b>                            |                                                               |   |                             |    |                                 |
|                                                                        | Acute care settings                                           | 0 |                             | 0  |                                 |
|                                                                        | Bowel management in low-resource settings                     | 0 |                             | 0  |                                 |
|                                                                        | Improvements to physical environment                          | 3 | 29,41,43                    | 2  | 166,168                         |
|                                                                        | Products for odour and sounds                                 | 0 |                             | 0  |                                 |
|                                                                        | Toileting assistance programmes                               | 4 | 29,41,44,228                | 0  |                                 |
|                                                                        | Wireless technology monitoring wetness sensors - nursing home | 1 | 2                           | 1  | 240                             |
| <b>Interventions in particular populations</b>                         |                                                               |   |                             |    |                                 |
|                                                                        | Diabetes and FI                                               | 0 |                             | 0  |                                 |
|                                                                        | Management of FI for cancer patients                          | 0 |                             | 10 | 3,5,7,81,87,100,102,105,198,219 |
|                                                                        | Post-menopausal women                                         | 1 | 176                         | 0  |                                 |
|                                                                        | Pregnant/post-partum women                                    | 4 | 94,95,241,242               | 1  | 106                             |
| <b>Other</b>                                                           |                                                               |   |                             |    |                                 |
|                                                                        | Compliance                                                    | 0 |                             | 0  |                                 |
|                                                                        | Dermatitis                                                    | 8 | 43,158-162,164,234          | 4  | 84,165-167                      |
|                                                                        | Diagnostic tools                                              | 6 | 34,135,241,243-245          | 5  | 148,150,221,246,247             |
|                                                                        | Financial support                                             | 0 |                             | 0  |                                 |
|                                                                        | Microbial transplant                                          | 0 |                             | 1  | 248                             |
|                                                                        | Pressure sores                                                | 0 |                             | 0  |                                 |
|                                                                        | Psychological support                                         | 0 |                             | 0  |                                 |

|                     |                                                         |   |  |   |                    |
|---------------------|---------------------------------------------------------|---|--|---|--------------------|
|                     | Qualitative research/ mixed methods/ lived experiences  | 0 |  | 0 |                    |
|                     | Quality of life                                         | 0 |  | 5 | 87,122,127,149,198 |
|                     | Technology                                              | 0 |  | 1 | 45                 |
|                     | Treatments that are not pharmaceuticals or naturopathic | 0 |  | 0 |                    |
|                     | Unsure                                                  | 0 |  | 0 |                    |
| <b>Out of scope</b> |                                                         |   |  |   |                    |
|                     | Disposal of products                                    | 0 |  | 0 |                    |
|                     | Mechanisms and causes                                   | 0 |  | 0 |                    |
|                     | Prevalence                                              | 0 |  | 0 |                    |
|                     | Prevention of FI                                        | 0 |  | 0 |                    |

## References

- Nusrat S, Gulick E, Levinthal D, Bielefeldt K. Anorectal dysfunction in Multiple Sclerosis: A systematic review. *ISRN Neurology*. 2012 2012/07/29;2012:376023. Available from: <https://doi.org/10.5402/2012/376023>.
- Buswell M, Goodman C, Roe B, Russell B, Norton C, Harwood R, et al. What works to improve and manage fecal incontinence in care home residents living with dementia? A realist synthesis of the evidence. *Journal of the American Medical Directors Association*. 2017;18(9):752-60.e1. Available from: <http://dx.doi.org/10.1016/j.jamda.2017.05.025>.
- Clinicaltrials.gov. *Evaluation of a Novel Electronic Transanal Irrigation System - Navina Smart*. Trial ID: NCT02709395. 2016. Status: Completed. Available from: <https://clinicaltrials.gov/ct2/show/NCT02709395> [Accessed 11 August 2020].
- Clinicaltrials.gov. *Comparison of Transanal Irrigation and Glycerol Suppositories in Treatment of Low Anterior Resection Syndrome*. Trial ID: NCT04087421. 2019. Status: Recruiting. Available from: <https://clinicaltrials.gov/ct2/show/NCT04087421> [Accessed 11 August 2020].
- Clinicaltrials.gov. *Effect of Treatment of Low Anterior Resection Syndrome After Rectal Cancer Surgery*. Trial ID: NCT03215017. 2017. Status: Recruiting. Available from: <https://clinicaltrials.gov/ct2/show/NCT03215017> [Accessed 11 August 2020].
- Clinicaltrials.gov. *Low Anterior Resection Syndrome and Rectal Irrigation Study (LARRIS)*. Trial ID: NCT04246775. 2015. Status: Completed. Available from: <https://clinicaltrials.gov/ct2/show/NCT04246775> [Accessed 11 August 2020].
- ISRCTN Registry. *Efficiency of transanal irrigation and stimulation of a nerve of the ankle to improve symptoms and quality of life after radical surgery of rectal cancer*. Trial ID: ISRCTN18237643. 2017. Status: Completed. Available from: <https://www.isrctn.com/ISRCTN18237643> [Accessed 11 August 2020].
- Tabbers MM, Benninga MA. Constipation in children: fibre and probiotics. *BMJ Clinical Evidence*. 2015;10:10. Available from: <https://www.ncbi.nlm.nih.gov/pmc/articles/PMC4356179/>.
- Koppen IJ, Benninga MA, Tabbers MM. Is there a role for pre-, pro- and synbiotics in the treatment of functional constipation in children? A systematic review. *Journal of Pediatric Gastroenterology and Nutrition*. 2016;63 Suppl 1:S27-35. Available from: <https://dx.doi.org/10.1097/MPG.0000000000001220>.
- Coggrave M, Norton C, Cody JD. Management of faecal incontinence and constipation in adults with central neurological diseases. *Cochrane Database of Systematic Reviews*. 2014(1):CD002115. Available from: <https://dx.doi.org/10.1002/14651858.CD002115.pub5>.
- Wojtyniak K, Szajewska H. Systematic review: probiotics for functional constipation in children. *European Journal of Pediatrics*. 2017;176(9):1155-62. Available from: <https://dx.doi.org/10.1007/s00431-017-2972-2>.
- Thai Clinical Trials Registry (TCTR). *A Randomized- Double-Blind- Crossover- Placebo Controlled Trial of Bacillus clausii in Childhood Constipation*. Trial ID: TCTR20200222003. 2020. Status: Not Yet Recruiting. Available from: [Accessed 11 August 2020].
- Clinicaltrials.gov. *A Study to Assess the Efficacy and Safety of Salix Probiotic Blend in Participants With Functional Gastrointestinal Disturbances*. Trial ID: NCT04155801. 2019. Status: Recruiting. Available from: <https://clinicaltrials.gov/ct2/show/NCT04155801> [Accessed 11 August 2020].
- Clinicaltrials.gov. *Prebiotic Fructans Effect on 1-3 Years Constipated Children's Bowel Habits (CONSTICHILD)*. Trial ID: NCT03941925. 2019. Status: Not Yet Recruiting. Available from: <https://clinicaltrials.gov/ct2/show/NCT03941925> [Accessed 11 August 2020].

- 15 Clinicaltrials.gov. *Dried Plums (Prunes) vs. Polyethylene Glycol 4000 for Treatment of Functional Constipation in Children*. Trial ID: NCT03639142. 2018. Status: Not Yet Recruiting. Available from: <https://clinicaltrials.gov/ct2/show/NCT03639142> [Accessed 11 August 2020].
- 16 UMIN Clinical Trials Registry (UMIN-CTR). *Effect of Lactobacillus reuteri DSM 17938 on functional constipation of infants*. Trial ID: UMIN000033922. 2017. Status: Active- Not Recruiting. Available from: [Accessed 11 August 2020].
- 17 Clinicaltrials.gov. *Effects of Paediatric Tuina (Massage) on Constipation and Related Symptoms Among the Pre-school Aged Children*. Trial ID: NCT03751267. 2018. Status: Recruiting. Available from: <https://clinicaltrials.gov/ct2/show/NCT03751267> [Accessed 11 August 2020].
- 18 Clinicaltrials.gov. *Efficacy of Acupuncture as a Treatment for Faecal Incontinence*. Trial ID: NCT04276350. 2018. Status: Recruiting. Available from: <https://clinicaltrials.gov/ct2/show/NCT04276350> [Accessed 11 August 2020].
- 19 Clinicaltrials.gov. *Efficacy of Chinese Herbal Medicine Xiaojidaozhi Decoction in the Treatment of Childhood Constipation*. Trial ID: NCT03186079. 2017. Status: Other. Available from: <https://clinicaltrials.gov/ct2/show/NCT03186079> [Accessed 11 August 2020].
- 20 Clinicaltrials.gov. *Stimulation for Colonic Motility*. Trial ID: NCT02641483. 2019. Status: Invitation. Available from: <https://clinicaltrials.gov/ct2/show/NCT02641483> [Accessed 11 August 2020].
- 21 Clinicaltrials.gov. *Prove of Concept Study- to Evaluate the Efficacy- Safety- and Tolerability of IBEROGAST in the Treatment of Bowel Troubles in Patients With Parkinson's Disease (PHYTOPARK)*. Trial ID: NCT02719496. 2016. Status: Completed. Available from: <https://clinicaltrials.gov/ct2/show/NCT02719496> [Accessed 11 August 2020].
- 22 Clinicaltrials.gov. *Acupuncture in Low Anterior Resection Syndrome Treatment (AcuLARS)*. Trial ID: NCT03916549. 2018. Status: Recruiting. Available from: <https://clinicaltrials.gov/ct2/show/NCT03916549> [Accessed 11 August 2020].
- 23 Clinical Research Information Service (CRIS). *The effect of probiotics on functional constipation in children*. Trial ID: KCT0004155. 2019. Status: Not Yet Recruiting. Available from: [Accessed 11 August 2020].
- 24 ISRCTN Registry. *The effect of acupuncture for constipation after ischemic stroke*. Trial ID: ISRCTN22214747. 2015. Status: Completed. Available from: <https://www.isrctn.com/ISRCTN22214747> [Accessed 11 August 2020].
- 25 UMIN Clinical Trials Registry (UMIN-CTR). *The efficacy of Daikenchuto(TJ-100) on abdominal pain and abdominal fullness feeling in the patients with fecal incontinence*. Trial ID: UMIN000030252. 2017. Status: Not Yet Recruiting. Available from: [Accessed 11 August 2020].
- 26 Clinicaltrials.gov. *Prebiotics for Spinal Cord Injury Patients With Bowel and Bladder Dysfunction*. Trial ID: NCT03987126. 2019. Status: Not Yet Recruiting. Available from: <https://clinicaltrials.gov/ct2/show/NCT03987126> [Accessed 11 August 2020].
- 27 Clinical Trials Registry - India (CTRI). *comparison of Haritaki Draksha avaleha and Aargwad phalmajja avaleha in the Treatment of Constipation in the age group of 5 to 10 years*. Trial ID: CTRI/2018/12/016752. 2018. Status: Not Available. Available from: [Accessed 11 August 2020].
- 28 Clinical Trials Registry - India (CTRI). *comparison of Haritaki pippali avaleha and Aargwadha phalamajja avaleha in the treatment of constipation in the age group of 3 to 6 years*. Trial ID: CTRI/2019/03/018241. 2019. Status: Not Available. Available from: [Accessed 11 August 2020].
- 29 Hagglund D. A systematic literature review of incontinence care for persons with dementia: the research evidence. *Journal of Clinical Nursing*. 2010;19(3-4):303-12. Available from: <https://dx.doi.org/10.1111/j.1365-2702.2009.02958.x>.
- 30 Simillis C, Lal N, Pellino G, Baird D, Nikolaou S, Kontovounisios C, et al. A systematic review and network meta-analysis comparing treatments for faecal incontinence. *International Journal of Surgery*. 2019;66:37-47. Available from: <https://dx.doi.org/10.1016/j.ijss.2019.04.007>.
- 31 Kenny KA, Skelly JM. Dietary fiber for constipation in older adults: a systematic review. *Clinical Effectiveness in Nursing*. 2001;5:120-8. Available from: <https://doi.org/10.1054/cein.2001.0225>.
- 32 Yeung HY, Iyer P, Pryor J, Nicholson M. Dietary management of neurogenic bowel in adults with spinal cord injury: an integrative review of literature. *Disability and Rehabilitation*. 2019:1-12. Available from: <https://dx.doi.org/10.1080/09638288.2019.1652702>.
- 33 Tan E, Ngo NT, Darzi A, Shenouda M, Tekkis PP. Meta-analysis: sacral nerve stimulation versus conservative therapy in the treatment of faecal incontinence. *International Journal of Colorectal Disease*. 2011;26(3):275-94. Available from: <https://dx.doi.org/10.1007/s00384-010-1119-y>.
- 34 Shamliyan T, Wyman J, Bliss DZ, Kane RL, Wilt TJ. Prevention of urinary and fecal incontinence in adults. *Evidence Report/Technology Assessment*. 2007(161):1-379. Available from: <https://www.ncbi.nlm.nih.gov/pmc/articles/PMC4781595/>.
- 35 Colavita K, Andy UU. Role of diet in fecal incontinence: A systematic review of the literature. *International Urogynecology Journal*. 2016;27(12):1805-10. Available from: <https://doi.org/10.1007/s00192-016-2979-7>.
- 36 Piccoli de Mello P, Eifer DA, Daniel de Mello E. Use of fibers in childhood constipation treatment: systematic review with meta-analysis [In Portuguese]. *Jornal de Pediatria*. 2018;94(5):460-70. Available from: <https://dx.doi.org/10.1016/j.jped.2017.10.014>.
- 37 Clinicaltrials.gov. *Diet and Fecal Incontinence in Senior Women*. Trial ID: NCT03510052. 2018. Status: Recruiting. Available from: <https://clinicaltrials.gov/ct2/show/NCT03510052> [Accessed 11 August 2020].

- 38 Clinicaltrials.gov. *Physical Fitness- Body Composition and Frailty in Elderly People.Exercise Program Effects. EXERNET Elder 3.0 (EXERNETElder)*. Trial ID: NCT03831841. 2018. Status: Active- Not Recruiting. Available from: <https://clinicaltrials.gov/ct2/show/NCT03831841> [Accessed 11 August 2020].
- 39 Clinicaltrials.gov. *Prevalence of FODMAP Intolerance and JHS in FGID and Association With Microbiome-Dyssynergic Defecation and Dietary Intervention (PreDiMi)*. Trial ID: NCT03460613. 2017. Status: Recruiting. Available from: <https://clinicaltrials.gov/ct2/show/NCT03460613> [Accessed 11 August 2020].
- 40 Clinicaltrials.gov. *The Effect of the Low Fodmap Diet in Children With Autism Spectrum Disorders*. Trial ID: NCT04054349. 2019. Status: Completed. Available from: <https://clinicaltrials.gov/ct2/show/NCT04054349> [Accessed 11 August 2020].
- 41 Brazzelli M, Griffiths PV, Cody JD, Tappin D. Behavioural and cognitive interventions with or without other treatments for the management of faecal incontinence in children. *Cochrane Database of Systematic Reviews*. 2011(12). Available from: <https://doi.org/10.1002/14651858.CD002240.pub4>.
- 42 Flanagan L, Roe B, Jack B, Shaw C, Williams KS, Chung A, et al. Factors with the management of incontinence and promotion of continence in older people in care homes. *Journal of Advanced Nursing*. 2014;70(3):476-96. Available from: <https://dx.doi.org/10.1111/jan.12220>.
- 43 Goodman C, Norton C, Buswell M, Russell B, Harari D, Harwood R, et al. Managing Faecal INcontinence in people with advanced dementia resident in Care Homes (FINCH) study: a realist synthesis of the evidence. *Health Technol Assessment*. 2017;21(42):1-220. Available from: <https://dx.doi.org/10.3310/hta21420>.
- 44 Forte ML, Andrade KE, Butler M, Lowry AC, Bliss DZ, Slavin JL, et al. *Treatments for Fecal Incontinence*. . Rockville (MD): Agency for Healthcare Research and Quality (US)
2016. Report No.: Comparative Effectiveness Review, No. 16. Available from: <https://www.ncbi.nlm.nih.gov/books/NBK356097/>.
- 45 Clinicaltrials.gov. *Child Health Improvement Through Computer Automation of Constipation Management in Primary Care (CHICA-GI)*. Trial ID: NCT02354820. 2015. Status: Other. Available from: <https://clinicaltrials.gov/ct2/show/NCT02354820> [Accessed 11 August 2020].
- 46 Clinicaltrials.gov. *Community-Based Continence Promotion: Sustaining Healthy Aging in Place (SHAIP) Through Mind Over Matter (MOM) (SHAIP)*. Trial ID: NCT03140852. 2017. Status: Completed. Available from: <https://clinicaltrials.gov/ct2/show/NCT03140852> [Accessed 11 August 2020].
- 47 Clinicaltrials.gov. *Individual Follow-up After Rectal Cancer - Focus on the Needs of the Patient (FURCA)*. Trial ID: NCT03622437. 2016. Status: Recruiting. Available from: <https://clinicaltrials.gov/ct2/show/NCT03622437> [Accessed 11 August 2020].
- 48 Clinicaltrials.gov. *Physical Training and Health Education in Hospitalized Elderly*. Trial ID: NCT03604640. 2018. Status: Recruiting. Available from: <https://clinicaltrials.gov/ct2/show/NCT03604640> [Accessed 11 August 2020].
- 49 Clinicaltrials.gov. *Pilot: Mind Over Matter: Healthy Bowels- Healthy Bladder*. Trial ID: NCT02671747. 2015. Status: Completed. Available from: <https://clinicaltrials.gov/ct2/show/NCT02671747> [Accessed 11 August 2020].
- 50 Clinicaltrials.gov. *Use of the Leva Pelvic Digital Health System in Women With Fecal Incontinence*. Trial ID: NCT04027335. 2019. Status: Recruiting. Available from: <https://clinicaltrials.gov/ct2/show/NCT04027335> [Accessed 11 August 2020].
- 51 Thomas GP, Dudding TC, Rahbour G, Nicholls RJ, Vaizey CJ. A review of posterior tibial nerve stimulation for faecal incontinence. *Colorectal Disease*. 2013;15(5):519-26. Available from: <https://dx.doi.org/10.1111/codi.12093>.
- 52 Deng Y, Dong Y, Liu Y, Zhang Q, Guan X, Chen X, et al. A systematic review of clinical studies on electrical stimulation therapy for patients with neurogenic bowel dysfunction after spinal cord injury. *Medicine (Baltimore)*. 2018;97(41):e12778. Available from: <https://dx.doi.org/10.1097/MD.00000000000012778>.
- 53 Lal N, Simillis C, Slesser A, Kontovounisios C, Rasheed S, Tekkis PP, et al. A systematic review of the literature reporting on randomised controlled trials comparing treatments for faecal incontinence in adults. *Acta Chirurgica Belgica*. 2019;119(1):1-15. Available from: <https://dx.doi.org/10.1080/00015458.2018.1549392>.
- 54 Iacona R, Ramage L, Malakounides G. Current state of neuromodulation for constipation and fecal incontinence in children: A systematic review. *European Journal of Pediatric Surgery*. 2019;29(6):495-503. Available from: <https://dx.doi.org/10.1055/s-0038-1677485>.
- 55 Nelson MES, Orr M. Digital rectal stimulation as an intervention in persons with spinal cord injury and upper motor neuron neurogenic bowel. An evidenced-based systematic review of the literature. *The Journal of Spinal Cord Medicine*. 2019:1-8. Available from: <https://dx.doi.org/10.1080/10790268.2019.1696077>.
- 56 Vonthein R, Heimerl T, Schwandner T, Ziegler A. Electrical stimulation and biofeedback for the treatment of fecal incontinence: a systematic review. *International Journal of Colorectal Disease*. 2013;28(11):1567-77. Available from: <https://dx.doi.org/10.1007/s00384-013-1739-0>.
- 57 Hosker G, Cody JD, Norton CC. Electrical stimulation for faecal incontinence in adults. *Cochrane Database of Systematic Reviews*. 2007(3). Available from: <https://doi.org/10.1002/14651858.CD001310.pub2>.
- 58 Sarveazad A, Babahajian A, Amini N, Shamseddin J, Yousefifard M. Posterior tibial nerve Stimulation in fecal incontinence: A systematic review and meta-analysis. *BCN*. 2019;10(5):419-31. Available from: <https://dx.doi.org/10.32598/bcn.9.10.290>.



- 59 Edenfield AL, Amundsen CL, Wu JM, Levin PJ, Siddiqui NY. Posterior tibial nerve stimulation for the treatment of fecal incontinence: a systematic evidence review. *Obstetrical & Gynecological Survey*. 2015;70(5):329-41. Available from: <https://dx.doi.org/10.1097/OGX.0000000000000171>.
- 60 Arroyo Fernandez R, Avendano Coy J, Ando Lafuente S, Martin Correa MT, Ferri Morales A. Posterior tibial nerve stimulation in the treatment of fecal incontinence: A systematic review [In Spanish]. *Revista Española de Enfermedades Digestivas [The Spanish Journal of Gastroenterology]*. 2018;110(9):577-88. Available from: <http://doi.org/10.17235/reed.2018.5007/2017>.
- 61 Ratto C, Litta F, Parello A, Donisi L, De Simone V, Zaccone G. Sacral nerve stimulation in faecal incontinence associated with an anal sphincter lesion: A systematic review. *Colorectal Disease*. 2012;14(6):e297-304. Available from: <https://dx.doi.org/10.1111/j.1463-1318.2012.03003.x>.
- 62 Brown SR, Wadhawan H, Nelson RL. Surgery for faecal incontinence in adults. *Cochrane Database of Systematic Reviews*. 2013;Issue 7(Art. No.: CD001757). Available from: <https://doi.org/10.1002/14651858.CD001757.pub4>.
- 63 Forte ML, Andrade KE, Lowry AC, Butler M, Bliss DZ, Kane RL. Systematic review of surgical treatments for fecal incontinence. *Diseases of the Colon & Rectum*. 2016;59(5):443-69. Available from: <https://dx.doi.org/10.1097/DCR.0000000000000594>.
- 64 Thin NN, Horrocks EJ, Hotouras A, Palit S, Thaha MA, Chan CL, et al. Systematic review of the clinical effectiveness of neuromodulation in the treatment of faecal incontinence. *British Journal of Surgery*. 2013;100(11):1430-47. Available from: <https://dx.doi.org/10.1002/bjs.9226>.
- 65 Horrocks EJ, Thin N, Thaha MA, Taylor SJ, Norton C, Knowles CH. Systematic review of tibial nerve stimulation to treat faecal incontinence. *British Journal of Surgery*. 2014;101(5):457-68. Available from: <https://dx.doi.org/10.1002/bjs.9391>.
- 66 Ng RT, Lee WS, Ang HL, Teo KM, Yik YI, Lai NM. Transcutaneous electrical stimulation (TES) for treatment of constipation in children. *Cochrane Database of Systematic Reviews*. 2016(11):CD010873. Available from: <http://dx.doi.org/10.1002/14651858.CD010873.pub4>.
- 67 Maris A, Devreese AM, D'Hoore A, Penninckx F, Staes F. Treatment options to improve anorectal function following rectal resection: a systematic review. *Colorectal Disease*. 2013;15(2):e67-78. Available from: <https://dx.doi.org/10.1111/codi.12036>.
- 68 Tan K, Wells Cl, Dinning P, Bissett IP, O'Grady G. Placebo response rates in electrical nerve stimulation trials for fecal incontinence and constipation: A systematic review and meta-analysis. *Neuromodulation*. 2019;30:30. Available from: <https://dx.doi.org/10.1111/ner.13092>.
- 69 Parittotokkaporn S, Varghese C, O'Grady G, Svirskis D, Subramanian S, O'Carroll SJ. Non-invasive neuromodulation for bowel, bladder and sexual restoration following spinal cord injury: a systematic review. *Clinical Neurology and Neurosurgery*. 2020;194:105822. Available from: <http://ksrevidence.com/article/KSRA132813>.
- 70 Clinicaltrials.gov. *BTL Emsella Chair Versus Sham for the Treatment of Fecal Incontinence*. Trial ID: NCT04138602. 2019. Status: Not Yet Recruiting. Available from: <https://clinicaltrials.gov/ct2/show/NCT04138602> [Accessed 11 August 2020].
- 71 Clinicaltrials.gov. *Biofeedback Vs Electrical Stimulation in Treatment of Fecal Incontinence*. Trial ID: NCT04380571. 2018. Status: Completed. Available from: <https://clinicaltrials.gov/ct2/show/NCT04380571> [Accessed 11 August 2020].
- 72 Australian New Zealand Clinical Trials Registry (ANZCTR). *Tranabdominal Electric Stimulation in the treatment of Chronic Constipation in Children - TESCCO trial*. Trial ID: ACTRN12620000131954p. 2020. Status: Not Yet Recruiting. Available from: [Accessed 11 August 2020].
- 73 Clinicaltrials.gov. *Pelvic Floor Consciousness (PFMCON)*. Trial ID: NCT04334798. 2019. Status: Recruiting. Available from: <https://clinicaltrials.gov/ct2/show/NCT04334798> [Accessed 11 August 2020].
- 74 ISRCTN Registry. *Stimulation of pudendal nerve for management of adult faecal incontinence using key hole surgery*. Trial ID: ISRCTN49693042. 2016. Status: Completed. Available from: <https://www.isrctn.com/ISRCTN49693042> [Accessed 11 August 2020].
- 75 Clinicaltrials.gov. *Neuromodulation for Accidental Bowel Leakage (NOTABLE)*. Trial ID: NCT03278613. 2018. Status: Recruiting. Available from: <https://clinicaltrials.gov/ct2/show/NCT03278613> [Accessed 11 August 2020].
- 76 Clinicaltrials.gov. *Optimising Treatments for Faecal Incontinence*. Trial ID: NCT04273009. 2016. Status: Completed. Available from: <https://clinicaltrials.gov/ct2/show/NCT04273009> [Accessed 11 August 2020].
- 77 Clinicaltrials.gov. *Tibial Nerve Stimulation in Combination With Biofeedback*. Trial ID: NCT02888899. 2016. Status: Other. Available from: <https://clinicaltrials.gov/ct2/show/NCT02888899> [Accessed 11 August 2020].
- 78 Clinicaltrials.gov. *Bladder and Transcutaneous Tibial Nerve Stimulation for nEurogenic Lower Urinary Tract Dysfunction (bTUNED) (bTUNED)*. Trial ID: NCT04315142. 2020. Status: Active- Not Recruiting. Available from: <https://clinicaltrials.gov/ct2/show/NCT04315142> [Accessed 11 August 2020].
- 79 Australian New Zealand Clinical Trials Registry (ANZCTR). *Percutaneous posterior tibial nerve stimulation (PTNS) and biofeedback for treating faecal incontinence*. Trial ID: ACTRN12616000056493. 2016. Status: Completed. Available from: [Accessed 11 August 2020].
- 80 Clinicaltrials.gov. *Vaginal Electrical Stimulation for Postpartum Neuromuscular Recovery (VESPR)*. Trial ID: NCT02701413. 2016. Status: Completed. Available from: <https://clinicaltrials.gov/ct2/show/NCT02701413> [Accessed 11 August 2020].

- 81 Clinicaltrials.gov. *Testing Diet Intervention Versus Non-Diet Intervention for Management of Bowel Symptoms in Rectal Cancer Survivors*. Trial ID: NCT04205955. 2019. Status: Recruiting. Available from: <https://clinicaltrials.gov/ct2/show/NCT04205955> [Accessed 11 August 2020].
- 82 Australian New Zealand Clinical Trials Registry (ANZCTR). *Comparison of low-chemical elimination diet with a low fermentable oligo- di- mono-saccharide and polyol (low FODMAP) diet for the management of functional gastrointestinal disorders (FGID)*. Trial ID: ACTRN12615000542594. 2018. Status: Not Yet Recruiting. Available from: [Accessed 11 August 2020].
- 83 Clinicaltrials.gov. *Efficacy and Safety of Hou Gu Mi Xi in Patients With Spleen Qi Deficiency and Non-organic Gastrointestinal Disorders*. Trial ID: NCT03019042. 2016. Status: Active- Not Recruiting. Available from: <https://clinicaltrials.gov/ct2/show/NCT03019042> [Accessed 11 August 2020].
- 84 Thai Clinical Trials Registry (TCTR). *Effects of skin care protocol on the severity of Incontinence Associated Dermatitis*. Trial ID: TCTR20200717001. 2020. Status: Not Yet Recruiting. Available from: [Accessed 11 August 2020].
- 85 Clinicaltrials.gov. *Impact of a Multicomponent Exercise Program on Functional Capacity in Frail Aged Participants With Cognitive Decline*. Trial ID: NCT03657940. 2017. Status: Recruiting. Available from: <https://clinicaltrials.gov/ct2/show/NCT03657940> [Accessed 11 August 2020].
- 86 Clinicaltrials.gov. *Neuromodulation Therapy for Fecal Incontinence*. Trial ID: NCT02556151. 2015. Status: Completed. Available from: <https://clinicaltrials.gov/ct2/show/NCT02556151> [Accessed 11 August 2020].
- 87 Clinicaltrials.gov. *Translumbosacral Neuromodulation for FI (TNT)*. Trial ID: NCT03899181. 2019. Status: Recruiting. Available from: <https://clinicaltrials.gov/ct2/show/NCT03899181> [Accessed 11 August 2020].
- 88 Norton C, Cody JD. Biofeedback and/or sphincter exercises for the treatment of faecal incontinence in adults. *Cochrane Database of Systematic Reviews*. 2012(7). Available from: <https://doi.org/10.1002/14651858.CD002111.pub3>.
- 89 Norton C, Kamm MA. Anal sphincter biofeedback and pelvic floor exercises for faecal incontinence in adults - A systematic review. *Alimentary Pharmacology and Therapeutics*. 2001;15(8):1147-54. Available from: <http://dx.doi.org/10.1046/j.1365-2036.2001.01039.x>.
- 90 ECRI. *Biofeedback for the treatment of fecal incontinence*. United States: ECRI; 1998. Available from:
- 91 Enck P, van der Voort IR, Klosterhalfen S. Biofeedback therapy in fecal incontinence and constipation. *Neurogastroenterology and Motility*. 2009;21(11):1133-41. Available from: <http://www.crd.york.ac.uk/CRDWeb/ShowRecord.asp?ID=12009110324>.
- 92 Palssson OS, Heymen S, Whitehead WE. Biofeedback treatment for functional anorectal disorders: a comprehensive efficacy review. *Applied Psychophysiology and Biofeedback*. 2004;29(3):153-74. Available from: [https://www.aapb.org/files/public/Palssson\\_White\\_Paper.pdf](https://www.aapb.org/files/public/Palssson_White_Paper.pdf).
- 93 Riemsma R, Hagen S, Kirschner-Hermanns R, Norton C, Wijk H, Andersson KE, et al. Can incontinence be cured? A systematic review of cure rates. *BMC Medicine*. 2017;15(1):63. Available from: <https://dx.doi.org/10.1186/s12916-017-0828-2>.
- 94 Wu YM, McInnes N, Leong Y. Pelvic floor muscle training versus watchful waiting and pelvic floor disorders in postpartum women: A systematic review and meta-analysis. *emale Pelvic Medicine & Reconstructive Surgery*. 2018;24(2):142-9. Available from: <https://dx.doi.org/10.1097/SPV.0000000000000513>.
- 95 Harvey MA. Pelvic floor exercises during and after pregnancy: a systematic review of their role in preventing pelvic floor dysfunction. *Journal of Obstetrics and Gynaecology Canada*. 2003;25(6):487-98. Available from: [https://doi.org/10.1016/S1701-2163\(16\)30310-3](https://doi.org/10.1016/S1701-2163(16)30310-3).
- 96 Park SH, Kang CB, Jang SY, Kim BY. Effect of Kegel exercise to prevent urinary and fecal incontinence in antenatal and postnatal women: systematic review [In Korean]. *Journal of Korean Academy of Nursing*. 2013;43(3):420-30. Available from: <https://dx.doi.org/10.4040/jkan.2013.43.3.420>.
- 97 UMIN Clinical Trials Registry (UMIN-CTR). *A randomized controlled trial of transabdominal ultrasound biofeedback in postpartum pelvic floor muscle training. (Sango-PFMT Trial)*. Trial ID: UMIN000025165. 2016. Status: Completed. Available from: [Accessed 11 August 2020].
- 98 Clinicaltrials.gov. *Fecal Incontinence Treatment (FIT) Study*. Trial ID: NCT03811821. 2019. Status: Recruiting. Available from: <https://clinicaltrials.gov/ct2/show/NCT03811821> [Accessed 11 August 2020].
- 99 Clinicaltrials.gov. *Biofeedback Training Fecal Incontinence in Children*. Trial ID: NCT04472923. 2018. Status: Completed. Available from: <https://clinicaltrials.gov/ct2/show/NCT04472923> [Accessed 11 August 2020].
- 100 Australian New Zealand Clinical Trials Registry (ANZCTR). *Pelvic floor rehabilitation to improve bowel symptoms-pelvic floor function and quality of life among patients with rectal cancer*. Trial ID: ACTRN1262000040965. 2020. Status: Not Yet Recruiting. Available from: [Accessed 11 August 2020].
- 101 Clinicaltrials.gov. *Pelvic Floor Muscles Training After Radical Prostatectomy*. Trial ID: NCT04172519. 2018. Status: Invitation. Available from: <https://clinicaltrials.gov/ct2/show/NCT04172519> [Accessed 11 August 2020].
- 102 Clinicaltrials.gov. *Exercise Training for Rectal Cancer Patients*. Trial ID: NCT02538913. 2015. Status: Recruiting. Available from: <https://clinicaltrials.gov/ct2/show/NCT02538913> [Accessed 11 August 2020].
- 103 Australian New Zealand Clinical Trials Registry (ANZCTR). *The effect of antenatal pelvic floor muscle exercises on female sexual function: A randomised controlled trial*. Trial ID: ACTRN12617001030369. 2017. Status: Completed. Available from: [Accessed 11 August 2020].



- 104 Clinicaltrials.gov. *Home Versus Office Biofeedback Therapy for Fecal Incontinence*. Trial ID: NCT03216291. 2015. Status: Recruiting. Available from: <https://clinicaltrials.gov/ct2/show/NCT03216291> [Accessed 11 August 2020].
- 105 Clinicaltrials.gov. *Physical Exercise for Colorectal Cancer Patients After Transanal Total Mesorectal Excision*. Trial ID: NCT03120104. 2017. Status: Other. Available from: <https://clinicaltrials.gov/ct2/show/NCT03120104> [Accessed 11 August 2020].
- 106 Clinicaltrials.gov. *Manual Fascial Manipulation in Pregnant Women*. Trial ID: NCT03041246. 2018. Status: Recruiting. Available from: <https://clinicaltrials.gov/ct2/show/NCT03041246> [Accessed 11 August 2020].
- 107 Clinicaltrials.gov. *Physical Therapy for Anal Incontinence*. Trial ID: NCT03252951. 2017. Status: Recruiting. Available from: <https://clinicaltrials.gov/ct2/show/NCT03252951> [Accessed 11 August 2020].
- 108 ISRCTN Registry. *Use of physiotherapy to improve bowel function after rectal cancer surgery*. Trial ID: ISRCTN77383505. 2017. Status: Completed. Available from: <https://www.isrctn.com/ISRCTN77383505> [Accessed 11 August 2020].
- 109 Freeman KA, Riley A, Duke DC, Fu R. Systematic review and meta-analysis of behavioral interventions for fecal incontinence with constipation. *Journal of Pediatric Psychology*. 2014;39(8):887-902. Available from: <https://dx.doi.org/10.1093/jpepsy/jsu039>.
- 110 Coggrave M, Norton C, Cody JD. Management of faecal incontinence and constipation in adults with central neurological diseases. *Cochrane Database of Systematic Reviews*. 2014(1). Available from: <http://doi.org/10.1002/14651858.CD002115.pub5>.
- 111 Clinicaltrials.gov. *Treatment of Spinal Cord Injury Patients for Neurogenic Bladder: Anticholinergic Agent vs. Mirabegron (SCIMYR)*. Trial ID: NCT03612401. 2018. Status: Invitation. Available from: <https://clinicaltrials.gov/ct2/show/NCT03612401> [Accessed 11 August 2020].
- 112 Bray L, Sanders C. An evidence-based review of the use of transanal irrigation in children and young people with neurogenic bowel. *Spinal Cord*. 2013;51(2):88-93. Available from: <https://dx.doi.org/10.1038/sc.2012.146>.
- 113 Tod AM, Stringer E, Levery C, Dean J, Brown J. Rectal irrigation in the management of functional bowel disorders: a review. *British Journal of Nursing*. 2007;16(14):858-64. Available from: <https://doi.org/10.12968/bjon.2007.16.14.24323>.
- 114 Christensen P, Krogh K. Transanal irrigation for disordered defecation: a systematic review. *Scandinavian Journal of Gastroenterology*. 2010;45(5):517-27. Available from: <https://dx.doi.org/10.3109/00365520903583855>.
- 115 Clinicaltrials.gov. *An Open- Qualitative- Prospective- Multicenter Trial of a Novel Transanal Irrigation System in Spinal Cord Injured Patients*. Trial ID: NCT02979808. 2016. Status: Completed. Available from: <https://clinicaltrials.gov/ct2/show/NCT02979808> [Accessed 11 August 2020].
- 116 Clinicaltrials.gov. *Retrograde Colonic Irrigation to Manage Spina Bifida Functional Digestive Sequelae: a Multicenter- Prospective- Randomized Controlled Trial (IRRICO)*. Trial ID: NCT02361450. 2015. Status: Completed. Available from: <https://clinicaltrials.gov/ct2/show/NCT02361450> [Accessed 11 August 2020].
- 117 Clinicaltrials.gov. *Encopresis & MIE (DoD #2)*. Trial ID: NCT03197922. 2017. Status: Recruiting. Available from: <https://clinicaltrials.gov/ct2/show/NCT03197922> [Accessed 11 August 2020].
- 118 Clinicaltrials.gov. *Electrical Stimulation of Abdominal Muscles for Bowel Management in People With Spinal Cord Injury (BOWMAN)*. Trial ID: NCT04307303. 2020. Status: Not Yet Recruiting. Available from: <https://clinicaltrials.gov/ct2/show/NCT04307303> [Accessed 11 August 2020].
- 119 Clinicaltrials.gov. *Transcutaneous and Epidural Spinal Stimulation for Enabling Motor Function in Humans With Motor Complete Paraplegia (TransEpi)*. Trial ID: NCT03945331. 2019. Status: Invitation. Available from: <https://clinicaltrials.gov/ct2/show/NCT03945331> [Accessed 11 August 2020].
- 120 ISRCTN Registry. *SUMS: Standing up in people with multiple sclerosis*. Trial ID: ISRCTN69614598. 2015. Status: Completed. Available from: <https://www.isrctn.com/ISRCTN69614598> [Accessed 11 August 2020].
- 121 Clinicaltrials.gov. *Effects of Osteopathic Manipulative Treatment in People With Neurogenic Bowel Dysfunction*. Trial ID: NCT04127617. 2019. Status: Recruiting. Available from: <https://clinicaltrials.gov/ct2/show/NCT04127617> [Accessed 11 August 2020].
- 122 ISRCTN Registry. *Optimising pelvic floor muscle training to improve quality of life outcomes for individuals with progressive multiple sclerosis and incontinence*. Trial ID: ISRCTN77817048. 2015. Status: Completed. Available from: <https://www.isrctn.com/ISRCTN77817048> [Accessed 11 August 2020].
- 123 Clinicaltrials.gov. *Osteopathic Manipulative Treatments and Neurogenic Bowel Dysfunction in Patients With Spinal Cord Injuries*. Trial ID: NCT04367571. 2020. Status: Recruiting. Available from: <https://clinicaltrials.gov/ct2/show/NCT04367571> [Accessed 11 August 2020].
- 124 Clinicaltrials.gov. *Recovery of Bladder and Sexual Function After Human Spinal Cord Injury*. Trial ID: NCT04193709. 2021. Status: Not Yet Recruiting. Available from: <https://clinicaltrials.gov/ct2/show/NCT04193709> [Accessed 11 August 2020].
- 125 Clinicaltrials.gov. *Feasibility Study of the Use of the gekoTM Device for Faecal Incontinence in Older People Living at Home or in Care Homes*. Trial ID: NCT02875665. 2016. Status: Completed. Available from: <https://clinicaltrials.gov/ct2/show/NCT02875665> [Accessed 11 August 2020].
- 126 Clinicaltrials.gov. *NeuroRegen Scaffold Combined With Stem Cells for Chronic Spinal Cord Injury Repair*. Trial ID: NCT02688049. 2016. Status: Invitation. Available from: <https://clinicaltrials.gov/ct2/show/NCT02688049> [Accessed 11 August 2020].

- 127 Clinicaltrials.gov. *Improving Bowel Function and Quality of Life After Spinal Cord Injury*. Trial ID: NCT03949660. 2019. Status: Not Yet Recruiting. Available from: <https://clinicaltrials.gov/ct2/show/NCT03949660> [Accessed 11 August 2020].
- 128 Clinicaltrials.gov. *Transplantation of Autologous Bone Marrow or Leukapheresis-Derived Stem Cells for Treatment of Spinal Cord Injury*. Trial ID: NCT02687672. 2016. Status: Recruiting. Available from: <https://clinicaltrials.gov/ct2/show/NCT02687672> [Accessed 11 August 2020].
- 129 Chan DS, Delicata RJ. Meta-analysis of antegrade continence enema in adults with faecal incontinence and constipation. *British Journal of Surgery*. 2016;103(4):322-7. Available from: <https://dx.doi.org/10.1002/bjs.10051>.
- 130 Thaha MA, Abukar AA, Thin NN, Ramsanahie A, Knowles CH. Sacral nerve stimulation for faecal incontinence and constipation in adults. *Cochrane Database of Systematic Reviews*. 2015(8). Available from: <https://doi.org/10.1002/14651858.CD004464.pub3>.
- 131 Jin L, Deng L, Wu W, Wang Z, Shao W, Liu J. Systematic review and meta-analysis of the effect of probiotic supplementation on functional constipation in children. *Medicine (Baltimore)*. 2018;97(39):e12174. Available from: <https://dx.doi.org/10.1097/MD.00000000000012174>.
- 132 Jarrett ME, Mowatt G, Glazener CM, Fraser C, Nicholls RJ, Grant AM, et al. Systematic review of sacral nerve stimulation for faecal incontinence and constipation. *British Journal of Surgery*. 2004;91(12):1559-69. Available from: <https://doi.org/10.1002/bjs.4796>.
- 133 Emmett CD, Close HJ, Yiannakou Y, Mason JM. Trans-anal irrigation therapy to treat adult chronic functional constipation: systematic review and meta-analysis. *BMC Gastroenterology*. 2015;15:139. Available from: <http://ksrevvidence.com/article/KSRA7797>.
- 134 Patel AS, Saratzis A, Arasaradnam R, Harmston C. Use of Antegrade Continence Enema for the Treatment of Fecal Incontinence and Functional Constipation in Adults: A Systematic Review. *Diseases of the Colon & Rectum*. 2015;58(10). Available from: <http://doi.org.uk/10.1097/DCR.0000000000000428>.
- 135 Berger MY, Tabbers MM, Kurver MJ, Boluyt N, Benninga MA. Value of abdominal radiography, colonic transit time, and rectal ultrasound scanning in the diagnosis of idiopathic constipation in children: A systematic review. *Journal of Pediatrics*. 2012;161(1):44-50.e2. Available from: <http://dx.doi.org/10.1016/j.jpeds.2011.12.045>.
- 136 Petticrew M, Watt I, Brand M. What's the 'best buy' for treatment of constipation? Results of a systematic review of the efficacy and comparative efficacy of laxatives in the elderly. *British Journal of General Practice*. 1999;49(442):387-93. Available from: <https://bjgp.org/content/49/442/387>.
- 137 Harris RG, Neale EP, Ferreira I. When poorly conducted systematic reviews and meta-analyses can mislead: a critical appraisal and update of systematic reviews and meta-analyses examining the effects of probiotics in the treatment of functional constipation in children. *American Journal of Clinical Nutrition*. 2019;110(1):177-95. Available from: <http://doi.org/10.1093/ajcn/nqz071>.
- 138 Clinicaltrials.gov. *Orally Administered ENT-01 for Parkinson's Disease-Related Constipation (KARMET) (KARMET)*. Trial ID: NCT03781791. 2018. Status: Recruiting. Available from: <https://clinicaltrials.gov/ct2/show/NCT03781791> [Accessed 11 August 2020].
- 139 Clinicaltrials.gov. *Evaluation of Safety and Tolerability of ENT-01 for the Treatment of Parkinson's Disease Related Constipation (RASMET)*. Trial ID: NCT03047629. 2017. Status: Completed. Available from: <https://clinicaltrials.gov/ct2/show/NCT03047629> [Accessed 11 August 2020].
- 140 UMIN Clinical Trials Registry (UMIN-CTR). *Effectiveness of Elobixibat and Linaclotide in neurogenic bowel dysfunction due to spinal cord injury*. Trial ID: UMIN000035923. 2019. Status: Invitation. Available from: [Accessed 11 August 2020].
- 141 Clinicaltrials.gov. *Linaclotide Safety and Efficacy- Functional Constipation- in Pediatric Participants 6 to 17 Years of Age*. Trial ID: NCT04026113. 2019. Status: Recruiting. Available from: <https://clinicaltrials.gov/ct2/show/NCT04026113> [Accessed 11 August 2020].
- 142 Clinicaltrials.gov. *Linaclotide Safety and Efficacy in 2 to 5-Year-Old Participants With Functional Constipation*. Trial ID: NCT04110145. 2019. Status: Recruiting. Available from: <https://clinicaltrials.gov/ct2/show/NCT04110145> [Accessed 11 August 2020].
- 143 EU Clinical Trials Register. *A Multicentre- Long-term Safety- Efficacy and Pharmacokinetics Study of Lubiprostone in Paediatric Subjects Aged 6 years to <18 years with Functional Constipation*. Trial ID: 2013-004384-31/PL. 2016. Status: Completed. Available from: [Accessed 11 August 2020].
- 144 EU Clinical Trials Register. *A Multicentre- Randomised- Placebo-controlled- Double-blinded Study of the Efficacy-Safety- and Pharmacokinetics of Lubiprostone in Paediatric Subjects Aged 6 Years to < 18 Years with Functional Constipation*. Trial ID: 2013-003468-30/PL. 2015. Status: Completed. Available from: [Accessed 11 August 2020].
- 145 EU Clinical Trials Register. *A Phase 3- Multicenter- Randomized- Double-blind- Placebo-controlled- Parallel-group-Safety and Efficacy Study of Linaclotide Administered Orally to Children- Ages 6 to 17 Years- With Functional Constipation (FC); Linaclotide Safety and Efficacy Functional Constipation (FC)- in Pediatric Participants- 6 to 17 Yea*. Trial ID: 2019-001500-38/GB. 2020. Status: Ongoing. Available from: [Accessed 11 August 2020].
- 146 Clinicaltrials.gov. *A Safety and Efficacy Study of a Range of Linaclotide Doses Administered Orally to Children Ages 6-17 Years Who Fulfill Modified Rome III Criteria for Child/Adolescent Functional Constipation (FC)*. Trial ID: NCT02559570. 2015. Status: Completed. Available from: <https://clinicaltrials.gov/ct2/show/NCT02559570> [Accessed 11 August 2020].

- 147 Clinicaltrials.gov. *A Safety and Efficacy Evaluation of BLI400 Laxative in Constipated Adolescent Subjects*. Trial ID: NCT02665728. 2015. Status: Completed. Available from: <https://clinicaltrials.gov/ct2/show/NCT02665728> [Accessed 11 August 2020].
- 148 ISRCTN Registry. *A multicentre pragmatic clinical investigation to assess the efficacy of TransiCap MRI marker devices in magnetic resonance imaging when used to determine whole gut transit time- and inform treatment selection in paediatric constipation*. Trial ID: ISRCTN42273449. 2020. Status: Recruiting. Available from: <https://www.isrctn.com/ISRCTN42273449> [Accessed 11 August 2020].
- 149 Clinicaltrials.gov. *Defecation Function and Quality of Life in the Patients Treated With Surgery for Slow Transit Constipation*. Trial ID: NCT04304183. 2019. Status: Recruiting. Available from: <https://clinicaltrials.gov/ct2/show/NCT04304183> [Accessed 11 August 2020].
- 150 Australian New Zealand Clinical Trials Registry (ANZCTR). *Optimising balloon expulsion testing and sensory testing in patients with faecal incontinence and chronic constipation*. Trial ID: ACTRN12618000846224. 2019. Status: Recruiting. Available from: [Accessed 11 August 2020].
- 151 ISRCTN Registry. *Waiting list controlled trial of surgical treatment for adults with chronic constipation*. Trial ID: ISRCTN11747152. 2015. Status: Ongoing. Available from: <https://www.isrctn.com/ISRCTN11747152> [Accessed 11 August 2020].
- 152 Clinical Trials Registry - India (CTRI). *To compare the effectiveness of two types of laxatives namely Polyethylene Glycol 3350 vs. Lactulose for treatment of constipation in Indian Children*. Trial ID: CTRI/2018/01/011061. 2018. Status: Not Available. Available from: [Accessed 11 August 2020].
- 153 Clinical Trials Registry - India (CTRI). *Trial of combination of polyethylene glycol with or without sodium picosulphate for treatment of constipation in children*. Trial ID: CTRI/2018/01/011262. 2018. Status: Not Available. Available from: [Accessed 11 August 2020].
- 154 Mohamed H, Wayne C, Weir A, Partridge EA, Langer JC, Nasr A. Tube cecostomy versus appendicostomy for antegrade enemas in the management of fecal incontinence in children: A systematic review. *Journal of Pediatric Surgery*. 2020;25:25. Available from: <https://dx.doi.org/10.1016/j.jpedsurg.2020.01.011>.
- 155 Brazzelli M, Shirran E, Vale L. Absorbent products for containing urinary and/or fecal incontinence in adults. *Journal of Wound Ostomy and Continence Nursing*. 2002;29(1):45-54. Available from: <https://doi.org/10.1067/mjw.2002.120870>.
- 156 Fader M, Cottenden AM, Getliffe K. Absorbent products for moderate-heavy urinary and/or faecal incontinence in women and men. *Cochrane Database of Systematic Reviews*. 2008(4). Available from: <https://doi.org/10.1002/14651858.CD007408>.
- 157 Shirran E, Brazzelli M. Absorbent products for the containment of urinary and/or faecal incontinence in adults. *Cochrane Database of Systematic Reviews*. 2000(2):CD001406. Available from: <https://www.cochranelibrary.com/cdsr/doi/10.1002/14651858.CD001406/full>.
- 158 Yaping L. Barrier products in the treatment of incontinence-associated dermatitis. *Nursing Standard*. 2016;30(47):59-67. Available from: <http://doi.org.uk/10.7748/ns.2016.e10298>.
- 159 Pather P, Hines S, Kynoch K, Coyer F. Effectiveness of topical skin products in the treatment and prevention of incontinence-associated dermatitis: a systematic review. *JBI Database of Systematic Reviews and Implementation Reports*. 2017;15(5):1473-96. Available from: <https://dx.doi.org/10.11124/JBISRIR-2016-003015>.
- 160 Coyer F, Campbell J. Incontinence-associated dermatitis in the critically ill patient: an intensive care perspective. *Nursing in Critical Care*. 2018;23(4):198-206. Available from: <http://doi.org/10.1111/nicc.12331>.
- 161 Beeckman D, Van Damme N, Schoonhoven L, Van Lancker A, Kottner J, Beele H, et al. Interventions for preventing and treating incontinence-associated dermatitis in adults. *Cochrane Database of Systematic Reviews*. 2016(11). Available from: <https://doi.org/10.1002/14651858.CD011627.pub2>.
- 162 Beeckman D, Schoonhoven L, Verhaeghe S, Heyneman A, Defloor T. Prevention and treatment of incontinence-associated dermatitis: Literature review. *Journal of Advanced Nursing*. 2009;65(6):1141-54. Available from: <https://dx.doi.org/10.1111/j.1365-2648.2009.04986.x>.
- 163 Chodez M, Trilling B, Thuillier C, Boillot B, Barbois S, Faucheron JL. Results of sacral nerve neuromodulation for double incontinence in adults. *Techniques in Coloproctology*. 2014;18(12):1147-51. Available from: <https://dx.doi.org/10.1007/s10151-014-1231-z>.
- 164 Gonzalez-Consuegra RV, Mora-Carvajal LH, Celis-Moreno JS, Matiz-Vera GD. Incontinence-associated dermatitis: a problem without definition, systematic review [In Spanish]. *Revista de la Facultad de Medicina*. 2015;63(2):199-208. Available from: <http://ksrevidencia.com/article/KSRA74202>.
- 165 Australian New Zealand Clinical Trials Registry (ANZCTR). *Efficacy of Incontinence Associated Dermatitis Interventions for Critically Ill Patients in Intensive Care: the Distinct Pilot Randomised Control Trial*. Trial ID: ACTRN12617000537358. 2017. Status: Completed. Available from: [Accessed 11 August 2020].
- 166 Clinicaltrials.gov. *Treatment of Incontinence Associated Dermatitis - Automated (TRIAD-A)*. Trial ID: NCT03046810. 2017. Status: Recruiting. Available from: <https://clinicaltrials.gov/ct2/show/NCT03046810> [Accessed 11 August 2020].
- 167 ISRCTN Registry. *Development of a manual to guide care for people with incontinence to prevent or treat incontinence associated dermatitis (sore skin)- part 3*. Trial ID: ISRCTN70866724. 2021. Status: Not Yet Recruiting. Available from: <https://www.isrctn.com/ISRCTN70866724> [Accessed 11 August 2020].

- 168 Australian New Zealand Clinical Trials Registry (ANZCTR). *An investigation of the clinical utility of the electronic toilet top bidet for use with Australian nursing home residents and staff*. Trial ID: ACTRN12615000749505. 2015. Status: Completed. Available from: [Accessed 11 August 2020].
- 169 Omar MI, Alexander CE. Drug treatment for faecal incontinence in adults. *Cochrane Database of Systematic Reviews*. 2013(6). Available from: <https://doi.org/10.1002/14651858.CD002116.pub2>.
- 170 Fragkos KC, Zarate-Lopez N, Frangos CC. What about clonidine for diarrhoea? A systematic review and meta-analysis of its effect in humans. *Therapeutic Advances in Gastroenterology*. 2016;9(3):282-301. Available from: <https://dx.doi.org/10.1177/1756283X15625586>.
- 171 Chaichanavichkij P, Vollebregt PF, Scott SM, Knowles CH. Botulinum toxin type A for the treatment of dyssynergic defaecation in adults: a systematic review. *Colorectal Disease*. 2020;Epub ahead of print. Available from: <https://doi.org/10.1111/codi.15120>.
- 172 Clinicaltrials.gov. *Effect and Tolerance of Botulinum A Toxin Rectal Injections on Fecal Incontinence (FL\_TOXIN)*. Trial ID: NCT02414425. 2015. Status: Other. Available from: <https://clinicaltrials.gov/ct2/show/NCT02414425> [Accessed 11 August 2020].
- 173 Soyer T. Prevention and management of complications in various antegrade enema procedures in children: A review of the literature. *Pediatric Surgery International*. 2020;36(6):657-68. Available from: <http://dx.doi.org/10.1007/s00383-020-04635-x>.
- 174 Australian New Zealand Clinical Trials Registry (ANZCTR). *Does the type of enema administration affect time to complete bowel care in people with recent Spinal Cord Injury?* Trial ID: ACTRN12618000221257. 2018. Status: Recruiting. Available from: [Accessed 11 August 2020].
- 175 Clinicaltrials.gov. *A Within Subjects Comparison of Two Antegrade Flushing Regimens in Children*. Trial ID: NCT02435069. 2016. Status: Completed. Available from: <https://clinicaltrials.gov/ct2/show/NCT02435069> [Accessed 11 August 2020].
- 176 Bach FL, Sairally BZF, Latthe P. Effect of oestrogen therapy on faecal incontinence in postmenopausal women: a systematic review. *International Urogynecology Journal*. 2020;31(7):1289-97. Available from: <https://dx.doi.org/10.1007/s00192-020-04252-1>.
- 177 Clinicaltrials.gov. *A Study of Colesevelam in Fecal Incontinence*. Trial ID: NCT02628626. 2015. Status: Recruiting. Available from: <https://clinicaltrials.gov/ct2/show/NCT02628626> [Accessed 11 August 2020].
- 178 Clinicaltrials.gov. *Does Single Dose Imipramine Affect the Opening Pressure of the Urethral and Anal Sphincter?* Trial ID: NCT03102645. 2017. Status: Completed. Available from: <https://clinicaltrials.gov/ct2/show/NCT03102645> [Accessed 11 August 2020].
- 179 Clinicaltrials.gov. *An Interdisciplinary Approach to the Treatment of Encopresis in Children With Autism Spectrum Disorders*. Trial ID: NCT02383758. 2015. Status: Completed. Available from: <https://clinicaltrials.gov/ct2/show/NCT02383758> [Accessed 11 August 2020].
- 180 Gurusamy KS, Marzouk D, Benziger H. A review of contemporary surgical alternatives to permanent colostomy. *International Journal of Surgery*. 2005;3(3):193-205. Available from: <https://doi.org/10.1016/j.ijssu.2005.07.004>.
- 181 Adelaide Health Technology Assessment. *Placement of artificial bowel sphincters in the management of faecal incontinence*. Canberra, Australia: Medical Services Advisory Committee, Department of Health and Ageing; 2003. Available from: [http://www.msac.gov.au/internet/msac/publishing.nsf/Content/ABBD702EA07B1AA9CA2575AD0082FD07/\\$File/1107-Assessment-Report.pdf](http://www.msac.gov.au/internet/msac/publishing.nsf/Content/ABBD702EA07B1AA9CA2575AD0082FD07/$File/1107-Assessment-Report.pdf).
- 182 Mundy L, Merlin TL, Maddern GJ, Hiller JE. Systematic review of safety and effectiveness of an artificial bowel sphincter for faecal incontinence. *British Journal of Surgery*. 2004;91(6):665-72. Available from: <https://doi.org/10.1053/bjs.2004.3111>.
- 183 Clinicaltrials.gov. *Treatment of Anal Incontinence With Intersphincteric Implants*. Trial ID: NCT03080753. 2017. Status: Active- Not Recruiting. Available from: <https://clinicaltrials.gov/ct2/show/NCT03080753> [Accessed 11 August 2020].
- 184 Lian W, Zheng Y, Huang H, Chen L, Cao B. Effects of bariatric surgery on pelvic floor disorders in obese women: a meta-analysis. *Archives of Gynecology and Obstetrics*. 2017;296(2):181-9. Available from: <https://dx.doi.org/10.1007/s00404-017-4415-8>.
- 185 Poylin V, Serrot FJ, Madoff RD, Ikramuddin S, Mellgren A, Lowry AC, et al. Obesity and bariatric surgery: a systematic review of associations with defecatory dysfunction. *Colorectal Disease*. 2011;13(6):e92-103. Available from: <https://dx.doi.org/10.1111/j.1463-1318.2011.02584.x>.
- 186 Montenegro M, Slongo H, Juliato CRT, Minassian VA, Tavakkoli A, Brito LGO. The impact of bariatric surgery on pelvic floor dysfunction: A systematic review. *The Journal of Minimally Invasive Gynecology*. 2019;26(5):816-25. Available from: <https://dx.doi.org/10.1016/j.jmig.2019.01.013>.
- 187 Chapman AE, Geerdes B, Hewett P, Young J, Evers T, Kiroff G, et al. Systematic review of dynamic graciloplasty in the treatment of faecal incontinence. *British Journal of Surgery*. 2002;89(2):138-53. Available from: <https://doi.org/10.1046/j.1365-2168.2002.02018.x>.
- 188 Medical Services Advisory Committee. *Intersphincteric injection of silicone biomaterial for severe passive faecal incontinence*. Australia: Medical Services Advisory Committee (MSAC); 2006. Available from: [http://www.msac.gov.au/internet/msac/publishing.nsf/Content/ABBD702EA07B1AA9CA2575AD0082FD07/\\$File/1107-Assessment-Report.pdf](http://www.msac.gov.au/internet/msac/publishing.nsf/Content/ABBD702EA07B1AA9CA2575AD0082FD07/$File/1107-Assessment-Report.pdf).



- 189 Hong KD, Kim JS, Ji WB, Um JW. Midterm outcomes of injectable bulking agents for fecal incontinence: a systematic review and meta-analysis. *Techniques in Coloproctology*. 2017;21(3):203-10. Available from: <https://dx.doi.org/10.1007/s10151-017-1593-0>.
- 190 Maeda Y, Laurberg S, Norton C. Perianal injectable bulking agents as treatment for faecal incontinence in adults. *Cochrane Database of Systemic Reviews*. 2013(2):CD007959. Available from: <https://dx.doi.org/10.1002/14651858.CD007959.pub3>.
- 191 Hussain ZI, Lim M, Stojkovic SG. Systematic review of perianal implants in the treatment of faecal incontinence. *British Journal of Surgery*. 2011;98(11):1526-36. Available from: <https://dx.doi.org/10.1002/bjs.7645>.
- 192 Luo C, Samaranyake CB, Plank LD, Bissett IP. Systematic review on the efficacy and safety of injectable bulking agents for passive faecal incontinence. *Colorectal Disease*. 2010;12(4):296-303. Available from: <https://dx.doi.org/10.1111/j.1463-1318.2009.01828.x>.
- 193 Winkler R. Injectable bulking agents for faecal incontinence: systematic review [In German]. *Ludwig Boltzmann Institut Health Technology Assessment*. 2015;87. Available from: [http://ksrevidence.com/article/KSRA111493https://eprints.aihta.at/1059/1/DSD\\_87.pdf](http://ksrevidence.com/article/KSRA111493https://eprints.aihta.at/1059/1/DSD_87.pdf).
- 194 Clinicaltrials.gov. *Bulking Agent Versus Electrostimulation Therapy in Anal Incontinence (Bulking)*. Trial ID: NCT03052946. 2018. Status: Not Yet Recruiting. Available from: <https://clinicaltrials.gov/ct2/show/NCT03052946> [Accessed 11 August 2020].
- 195 Clinicaltrials.gov. *Fat Grafting Technique for Fecal Incontinence*. Trial ID: NCT03882632. 2019. Status: Recruiting. Available from: <https://clinicaltrials.gov/ct2/show/NCT03882632> [Accessed 11 August 2020].
- 196 ISRCTN Registry. *SaFaRI: Sacral nerve stimulation versus the FENIX TM magnetic sphincter augmentation for adult faecal incontinence: a randomised Investigation*. Trial ID: ISRCTN16077538. 2015. Status: Completed. Available from: <https://www.isrctn.com/ISRCTN16077538> [Accessed 11 August 2020].
- 197 Hong KD, Dasilva G, Kalaskar SN, Chong Y, Wexner SD. Long-term outcomes of artificial bowel sphincter for fecal incontinence: a systematic review and meta-analysis. *Journal of American College of Surgeons*. 2013;217(4):718-25. Available from: <https://dx.doi.org/10.1016/j.jamcollsurg.2013.04.028>.
- 198 Clinicaltrials.gov. *PRP Injection Into Anal Sphincters for Fecal Incontinence*. Trial ID: NCT04063293. 2019. Status: Recruiting. Available from: <https://clinicaltrials.gov/ct2/show/NCT04063293> [Accessed 11 August 2020].
- 199 Hocevar B, Gray M. Intestinal diversion (colostomy or ileostomy) in patients with severe bowel dysfunction following spinal cord injury. *Journal of Wound, Ostomy and Continence Nursing*. 2008;35(2):159-66. Available from: <https://dx.doi.org/10.1097/01.WON.0000313638.29623.40>.
- 200 Clinicaltrials.gov. *Transcutaneous Posterior Nerve Stimulation in Treatment of Fecal Incontinence*. Trial ID: NCT04478799. 2017. Status: Completed. Available from: <https://clinicaltrials.gov/ct2/show/NCT04478799> [Accessed 11 August 2020].
- 201 Clinicaltrials.gov. *Radiofrequency in Anal Incontinence: Randomized Clinical Trials*. Trial ID: NCT03147729. 2015. Status: Other. Available from: <https://clinicaltrials.gov/ct2/show/NCT03147729> [Accessed 11 August 2020].
- 202 Emile SH, Elfeki H, Shalaby M, Sakr A, Sileri P, Wexner SD. Outcome of laparoscopic ventral mesh rectopexy for full-thickness external rectal prolapse: a systematic review, meta-analysis, and meta-regression analysis of the predictors for recurrence. *Surgical Endoscopy*. 2019;33(8):2444-55. Available from: <https://ovidsp.ovid.com/ovidweb.cgi?T=JS&CSC=Y&NEWS=N&PAGE=fulltext&D=medl&AN=31041515http://libra ry.ncl.ac.uk/openurl/?sid=OVID&isbn=&issn=0930-2794&volume=33&issue=8&date=2019&title=Surgical+Endoscopy&atitle=Outcome+of+laparoscopic+ventral+me sh+rectopex> <https://dx.doi.org/10.1007/s00464-019-06803-0>.
- 203 Grimes CL, Schimpf MO, Wieslander CK, Sleemi A, Doyle P, Wu YM, et al. Surgical interventions for posterior compartment prolapse and obstructed defecation symptoms: A systematic review with clinical practice recommendations. *International Urogynecology Journal*. 2019;30(9):1433-54. Available from: <https://dx.doi.org/10.1007/s00192-019-04001-z>.
- 204 Emile SH, Elfeki HA, Youssef M, Farid M, Wexner SD. Abdominal rectopexy for the treatment of internal rectal prolapse: a systematic review and meta-analysis. *Colorectal Disease*. 2017;19(1):O13-O24. Available from: <https://dx.doi.org/10.1111/codi.13574>.
- 205 Emile SH, Elfeki H, Shalaby M, Sakr A, Sileri P, Wexner SD. Perineal resectional procedures for the treatment of complete rectal prolapse: A systematic review of the literature. *International Journal of Surgery*. 2017;46:146-54. Available from: <https://dx.doi.org/10.1016/j.ijsu.2017.09.005>.
- 206 Albayati S, Chen P, Morgan MJ, Toh JWT. Robotic vs. laparoscopic ventral mesh rectopexy for external rectal prolapse and rectal intussusception: a systematic review. *Techniques in Coloproctology*. 2019;23(6):529-35. Available from: <http://dx.doi.org/10.1007/s10151-019-02014-w>.
- 207 Tou S, Brown SR, Nelson RL. Surgery for complete (full-thickness) rectal prolapse in adults. *Cochrane Database of Systemic Reviews*. 2015(11). Available from: <https://doi.org/10.1002/14651858.CD001758.pub3>.
- 208 Samaranyake CB, Luo C, Plank AW, Merrie AE, Plank LD, Bissett IP. Systematic review on ventral rectopexy for rectal prolapse and intussusception. *Colorectal Disease*. 2010;12(6):504-12. Available from: <https://dx.doi.org/10.1111/j.1463-1318.2009.01934.x>.

- 209 Clinicaltrials.gov. *Laparoscopic Ventral Mesh Rectopexy Combined With or Without Stapled Trans-anal Rectal Resection for Obstructed Defecation Syndrome*. Trial ID: NCT03060330. 2017. Status: Recruiting. Available from: <https://clinicaltrials.gov/ct2/show/NCT03060330> [Accessed 11 August 2020].
- 210 Thomas GP, Bradshaw E, Vaizey CJ. A review of sacral nerve stimulation for faecal incontinence following rectal surgery and radiotherapy. *Colorectal Disease*. 2015;17(11):939-42. Available from: <https://dx.doi.org/10.1111/codi.13069>.
- 211 Ramage L, Qiu S, Kontovounisios C, Tekkis P, Rasheed S, Tan E. A systematic review of sacral nerve stimulation for low anterior resection syndrome. *Colorectal Disease*. 2015;17(9):762-71. Available from: <https://dx.doi.org/10.1111/codi.12968>.
- 212 Mirbagheri N, Sivakumaran Y, Nassar N, Gladman MA. Systematic review of the impact of sacral neuromodulation on clinical symptoms and gastrointestinal physiology. *ANZ Journal of Surgery*. 2016;86(4):232-6. Available from: <https://dx.doi.org/10.1111/ans.13257>.
- 213 Ram E, Meyer R, Carter D, Gutman M, Rosin D, Horesh N. The efficacy of sacral neuromodulation in the treatment of low anterior resection syndrome: a systematic review and meta-analysis. *Techniques in Coloproctology*. 2020;24(8):803-15. Available from: <https://dx.doi.org/10.1007/s10151-020-02231-8>.
- 214 Zhu Y, Wu G, Zhang J, Yan W, Han M, Zhang H, et al. Meta-analysis of sacral nerve stimulation for fecal incontinence [In Chinese]. *Zhonghua Wei Chang Wai Ke Za Zhi*. 2017;20(12):1417-21. Available from: <https://doi.org/10.3727/096368917X695038>.
- 215 Clinicaltrials.gov. *Effectiveness of Sacral Neuromodulation in Low Anterior Resection Syndrome (SANLARS)*. Trial ID: NCT03598231. 2018. Status: Recruiting. Available from: <https://clinicaltrials.gov/ct2/show/NCT03598231> [Accessed 11 August 2020].
- 216 Clinicaltrials.gov. *Percutaneous Nerve Evaluation With Fluoroscopy Versus Without*. Trial ID: NCT02677753. 2016. Status: Completed. Available from: <https://clinicaltrials.gov/ct2/show/NCT02677753> [Accessed 11 August 2020].
- 217 ISRCTN Registry. *Reducing radiation exposure during InterStim lead placement*. Trial ID: ISRCTN37385347. 2015. Status: Completed. Available from: <https://www.isrctn.com/ISRCTN37385347> [Accessed 11 August 2020].
- 218 Clinicaltrials.gov. *Sacral Nerve Stimulation for Faecal Incontinence - Placebo or Clinical Effective (SNS)*. Trial ID: NCT03261622. 2016. Status: Recruiting. Available from: <https://clinicaltrials.gov/ct2/show/NCT03261622> [Accessed 11 August 2020].
- 219 Clinicaltrials.gov. *Sacral Nerve Stimulation in Treating Low Anterior Resection Syndrome or Fecal Incontinence in Patients With Locally Advanced Rectal Cancer or Other Pelvic Cancer- the RESTORE Study*. Trial ID: NCT04066894. 2019. Status: Recruiting. Available from: <https://clinicaltrials.gov/ct2/show/NCT04066894> [Accessed 11 August 2020].
- 220 ISRCTN Registry. *Subsensory sacral neuromodulation for incontinence*. Trial ID: ISRCTN98760715. 2017. Status: Recruiting. Available from: <https://www.isrctn.com/ISRCTN98760715> [Accessed 11 August 2020].
- 221 Australian New Zealand Clinical Trials Registry (ANZCTR). *In vivo characterisation of pressure wave propagation in the rectosigmoid region as a target for neuromodulation for faecal incontinence*. Trial ID: ACTRN12615001137583. 2015. Status: Recruiting. Available from: [Accessed 11 August 2020].
- 222 Clinicaltrials.gov. *Sacral Neuromodulation as Treatment for Fecal Incontinence (LLLT-FI)*. Trial ID: NCT03825575. 2019. Status: Recruiting. Available from: <https://clinicaltrials.gov/ct2/show/NCT03825575> [Accessed 11 August 2020].
- 223 Tan EK, Jacovides M, Khullar V, Teoh TG, Fernando RJ, Tekkis PP. A cost-effectiveness analysis of delayed sphincteroplasty for anal sphincter injury. *Colorectal Disease*. 2008;10(7):653-62. Available from: <https://dx.doi.org/10.1111/j.1463-1318.2008.01507.x>.
- 224 Clinicaltrials.gov. *Transperineal Repair of Primary Obstetric Rectovaginal Fistulas*. Trial ID: NCT04267757. 2018. Status: Completed. Available from: <https://clinicaltrials.gov/ct2/show/NCT04267757> [Accessed 11 August 2020].
- 225 Glasgow SC, Lowry AC. Long-term outcomes of anal sphincter repair for fecal incontinence: a systematic review. *Diseases of the Colon & Rectum*. 2012;55(4):482-90. Available from: <https://dx.doi.org/10.1097/DCR.0b013e3182468c22>.
- 226 Clinicaltrials.gov. *High-need Community Older Adults Care Delivery Model (HCOACDM)*. Trial ID: NCT03864471. 2019. Status: Completed. Available from: <https://clinicaltrials.gov/ct2/show/NCT03864471> [Accessed 11 August 2020].
- 227 Ousey K, Gillibrand W, Lui S. Effective management of acute faecal incontinence in hospital: review of continence management systems. *Frontline Gastroenterology*. 2010;1(2):94-7. Available from: <https://dx.doi.org/10.1136/fg.2009.001206>.
- 228 Roe B, Flanagan L, Jack B, Barrett J, Chung A, Shaw C, et al. Systematic review of the management of incontinence and promotion of continence in older people in care homes: descriptive studies with urinary incontinence as primary focus. *Journal of Advanced Nursing*. 2011;67(2):228-50. Available from: <https://dx.doi.org/10.1111/j.1365-2648.2010.05481.x>.
- 229 Buono K, Dave-Heliker B. Mechanical inserts for the treatment of faecal incontinence: A systematic review. *Arab Journal of Urology*. 2019;17(1):69-76. Available from: <https://dx.doi.org/10.1080/2090598X.2019.1589776>.
- 230 Deutekom M, Dobben AC. Plugs for containing faecal incontinence. *Cochrane Database of Systematic Reviews*. 2015(7). Available from: <http://doi.org/10.1002/14651858.CD005086.pub4>.

- 231 Australian New Zealand Clinical Trials Registry (ANZCTR). *Comparing the use of a containment product for the treatment of faecal incontinence (IFI) in stroke survivors versus standard faecal incontinence (FI) care in a rehabilitation setting*. Trial ID: ACTRN12617000727347. 2017. Status: Recruiting. Available from: [Accessed 11 August 2020].
- 232 Clinicaltrials.gov. *Safety and Effectiveness Evaluation of the ForConti Contix Fecal Incontinence Management System (FIMS)*. Trial ID: NCT03813251. 2019. Status: Not Yet Recruiting. Available from: <https://clinicaltrials.gov/ct2/show/NCT03813251> [Accessed 11 August 2020].
- 233 Clinicaltrials.gov. *Safety and Effectiveness Evaluation of the ForConti Fecal Management System - Pilot Study*. Trial ID: NCT02865291. 2015. Status: Invitation. Available from: <https://clinicaltrials.gov/ct2/show/NCT02865291> [Accessed 11 August 2020].
- 234 Zhang Y, Leng M, Guo J, Duan J, Wang Z. The effectiveness of faecal collection devices in preventing incontinence-associated dermatitis in critically ill patients with faecal incontinence: A systematic review and meta-analysis. *Australian Critical Care*. 2020;34(1):103-12. Available from: <https://dx.doi.org/10.1016/j.aucc.2020.04.152>.
- 235 Clinical Trials Registry - India (CTRI). *A study to evaluate the clinical and health economic effectiveness of a novel device for faecal management in bedridden patients with little to no bowel control*. Trial ID: CTRI/2017/02/007831. 2016. Status: Not Available. Available from: [Accessed 11 August 2020].
- 236 Clinicaltrials.gov. *The Use of an 'Anal-Tape' in Patients With Fecal Incontinence*. Trial ID: NCT02989545. 2016. Status: Invitation. Available from: <https://clinicaltrials.gov/ct2/show/NCT02989545> [Accessed 11 August 2020].
- 237 Clinical Trials Registry - India (CTRI). *A study for evaluation of caregiver acceptability of a device for stool management in bed ridden patients*. Trial ID: CTRI/2017/03/007982. 2017. Status: Not Available. Available from: [Accessed 11 August 2020].
- 238 Clinicaltrials.gov. *A Clinical Evaluation of the Eclipse System- a Vaginal Bowel Control (VBC) Therapy for Fecal Incontinence in Women (LIBERATE)*. Trial ID: NCT02428595. 2015. Status: Completed. Available from: <https://clinicaltrials.gov/ct2/show/NCT02428595> [Accessed 11 August 2020].
- 239 Clinicaltrials.gov. *Pursuit: Real World Use of the Eclipse System (PURSUIT)*. Trial ID: NCT03940573. 2019. Status: Recruiting. Available from: <https://clinicaltrials.gov/ct2/show/NCT03940573> [Accessed 11 August 2020].
- 240 Clinicaltrials.gov. *Incontinence Management System ICU Field Evaluation*. Trial ID: NCT03628833. 2018. Status: Completed. Available from: <https://clinicaltrials.gov/ct2/show/NCT03628833> [Accessed 11 August 2020].
- 241 Gray TG, Vickers H, Jha S, Jones GL, Brown SR, Radley SC. A systematic review of non-invasive modalities used to identify women with anal incontinence symptoms after childbirth. *International Urogynecology Journal*. 2019;30(6):869-79. Available from: <https://dx.doi.org/10.1007/s00192-018-3819-8>.
- 242 Woodley SJ, Lawrenson P, Boyle R, Cody JD, Mørkved S, Kernohan A, et al. Pelvic floor muscle training for preventing and treating urinary and faecal incontinence in antenatal and postnatal women. *Cochrane Database of Systematic Reviews*. 2020(5). Available from: <https://doi.org/10.1002/14651858.CD007471.pub4>.
- 243 Fallon A, Westaway J, Moloney C. A systematic review of psychometric evidence and expert opinion regarding the assessment of faecal incontinence in older community-dwelling adults. *International Journal of Evidence-Based Healthcare*. 2008;6(2):225-59. Available from: <https://dx.doi.org/10.1111/j.1744-1609.2008.00088.x>.
- 244 Yeap ZH, Simillis C, Qiu S, Ramage L, Kontovounisios C, Tekkis P. Diagnostic accuracy of anorectal manometry for fecal incontinence: a meta-analysis. *Acta Chirurgica Belgica*. 2017;117(6):347-55. Available from: <https://dx.doi.org/10.1080/00015458.2017.1394674>.
- 245 D'Amico F, Wexner SD, Vaizey CJ, Gouynou C, Danese S, Peyrin-Biroulet L. Tools for fecal incontinence assessment: lessons for inflammatory bowel disease trials based on a systematic review. *United European Gastroenterology Journal*. 2020;8(8):886-922. Available from: <https://dx.doi.org/10.1177/2050640620943699>.
- 246 Clinicaltrials.gov. *Comparison of Anorectal Manometry and 3D Manometry in Diagnosis of Functional Disorders in Children*. Trial ID: NCT02812823. 2018. Status: Recruiting. Available from: <https://clinicaltrials.gov/ct2/show/NCT02812823> [Accessed 11 August 2020].
- 247 Clinicaltrials.gov. *Studies in Patients With Defecatory Disorders*. Trial ID: NCT03317938. 2017. Status: Recruiting. Available from: <https://clinicaltrials.gov/ct2/show/NCT03317938> [Accessed 11 August 2020].
- 248 Clinicaltrials.gov. *Fecal Microbial Transplantation for the Treatment of Fecal Incontinence in Women (FMT for FI)*. Trial ID: NCT04201821. 2020. Status: Not Yet Recruiting. Available from: <https://clinicaltrials.gov/ct2/show/NCT04201821> [Accessed 11 August 2020].



### **Supplementary Appendix 8:** Reasons for exclusion for horizon scanning

Detailed below are the clinical trials references identified through horizon scanning searches subsequently excluded. Exclusion was for one of the following reasons indicated in order of hierarchical importance:

|                                                                    |          |
|--------------------------------------------------------------------|----------|
| Records removed after filtration by trial status (n=52)            | 1-52     |
| Records excluded based on primary health condition studied (n=863) | 53-915   |
| Study's exclusion criteria included FI (n=4)                       | 916-919  |
| Healthy subjects (n=2)                                             | 920, 921 |
| Questionnaire, screening and tool assessment validation (n=7)      | 922-928  |
| Not relevant/within the scope (n=9)                                | 929-937  |

### **References**

- 1 Clinical Trials Registry - India (CTRI). A study of cefepimetazobactam (FEPTAZ) in complicated urinary tract infection (cUTI) or acute pyelonephritis (AP). Trial ID: CTRI/2019/01/016861. 2019. Status: Suspended. Available from: <http://ctri.nic.in/Clinicaltrials/pmaindet2.php?trialid=27769> [Accessed 11 August 2020].
- 2 ISRCTN Registry. A study investigating a continuous local anaesthetic infusion for pain relief after pelvic tumour surgery. Trial ID: ISRCTN60374925. 2015. Status: Stopped. Available from: <http://www.isrctn.com/ISRCTN60374925> [Accessed 11 August 2020].
- 3 Clinicaltrials.gov. Efficacy and Safety of Polyethylene Glycol 3350 (PEG 3350) for Relief of Constipation (MK-8114-005). Trial ID: NCT02292459. 2014. Status: Withdrawn. Available from: <https://clinicaltrials.gov/ct2/show/record/NCT02292459> [Accessed 11 August 2020].
- 4 Clinicaltrials.gov. Surgery With or Without Postoperative Intensity Modulated Radiation Therapy in Treating Patients With Urothelial Bladder Cancer. Trial ID: NCT02316548. 2014. Status: Terminated. Available from: <https://clinicaltrials.gov/ct2/show/record/NCT02316548> [Accessed 11 August 2020].
- 5 Clinicaltrials.gov. Treatment of Septic Shock by Inhibiting Autodigestion and Preserving Gut Integrity With Enteric LB1148 (SSAIL). Trial ID: NCT02317549. 2014. Status: Terminated. Available from: <https://clinicaltrials.gov/ct2/show/record/NCT02317549> [Accessed 11 August 2020].
- 6 Clinicaltrials.gov. The Effect of Episiotomy on Maternal and Fetal Outcomes (EPITRIAL). Trial ID: NCT02356237. 2015. Status: Terminated. Available from: <https://clinicaltrials.gov/ct2/show/record/NCT02356237> [Accessed 11 August 2020].
- 7 Clinicaltrials.gov. Sacral Neuromodulation in Dual Incontinence: Ultrasound and Afferent Nerve Sensation Assessment (SaNDI). Trial ID: NCT02357784. 2015. Status: Suspended. Available from: <https://clinicaltrials.gov/ct2/show/record/NCT02357784> [Accessed 11 August 2020].
- 8 Clinicaltrials.gov. Dose Escalated MRSI Guided Radiation Therapy in Glioblastoma. Trial ID: NCT02394665. 2015. Status: Terminated. Available from: <https://clinicaltrials.gov/ct2/show/record/NCT02394665> [Accessed 11 August 2020].
- 9 Clinicaltrials.gov. Evaluation of Safety and Effectiveness of the FMwand Ferromagnetic Surgical System during total Mesorectal Excision Surgery. Trial ID: NCT02423174. 2015. Status: Withdrawn. Available from: <https://clinicaltrials.gov/ct2/show/record/NCT02423174> [Accessed 11 August 2020].
- 10 Clinicaltrials.gov. Unilateral Nerve-Sparing Cryoablation for Low-Risk- Clinically Localized- Unilateral Prostate Cancer (POTENT-C). Trial ID: NCT02459912. 2015. Status: Terminated. Available from: <https://clinicaltrials.gov/ct2/show/record/NCT02459912> [Accessed 11 August 2020].
- 11 Clinicaltrials.gov. The Influence of Probiotics on Body Weight and Composition (WLP). Trial ID: NCT02465294. 2015. Status: Withdrawn. Available from: <https://clinicaltrials.gov/ct2/show/record/NCT02465294> [Accessed 11 August 2020].
- 12 Clinicaltrials.gov. Comparison of Wash Wipes and Standard Care in the Prevention of Incontinence-associated Dermatitis in Elderly. Trial ID: NCT02475512. 2015. Status: Terminated. Available from: <https://clinicaltrials.gov/ct2/show/record/NCT02475512> [Accessed 11 August 2020].

- 13 Clinicaltrials.gov. Stereotactic Body Radiation Therapy and Transarterial Chemoembolization in Treating Patients With Liver Cancer That Cannot Be Removed by Surgery. Trial ID: NCT02507765. 2015. Status: Suspended. Available from: <https://clinicaltrials.gov/ct2/show/record/NCT02507765> [Accessed 11 August 2020].
- 14 Clinicaltrials.gov. Efficacy and Safety Study of Sirukumab in Patients With Giant Cell Arteritis. Trial ID: NCT02531633. 2015. Status: Terminated. Available from: <https://clinicaltrials.gov/ct2/show/record/NCT02531633> [Accessed 11 August 2020].
- 15 Clinicaltrials.gov. Talazoparib in Treating Patients With Advanced or Metastatic Solid Tumors That Cannot Be Removed by Surgery and Liver or Kidney Dysfunction. Trial ID: NCT02567396. 2015. Status: Withdrawn. Available from: <https://clinicaltrials.gov/ct2/show/record/NCT02567396> [Accessed 11 August 2020].
- 16 Clinicaltrials.gov. Treating Anorectal Dysfunction in MS. Trial ID: NCT02609607. 2015. Status: Terminated. Available from: <https://clinicaltrials.gov/ct2/show/record/NCT02609607> [Accessed 11 August 2020].
- 17 Clinicaltrials.gov. Ibrutinib or Idelalisib in Treating Patients With Persistent or Relapsed Chronic Lymphocytic Leukemia- Small Lymphocytic Lymphoma- or Non-Hodgkin Lymphoma After Donor Stem Cell Transplant. Trial ID: NCT02662296. 2016. Status: Withdrawn. Available from: <https://clinicaltrials.gov/ct2/show/record/NCT02662296> [Accessed 11 August 2020].
- 18 Clinicaltrials.gov. AlloGeneic Human Mesenchymal Stem Cells (hMSC) in Patients With Fistulizing Crohn's Disease Via Perifistula injections (GALENE) (GALENE). Trial ID: NCT02677350. 2016. Status: Withdrawn. Available from: <https://clinicaltrials.gov/ct2/show/record/NCT02677350> [Accessed 11 August 2020].
- 19 Clinicaltrials.gov. Feasibility Study to Assess the Early Use of Porcine Cross-linked Collagen Paste in Cryptoglandular Anorectal Fistulas (FIX-IT1). Trial ID: NCT02686580. 2015. Status: Terminated. Available from: <https://clinicaltrials.gov/ct2/show/record/NCT02686580> [Accessed 11 August 2020].
- 20 Clinicaltrials.gov. Pilot Trial of the Effect of Vorinostat and AGS-004 on Persistent HIV-1 Infection (VORVAX). Trial ID: NCT02707900. 2016. Status: Terminated. Available from: <https://clinicaltrials.gov/ct2/show/record/NCT02707900> [Accessed 11 August 2020].
- 21 Clinicaltrials.gov. A Phase I- Dose Escalation Study of BNC101 in Patients With Metastatic Colorectal Cancer. Trial ID: NCT02726334. 2016. Status: Terminated. Available from: <https://clinicaltrials.gov/ct2/show/record/NCT02726334> [Accessed 11 August 2020].
- 22 Clinicaltrials.gov. Phase 4- Vedolizumab-4002 Post-marketing- Disease-Drug-Drug Interaction Study. Trial ID: NCT02760615. 2016. Status: Suspended. Available from: <https://clinicaltrials.gov/ct2/show/record/NCT02760615> [Accessed 11 August 2020].
- 23 Clinicaltrials.gov. BAFIARS - Biomedical Assessment of Function and Imaging of the Ano-rectal Sphincter. Trial ID: NCT02778048. 2016. Status: Suspended. Available from: <https://clinicaltrials.gov/ct2/show/record/NCT02778048> [Accessed 11 August 2020].
- 24 Clinicaltrials.gov. A Pilot Study of the Effects of Mirabegron on Symptoms in Patients With Interstitial Cystitis (MirabegronIC). Trial ID: NCT02787083. 2016. Status: Terminated. Available from: <https://clinicaltrials.gov/ct2/show/record/NCT02787083> [Accessed 11 August 2020].
- 25 Clinicaltrials.gov. A Phase II Study of High Dose Bolus IL2 in Patients With Inoperable Stage III or Stage IV Melanoma Who Have Failed Prior Anti-PD1 Immunotherapy: Efficacy and Biomarker Study. Trial ID: NCT02796352. 2016. Status: Terminated. Available from: <https://clinicaltrials.gov/ct2/show/record/NCT02796352> [Accessed 11 August 2020].
- 26 Clinicaltrials.gov. Tolerability- Safety and Efficacy of a New Frequency of Vibrant Capsule Administration. Trial ID: NCT02829047. 2016. Status: Terminated. Available from: <https://clinicaltrials.gov/ct2/show/record/NCT02829047> [Accessed 11 August 2020].
- 27 Clinicaltrials.gov. Tolerability- Safety- and Feasibility of Naloxegol in Patients With Cancer and OIC (Opioid Induced Constipation). Trial ID: NCT02839889. 2016. Status: Terminated. Available from: <https://clinicaltrials.gov/ct2/show/record/NCT02839889> [Accessed 11 August 2020].
- 28 Clinicaltrials.gov. Genetic Determinism of Epithelial Barrier Defects in Irritable Bowel Syndrome (PROTIBS). Trial ID: NCT02841878. 2015. Status: Withdrawn. Available from: <https://clinicaltrials.gov/ct2/show/record/NCT02841878> [Accessed 11 August 2020].
- 29 Clinicaltrials.gov. Ease of Use- Tolerability- Efficacy and Safety of the Vibrant Capsule Administered in the Home Environment. Trial ID: NCT02895516. 2016. Status: Withdrawn. Available from: <https://clinicaltrials.gov/ct2/show/record/NCT02895516> [Accessed 11 August 2020].
- 30 Clinicaltrials.gov. Study to Investigate the Safety- Pharmacokinetics- Pharmacodynamics and Preliminary Clinical Activity of Defactinib in Combination With Avelumab in Epithelial Ovarian Cancer. Trial ID: NCT02943317. 2016.

- Status: Terminated. Available from: <https://clinicaltrials.gov/ct2/show/record/NCT02943317> [Accessed 11 August 2020].
- 31 Clinicaltrials.gov. Olanzapine for the Treatment of Refractory Chronic Nausea and Vomiting. Trial ID: NCT02977741. 2016. Status: Withdrawn. Available from: <https://clinicaltrials.gov/ct2/show/record/NCT02977741> [Accessed 11 August 2020].
- 32 Clinicaltrials.gov. Vorinostat in Patients With Class 2 High Risk Uveal Melanoma. Trial ID: NCT03022565. 2016. Status: Withdrawn. Available from: <https://clinicaltrials.gov/ct2/show/record/NCT03022565> [Accessed 11 August 2020].
- 33 Clinicaltrials.gov. Evaluation of an Incontinence Product. Trial ID: NCT03023072. 2017. Status: Terminated. Available from: <https://clinicaltrials.gov/ct2/show/record/NCT03023072> [Accessed 11 August 2020].
- 34 Clinicaltrials.gov. A Pilot Study Of Ga-68-DOTA-TOC Imaging In Participants With Small Bowel Carcinoid Tumors. Trial ID: NCT03057509. 2017. Status: Withdrawn. Available from: <https://clinicaltrials.gov/ct2/show/record/NCT03057509> [Accessed 11 August 2020].
- 35 Clinicaltrials.gov. Utility of Bowel Ultrasound in Diagnosing Necrotizing Enterocolitis in Congenital Heart Disease. Trial ID: NCT03142685. 2017. Status: Withdrawn. Available from: <https://clinicaltrials.gov/ct2/show/record/NCT03142685> [Accessed 11 August 2020].
- 36 Clinicaltrials.gov. Tazemetostat in Treating Patients With Metastatic or Unresectable Solid Tumors or B-Cell Lymphomas With Liver Dysfunction. Trial ID: NCT03217253. 2017. Status: Withdrawn. Available from: <https://clinicaltrials.gov/ct2/show/record/NCT03217253> [Accessed 11 August 2020].
- 37 Clinicaltrials.gov. Trametinib in Patients With Advanced Neurofibromatosis Type 1 (NF1)-Mutant Non-small Cell Lung Cancer. Trial ID: NCT03232892. 2017. Status: Terminated. Available from: <https://clinicaltrials.gov/ct2/show/record/NCT03232892> [Accessed 11 August 2020].
- 38 Clinicaltrials.gov. Comparative Study to Assess an Advanced Skin Protectant in the Management of Incontinence-associated Dermatitis. Trial ID: NCT03298113. 2017. Status: Terminated. Available from: <https://clinicaltrials.gov/ct2/show/record/NCT03298113> [Accessed 11 August 2020].
- 39 Clinicaltrials.gov. The Use of Lactobacillus Reuteri in Functional Constipation in Children. Trial ID: NCT03333070. 2017. Status: Terminated. Available from: <https://clinicaltrials.gov/ct2/show/record/NCT03333070> [Accessed 11 August 2020].
- 40 Clinicaltrials.gov. HyGleaCare Procedure for Chronic Constipation. Trial ID: NCT03335969. 2017. Status: Withdrawn. Available from: <https://clinicaltrials.gov/ct2/show/record/NCT03335969> [Accessed 11 August 2020].
- 41 Clinicaltrials.gov. Effects of Eluxadoline (Viberzi ) 100 mg Twice Daily on Diarrhea-Associated Fecal Incontinence (ELXDFI). Trial ID: NCT03489265. 2018. Status: Withdrawn. Available from: <https://clinicaltrials.gov/ct2/show/record/NCT03489265> [Accessed 11 August 2020].
- 42 Clinicaltrials.gov. Effect of Real-world Tight Control Management of Inflammatory Bowel Disease. Trial ID: NCT03633669. 2018. Status: Withdrawn. Available from: <https://clinicaltrials.gov/ct2/show/record/NCT03633669> [Accessed 11 August 2020].
- 43 Clinicaltrials.gov. A Study of the Role of Circulating Tumor DNA in Predicting the Likelihood of Organ Preservation After Clinical Complete Response to Neoadjuvant Therapy for Rectal Cancer. Trial ID: NCT03749083. 2018. Status: Withdrawn. Available from: <https://clinicaltrials.gov/ct2/show/record/NCT03749083> [Accessed 11 August 2020].
- 44 Clinicaltrials.gov. Lanreotide Combined With Telotristat Ethyl or Placebo for the First-line Treatment in Patients With Advanced Well Differentiated Small Intestinal Neuroendocrine Tumours (siNET) With Highly-functioning Carcinoid Syndrome (TELEFIRST). Trial ID: NCT04065165. 2019. Status: Withdrawn. Available from: <https://clinicaltrials.gov/ct2/show/record/NCT04065165> [Accessed 11 August 2020].
- 45 Clinicaltrials.gov. Sandostatin (Octreotide LAR) May Lead to Clinical Improvement Through Receptor Occupation Optimisation (SCIROCCO). Trial ID: NCT04140409. 2019. Status: Terminated. Available from: <https://clinicaltrials.gov/ct2/show/record/NCT04140409> [Accessed 11 August 2020].
- 46 Australian New Zealand Clinical Trials Registry (ANZCTR). Assessing the quality of bowel preparation by addition of Movicol to standard bowel preparation regimen in patients undergoing routine colonoscopy: a randomized controlled trial. Trial ID: ACTRN12616000712404. 2016. Status: Terminated. Available from: <https://www.anzctr.org.au/Trial/Registration/TrialReview.aspx?id=369666&isReview=true> [Accessed 11 August 2020].
- 47 Australian New Zealand Clinical Trials Registry (ANZCTR). Efficacy of oral- capsulised- frozen faecal matter transplant for the treatment of clostridium difficile diarrhoea. Trial ID: ACTRN12616000746437p. 2016. Status: Withdrawn. Available from:

- <https://www.anzctr.org.au/Trial/Registration/TrialReview.aspx?id=370740&isReview=true> [Accessed 11 August 2020].
- 48 Australian New Zealand Clinical Trials Registry (ANZCTR). The Canadian version of the food for irritable bowel syndrome study. Trial ID: ACTRN12616001149459. 2016. Status: Terminated. Available from: <https://www.anzctr.org.au/Trial/Registration/TrialReview.aspx?id=371306&isReview=true> [Accessed 11 August 2020].
- 49 Australian New Zealand Clinical Trials Registry (ANZCTR). The effect of a low fermentable oligosaccharide-disaccharide- monosaccharide and polyol (FODMAP) diet on intestinal transit- the intestinal microbiome and metabolome in adults with irritable bowel syndrome.. Trial ID: ACTRN12617000465358. 2017. Status: Terminated. Available from: <https://www.anzctr.org.au/Trial/Registration/TrialReview.aspx?id=372644&isReview=true> [Accessed 11 August 2020].
- 50 Australian New Zealand Clinical Trials Registry (ANZCTR). Bugs'n'Bones Study: The relationship between your diet- gut bacteria and bones. Trial ID: ACTRN12617000802303. 2017. Status: Terminated. Available from: <https://www.anzctr.org.au/Trial/Registration/TrialReview.aspx?id=373020&isReview=true> [Accessed 11 August 2020].
- 51 EU Clinical Trials Register. Prospective study investigating efficacy of lanreotide on decrease of chemotherapy induced diarrhoea (CID) in patients with colorectal carcinoma. Prospektivn studie zkoumaj cinnost lanreotidu na sn en pr jmu vyvolan ho chemoterapi u pacient s kolorekt ln m karcinomem; STOPRHEA STOPRHEA. Trial ID: 2014-004473-16/CZ. 2016. Status: Prematurely Ended. Available from: <https://www.clinicaltrialsregister.eu/ctr-search/trial/2014-004473-16/CZ> [Accessed 11 August 2020].
- 52 EU Clinical Trials Register. A Phase II- multicentre- randomised- double-blind- placebo controlled- proof of concept study of efficacy and safety of Rifamycin SV-MMX 600 mg tablets administered three or two times daily to patients with diarrhoea-predominant irritable bowel syndrome (IBS-D) Estudio fase II de prueba de concepto- multic ntrico- aleatorizado- doble ciego y controlado con placebo de la eficacia y la seguridad de comprimidos de rifamicina SV-MMX 600 mg administrados tres o dos veces al d a a pacientes con s ndrome del intestino irritable con diarrea predominante (SII-D). Trial ID: 2016-004977-42/ES. 2017. Status: Temporarily Halted. Available from: <https://www.clinicaltrialsregister.eu/ctr-search/trial/2016-004977-42/ES> [Accessed 11 August 2020].
- 53 Clinicaltrials.gov. M-Vax + Low Dose Interleukin-2 Versus Placebo Vaccine in Metastatic Melanoma in Patients With Stage IV Melanoma. Trial ID: NCT00477906. 2007. Status: Not Yet Recruiting. Available from: <https://clinicaltrials.gov/ct2/show/record/NCT00477906> [Accessed 11 August 2020].
- 54 Clinicaltrials.gov. Evaluation of Stool Based Markers for the Early Detection of Colorectal Cancers and Adenomas. Trial ID: NCT00843375. 2009. Status: Recruiting. Available from: <https://clinicaltrials.gov/ct2/show/record/NCT00843375> [Accessed 11 August 2020].
- 55 Australian New Zealand Clinical Trials Registry (ANZCTR). Determining the effectiveness of transabdominal electrical stimulation (TES) in the treatment of female adult patients with constipation. Trial ID: ACTRN12614000736640. 2014. Status: Recruiting. Available from: <https://www.anzctr.org.au/Trial/Registration/TrialReview.aspx?id=366633&isReview=true> [Accessed 11 August 2020].
- 56 Clinicaltrials.gov. Dose-ranging Efficacy of Polydextrose Supplement on Colonic Transit Time and Symptoms in Adults With Functional Constipation. Trial ID: NCT02314936. 2014. Status: Completed. Available from: <https://clinicaltrials.gov/ct2/show/record/NCT02314936> [Accessed 11 August 2020].
- 57 Clinicaltrials.gov. Evaluating the Synergism of Soluble Dietary Fiber With Fecal Microbiota Transplantation in Slow Transit Constipation. Trial ID: NCT02291354. 2014. Status: Other. Available from: <https://clinicaltrials.gov/ct2/show/record/NCT02291354> [Accessed 11 August 2020].
- 58 Clinicaltrials.gov. Effect of Fecal Microbiota Transplantation in Slow Transit Constipation (FMTSTC). Trial ID: NCT02301221. 2014. Status: Other. Available from: <https://clinicaltrials.gov/ct2/show/record/NCT02301221> [Accessed 11 August 2020].
- 59 Clinicaltrials.gov. Phase II Study of Subcutaneous Inj. Depot of Octreotide in Patients With Acromegaly and Neuroendocrine Tumours (NETs). Trial ID: NCT02299089. 2014. Status: Completed. Available from: <https://clinicaltrials.gov/ct2/show/record/NCT02299089> [Accessed 11 August 2020].
- 60 Clinicaltrials.gov. Study to Investigate Safety- Pharmacokinetic (PK)- Pharmacodynamic (PD) and Clinical Activity of Trametinib in Subjects With Cancer or Plexiform Neurofibromas and Trametinib in Combination With

- Dabrafenib in Subjects With Cancers Harboring V600 Mutations. Trial ID: NCT02124772. 2014. Status: Recruiting. Available from: <https://clinicaltrials.gov/ct2/show/record/NCT02124772> [Accessed 11 August 2020].
- 61 Clinicaltrials.gov. A Study to Investigate the Safety and Efficacy of Fidaxomicin (Oral Suspension or Tablets) and Vancomycin (Oral Liquid or Capsules) in Pediatric Subjects With Clostridium Difficile-associated Diarrhea (CDAD) (SUNSHINE). Trial ID: NCT02218372. 2014. Status: Completed. Available from: <https://clinicaltrials.gov/ct2/show/record/NCT02218372> [Accessed 11 August 2020].
- 62 Clinicaltrials.gov. Correlation of Soluble Suppression of Tumorigenicity 2 (ST2) With Golimumab (MK-8259) Response in Participants With Ulcerative Colitis (UC) (MK-8529-022). (EVOLUTION). Trial ID: NCT02318667. 2014. Status: Completed. Available from: <https://clinicaltrials.gov/ct2/show/record/NCT02318667> [Accessed 11 August 2020].
- 63 Clinicaltrials.gov. Fecal Microbial Transplant in Pediatric Crohn's Disease (FMTCD). Trial ID: NCT02272868. 2014. Status: Completed. Available from: <https://clinicaltrials.gov/ct2/show/record/NCT02272868> [Accessed 11 August 2020].
- 64 Clinicaltrials.gov. Ipilimumab and/or Nivolumab in Combination With Temozolomide in Treating Patients With Newly Diagnosed Glioblastoma or Gliosarcoma. Trial ID: NCT02311920. 2014. Status: Active- Not Recruiting. Available from: <https://clinicaltrials.gov/ct2/show/record/NCT02311920> [Accessed 11 August 2020].
- 65 Clinicaltrials.gov. Effects of Health-social Partnership Programme. Trial ID: NCT02286375. 2014. Status: Completed. Available from: <https://clinicaltrials.gov/ct2/show/record/NCT02286375> [Accessed 11 August 2020].
- 66 Clinicaltrials.gov. Pomalidomide in Hereditary Hemorrhagic Telangiectasia and Transfusion-Dependent Vascular Ectasia: a Phase I Study. Trial ID: NCT02287558. 2014. Status: Recruiting. Available from: <https://clinicaltrials.gov/ct2/show/record/NCT02287558> [Accessed 11 August 2020].
- 67 Clinicaltrials.gov. Follow up Study to Assess Long Term Safety and Outcomes in Infants and Children Born to Mothers Participating in Retosiban Treatment Studies (ARIOS). Trial ID: NCT02292784. 2014. Status: Completed. Available from: <https://clinicaltrials.gov/ct2/show/record/NCT02292784> [Accessed 11 August 2020].
- 68 Clinicaltrials.gov. Phase 2 Nab -Paclitaxel (Abraxane) Plus Gemcitabine in Subjects With Locally Advanced Pancreatic Cancer (LAPC) (LAPACT). Trial ID: NCT02301143. 2014. Status: Completed. Available from: <https://clinicaltrials.gov/ct2/show/record/NCT02301143> [Accessed 11 August 2020].
- 69 Clinicaltrials.gov. Crizotinib in High-Risk Uveal Melanoma Following Definitive Therapy. Trial ID: NCT02223819. 2014. Status: Active- Not Recruiting. Available from: <https://clinicaltrials.gov/ct2/show/record/NCT02223819> [Accessed 11 August 2020].
- 70 Clinicaltrials.gov. Assessment of Anatomic- Physiologic and Biomechanical Characteristics of the Anal Canal and Pelvic Floor. An Observational Pilot Study. Trial ID: NCT02263170. 2014. Status: Completed. Available from: <https://clinicaltrials.gov/ct2/show/record/NCT02263170> [Accessed 11 August 2020].
- 71 EU Clinical Trials Register. SAFETY AND PHARMACOKINETICS OF ODM-204 IN PATIENTS WITH METASTATIC CASTRATION-RESISTANT PROSTATE CANCER (CRPC): OPEN- NONRANDOMISED- UNCONTROLLED- MULTICENTRE- DOSE ESCALATION- FIRST-IN-MAN STUDY WITH A DOSE EXPANSION Ensimmäisen vaiheen turvallisuus- ja imeytymistutkimus ODM-204 valmisteella kastroatiohoitoon reagoimattomilla eturauhassyöpöpotilaille: avoim-satunnaistamaton- kontrolloimaton- nousujohteiseen annoksen nostoon perustuva monikeskus- ja annoslaajennustutkimus; Dualides phase 1/2 study. Trial ID: 2014-003642-26/GB. 2014. Status: Ongoing. Available from: <https://www.clinicaltrialsregister.eu/ctr-search/trial/2014-003642-26/GB> [Accessed 11 August 2020].
- 72 ISRCTN Registry. A randomised controlled trial examining the effectiveness of a STOMA psychosocial intervention programme on the outcomes of colorectal patients with a stoma. Trial ID: ISRCTN41915584. 2014. Status: Completed. Available from: <http://www.isrctn.com/ISRCTN41915584> [Accessed 11 August 2020].
- 73 ISRCTN Registry. Partial prostate Ablation versus Radical prostatectomy. Trial ID: ISRCTN99760303. 2014. Status: Ongoing. Available from: <http://www.isrctn.com/ISRCTN99760303> [Accessed 11 August 2020].
- 74 Australian New Zealand Clinical Trials Registry (ANZCTR). The CRISP (Colorectal cancer RiSk Prediction tool) trial: providing personalised advice about bowel cancer screening in primary care.. Trial ID: ACTRN12615000155594. 2015. Status: Completed. Available from: <https://www.anzctr.org.au/Trial/Registration/TrialReview.aspx?id=367846&isReview=true> [Accessed 11 August 2020].
- 75 Australian New Zealand Clinical Trials Registry (ANZCTR). Gut Bugs Trial - Gut microbiome transfer for the treatment of adolescent obesity. Trial ID: ACTRN12615001351505. 2015. Status: Completed. Available from:



- <https://www.anzctr.org.au/Trial/Registration/TrialReview.aspx?id=369653&isReview=true> [Accessed 11 August 2020].
- 76 Australian New Zealand Clinical Trials Registry (ANZCTR). Influence of habitual dietary fibre intake on the responsiveness of the gut microbiota to a prebiotic. Trial ID: ACTRN12615000922572. 2015. Status: Completed. Available from: <https://www.anzctr.org.au/Trial/Registration/TrialReview.aspx?id=368975&isReview=true> [Accessed 11 August 2020].
- 77 Australian New Zealand Clinical Trials Registry (ANZCTR). Central brain responses of sacral nerve stimulation in patients with faecal incontinence. Trial ID: ACTRN12615001334594. 2015. Status: Active- Not Recruiting. Available from: <https://www.anzctr.org.au/Trial/Registration/TrialReview.aspx?id=368283&isReview=true> [Accessed 11 August 2020].
- 78 Clinical Research Information Service (CRIS). Relationship of food-Specific Serum IgG4 Titers to Common Food Antigens with symptom patterns in Irritable Bowel Syndrome and functional dyspepsia in South Korea. Trial ID: KCT0001774. 2015. Status: Recruiting. Available from: [https://cris.nih.go.kr/cris/en/search/search\\_result\\_st01.jsp?seq=5928](https://cris.nih.go.kr/cris/en/search/search_result_st01.jsp?seq=5928) [Accessed 11 August 2020].
- 79 Clinical Research Information Service (CRIS). Relationship of food-Specific Serum IgG4 Titers with symptom patterns in Inflammatory bowel disease in South Korea. Trial ID: KCT0001779. 2015. Status: Recruiting. Available from: [https://cris.nih.go.kr/cris/en/search/search\\_result\\_st01.jsp?seq=5530](https://cris.nih.go.kr/cris/en/search/search_result_st01.jsp?seq=5530) [Accessed 11 August 2020].
- 80 Clinical Trials Registry - India (CTRI). Effectiveness and Safety of Suns Lubiprostone capsule in treatment of Chronic Idiopathic Constipation. Trial ID: CTRI/2015/11/006358. 2015. Status: Not Available. Available from: <http://ctri.nic.in/Clinicaltrials/pmaindet2.php?trialid=4554> [Accessed 11 August 2020].
- 81 Clinical Trials Registry - India (CTRI). A clinical trial to study the feasibility and safety of Adapted Enhanced Recovery After Surgery Pathway as compared to standard care in patients undergoing simple closure of perforated duodenal ulcer. Trial ID: CTRI/2015/02/005548. 2015. Status: Not Available. Available from: <http://ctri.nic.in/Clinicaltrials/pmaindet2.php?trialid=10762> [Accessed 11 August 2020].
- 82 Clinical Trials Registry - India (CTRI). Comparative Study to assess efficacy and safety of Mycobacterium in Combination with Standard Therapy versus Standard Therapy Alone in treatment of Sepsis. Trial ID: CTRI/2015/07/005961. 2015. Status: Not Available. Available from: <http://ctri.nic.in/Clinicaltrials/pmaindet2.php?trialid=8577> [Accessed 11 August 2020].
- 83 Clinicaltrials.gov. A Safety and Efficacy Evaluation of BLI400 Laxative in Constipated Adults. Trial ID: NCT02481947. 2015. Status: Completed. Available from: <https://clinicaltrials.gov/ct2/show/record/NCT02481947> [Accessed 11 August 2020].
- 84 Clinicaltrials.gov. Study on the Impact of Education Website on the Quality of Outpatient Bowel Preparation for Colonoscopy. Trial ID: NCT02466724. 2015. Status: Completed. Available from: <https://clinicaltrials.gov/ct2/show/record/NCT02466724> [Accessed 11 August 2020].
- 85 Clinicaltrials.gov. Effectiveness of Gum Chewing on Ileus in Chinese Colorectal Patients Underwent Laparoscopic Colorectal Surgery. Trial ID: NCT02419586. 2015. Status: Completed. Available from: <https://clinicaltrials.gov/ct2/show/record/NCT02419586> [Accessed 11 August 2020].
- 86 Clinicaltrials.gov. Natural Orifice Transluminal Endoscopic Surgery for Colorectal Cancer (NOTES). Trial ID: NCT02549456. 2015. Status: Other. Available from: <https://clinicaltrials.gov/ct2/show/record/NCT02549456> [Accessed 11 August 2020].
- 87 Clinicaltrials.gov. Early Diuresis Following Colorectal Surgery. Trial ID: NCT02351934. 2015. Status: Completed. Available from: <https://clinicaltrials.gov/ct2/show/record/NCT02351934> [Accessed 11 August 2020].
- 88 Clinicaltrials.gov. Contribution of Percutaneous Endoscopic Caecostomie in the Management of Severe Constipation Refractory to Medical Treatment (ConstiCAPE). Trial ID: NCT02566746. 2015. Status: Recruiting. Available from: <https://clinicaltrials.gov/ct2/show/record/NCT02566746> [Accessed 11 August 2020].
- 89 Clinicaltrials.gov. An Evaluation of the Effectiveness of a Proprietary Probiotic Blend on Functional Constipation. Trial ID: NCT02418507. 2015. Status: Completed. Available from: <https://clinicaltrials.gov/ct2/show/record/NCT02418507> [Accessed 11 August 2020].
- 90 Clinicaltrials.gov. A Study Investigating the Effect of Digesta-Lac in Healthy Adults With Occasional Constipation. Trial ID: NCT02423564. 2015. Status: Completed. Available from: <https://clinicaltrials.gov/ct2/show/record/NCT02423564> [Accessed 11 August 2020].
- 91 Clinicaltrials.gov. Efficacy and Safety of Fecal Microbiota Transplantation for Slow Transit Constipation. Trial ID: NCT02526849. 2015. Status: Other. Available from: <https://clinicaltrials.gov/ct2/show/record/NCT02526849> [Accessed 11 August 2020].

- 92 Clinicaltrials.gov. Impact of Carbon Dioxide Insufflation and Water Exchange on Post-Colonoscopy Outcomes. Trial ID: NCT02409979. 2015. Status: Completed. Available from: <https://clinicaltrials.gov/ct2/show/record/NCT02409979> [Accessed 11 August 2020].
- 93 Clinicaltrials.gov. Nivolumab and Azacitidine With or Without Ipilimumab in Treating Patients With Refractory/Relapsed or Newly Diagnosed Acute Myeloid Leukemia. Trial ID: NCT02397720. 2015. Status: Recruiting. Available from: <https://clinicaltrials.gov/ct2/show/record/NCT02397720> [Accessed 11 August 2020].
- 94 Clinicaltrials.gov. Effects of Bronchial Segmental Endotoxin Instillation in Humans. Trial ID: NCT02392442. 2015. Status: Recruiting. Available from: <https://clinicaltrials.gov/ct2/show/record/NCT02392442> [Accessed 11 August 2020].
- 95 Clinicaltrials.gov. Long-Term Assessment of Remyelinating Therapy (RENEWED). Trial ID: NCT02657915. 2015. Status: Completed. Available from: <https://clinicaltrials.gov/ct2/show/record/NCT02657915> [Accessed 11 August 2020].
- 96 Clinicaltrials.gov. Therapeutic Use of Tadekinig Alfa in Adult-onset Still's Disease. Trial ID: NCT02398435. 2015. Status: Completed. Available from: <https://clinicaltrials.gov/ct2/show/record/NCT02398435> [Accessed 11 August 2020].
- 97 Clinicaltrials.gov. Ropidoxuridine in Treating Patients With Advanced Gastrointestinal Cancer Undergoing Radiation Therapy. Trial ID: NCT02381561. 2015. Status: Active- Not Recruiting. Available from: <https://clinicaltrials.gov/ct2/show/record/NCT02381561> [Accessed 11 August 2020].
- 98 Clinicaltrials.gov. A Study of PLX8394 as a Single Agent in Patients With Advanced Unresectable Solid Tumors. Trial ID: NCT02428712. 2015. Status: Active- Not Recruiting. Available from: <https://clinicaltrials.gov/ct2/show/record/NCT02428712> [Accessed 11 August 2020].
- 99 Clinicaltrials.gov. Continued Versus Discontinued Oxytocin Stimulation of Labour (CONDISOX). Trial ID: NCT02553226. 2015. Status: Recruiting. Available from: <https://clinicaltrials.gov/ct2/show/record/NCT02553226> [Accessed 11 August 2020].
- 100 Clinicaltrials.gov. Molecular Imaging of Primary Amyloid Cardiomyopathy (MICA). Trial ID: NCT02641145. 2015. Status: Recruiting. Available from: <https://clinicaltrials.gov/ct2/show/record/NCT02641145> [Accessed 11 August 2020].
- 101 Clinicaltrials.gov. Aspiration Treatment of Perianal Abscess. Trial ID: NCT02585141. 2015. Status: Active- Not Recruiting. Available from: <https://clinicaltrials.gov/ct2/show/record/NCT02585141> [Accessed 11 August 2020].
- 102 Clinicaltrials.gov. Endoscopic Treatment of Complex Anal Fistulas (VAAFT). Trial ID: NCT02585167. 2015. Status: Recruiting. Available from: <https://clinicaltrials.gov/ct2/show/record/NCT02585167> [Accessed 11 August 2020].
- 103 Clinicaltrials.gov. A Prospective Evaluation of the Strattice-LIFT to Treat Anal Fistula. Trial ID: NCT02423330. 2015. Status: Other. Available from: <https://clinicaltrials.gov/ct2/show/record/NCT02423330> [Accessed 11 August 2020].
- 104 Clinicaltrials.gov. Long-term Assessment of Safety and Efficacy of BI 695501 in Patients With Rheumatoid Arthritis. Trial ID: NCT02640612. 2015. Status: Completed. Available from: <https://clinicaltrials.gov/ct2/show/record/NCT02640612> [Accessed 11 August 2020].
- 105 Clinicaltrials.gov. 12-Week Study Evaluating the Efficacy- Safety- and Tolerability of Adjunctive Infliximab for Bipolar I/II Depression. Trial ID: NCT02363738. 2015. Status: Other. Available from: <https://clinicaltrials.gov/ct2/show/record/NCT02363738> [Accessed 11 August 2020].
- 106 Clinicaltrials.gov. Comparing Rectus Sheath Catheter to Epidural Post Cystectomy. Trial ID: NCT02572804. 2015. Status: Other. Available from: <https://clinicaltrials.gov/ct2/show/record/NCT02572804> [Accessed 11 August 2020].
- 107 Clinicaltrials.gov. Ibrutinib as an Immune Modulating Agent for Patients With Asymptomatic- High-risk CLL/SLL Risk Chronic Lymphocytic Leukemia or Small Lymphocytic Lymphoma. Trial ID: NCT02518555. 2015. Status: Active- Not Recruiting. Available from: <https://clinicaltrials.gov/ct2/show/record/NCT02518555> [Accessed 11 August 2020].
- 108 Clinicaltrials.gov. Efficacy of 30-day Duration of Fidaxomicin for Recurrent C. Difficile Infection. Trial ID: NCT02395848. 2015. Status: Recruiting. Available from: <https://clinicaltrials.gov/ct2/show/record/NCT02395848> [Accessed 11 August 2020].
- 109 Clinicaltrials.gov. A Prospective Trial of Lyophilized Fecal Microbiota Transplantation for Recurrent Clostridium Difficile Infection. Trial ID: NCT02592343. 2015. Status: Active- Not Recruiting. Available from: <https://clinicaltrials.gov/ct2/show/record/NCT02592343> [Accessed 11 August 2020].



- 110 Clinicaltrials.gov. An Open Label Phase 4 Study to Evaluate Efficacy of Early Versus Late Use of Vedolizumab in Ulcerative Colitis (LOVE-UC). Trial ID: NCT02646657. 2015. Status: Recruiting. Available from: <https://clinicaltrials.gov/ct2/show/record/NCT02646657> [Accessed 11 August 2020].
- 111 Clinicaltrials.gov. Therapeutic Management of Complex Anal Fistulas by Installing a Closure Clip: Multicentre Randomized Controlled Trial (FISCLOSE). Trial ID: NCT02336867. 2015. Status: Other. Available from: <https://clinicaltrials.gov/ct2/show/record/NCT02336867> [Accessed 11 August 2020].
- 112 Clinicaltrials.gov. The Effect of Riboflavin in Crohn's Disease (RISE-UP). Trial ID: NCT02538354. 2015. Status: Other. Available from: <https://clinicaltrials.gov/ct2/show/record/NCT02538354> [Accessed 11 August 2020].
- 113 Clinicaltrials.gov. Acupuncture Treatment for Active Crohn's Disease. Trial ID: NCT02559037. 2015. Status: Completed. Available from: <https://clinicaltrials.gov/ct2/show/record/NCT02559037> [Accessed 11 August 2020].
- 114 Clinicaltrials.gov. Does Clinical Response Correlate With Serum Certolizumab Levels? (APOLLO). Trial ID: NCT02597829. 2015. Status: Other. Available from: <https://clinicaltrials.gov/ct2/show/record/NCT02597829> [Accessed 11 August 2020].
- 115 Clinicaltrials.gov. Study Comparing Rifaximin With Xifaxan 200 mg in Traveler's Diarrhea. Trial ID: NCT02498418. 2015. Status: Completed. Available from: <https://clinicaltrials.gov/ct2/show/record/NCT02498418> [Accessed 11 August 2020].
- 116 Clinicaltrials.gov. Characterization of Resistance Against Live-attenuated Diarrhoeagenic E. Coli (CORAL). Trial ID: NCT02541695. 2015. Status: Completed. Available from: <https://clinicaltrials.gov/ct2/show/record/NCT02541695> [Accessed 11 August 2020].
- 117 Clinicaltrials.gov. Special Drug Use Surveillance of Irribow in Female Patients. Trial ID: NCT02612649. 2015. Status: Completed. Available from: <https://clinicaltrials.gov/ct2/show/record/NCT02612649> [Accessed 11 August 2020].
- 118 Clinicaltrials.gov. Dose Finding Study in Colorectal Cancer Patients Receiving 5-FU-based Chemotherapy to Assess the Efficacy of Elsiglutide in the Prevention of Chemotherapy Induced Diarrhea (CID). Trial ID: NCT02383810. 2015. Status: Completed. Available from: <https://clinicaltrials.gov/ct2/show/record/NCT02383810> [Accessed 11 August 2020].
- 119 Clinicaltrials.gov. Prospective Evaluation of Perineal Ultrasound in Thr Delivery Room to Improve the Diagnosis of OASIS. Trial ID: NCT02615236. 2015. Status: Active- Not Recruiting. Available from: <https://clinicaltrials.gov/ct2/show/record/NCT02615236> [Accessed 11 August 2020].
- 120 Clinicaltrials.gov. Whole-Brain Radiation Therapy With or Without Hippocampal Avoidance in Treating Patients With Limited Stage or Extensive Stage Small Cell Lung Cancer. Trial ID: NCT02635009. 2015. Status: Recruiting. Available from: <https://clinicaltrials.gov/ct2/show/record/NCT02635009> [Accessed 11 August 2020].
- 121 Clinicaltrials.gov. Validation of Two Measures for Growth Hormone Deficiency in Children- the Treatment Related Impact Measure of Childhood Growth Hormone Deficiency (TRIM-CGHD) and the Treatment Burden Measure of Childhood Growth Hormone Deficiency (TB-CGHD). Trial ID: NCT02580032. 2015. Status: Completed. Available from: <https://clinicaltrials.gov/ct2/show/record/NCT02580032> [Accessed 11 August 2020].
- 122 Clinicaltrials.gov. Prospective Randomized Trial About THD Versus Ligasure Hemorrhoidectomy for Grade III and IV Hemorrhoids (THD-LIGA). Trial ID: NCT02654249. 2015. Status: Other. Available from: <https://clinicaltrials.gov/ct2/show/record/NCT02654249> [Accessed 11 August 2020].
- 123 Clinicaltrials.gov. Essentiale Paste in Patients With Gastrointestinal Symptoms in Acute or Chronic Liver Diseases (EPLID). Trial ID: NCT02517385. 2015. Status: Completed. Available from: <https://clinicaltrials.gov/ct2/show/record/NCT02517385> [Accessed 11 August 2020].
- 124 Clinicaltrials.gov. A Study to Assess the Safety of Hep C Vaccine Candidates in HIV Seropositive Individuals. Trial ID: NCT02568332. 2015. Status: Completed. Available from: <https://clinicaltrials.gov/ct2/show/record/NCT02568332> [Accessed 11 August 2020].
- 125 Clinicaltrials.gov. A Study to Evaluate Pharmacokinetic (PK) and Safety of GSK1265744 in Subjects With Hepatic Impairment and Control Healthy Volunteers. Trial ID: NCT02354950. 2015. Status: Completed. Available from: <https://clinicaltrials.gov/ct2/show/record/NCT02354950> [Accessed 11 August 2020].
- 126 Clinicaltrials.gov. Fabulous Fibre Study - Effect of Wheat Bran Extract on Gut and General Health in Healthy Aging Subjects (FFS) (FFS). Trial ID: NCT02693782. 2015. Status: Completed. Available from: <https://clinicaltrials.gov/ct2/show/record/NCT02693782> [Accessed 11 August 2020].
- 127 Clinicaltrials.gov. Efficacy of a Telmisartan/S-Amlodipine on 24-hour BP Control in Hypertensive Patients Inadequately Controlled. Trial ID: NCT02526875. 2015. Status: Other. Available from: <https://clinicaltrials.gov/ct2/show/record/NCT02526875> [Accessed 11 August 2020].

- 128 Clinicaltrials.gov. Biomarkers in Inflammatory Bowel Diseases. Trial ID: NCT02612103. 2015. Status: Completed. Available from: <https://clinicaltrials.gov/ct2/show/record/NCT02612103> [Accessed 11 August 2020].
- 129 Clinicaltrials.gov. A Trial to Determine the Effects of Exercise in Inflammatory Bowel Disease and Rheumatoid Arthritis (ExMET-IBD). Trial ID: NCT02463916. 2015. Status: Other. Available from: <https://clinicaltrials.gov/ct2/show/record/NCT02463916> [Accessed 11 August 2020].
- 130 Clinicaltrials.gov. Moxibustion for Diarrhea-predominant Irritable Bowel Syndrome. Trial ID: NCT02421627. 2015. Status: Completed. Available from: <https://clinicaltrials.gov/ct2/show/record/NCT02421627> [Accessed 11 August 2020].
- 131 Clinicaltrials.gov. Faecal Microbiota Transplantation in Irritable Bowel Syndrome. Trial ID: NCT02423421. 2015. Status: Other. Available from: <https://clinicaltrials.gov/ct2/show/record/NCT02423421> [Accessed 11 August 2020].
- 132 Clinicaltrials.gov. Clinical Trials of N-acetyl Glucosamine Capsule for IBS-D Treatment. Trial ID: NCT02504060. 2015. Status: Other. Available from: <https://clinicaltrials.gov/ct2/show/record/NCT02504060> [Accessed 11 August 2020].
- 133 Clinicaltrials.gov. Colonoscopy-related Pain Predicts the Treatment Response of Amitriptyline in Patients With Irritable Bowel Syndrome. Trial ID: NCT02638870. 2015. Status: Other. Available from: <https://clinicaltrials.gov/ct2/show/record/NCT02638870> [Accessed 11 August 2020].
- 134 Clinicaltrials.gov. Effects of Wheat Breads on Symptoms of IBS- a Pilot Study (Wheat-IBS). Trial ID: NCT02572908. 2015. Status: Completed. Available from: <https://clinicaltrials.gov/ct2/show/record/NCT02572908> [Accessed 11 August 2020].
- 135 Clinicaltrials.gov. The Efficacy of PX0612 In The Treatment Of Irritable Bowel Syndrome. Trial ID: NCT02431533. 2015. Status: Completed. Available from: <https://clinicaltrials.gov/ct2/show/record/NCT02431533> [Accessed 11 August 2020].
- 136 Clinicaltrials.gov. Methoxyamine Hydrochloride- Pemetrexed Disodium- Cisplatin- and Radiation Therapy in Treating Patients With Stage IIIA-IV Non-small Cell Lung Cancer. Trial ID: NCT02535325. 2015. Status: Active- Not Recruiting. Available from: <https://clinicaltrials.gov/ct2/show/record/NCT02535325> [Accessed 11 August 2020].
- 137 Clinicaltrials.gov. Battlefield Acupuncture for the Treatment of Low Back Pain in the Emergency Department. Trial ID: NCT02399969. 2015. Status: Completed. Available from: <https://clinicaltrials.gov/ct2/show/record/NCT02399969> [Accessed 11 August 2020].
- 138 Clinicaltrials.gov. Human Plasma Fatty Acid Oscillations. Trial ID: NCT02502435. 2015. Status: Recruiting. Available from: <https://clinicaltrials.gov/ct2/show/record/NCT02502435> [Accessed 11 August 2020].
- 139 Clinicaltrials.gov. Children s Growth and Behavior Study. Trial ID: NCT02390765. 2015. Status: Recruiting. Available from: <https://clinicaltrials.gov/ct2/show/record/NCT02390765> [Accessed 11 August 2020].
- 140 Clinicaltrials.gov. Osteoarthritis of the Knee- Inflammation- and the Effect of Adalimumab (OKINADA) (OKINADA). Trial ID: NCT02471118. 2015. Status: Recruiting. Available from: <https://clinicaltrials.gov/ct2/show/record/NCT02471118> [Accessed 11 August 2020].
- 141 Clinicaltrials.gov. The Association Between Ovarian Endometrioma and Lower Urinary Tract Symptoms. Trial ID: NCT02623244. 2015. Status: Recruiting. Available from: <https://clinicaltrials.gov/ct2/show/record/NCT02623244> [Accessed 11 August 2020].
- 142 Clinicaltrials.gov. EndoBarrier TM Gastrointestinal Liner Diabetes Trial (EndoBarrier). Trial ID: NCT02459561. 2015. Status: Active- Not Recruiting. Available from: <https://clinicaltrials.gov/ct2/show/record/NCT02459561> [Accessed 11 August 2020].
- 143 Clinicaltrials.gov. Fentanyl Patch Pharmacokinetics in Healthy Adults. Trial ID: NCT02531971. 2015. Status: Completed. Available from: <https://clinicaltrials.gov/ct2/show/record/NCT02531971> [Accessed 11 August 2020].
- 144 Clinicaltrials.gov. Chronic Pelvic Pain in Women - Conservative Group Treatment Compared to Standard Conservative Treatment. (CPP). Trial ID: NCT02356796. 2015. Status: Completed. Available from: <https://clinicaltrials.gov/ct2/show/record/NCT02356796> [Accessed 11 August 2020].
- 145 Clinicaltrials.gov. Prevalence of Small Bowel Polyps in Patients With Sporadic Duodenal Adenomas (SPIDA). Trial ID: NCT02470416. 2015. Status: Active- Not Recruiting. Available from: <https://clinicaltrials.gov/ct2/show/record/NCT02470416> [Accessed 11 August 2020].
- 146 Clinicaltrials.gov. A Study Evaluating the Overall Pain Relief and Safety of Intravenous (IV) CR845 in Patients Undergoing Abdominal Surgery. Trial ID: NCT02542384. 2015. Status: Completed. Available from: <https://clinicaltrials.gov/ct2/show/record/NCT02542384> [Accessed 11 August 2020].

- 147 Clinicaltrials.gov. Bump on the Ball: Impact of a Prenatal Exercise & Education Program on Birth Outcomes & Maternal Quality of Life. Trial ID: NCT02334397. 2015. Status: Completed. Available from: <https://clinicaltrials.gov/ct2/show/record/NCT02334397> [Accessed 11 August 2020].
- 148 Clinicaltrials.gov. Obstetric Perineal Trauma and Physiotherapy. Trial ID: NCT02682212. 2015. Status: Completed. Available from: <https://clinicaltrials.gov/ct2/show/record/NCT02682212> [Accessed 11 August 2020].
- 149 Clinicaltrials.gov. Dose Escalation Study of Preoperative SBRT for High Risk Prostate Cancer. Trial ID: NCT02572284. 2015. Status: Active- Not Recruiting. Available from: <https://clinicaltrials.gov/ct2/show/record/NCT02572284> [Accessed 11 August 2020].
- 150 Clinicaltrials.gov. HDR Brachytherapy vs. LDR Brachytherapy Monotherapy in Localized Prostate Cancer (HDRvsLDR). Trial ID: NCT02628041. 2015. Status: Active- Not Recruiting. Available from: <https://clinicaltrials.gov/ct2/show/record/NCT02628041> [Accessed 11 August 2020].
- 151 Clinicaltrials.gov. Transplantoux Health Evaluation Study (THES). Trial ID: NCT02533245. 2015. Status: Other. Available from: <https://clinicaltrials.gov/ct2/show/record/NCT02533245> [Accessed 11 August 2020].
- 152 Clinicaltrials.gov. A Phase 1 Study of the EZH2 Inhibitor Tazemetostat in Pediatric Subjects With Relapsed or Refractory IN11-Negative Tumors or Synovial Sarcoma. Trial ID: NCT02601937. 2015. Status: Recruiting. Available from: <https://clinicaltrials.gov/ct2/show/record/NCT02601937> [Accessed 11 August 2020].
- 153 Clinicaltrials.gov. NeuroRegen Scaffold With Stem Cells for Chronic Spinal Cord Injury Repair. Trial ID: NCT02352077. 2015. Status: Invitation. Available from: <https://clinicaltrials.gov/ct2/show/record/NCT02352077> [Accessed 11 August 2020].
- 154 Clinicaltrials.gov. Spinal Cord Injury Epidural Stimulation. Trial ID: NCT02592668. 2015. Status: Active- Not Recruiting. Available from: <https://clinicaltrials.gov/ct2/show/record/NCT02592668> [Accessed 11 August 2020].
- 155 Clinicaltrials.gov. Post-Approval 'Real Conditions of Use' Study (PAS003). Trial ID: NCT02555280. 2015. Status: Recruiting. Available from: <https://clinicaltrials.gov/ct2/show/record/NCT02555280> [Accessed 11 August 2020].
- 156 Clinicaltrials.gov. Cognitive Impact of Pomegranate Polyphenols Following Ischemic Stroke. Trial ID: NCT02442804. 2015. Status: Completed. Available from: <https://clinicaltrials.gov/ct2/show/record/NCT02442804> [Accessed 11 August 2020].
- 157 Clinicaltrials.gov. The Bowel CLEAnsing: A National Initiative (B-CLEAN). Trial ID: NCT02547571. 2015. Status: Completed. Available from: <https://clinicaltrials.gov/ct2/show/record/NCT02547571> [Accessed 11 August 2020].
- 158 Clinicaltrials.gov. A Study of AZD2014 in Combination With Selumetinib in Patients With Advanced Cancers (TORCMEK). Trial ID: NCT02583542. 2015. Status: Active- Not Recruiting. Available from: <https://clinicaltrials.gov/ct2/show/record/NCT02583542> [Accessed 11 August 2020].
- 159 Clinicaltrials.gov. Pre-Marketing Feasibility Evaluation of the UriCap-RM - Urine Collection in Hospitalized Male Patients. Trial ID: NCT02529371. 2015. Status: Other. Available from: <https://clinicaltrials.gov/ct2/show/record/NCT02529371> [Accessed 11 August 2020].
- 160 Clinicaltrials.gov. Feasibility of the UriCap-F for Urine Collection in Hospitalized Women. Trial ID: NCT02530372. 2015. Status: Other. Available from: <https://clinicaltrials.gov/ct2/show/record/NCT02530372> [Accessed 11 August 2020].
- 161 Clinicaltrials.gov. Diagnosing Bacterial Vaginosis/Vaginitis (BV) Using the Gynecologene Test Method (SAGE). Trial ID: NCT02558179. 2015. Status: Other. Available from: <https://clinicaltrials.gov/ct2/show/record/NCT02558179> [Accessed 11 August 2020].
- 162 Clinicaltrials.gov. Apical Suspension Repair for Vault Prolapse In a Three-Arm Randomized Trial Design (ASPIRe). Trial ID: NCT02676973. 2015. Status: Active- Not Recruiting. Available from: <https://clinicaltrials.gov/ct2/show/record/NCT02676973> [Accessed 11 August 2020].
- 163 Clinicaltrials.gov. Diet and Stool Metabolites in Fecal Incontinence. Trial ID: NCT02485522. 2015. Status: Completed. Available from: <https://clinicaltrials.gov/ct2/show/record/NCT02485522> [Accessed 11 August 2020].
- 164 EU Clinical Trials Register. Multicentre- Randomised- Placebo-Controlled Trial of Mebeverine in Children with Irritable Bowel Syndrome (IBS) or Functional Abdominal Pain - not otherwise specified (FAP-NOS); Duski. Trial ID: 2015-003293-32/NL. 2015. Status: Ongoing. Available from: <https://www.clinicaltrialsregister.eu/ctr-search/trial/2015-003293-32/NL> [Accessed 11 August 2020].
- 165 EU Clinical Trials Register. Intravenous iron- early functional recovery and delirium in patients atients with hip fracture Hierro intravenoso- recuperaci n funcional precoz y delirium en pacientes con fractura de cadera. Trial ID: 2014-001923-53/ES. 2015. Status: Ongoing. Available from: <https://www.clinicaltrialsregister.eu/ctr-search/trial/2014-001923-53/ES> [Accessed 11 August 2020].

- 166 EU Clinical Trials Register. A Multicenter- Open-Label Study of Sebelipase Alfa in Patients with Lysosomal Acid Lipase Deficiency. Trial ID: 2011-004287-30/NL. 2015. Status: Completed. Available from: <https://www.clinicaltrialsregister.eu/ctr-search/trial/2011-004287-30/NL> [Accessed 11 August 2020].
- 167 EU Clinical Trials Register. CONDISOX: Continued versus discontinued oxytocin stimulation of labour in a double-blind randomised controlled trial. Trial ID: 2015-002942-30/DK. 2015. Status: Ongoing. Available from: <https://www.clinicaltrialsregister.eu/ctr-search/trial/2015-002942-30/DK> [Accessed 11 August 2020].
- 168 EU Clinical Trials Register. Sandostatin (Octreotide LAR) may lead to clinical improvement through receptor occupation optimisation. A prospective interventional trial of patients with neuro-endocrine tumors with carcinoid syndrome receiving octreotide LAR.; SCIROCCO. Trial ID: 2014-003856-30/BE. 2015. Status: Completed. Available from: <https://www.clinicaltrialsregister.eu/ctr-search/trial/2014-003856-30/BE> [Accessed 11 August 2020].
- 169 EU Clinical Trials Register. A Randomised Active-Controlled Double-Blind and Open Label Extension Study to Evaluate the Efficacy- Long-term Safety and Tolerability of TP05 3.2 g/day for the Treatment of Active Ulcerative Colitis (UC). Trial ID: 2013-000366-11/RO. 2015. Status: Ongoing. Available from: <https://www.clinicaltrialsregister.eu/ctr-search/trial/2013-000366-11/RO> [Accessed 11 August 2020].
- 170 ISRCTN Registry. Primary care based text-reminders in colorectal cancer screening. Trial ID: ISRCTN70904476. 2015. Status: Completed. Available from: <http://www.isrctn.com/ISRCTN70904476> [Accessed 11 August 2020].
- 171 ISRCTN Registry. Effect of a probiotic blend on bloating and colonic transit time in participants with self-reported bloating and constipation. Trial ID: ISRCTN41607808. 2015. Status: Completed. Available from: <http://www.isrctn.com/ISRCTN41607808> [Accessed 11 August 2020].
- 172 ISRCTN Registry. Investigation of continence- sexual- and bowel function after radical surgery for bladder cancer. Trial ID: ISRCTN42949068. 2015. Status: Recruiting. Available from: <http://www.isrctn.com/ISRCTN42949068> [Accessed 11 August 2020].
- 173 ISRCTN Registry. CapaCITY study 1-chronic constipation treatment pathway. Trial ID: ISRCTN11791740. 2015. Status: Ongoing. Available from: <http://www.isrctn.com/ISRCTN11791740> [Accessed 11 August 2020].
- 174 ISRCTN Registry. Dietary interventions in irritable bowel syndrome. Trial ID: ISRCTN16562415. 2015. Status: Completed. Available from: <http://www.isrctn.com/ISRCTN16562415> [Accessed 11 August 2020].
- 175 ISRCTN Registry. Are gut hormone changes the reason why the long-limb gastric bypass is more effective than the standard limb gastric bypass in improving type 2 diabetes mellitus? Trial ID: ISRCTN15283219. 2015. Status: Completed. Available from: <http://www.isrctn.com/ISRCTN15283219> [Accessed 11 August 2020].
- 176 ISRCTN Registry. Feasibility of a guided workbook intervention for cancer patients. Trial ID: ISRCTN56342476. 2015. Status: Completed. Available from: <http://www.isrctn.com/ISRCTN56342476> [Accessed 11 August 2020].
- 177 Thai Clinical Trials Registry (TCTR). The benefit of an anal purse-string suture to decrease contamination during vaginal surgery: a prospective- randomized controlled trial. Trial ID: TCTR20151211001. 2015. Status: Invitation. Available from: <http://www.clinicaltrials.in.th/index.php?tp=regtrials&menu=trialssearch&smenu=fulltext&task=search&task2=view1&id=1650> [Accessed 11 August 2020].
- 178 UMIN Clinical Trials Registry (UMIN-CTR). Preventive effect of the Lactobacillus brevis KB290 and beta-carotene to IBS-D-like symptoms. Trial ID: UMIN000018002. 2015. Status: Completed. Available from: [https://upload.umin.ac.jp/cgi-open-bin/ctr\\_e/ctr\\_view.cgi?recptno=R000020752](https://upload.umin.ac.jp/cgi-open-bin/ctr_e/ctr_view.cgi?recptno=R000020752) [Accessed 11 August 2020].
- 179 UMIN Clinical Trials Registry (UMIN-CTR). Study to evaluate the effectiveness of health advice to prevent preterm birth and improve quality of life. Trial ID: UMIN000016853. 2015. Status: Active- Not Recruiting. Available from: [https://upload.umin.ac.jp/cgi-open-bin/ctr\\_e/ctr\\_view.cgi?recptno=R000018211](https://upload.umin.ac.jp/cgi-open-bin/ctr_e/ctr_view.cgi?recptno=R000018211) [Accessed 11 August 2020].
- 180 Australian New Zealand Clinical Trials Registry (ANZCTR). Improving uptake of colorectal cancer screening among primary care attendees. Trial ID: ACTRN12616001299493. 2016. Status: Completed. Available from: <https://www.anzctr.org.au/Trial/Registration/TrialReview.aspx?id=371136&isReview=true> [Accessed 11 August 2020].
- 181 Australian New Zealand Clinical Trials Registry (ANZCTR). The CRISP trial: a risk assessment tool to inform bowel cancer screening in general practice patients. Trial ID: ACTRN12616001573448. 2016. Status: Active- Not Recruiting. Available from: <https://www.anzctr.org.au/Trial/Registration/TrialReview.aspx?id=371743&isReview=true> [Accessed 11 August 2020].
- 182 Australian New Zealand Clinical Trials Registry (ANZCTR). The IMPACT of preoperative immunonutrition in patients undergoing surgery for colorectal cancer. Trial ID: ACTRN12616001621404p. 2016. Status: Not Yet

- Recruiting. Available from:  
<https://www.anzctr.org.au/Trial/Registration/TrialReview.aspx?id=371874&isReview=true> [Accessed 11 August 2020].
- 183 Australian New Zealand Clinical Trials Registry (ANZCTR). Randomised controlled trial comparing cutting seton vs ligation of intersphincteric fistula tract (LIFT) for complex anal fistula. Trial ID: ACTRN12616001258448. 2016. Status: Recruiting. Available from:  
<https://www.anzctr.org.au/Trial/Registration/TrialReview.aspx?id=368792&isReview=true> [Accessed 11 August 2020].
- 184 Australian New Zealand Clinical Trials Registry (ANZCTR). The Act-F Trial: Does active follow-up of invitation lead to higher participation in bowel screening by Maori- Pacific and Asians? Trial ID: ACTRN12616001487404. 2016. Status: Completed. Available from:  
<https://www.anzctr.org.au/Trial/Registration/TrialReview.aspx?id=371688&isReview=true> [Accessed 11 August 2020].
- 185 Australian New Zealand Clinical Trials Registry (ANZCTR). Thioguanine Suppositories For Proctitis. Trial ID: ACTRN12616000602426. 2016. Status: Not Yet Recruiting. Available from:  
<https://www.anzctr.org.au/Trial/Registration/TrialReview.aspx?id=370532&isReview=true> [Accessed 11 August 2020].
- 186 Australian New Zealand Clinical Trials Registry (ANZCTR). Comparison of the mini sling or retropubic sling in the treatment of women with severe (Intrinsic Sphincter Deficiency -ISD) stress urinary incontinence (SUI). Trial ID: ACTRN12616000328471. 2016. Status: Recruiting. Available from:  
<https://www.anzctr.org.au/Trial/Registration/TrialReview.aspx?id=370229&isReview=true> [Accessed 11 August 2020].
- 187 Australian New Zealand Clinical Trials Registry (ANZCTR). Pelvic floor assessment in post-partum women. Trial ID: ACTRN12616000290493. 2016. Status: Completed. Available from:  
<https://www.anzctr.org.au/Trial/Registration/TrialReview.aspx?id=370212&isReview=true> [Accessed 11 August 2020].
- 188 Clinical Research Information Service (CRIS). The effects of bowel preparation education by using an informative Short Message Service. Trial ID: KCT0002184. 2016. Status: Recruiting. Available from:  
[https://cris.nih.go.kr/cris/en/search/search\\_result\\_st01.jsp?seq=6906](https://cris.nih.go.kr/cris/en/search/search_result_st01.jsp?seq=6906) [Accessed 11 August 2020].
- 189 Clinicaltrials.gov. Use of Gastrografin in the Management of Fecal Impaction in Patients With Severe Chronic Constipation. Trial ID: NCT02784093. 2016. Status: Other. Available from:  
<https://clinicaltrials.gov/ct2/show/record/NCT02784093> [Accessed 11 August 2020].
- 190 Clinicaltrials.gov. A Safety and Efficacy Study of a Bowel Cleansing Preparation (BLI800) in Pediatric Subjects Undergoing Colonoscopy. Trial ID: NCT02819323. 2016. Status: Completed. Available from:  
<https://clinicaltrials.gov/ct2/show/record/NCT02819323> [Accessed 11 August 2020].
- 191 Clinicaltrials.gov. A Novel Robotic System for Single Port and Natural Orifice Transluminal Endoscopic Surgery. Trial ID: NCT03010813. 2016. Status: Completed. Available from:  
<https://clinicaltrials.gov/ct2/show/record/NCT03010813> [Accessed 11 August 2020].
- 192 Clinicaltrials.gov. Impact of Tunneling During Minimally Invasive Sacrocolpopexy. Trial ID: NCT02856217. 2016. Status: Completed. Available from: <https://clinicaltrials.gov/ct2/show/record/NCT02856217> [Accessed 11 August 2020].
- 193 Clinicaltrials.gov. Rectal Sparing Approach After Preoperative Radio and/or Chemotherapy in Patients With Rectal Cancer (ReSARCh). Trial ID: NCT02710812. 2016. Status: Recruiting. Available from:  
<https://clinicaltrials.gov/ct2/show/record/NCT02710812> [Accessed 11 August 2020].
- 194 Clinicaltrials.gov. Freeze-dried vs Fresh Fecal Microbiota Transplantation in Patients With Slow Transit Constipation. Trial ID: NCT02676388. 2016. Status: Other. Available from:  
<https://clinicaltrials.gov/ct2/show/record/NCT02676388> [Accessed 11 August 2020].
- 195 Clinicaltrials.gov. Using 16S rRNA Gene Sequencing Analysis Intestinal Microbiota in Constipation Patients. Trial ID: NCT02984969. 2016. Status: Other. Available from: <https://clinicaltrials.gov/ct2/show/record/NCT02984969> [Accessed 11 August 2020].
- 196 Clinicaltrials.gov. Efficacy and Safety in a Randomised Acute Pain Study of MR308 (Tramadol/Celecoxib). (STARDOM1). Trial ID: NCT02982161. 2016. Status: Completed. Available from:  
<https://clinicaltrials.gov/ct2/show/record/NCT02982161> [Accessed 11 August 2020].



- 197 Clinicaltrials.gov. Effect of Pioglitazone Administered to Patients With Adrenomyeloneuropathy (XAMNPIOP2011). Trial ID: NCT03864523. 2016. Status: Completed. Available from: <https://clinicaltrials.gov/ct2/show/record/NCT03864523> [Accessed 11 August 2020].
- 198 Clinicaltrials.gov. First-in-human Study of Oral TP-0903 (a Novel Inhibitor of AXL Kinase) in Patients With Advanced Solid Tumors. Trial ID: NCT02729298. 2016. Status: Recruiting. Available from: <https://clinicaltrials.gov/ct2/show/record/NCT02729298> [Accessed 11 August 2020].
- 199 Clinicaltrials.gov. Memantine and Comprehensive- Individualized- Patient Centered Management of Alzheimer's Disease: Health Outcome. Trial ID: NCT02854917. 2016. Status: Completed. Available from: <https://clinicaltrials.gov/ct2/show/record/NCT02854917> [Accessed 11 August 2020].
- 200 Clinicaltrials.gov. Integrating Behavioral Health and Primary Care for Comorbid Behavioral and Medical Problems (IBHPC). Trial ID: NCT02868983. 2016. Status: Invitation. Available from: <https://clinicaltrials.gov/ct2/show/record/NCT02868983> [Accessed 11 August 2020].
- 201 Clinicaltrials.gov. Effects of a Orally Inhaled Fluticasone Furoate on Growth Velocity in Prepubertal- Paediatric Subjects With Asthma Over a Year. Trial ID: NCT02889809. 2016. Status: Active- Not Recruiting. Available from: <https://clinicaltrials.gov/ct2/show/record/NCT02889809> [Accessed 11 August 2020].
- 202 Clinicaltrials.gov. Fesoterodine for Amelioration of Autonomic Dysreflexia (AD) Following Spinal Cord Injury (SCI). Trial ID: NCT02676154. 2016. Status: Completed. Available from: <https://clinicaltrials.gov/ct2/show/record/NCT02676154> [Accessed 11 August 2020].
- 203 Clinicaltrials.gov. Change in Reward System Activation and Gut Microbiota Following RYGB and Sleeve Gastrectomy for Weight Loss vs. Control-Heads Up Ancillary. Trial ID: NCT02735564. 2016. Status: Completed. Available from: <https://clinicaltrials.gov/ct2/show/record/NCT02735564> [Accessed 11 August 2020].
- 204 Clinicaltrials.gov. A Trial Assessing Post-Operative Use of ProSpare- a Rectal Obturator in Prostate Cancer Radiotherapy (POPS). Trial ID: NCT02978014. 2016. Status: Recruiting. Available from: <https://clinicaltrials.gov/ct2/show/record/NCT02978014> [Accessed 11 August 2020].
- 205 Clinicaltrials.gov. Epidural Analgesia Use in Pancreatic Resections (E-PRO I). Trial ID: NCT02681796. 2016. Status: Completed. Available from: <https://clinicaltrials.gov/ct2/show/record/NCT02681796> [Accessed 11 August 2020].
- 206 Clinicaltrials.gov. Patient Safety Learning Laboratory: Making Acute Care More Patient-Centered (PSLL). Trial ID: NCT02969343. 2016. Status: Completed. Available from: <https://clinicaltrials.gov/ct2/show/record/NCT02969343> [Accessed 11 August 2020].
- 207 Clinicaltrials.gov. A Controlled Clinical Study of Dupilumab in Patients With Bilateral Nasal Polyps (SINUS-24). Trial ID: NCT02912468. 2016. Status: Completed. Available from: <https://clinicaltrials.gov/ct2/show/record/NCT02912468> [Accessed 11 August 2020].
- 208 Clinicaltrials.gov. Microbiota or Placebo After Antimicrobial Therapy for Recurrent C. Difficile at Home (MATCH) (MATCH). Trial ID: NCT03005379. 2016. Status: Recruiting. Available from: <https://clinicaltrials.gov/ct2/show/record/NCT03005379> [Accessed 11 August 2020].
- 209 Clinicaltrials.gov. Effect of Naloxegol on Gastric- Small Bowel- and Colonic Transit in Healthy Subjects. Trial ID: NCT02737059. 2016. Status: Completed. Available from: <https://clinicaltrials.gov/ct2/show/record/NCT02737059> [Accessed 11 August 2020].
- 210 Clinicaltrials.gov. Reclassifying Constipation Using Imaging and Manometry (RECLAIM). Trial ID: NCT03226145. 2016. Status: Recruiting. Available from: <https://clinicaltrials.gov/ct2/show/record/NCT03226145> [Accessed 11 August 2020].
- 211 Clinicaltrials.gov. COmparison of MicroBiota AccordIng to Age in Crohn's Disease (COMeBACK) (COMeBACK). Trial ID: NCT02839317. 2016. Status: Recruiting. Available from: <https://clinicaltrials.gov/ct2/show/record/NCT02839317> [Accessed 11 August 2020].
- 212 Clinicaltrials.gov. Description of Perianal Lesions in a Cohort of Crohn's Disease Patients (LAPCROHN). Trial ID: NCT02899013. 2016. Status: Completed. Available from: <https://clinicaltrials.gov/ct2/show/record/NCT02899013> [Accessed 11 August 2020].
- 213 Clinicaltrials.gov. Urinary and Anorectal Functional Disorders and Their Impact on CF Adults (PerineoMucoRMO) (PerineoMuco). Trial ID: NCT02894619. 2016. Status: Completed. Available from: <https://clinicaltrials.gov/ct2/show/record/NCT02894619> [Accessed 11 August 2020].
- 214 Clinicaltrials.gov. Dynamics of Inflammation and Its Blockade on Motivational Circuitry in Depression. Trial ID: NCT03006393. 2016. Status: Recruiting. Available from: <https://clinicaltrials.gov/ct2/show/record/NCT03006393> [Accessed 11 August 2020].

- 215 Clinicaltrials.gov. Retrospective Study of IBS-D Patients Previously Receiving SBI. Trial ID: NCT02661425. 2016. Status: Completed. Available from: <https://clinicaltrials.gov/ct2/show/record/NCT02661425> [Accessed 11 August 2020].
- 216 Clinicaltrials.gov. Fiber and Water Improve Bowel Habit in Humans. Trial ID: NCT02838849. 2016. Status: Completed. Available from: <https://clinicaltrials.gov/ct2/show/record/NCT02838849> [Accessed 11 August 2020].
- 217 Clinicaltrials.gov. Open-Label- Multi-Center- Two-Part- Ph1 Study to Characterize the PKs of an Intravenous Micro-Dose of [14C]-Tazemetostat (EPZ 6438) and the ADME of an Oral [14C]-Labeled Dose of Tazemetostat in Subjects With B-Cell Lymphomas or Adv Solid Tumors. Trial ID: NCT03010982. 2016. Status: Completed. Available from: <https://clinicaltrials.gov/ct2/show/record/NCT03010982> [Accessed 11 August 2020].
- 218 Clinicaltrials.gov. Fulvestrant or Aromatase Inhibitor and Palbociclib in Treating Older Patients With Hormone Responsive Breast Cancer That Cannot Be Removed by Surgery. Trial ID: NCT02760030. 2016. Status: Recruiting. Available from: <https://clinicaltrials.gov/ct2/show/record/NCT02760030> [Accessed 11 August 2020].
- 219 Clinicaltrials.gov. Pembrolizumab- Bevacizumab- and Cyclophosphamide in Treating Patients With Recurrent Ovarian- Fallopian Tube- or Primary Peritoneal Cancer. Trial ID: NCT02853318. 2016. Status: Active- Not Recruiting. Available from: <https://clinicaltrials.gov/ct2/show/record/NCT02853318> [Accessed 11 August 2020].
- 220 Clinicaltrials.gov. Fatigue Management in Quiescent IBD. Trial ID: NCT02709434. 2016. Status: Other. Available from: <https://clinicaltrials.gov/ct2/show/record/NCT02709434> [Accessed 11 August 2020].
- 221 Clinicaltrials.gov. Comparison of Microbiota and Quality of Life for a Low FODMAPs and Standard Dietary in Irritable Bowel Syndrome Patients. Trial ID: NCT02902926. 2016. Status: Other. Available from: <https://clinicaltrials.gov/ct2/show/record/NCT02902926> [Accessed 11 August 2020].
- 222 Clinicaltrials.gov. Safety of 250ml Preoperative Carbohydrate Drink in Gastric Cancer Patients. Trial ID: NCT02815150. 2016. Status: Completed. Available from: <https://clinicaltrials.gov/ct2/show/record/NCT02815150> [Accessed 11 August 2020].
- 223 Clinicaltrials.gov. Geriatric-CO-mAnagement for Cardiology Patients in the Hospital (G-COACH). Trial ID: NCT02890927. 2016. Status: Completed. Available from: <https://clinicaltrials.gov/ct2/show/record/NCT02890927> [Accessed 11 August 2020].
- 224 Clinicaltrials.gov. Trial of Panobinostat in Children With Diffuse Intrinsic Pontine Glioma (PBTC-047). Trial ID: NCT02717455. 2016. Status: Recruiting. Available from: <https://clinicaltrials.gov/ct2/show/record/NCT02717455> [Accessed 11 August 2020].
- 225 Clinicaltrials.gov. Determining Lipid Content in Stool After Alpha-cyclodextrin (FMAT). Trial ID: NCT03002168. 2016. Status: Completed. Available from: <https://clinicaltrials.gov/ct2/show/record/NCT03002168> [Accessed 11 August 2020].
- 226 Clinicaltrials.gov. FBCx (Alpha-CD) Mechanism of Action Trial (FMAT). Trial ID: NCT02999620. 2016. Status: Completed. Available from: <https://clinicaltrials.gov/ct2/show/record/NCT02999620> [Accessed 11 August 2020].
- 227 Clinicaltrials.gov. The Role of Gut Microbiota in Heart Failure and Pre-Heart Failure With Preserved Ejection Fraction. Trial ID: NCT02728154. 2016. Status: Recruiting. Available from: <https://clinicaltrials.gov/ct2/show/record/NCT02728154> [Accessed 11 August 2020].
- 228 Clinicaltrials.gov. HET Bipolar System: Validation of Outpatient Hemorrhoid Treatment (HET). Trial ID: NCT02773420. 2016. Status: Other. Available from: <https://clinicaltrials.gov/ct2/show/record/NCT02773420> [Accessed 11 August 2020].
- 229 Clinicaltrials.gov. Effects of the Probiotic Visbiome Extra Strength on Gut Microbiome & Immune Activation Markers. Trial ID: NCT02706717. 2016. Status: Completed. Available from: <https://clinicaltrials.gov/ct2/show/record/NCT02706717> [Accessed 11 August 2020].
- 230 Clinicaltrials.gov. Optimization of a Tenofovir Enema for HIV Prevention (DREAM-01). Trial ID: NCT02750540. 2016. Status: Completed. Available from: <https://clinicaltrials.gov/ct2/show/record/NCT02750540> [Accessed 11 August 2020].
- 231 Clinicaltrials.gov. Fecal Metabolome and the Intestinal Microbiota in Irritable Bowel Syndrome (IBS). Trial ID: NCT02981888. 2016. Status: Recruiting. Available from: <https://clinicaltrials.gov/ct2/show/record/NCT02981888> [Accessed 11 August 2020].
- 232 Clinicaltrials.gov. A Study to Evaluate LB1148 for Return of Gastrointestinal Function and Adhesions in Subjects Undergoing Bowel Resection (PROFILE). Trial ID: NCT02836470. 2016. Status: Recruiting. Available from: <https://clinicaltrials.gov/ct2/show/record/NCT02836470> [Accessed 11 August 2020].



- 233 Clinicaltrials.gov. A Study on the Effectiveness of a Nutritional Supplement With Natural Mastiha in Inflammatory Bowel Diseases. Trial ID: NCT02796339. 2016. Status: Active- Not Recruiting. Available from: <https://clinicaltrials.gov/ct2/show/record/NCT02796339> [Accessed 11 August 2020].
- 234 Clinicaltrials.gov. Non-interventional Study of Moderate to Severe Inflammatory Bowel Disease in Brazil. Trial ID: NCT02822235. 2016. Status: Completed. Available from: <https://clinicaltrials.gov/ct2/show/record/NCT02822235> [Accessed 11 August 2020].
- 235 Clinicaltrials.gov. Gut Microbiota Reconstruction in the Treatment of Irritable Bowel Syndrome With Predominant Diarrhea. Trial ID: NCT02651740. 2016. Status: Recruiting. Available from: <https://clinicaltrials.gov/ct2/show/record/NCT02651740> [Accessed 11 August 2020].
- 236 Clinicaltrials.gov. Effect of Fecal Microbiota Transplantation in Irritable Bowel Syndrome. Trial ID: NCT02788071. 2016. Status: Completed. Available from: <https://clinicaltrials.gov/ct2/show/record/NCT02788071> [Accessed 11 August 2020].
- 237 Clinicaltrials.gov. Peppermint Oil for the Treatment of Irritable Bowel Syndrome: Optimizing Therapeutic Strategies Using Targeted Delivery (PERSUADE). Trial ID: NCT02716285. 2016. Status: Completed. Available from: <https://clinicaltrials.gov/ct2/show/record/NCT02716285> [Accessed 11 August 2020].
- 238 Clinicaltrials.gov. Efficacy of Eluxadoline in the Treatment of Irritable Bowel Syndrome With Diarrhea in Patients With Inadequate Control of Symptoms With Prior Loperamide Use. Trial ID: NCT02959983. 2016. Status: Completed. Available from: <https://clinicaltrials.gov/ct2/show/record/NCT02959983> [Accessed 11 August 2020].
- 239 Clinicaltrials.gov. Risk Factors for Incontinence-Associated Dermatitis (IAD) in ICU Patients Suffering From Fecal Incontinence. Trial ID: NCT02996357. 2016. Status: Completed. Available from: <https://clinicaltrials.gov/ct2/show/record/NCT02996357> [Accessed 11 August 2020].
- 240 Clinicaltrials.gov. Impact of Remote Ischemic Postconditioning on Autonomic Function in Stroke Patients (IRAS). Trial ID: NCT02777099. 2016. Status: Other. Available from: <https://clinicaltrials.gov/ct2/show/record/NCT02777099> [Accessed 11 August 2020].
- 241 Clinicaltrials.gov. Fast-track Surgery After Gynecological Oncology Surgery. Trial ID: NCT02687412. 2016. Status: Completed. Available from: <https://clinicaltrials.gov/ct2/show/record/NCT02687412> [Accessed 11 August 2020].
- 242 Clinicaltrials.gov. Zanubrutinib (BGB-3111) in Combination With Tislelizumab (BGB-A317) in Participants With B-cell Malignancies. Trial ID: NCT02795182. 2016. Status: Active- Not Recruiting. Available from: <https://clinicaltrials.gov/ct2/show/record/NCT02795182> [Accessed 11 August 2020].
- 243 Clinicaltrials.gov. Optimising Antibiotic Treatment for Sick Malnourished Children (FLACSAM-PK). Trial ID: NCT02746276. 2016. Status: Other. Available from: <https://clinicaltrials.gov/ct2/show/record/NCT02746276> [Accessed 11 August 2020].
- 244 Clinicaltrials.gov. Pembrolizumab in Treating Patients With Small Bowel Adenocarcinoma That is Metastatic or Locally Advanced and Cannot Be Removed by Surgery. Trial ID: NCT02949219. 2016. Status: Active- Not Recruiting. Available from: <https://clinicaltrials.gov/ct2/show/record/NCT02949219> [Accessed 11 August 2020].
- 245 Clinicaltrials.gov. Metastatic Tumor Research and Outcomes Network (MTRON). Trial ID: NCT02830451. 2016. Status: Recruiting. Available from: <https://clinicaltrials.gov/ct2/show/record/NCT02830451> [Accessed 11 August 2020].
- 246 Clinicaltrials.gov. Developing Rectal USPE Measures for Suppositories (Project DRUM-S) (DRUM-S). Trial ID: NCT02744261. 2016. Status: Active- Not Recruiting. Available from: <https://clinicaltrials.gov/ct2/show/record/NCT02744261> [Accessed 11 August 2020].
- 247 Clinicaltrials.gov. Older Person's Exercise and Nutrition Study (OPEN). Trial ID: NCT02702037. 2016. Status: Completed. Available from: <https://clinicaltrials.gov/ct2/show/record/NCT02702037> [Accessed 11 August 2020].
- 248 Clinicaltrials.gov. Investigating Indirect Mechanism of Neuroprotection of Tecfidera (Dimethyl Fumarate) in RRMS and Progressive Patients. Trial ID: NCT03092544. 2016. Status: Other. Available from: <https://clinicaltrials.gov/ct2/show/record/NCT03092544> [Accessed 11 August 2020].
- 249 Clinicaltrials.gov. A Trial of CV301 in Combination With Anti-PD-1 Therapy in Subjects With Non-Small Cell Lung Cancer. Trial ID: NCT02840994. 2016. Status: Completed. Available from: <https://clinicaltrials.gov/ct2/show/record/NCT02840994> [Accessed 11 August 2020].
- 250 Clinicaltrials.gov. Nivolumab and Ipilimumab in Treating Patients With Rare Tumors. Trial ID: NCT02834013. 2016. Status: Recruiting. Available from: <https://clinicaltrials.gov/ct2/show/record/NCT02834013> [Accessed 11 August 2020].

- 251 Clinicaltrials.gov. Defining the Role of the Gut Microbiome in Mediating the Effects of Obesity on Intestinal Stem Cells. Trial ID: NCT02863029. 2016. Status: Active- Not Recruiting. Available from: <https://clinicaltrials.gov/ct2/show/record/NCT02863029> [Accessed 11 August 2020].
- 252 Clinicaltrials.gov. Obstetric and Proctology Support of Patients With Perineums Suits. Trial ID: NCT02823717. 2016. Status: Active- Not Recruiting. Available from: <https://clinicaltrials.gov/ct2/show/record/NCT02823717> [Accessed 11 August 2020].
- 253 Clinicaltrials.gov. Shifting Rehabilitation Paradigms in Skilled Nursing Facilities. Trial ID: NCT02927171. 2016. Status: Completed. Available from: <https://clinicaltrials.gov/ct2/show/record/NCT02927171> [Accessed 11 August 2020].
- 254 Clinicaltrials.gov. Efficacy Assessment of the Cell Therapy Medicine NC1 in Patients With Post-traumatic Syringomyelia (CME-LEM4). Trial ID: NCT02807142. 2016. Status: Completed. Available from: <https://clinicaltrials.gov/ct2/show/record/NCT02807142> [Accessed 11 August 2020].
- 255 Clinicaltrials.gov. Nutritional Impact of Serum-Derived Bovine Immunoglobulin Protein Isolate in Subjects With IPAA. Trial ID: NCT02828410. 2016. Status: Completed. Available from: <https://clinicaltrials.gov/ct2/show/record/NCT02828410> [Accessed 11 August 2020].
- 256 Clinicaltrials.gov. Pivotal Study of MRI-guided Transurethral Ultrasound Ablation in Patients With Localized Prostate Cancer. Trial ID: NCT02766543. 2016. Status: Active- Not Recruiting. Available from: <https://clinicaltrials.gov/ct2/show/record/NCT02766543> [Accessed 11 August 2020].
- 257 Clinicaltrials.gov. NBTXR3 Nanoparticles and EBRT or EBRT With Brachytherapy in the Treatment of Prostate Adenocarcinoma. Trial ID: NCT02805894. 2016. Status: Recruiting. Available from: <https://clinicaltrials.gov/ct2/show/record/NCT02805894> [Accessed 11 August 2020].
- 258 Clinicaltrials.gov. Atezolizumab in Treating Patients With Recurrent BCG-Unresponsive Non-muscle Invasive Bladder Cancer. Trial ID: NCT02844816. 2016. Status: Active- Not Recruiting. Available from: <https://clinicaltrials.gov/ct2/show/record/NCT02844816> [Accessed 11 August 2020].
- 259 Clinicaltrials.gov. A Study of Efficacy and Safety of M2951 in Subjects With Relapsing Multiple Sclerosis. Trial ID: NCT02975349. 2016. Status: Active- Not Recruiting. Available from: <https://clinicaltrials.gov/ct2/show/record/NCT02975349> [Accessed 11 August 2020].
- 260 Clinicaltrials.gov. RSV-MVA-BN Vaccine Phase II Trial in 55 Year Old Adults. Trial ID: NCT02873286. 2016. Status: Completed. Available from: <https://clinicaltrials.gov/ct2/show/record/NCT02873286> [Accessed 11 August 2020].
- 261 Clinicaltrials.gov. A Study to Assess the Safety- Tolerability- and Pharmacokinetics of ASP5094 Following Multiple Intravenous Doses in Subjects With Rheumatoid Arthritis on Methotrexate. Trial ID: NCT02698657. 2016. Status: Completed. Available from: <https://clinicaltrials.gov/ct2/show/record/NCT02698657> [Accessed 11 August 2020].
- 262 Clinicaltrials.gov. Investigating Typhoid Fever Pathogenesis (TYGER). Trial ID: NCT03067961. 2016. Status: Active- Not Recruiting. Available from: <https://clinicaltrials.gov/ct2/show/record/NCT03067961> [Accessed 11 August 2020].
- 263 Clinicaltrials.gov. A Study to Evaluate the Efficacy and Safety of SEP-363856 in Acutely Psychotic Adults With Schizophrenia. Trial ID: NCT02969382. 2016. Status: Completed. Available from: <https://clinicaltrials.gov/ct2/show/record/NCT02969382> [Accessed 11 August 2020].
- 264 Clinicaltrials.gov. Short Bowel Syndrome Research Study for Children Up To 17 Years of Age on Parenteral Nutrition. Trial ID: NCT02682381. 2016. Status: Completed. Available from: <https://clinicaltrials.gov/ct2/show/record/NCT02682381> [Accessed 11 August 2020].
- 265 Clinicaltrials.gov. Study in Japanese Pediatric Subjects With Short Bowel Syndrome (SBS) Who Are Dependent on Parenteral Support. Trial ID: NCT02980666. 2016. Status: Completed. Available from: <https://clinicaltrials.gov/ct2/show/record/NCT02980666> [Accessed 11 August 2020].
- 266 Clinicaltrials.gov. Gait Pattern Analysis and Feasibility of Gait Training With a Walking Assist Robot in Stroke Patients and Elderly Adults. Trial ID: NCT02843828. 2016. Status: Completed. Available from: <https://clinicaltrials.gov/ct2/show/record/NCT02843828> [Accessed 11 August 2020].
- 267 Clinicaltrials.gov. Clinical and Biological Characterization of Patients and Collection of Samples (THE-RNA). Trial ID: NCT04499040. 2016. Status: Not Yet Recruiting. Available from: <https://clinicaltrials.gov/ct2/show/record/NCT04499040> [Accessed 11 August 2020].
- 268 Clinicaltrials.gov. TD-1473 for Active Ulcerative Colitis (UC). Trial ID: NCT02818686. 2016. Status: Completed. Available from: <https://clinicaltrials.gov/ct2/show/record/NCT02818686> [Accessed 11 August 2020].
- 269 Clinicaltrials.gov. A Study to Evaluate the Safety and Efficacy of Upadacitinib (ABT-494) for Induction and Maintenance Therapy in Subjects With Moderately to Severely Active Ulcerative Colitis (UC). Trial ID:

- NCT02819635. 2016. Status: Recruiting. Available from: <https://clinicaltrials.gov/ct2/show/record/NCT02819635> [Accessed 11 August 2020].
- 270 Clinicaltrials.gov. A Study to Evaluate the Long-Term Safety and Efficacy of Upadacitinib (ABT-494) in Subjects With Ulcerative Colitis (UC). Trial ID: NCT03006068. 2016. Status: Invitation. Available from: <https://clinicaltrials.gov/ct2/show/record/NCT03006068> [Accessed 11 August 2020].
- 271 Clinicaltrials.gov. Evaluation of the Fast Fill Technique for Anal Acoustic Reflectometry (AAR) in the Incontinent Anal Sphincter. Trial ID: NCT02782364. 2016. Status: Other. Available from: <https://clinicaltrials.gov/ct2/show/record/NCT02782364> [Accessed 11 August 2020].
- 272 Clinicaltrials.gov. First Time Mothers and Anal Incontinence Six Years Postpartum (FITMAI6). Trial ID: NCT02792244. 2016. Status: Completed. Available from: <https://clinicaltrials.gov/ct2/show/record/NCT02792244> [Accessed 11 August 2020].
- 273 Clinicaltrials.gov. LIBERATE - PRO: Eclipse System Registry (LIBERATEPRO). Trial ID: NCT03028636. 2016. Status: Completed. Available from: <https://clinicaltrials.gov/ct2/show/record/NCT03028636> [Accessed 11 August 2020].
- 274 Clinicaltrials.gov. Long Term Efficacy of Sacral Nerve Modulation (SNM) in Patients With Constipation or Stool Incontinence. Trial ID: NCT02836717. 2016. Status: Completed. Available from: <https://clinicaltrials.gov/ct2/show/record/NCT02836717> [Accessed 11 August 2020].
- 275 EU Clinical Trials Register. A Phase 3- Randomized- Double-Blind- Double-Dummy- Multicenter- Prospective Study to Assess the Efficacy and Safety of Eravacycline Compared with Meropenem in Complicated Intra-abdominal Infections 3 - - - -; IGNITE4. Trial ID: 2016-002208-21/BG. 2016. Status: Completed. Available from: <https://www.clinicaltrialsregister.eu/ctr-search/trial/2016-002208-21/BG> [Accessed 11 August 2020].
- 276 EU Clinical Trials Register. A 24-Week Double-blind- Safety- Efficacy- and Pharmacodynamic Study Investigating Two Doses of Teduglutide in Pediatric Subjects Through 17 Years of Age with Short Bowel Syndrome who are Dependent on Parenteral Support latest PIP agreement P/0137/2015. Trial ID: 2015-002252-27/GB. 2016. Status: Completed. Available from: <https://www.clinicaltrialsregister.eu/ctr-search/trial/2015-002252-27/GB> [Accessed 11 August 2020].
- 277 EU Clinical Trials Register. A Phase 2a- Randomized- Double-Blind- Placebo Controlled- Parallel-Group Study to Evaluate the Efficacy and Safety of AMG 714 in Adult Patients with Type II Refractory Celiac Disease- an In Situ Small Bowel T Cell Lymphoma. Satunnaistettu- sokkoutettu ja lumekontrolloitu I ketutkimus- jossa tutkitaan AMG714 -tutkimusl kkeen tehoa ja turvallisuutta ruokavaliohoitoon reagoimattomassa aikuisten refraktaarikeliakiataudissa- johon liittyy ohutsuolen T-solulymfooman riski. Trial ID: 2015-004063-36/FI. 2016. Status: Completed. Available from: <https://www.clinicaltrialsregister.eu/ctr-search/trial/2015-004063-36/FI> [Accessed 11 August 2020].
- 278 ISRCTN Registry. Enterogel in treatment of acute diarrhoea in adults. Trial ID: ISRCTN20758708. 2016. Status: Completed. Available from: <http://www.isrctn.com/ISRCTN20758708> [Accessed 11 August 2020].
- 279 ISRCTN Registry. Nutritional support algorithm for critically ill patients. Trial ID: ISRCTN10583582. 2016. Status: Completed. Available from: <http://www.isrctn.com/ISRCTN10583582> [Accessed 11 August 2020].
- 280 ISRCTN Registry. Understanding the role of potassium on hydration and fluid balance. Trial ID: ISRCTN50989296. 2016. Status: Completed. Available from: <http://www.isrctn.com/ISRCTN50989296> [Accessed 11 August 2020].
- 281 ISRCTN Registry. Continuous TAP blocks for major gynaecological surgery. Trial ID: ISRCTN60295543. 2016. Status: Completed. Available from: <http://www.isrctn.com/ISRCTN60295543> [Accessed 11 August 2020].
- 282 ISRCTN Registry. Effectiveness of 'home-but not alone' mobile-health application on parental outcomes. Trial ID: ISRCTN99092313. 2016. Status: Completed. Available from: <http://www.isrctn.com/ISRCTN99092313> [Accessed 11 August 2020].
- 283 ISRCTN Registry. Dietary Interventions in inflammatory bowel disease (IBD). Trial ID: ISRCTN17061468. 2016. Status: Completed. Available from: <http://www.isrctn.com/ISRCTN17061468> [Accessed 11 August 2020].
- 284 ISRCTN Registry. LaCeS Feasibility: Laparoscopic versus open colorectal surgery in the acute setting. Trial ID: ISRCTN15681041. 2016. Status: Completed. Available from: <http://www.isrctn.com/ISRCTN15681041> [Accessed 11 August 2020].
- 285 UMIN Clinical Trials Registry (UMIN-CTR). A prospective multicenter clinical research of transanal irrigation in patients with faecal incontinence or chronic constipation resistant to conservative bowel management. Trial ID: UMIN000024950. 2016. Status: Completed. Available from: [https://upload.umin.ac.jp/cgi-open-bin/ctr\\_e/ctr\\_view.cgi?recptno=R000028600](https://upload.umin.ac.jp/cgi-open-bin/ctr_e/ctr_view.cgi?recptno=R000028600) [Accessed 11 August 2020].
- 286 Australian New Zealand Clinical Trials Registry (ANZCTR). Surveying the health of women associated with Universal Medicine. Trial ID: ACTRN12617000972325. 2017. Status: Completed. Available from:

- <https://www.anzctr.org.au/Trial/Registration/TrialReview.aspx?id=373120&isReview=true> [Accessed 11 August 2020].
- 287 Australian New Zealand Clinical Trials Registry (ANZCTR). Teleconsulting versus normal consulting in the care of inflammatory bowel disease in rural Southern District Health Board patients. Trial ID: ACTRN12617000389303. 2017. Status: Recruiting. Available from: <https://www.anzctr.org.au/Trial/Registration/TrialReview.aspx?id=372543&isReview=true> [Accessed 11 August 2020].
- 288 Australian New Zealand Clinical Trials Registry (ANZCTR). IBDmindfulness-mindfulness for youth with Inflammatory Bowel Disease (IBD) and depression trial. Trial ID: ACTRN12617000876392. 2017. Status: Recruiting. Available from: <https://www.anzctr.org.au/Trial/Registration/TrialReview.aspx?id=373115&isReview=true> [Accessed 11 August 2020].
- 289 Australian New Zealand Clinical Trials Registry (ANZCTR). Effectiveness of oral Solifenacin versus minimally invasive surgery in treatment of urge incontinence. Trial ID: ACTRN12617000284369. 2017. Status: Recruiting. Available from: <https://www.anzctr.org.au/Trial/Registration/TrialReview.aspx?id=372076&isReview=true> [Accessed 11 August 2020].
- 290 Australian New Zealand Clinical Trials Registry (ANZCTR). Can an increase in consumption of dietary fibre improve gut flora profile- bowel habit and sense of wellbeing in healthy adults? Trial ID: ACTRN12617000205336. 2017. Status: Completed. Available from: <https://www.anzctr.org.au/Trial/Registration/TrialReview.aspx?id=372124&isReview=true> [Accessed 11 August 2020].
- 291 Australian New Zealand Clinical Trials Registry (ANZCTR). A Unique Approach to Exercise in Patients with Inflammatory Bowel Disease - A Pilot Study. Trial ID: ACTRN12617000526370. 2017. Status: Active- Not Recruiting. Available from: <https://www.anzctr.org.au/Trial/Registration/TrialReview.aspx?id=372707&isReview=true> [Accessed 11 August 2020].
- 292 Australian New Zealand Clinical Trials Registry (ANZCTR). Personalised pelvic floor Muscle Training for Urinary incontinence after Prostatectomy. Trial ID: ACTRN12617000788370. 2017. Status: Recruiting. Available from: <https://www.anzctr.org.au/Trial/Registration/TrialReview.aspx?id=372360&isReview=true> [Accessed 11 August 2020].
- 293 Australian New Zealand Clinical Trials Registry (ANZCTR). Pelvic Floor Muscle Exercise Training in Prostatectomy Patients. Trial ID: ACTRN12617001400358. 2017. Status: Completed. Available from: <https://www.anzctr.org.au/Trial/Registration/TrialReview.aspx?id=373697&isReview=true> [Accessed 11 August 2020].
- 294 Australian New Zealand Clinical Trials Registry (ANZCTR). Virtual chromoendoscopy vs standard dye-based chromoendoscopy in Inflammatory Bowel Disease (IBD) surveillance. Trial ID: ACTRN12617000390381p. 2017. Status: Not Yet Recruiting. Available from: <https://www.anzctr.org.au/Trial/Registration/TrialReview.aspx?id=372568&isReview=true> [Accessed 11 August 2020].
- 295 Australian New Zealand Clinical Trials Registry (ANZCTR). Effects of lateral episiotomy on the function of pelvic floor and sexual function after vaginal delivery in primiparas. Trial ID: ACTRN12617000437369. 2017. Status: Completed. Available from: <https://www.anzctr.org.au/Trial/Registration/TrialReview.aspx?id=371894&isReview=true> [Accessed 11 August 2020].
- 296 Clinical Trials Registry - India (CTRI). A comparative study of UBLAC vs placebo to evaluate its safety and efficacy in children between 4-12 (Both inclusive). Trial ID: CTRI/2017/02/007810. 2017. Status: Not Available. Available from: <http://ctri.nic.in/Clinicaltrials/pmaindet2.php?trialid=14302> [Accessed 11 August 2020].
- 297 Clinical Trials Registry - India (CTRI). Clinical evaluation of Ayurvedic formulation in the Management of parikartika (Fissure in Ano). Trial ID: CTRI/2017/06/008773. 2017. Status: Not Available. Available from: <http://ctri.nic.in/Clinicaltrials/pmaindet2.php?trialid=16565> [Accessed 11 August 2020].
- 298 Clinical Trials Registry - India (CTRI). cricoid pressure (pressure in front of neck to prevent soiling of lungs from the contents of the stomach) and videolaryngoscopy (equipment used to facilitate tube passage inside the windpipe). Trial ID: CTRI/2017/12/010960. 2017. Status: Not Available. Available from: <http://ctri.nic.in/Clinicaltrials/pmaindet2.php?trialid=20093> [Accessed 11 August 2020].

- 299 Clinicaltrials.gov. Safety Study of BMX-001 (Radio-protector) in Patients With Newly Diagnosed Anal Cancer. Trial ID: NCT03386500. 2017. Status: Recruiting. Available from: <https://clinicaltrials.gov/ct2/show/record/NCT03386500> [Accessed 11 August 2020].
- 300 Clinicaltrials.gov. Assessment of the Predictive Value of the Acetic Acid Test in Surgery Condition for the Detection of Dysplastic Lesions in Patients With Anal Condylomatosis. Trial ID: NCT03126123. 2017. Status: Completed. Available from: <https://clinicaltrials.gov/ct2/show/record/NCT03126123> [Accessed 11 August 2020].
- 301 Clinicaltrials.gov. Effects of High-Intensity Focused Ultrasound (HIFU) Treatment on Fecal Continence and Anorretal Fisiology. Trial ID: NCT03289221. 2017. Status: Completed. Available from: <https://clinicaltrials.gov/ct2/show/record/NCT03289221> [Accessed 11 August 2020].
- 302 Clinicaltrials.gov. Laparoscopically Assisted Anorectal Pull-through Versus Posterior Sagittal Anorectoplasty. Trial ID: NCT03174028. 2017. Status: Other. Available from: <https://clinicaltrials.gov/ct2/show/record/NCT03174028> [Accessed 11 August 2020].
- 303 Clinicaltrials.gov. Safety and Efficacy of Low-volume Preparation in the Elderly: Oral Sulfate Solution. Trial ID: NCT03112967. 2017. Status: Completed. Available from: <https://clinicaltrials.gov/ct2/show/record/NCT03112967> [Accessed 11 August 2020].
- 304 Clinicaltrials.gov. Chromoendoscopy in Inflammatory Bowel Disease. Trial ID: NCT03250780. 2017. Status: Recruiting. Available from: <https://clinicaltrials.gov/ct2/show/record/NCT03250780> [Accessed 11 August 2020].
- 305 Clinicaltrials.gov. Effect of Weight Reduction on Constipation (constipation). Trial ID: NCT03106857. 2017. Status: Completed. Available from: <https://clinicaltrials.gov/ct2/show/record/NCT03106857> [Accessed 11 August 2020].
- 306 Clinicaltrials.gov. Study of Durvalumab (MEDI4736) After Chemo-Radiation for Microsatellite Stable Stage II-IV Rectal Cancer. Trial ID: NCT03102047. 2017. Status: Recruiting. Available from: <https://clinicaltrials.gov/ct2/show/record/NCT03102047> [Accessed 11 August 2020].
- 307 Clinicaltrials.gov. Transanal Total Mesorectal Excision for Rectal Cancer on Anal Physiology + Fecal Incontinence. Trial ID: NCT03283540. 2017. Status: Recruiting. Available from: <https://clinicaltrials.gov/ct2/show/record/NCT03283540> [Accessed 11 August 2020].
- 308 Clinicaltrials.gov. Multicenter Phase II Study of Transanal TME (taTME). Trial ID: NCT03144765. 2017. Status: Recruiting. Available from: <https://clinicaltrials.gov/ct2/show/record/NCT03144765> [Accessed 11 August 2020].
- 309 Clinicaltrials.gov. ESD Versus TAMIS for Early Rectal Neoplasms. Trial ID: NCT03217773. 2017. Status: Recruiting. Available from: <https://clinicaltrials.gov/ct2/show/record/NCT03217773> [Accessed 11 August 2020].
- 310 Clinicaltrials.gov. Alternative to Intensive Management of the Active Phase of the Second Stage of Labor (PASST). Trial ID: NCT03018860. 2017. Status: Recruiting. Available from: <https://clinicaltrials.gov/ct2/show/record/NCT03018860> [Accessed 11 August 2020].
- 311 Clinicaltrials.gov. Impact of Traditional Chinese Medicine on the Gut Microbiota-dependent Trimethylamine N-oxide (TCM-TMAO). Trial ID: NCT03186625. 2017. Status: Other. Available from: <https://clinicaltrials.gov/ct2/show/record/NCT03186625> [Accessed 11 August 2020].
- 312 Clinicaltrials.gov. DC/AML Fusion Cell Vaccine vs Observation in Patients Who Achieve a Chemotherapy-induced Remission. Trial ID: NCT03059485. 2017. Status: Recruiting. Available from: <https://clinicaltrials.gov/ct2/show/record/NCT03059485> [Accessed 11 August 2020].
- 313 Clinicaltrials.gov. Efficacy and Safety in a Randomised Acute Pain Study of MR308: STARDOM2. (STARDOM2). Trial ID: NCT03062644. 2017. Status: Completed. Available from: <https://clinicaltrials.gov/ct2/show/record/NCT03062644> [Accessed 11 August 2020].
- 314 Clinicaltrials.gov. Dietary Carbohydrate and Internal Body Fat (CARBFUNC). Trial ID: NCT03401970. 2017. Status: Active- Not Recruiting. Available from: <https://clinicaltrials.gov/ct2/show/record/NCT03401970> [Accessed 11 August 2020].
- 315 Clinicaltrials.gov. Alpelisib and Enzalutamide in Treating Patients With Androgen Receptor and PTEN Positive Metastatic Breast Cancer. Trial ID: NCT03207529. 2017. Status: Recruiting. Available from: <https://clinicaltrials.gov/ct2/show/record/NCT03207529> [Accessed 11 August 2020].
- 316 Clinicaltrials.gov. Exploring Gut-Brain and Brain-Gut Interactions in Alcohol Use Disorder Via Microbiota Investigations: A Pilot Study. Trial ID: NCT03152760. 2017. Status: Recruiting. Available from: <https://clinicaltrials.gov/ct2/show/record/NCT03152760> [Accessed 11 August 2020].
- 317 Clinicaltrials.gov. LIFT Technique Versus Seton in Management of Anal Fistula. Trial ID: NCT03311035. 2017. Status: Other. Available from: <https://clinicaltrials.gov/ct2/show/record/NCT03311035> [Accessed 11 August 2020].



- 318 Clinicaltrials.gov. Trametinib in Combination With Paclitaxel in the Treatment of Anaplastic Thyroid Cancer. Trial ID: NCT03085056. 2017. Status: Recruiting. Available from: <https://clinicaltrials.gov/ct2/show/record/NCT03085056> [Accessed 11 August 2020].
- 319 Clinicaltrials.gov. Ano-genital Human Papillomavirus (HPV) Infection- Precancerous Lesions and Genital Warts Among Danish Renal Transplant Recipients. Trial ID: NCT03018327. 2017. Status: Completed. Available from: <https://clinicaltrials.gov/ct2/show/record/NCT03018327> [Accessed 11 August 2020].
- 320 Clinicaltrials.gov. Per-operative Ultrasonographic Assessment of the Placement of the Mesh in Laparoscopic Sacral Colpo/Hysteropexy (SONOMESH). Trial ID: NCT03410303. 2017. Status: Recruiting. Available from: <https://clinicaltrials.gov/ct2/show/record/NCT03410303> [Accessed 11 August 2020].
- 321 Clinicaltrials.gov. Evaluation of SAR440340 and as Combination Therapy With Dupilumab in Moderate-to-Severe Asthma Patients. Trial ID: NCT03387852. 2017. Status: Completed. Available from: <https://clinicaltrials.gov/ct2/show/record/NCT03387852> [Accessed 11 August 2020].
- 322 Clinicaltrials.gov. Intravenous Lidocaine for Post-Operative Pain Control in Patients Undergoing Bariatric Bowel Surgery. Trial ID: NCT03095404. 2017. Status: Not Yet Recruiting. Available from: <https://clinicaltrials.gov/ct2/show/record/NCT03095404> [Accessed 11 August 2020].
- 323 Clinicaltrials.gov. Ibrutinib in Preventing Acute Leukemia in Patients After Reduced-Intensity Conditioning and Stem Cell Transplant. Trial ID: NCT03267186. 2017. Status: Recruiting. Available from: <https://clinicaltrials.gov/ct2/show/record/NCT03267186> [Accessed 11 August 2020].
- 324 Clinicaltrials.gov. A Study of GDC-9545 Alone or in Combination With Palbociclib and/or Luteinizing Hormone-Releasing Hormone (LHRH) Agonist in Locally Advanced or Metastatic Estrogen Receptor-Positive Breast Cancer. Trial ID: NCT03332797. 2017. Status: Recruiting. Available from: <https://clinicaltrials.gov/ct2/show/record/NCT03332797> [Accessed 11 August 2020].
- 325 Clinicaltrials.gov. Epidemiology and Pathophysiology of Post-Infectious Functional GI Disorders. Trial ID: NCT03266068. 2017. Status: Active- Not Recruiting. Available from: <https://clinicaltrials.gov/ct2/show/record/NCT03266068> [Accessed 11 August 2020].
- 326 Clinicaltrials.gov. Highly Conformal- Hypofractionated- Focally Dose Escalated Post-Prostatectomy Radiotherapy. Trial ID: NCT03388619. 2017. Status: Recruiting. Available from: <https://clinicaltrials.gov/ct2/show/record/NCT03388619> [Accessed 11 August 2020].
- 327 Clinicaltrials.gov. The Effect of Probiotics on Chronic Kidney Disease. Trial ID: NCT03228563. 2017. Status: Recruiting. Available from: <https://clinicaltrials.gov/ct2/show/record/NCT03228563> [Accessed 11 August 2020].
- 328 Clinicaltrials.gov. Targin for Chronic Pain Management in Patients With Spinal Cord Injury. Trial ID: NCT03179475. 2017. Status: Recruiting. Available from: <https://clinicaltrials.gov/ct2/show/record/NCT03179475> [Accessed 11 August 2020].
- 329 Clinicaltrials.gov. Transverse Colostomy for Refractory Hemorrhagic Chronic Radiation Proctitis: a Prospective Cohort Study. Trial ID: NCT03397901. 2017. Status: Recruiting. Available from: <https://clinicaltrials.gov/ct2/show/record/NCT03397901> [Accessed 11 August 2020].
- 330 Clinicaltrials.gov. Novel Tracer Methods to Evaluate Muscle Protein Metabolism in Cirrhosis. Trial ID: NCT03225677. 2017. Status: Recruiting. Available from: <https://clinicaltrials.gov/ct2/show/record/NCT03225677> [Accessed 11 August 2020].
- 331 Clinicaltrials.gov. A Study of BGB-A317 as Monotherapy in Relapsed or Refractory Classical Hodgkin Lymphoma. Trial ID: NCT03209973. 2017. Status: Active- Not Recruiting. Available from: <https://clinicaltrials.gov/ct2/show/record/NCT03209973> [Accessed 11 August 2020].
- 332 Clinicaltrials.gov. Radiation Therapy With Durvalumab or Cetuximab in Treating Patients With Locoregionally Advanced Head and Neck Cancer Who Cannot Take Cisplatin. Trial ID: NCT03258554. 2017. Status: Recruiting. Available from: <https://clinicaltrials.gov/ct2/show/record/NCT03258554> [Accessed 11 August 2020].
- 333 Clinicaltrials.gov. ObeSity Related Colorectal Adenoma Risk (OSCAR). Trial ID: NCT03663062. 2017. Status: Recruiting. Available from: <https://clinicaltrials.gov/ct2/show/record/NCT03663062> [Accessed 11 August 2020].
- 334 Clinicaltrials.gov. Multicenter Study to Describe the Performance of the AOS-C2001-B Device in Patients With Colostomy. Trial ID: NCT03108105. 2017. Status: Completed. Available from: <https://clinicaltrials.gov/ct2/show/record/NCT03108105> [Accessed 11 August 2020].
- 335 Clinicaltrials.gov. The Effect of CSP01 on Chronic Idiopathic Constipation and Irritable Bowel Syndrome With Constipation. Trial ID: NCT03054506. 2017. Status: Completed. Available from: <https://clinicaltrials.gov/ct2/show/record/NCT03054506> [Accessed 11 August 2020].



- 336 Clinicaltrials.gov. Early MRI Prediction of Crohns. Trial ID: NCT03340519. 2017. Status: Recruiting. Available from: <https://clinicaltrials.gov/ct2/show/record/NCT03340519> [Accessed 11 August 2020].
- 337 Clinicaltrials.gov. The Biologic Onset of Crohn's Disease: A Screening Study in First Degree Relatives. Trial ID: NCT03291743. 2017. Status: Recruiting. Available from: <https://clinicaltrials.gov/ct2/show/record/NCT03291743> [Accessed 11 August 2020].
- 338 Clinicaltrials.gov. PARCT: Trial of Atezolizumab in Relapsed/Refractory Cutaneous T Cell Lymphoma (CTCL) (PARCT). Trial ID: NCT03357224. 2017. Status: Recruiting. Available from: <https://clinicaltrials.gov/ct2/show/record/NCT03357224> [Accessed 11 August 2020].
- 339 Clinicaltrials.gov. The Role of Oral Glutathione on Growth Parameters in Children With Cystic Fibrosis (GROW). Trial ID: NCT03020719. 2017. Status: Completed. Available from: <https://clinicaltrials.gov/ct2/show/record/NCT03020719> [Accessed 11 August 2020].
- 340 Clinicaltrials.gov. The Influence of Glycemic Control and Obesity on Energy Balance and Metabolic Flexibility in Type 1 Diabetes (ACME). Trial ID: NCT03379792. 2017. Status: Recruiting. Available from: <https://clinicaltrials.gov/ct2/show/record/NCT03379792> [Accessed 11 August 2020].
- 341 Clinicaltrials.gov. Rifamycin SV-MMX 600 mg Tablets Administered Three or Two Times Daily to Patients With IBS-D. Trial ID: NCT03099785. 2017. Status: Recruiting. Available from: <https://clinicaltrials.gov/ct2/show/record/NCT03099785> [Accessed 11 August 2020].
- 342 Clinicaltrials.gov. CIPA Phase 1 ECG Biomarker Validation Study. Trial ID: NCT03070470. 2017. Status: Completed. Available from: <https://clinicaltrials.gov/ct2/show/record/NCT03070470> [Accessed 11 August 2020].
- 343 Clinicaltrials.gov. Fractional CO2 Laser Therapy Versus 4% Topical Lidocaine Gel for Dyspareunia in Breast Cancer Survivors (BCLS). Trial ID: NCT03257670. 2017. Status: Other. Available from: <https://clinicaltrials.gov/ct2/show/record/NCT03257670> [Accessed 11 August 2020].
- 344 Clinicaltrials.gov. Trial on Impact on the Hospital Stay- of an Early Oral Nutrition Protocol Applied to Patients After Total Gastrectomy. (DOPGT ). Trial ID: NCT03257280. 2017. Status: Recruiting. Available from: <https://clinicaltrials.gov/ct2/show/record/NCT03257280> [Accessed 11 August 2020].
- 345 Clinicaltrials.gov. Trametinib in Treating Patients With Epithelioid Hemangioendothelioma That Is Metastatic- Locally Advanced- or Cannot Be Removed by Surgery. Trial ID: NCT03148275. 2017. Status: Recruiting. Available from: <https://clinicaltrials.gov/ct2/show/record/NCT03148275> [Accessed 11 August 2020].
- 346 Clinicaltrials.gov. Fertility and Ovarian Reserve Function in the Patient With Inflammatory Bowel Disease. Trial ID: NCT03269916. 2017. Status: Other. Available from: <https://clinicaltrials.gov/ct2/show/record/NCT03269916> [Accessed 11 August 2020].
- 347 Clinicaltrials.gov. Lifestyle Intervention in Preparation for Pregnancy (LIPP). Trial ID: NCT03146156. 2017. Status: Recruiting. Available from: <https://clinicaltrials.gov/ct2/show/record/NCT03146156> [Accessed 11 August 2020].
- 348 Clinicaltrials.gov. Treatment of Anal Fistula With Lasercoagulation. Trial ID: NCT03017898. 2017. Status: Recruiting. Available from: <https://clinicaltrials.gov/ct2/show/record/NCT03017898> [Accessed 11 August 2020].
- 349 Clinicaltrials.gov. a Study to Investigate the Efficacy- and Safety of the Colovac Colorectal Anastomosis Protection Device. (SAFE-1). Trial ID: NCT03352570. 2017. Status: Completed. Available from: <https://clinicaltrials.gov/ct2/show/record/NCT03352570> [Accessed 11 August 2020].
- 350 Clinicaltrials.gov. Laser Interstitial Thermotherapy (LITT) Combined With Checkpoint Inhibitor for Recurrent GBM (RGBM). Trial ID: NCT03277638. 2017. Status: Recruiting. Available from: <https://clinicaltrials.gov/ct2/show/record/NCT03277638> [Accessed 11 August 2020].
- 351 Clinicaltrials.gov. HIIH Versus HMC: Randomized Clinical Trial (HIIxHMC). Trial ID: NCT03293056. 2017. Status: Recruiting. Available from: <https://clinicaltrials.gov/ct2/show/record/NCT03293056> [Accessed 11 August 2020].
- 352 Clinicaltrials.gov. Efficacy of B7A BSIGG Against E. Coli Strain B7A Challenge. Trial ID: NCT03040687. 2017. Status: Completed. Available from: <https://clinicaltrials.gov/ct2/show/record/NCT03040687> [Accessed 11 August 2020].
- 353 Clinicaltrials.gov. Multicenter Prospective Trial on Hemorrhoids. Trial ID: NCT03245086. 2017. Status: Other. Available from: <https://clinicaltrials.gov/ct2/show/record/NCT03245086> [Accessed 11 August 2020].
- 354 Clinicaltrials.gov. Korean Cancer Study Group: Translational biomarker Driven Umbrella Project for Head and Neck (TRIUMPH)- Esophageal Squamous Cell Carcinoma- Part 1 (HNSCC)]. Trial ID: NCT03292250. 2017. Status: Recruiting. Available from: <https://clinicaltrials.gov/ct2/show/record/NCT03292250> [Accessed 11 August 2020].
- 355 Clinicaltrials.gov. Velphoro and Impact on the Oral Cavity and Gut Microbiome (MicrobiomEisen). Trial ID: NCT03409757. 2017. Status: Recruiting. Available from: <https://clinicaltrials.gov/ct2/show/record/NCT03409757> [Accessed 11 August 2020].

- 356 Clinicaltrials.gov. Autonomic and Cytokines Profiles of Patients With Ulcerative Proctitis. Trial ID: NCT03259659. 2017. Status: Recruiting. Available from: <https://clinicaltrials.gov/ct2/show/record/NCT03259659> [Accessed 11 August 2020].
- 357 Clinicaltrials.gov. Intestinal Mesenchymal Stem Stells and Inflammatory Bowel Diseases (COSMIC). Trial ID: NCT03115749. 2017. Status: Not Yet Recruiting. Available from: <https://clinicaltrials.gov/ct2/show/record/NCT03115749> [Accessed 11 August 2020].
- 358 Clinicaltrials.gov. Behavioural Treatment for Functional Bowel Symptoms in Inflammatory Bowel Disease (LIBERATE). Trial ID: NCT03177044. 2017. Status: Active- Not Recruiting. Available from: <https://clinicaltrials.gov/ct2/show/record/NCT03177044> [Accessed 11 August 2020].
- 359 Clinicaltrials.gov. The FAIS-Trial: Faecal Microbiota Transplantation (FMT) in Adolescents With Refractory Irritable Bowel Syndrome (IBS) (FAIS). Trial ID: NCT03074227. 2017. Status: Recruiting. Available from: <https://clinicaltrials.gov/ct2/show/record/NCT03074227> [Accessed 11 August 2020].
- 360 Clinicaltrials.gov. Study to Explore the Therapeutic Effect of Eluxadoline in Treating Irritable Bowel Syndrome With Diarrhea in Children. Trial ID: NCT03339128. 2017. Status: Recruiting. Available from: <https://clinicaltrials.gov/ct2/show/record/NCT03339128> [Accessed 11 August 2020].
- 361 Clinicaltrials.gov. Comparing Two Types of Diets on Psychological and Gastrointestinal Symptoms. Trial ID: NCT03035799. 2017. Status: Recruiting. Available from: <https://clinicaltrials.gov/ct2/show/record/NCT03035799> [Accessed 11 August 2020].
- 362 Clinicaltrials.gov. Diet Reintroduction Study in Irritable Bowel Syndrome. Trial ID: NCT03052439. 2017. Status: Recruiting. Available from: <https://clinicaltrials.gov/ct2/show/record/NCT03052439> [Accessed 11 August 2020].
- 363 Clinicaltrials.gov. Efficacy of Low-FODMAPs Dietary Therapy for Irritable Bowel Syndrome in China. Trial ID: NCT03304041. 2017. Status: Completed. Available from: <https://clinicaltrials.gov/ct2/show/record/NCT03304041> [Accessed 11 August 2020].
- 364 Clinicaltrials.gov. The Multi-disciplinary Treatment of Functional Gut Disorders Study (MANTRA). Trial ID: NCT03078634. 2017. Status: Active- Not Recruiting. Available from: <https://clinicaltrials.gov/ct2/show/record/NCT03078634> [Accessed 11 August 2020].
- 365 Clinicaltrials.gov. Impact of Lower Urinary Tract Dysfunction on Clinical Manifestation in Patients With Stroke. Trial ID: NCT03174600. 2017. Status: Completed. Available from: <https://clinicaltrials.gov/ct2/show/record/NCT03174600> [Accessed 11 August 2020].
- 366 Clinicaltrials.gov. Induction of Labour for LGA fetus in Women Without Insulin-treated Diabetes. Trial ID: NCT03355040. 2017. Status: Completed. Available from: <https://clinicaltrials.gov/ct2/show/record/NCT03355040> [Accessed 11 August 2020].
- 367 Clinicaltrials.gov. INCB039110 in Combination With Dabrafenib and Trametinib in Patients With BRAF-mutant Melanoma and Other Solid Tumors. Trial ID: NCT03272464. 2017. Status: Recruiting. Available from: <https://clinicaltrials.gov/ct2/show/record/NCT03272464> [Accessed 11 August 2020].
- 368 Clinicaltrials.gov. Effectiveness of Assessment and Educational Intervention on Motor Control of the Pelvic Floor Muscle in Women (MENO\_edu). Trial ID: NCT03220672. 2017. Status: Completed. Available from: <https://clinicaltrials.gov/ct2/show/record/NCT03220672> [Accessed 11 August 2020].
- 369 Clinicaltrials.gov. Amino Acid Metabolism in Fed Surgical Critically Ill Patients. Trial ID: NCT03451968. 2017. Status: Active- Not Recruiting. Available from: <https://clinicaltrials.gov/ct2/show/record/NCT03451968> [Accessed 11 August 2020].
- 370 Clinicaltrials.gov. EndoTAG-1 Plus Gemcitabine Versus Gemcitabine Alone in Patients With Measurable Locally Advanced and/or Metastatic Adenocarcinoma of the Pancreas Failed on FOLFIRINOX Treatment. Trial ID: NCT03126435. 2017. Status: Recruiting. Available from: <https://clinicaltrials.gov/ct2/show/record/NCT03126435> [Accessed 11 August 2020].
- 371 Clinicaltrials.gov. A Health Service Research Study to Investigate Survival of Metastatic Pancreatic Cancer Patients After Sequential Chemotherapy (PANTHEON). Trial ID: NCT03331640. 2017. Status: Recruiting. Available from: <https://clinicaltrials.gov/ct2/show/record/NCT03331640> [Accessed 11 August 2020].
- 372 Clinicaltrials.gov. A Study of Dabrafenib and/or Trametinib in Patients With Relapsed and/or Refractory Multiple Myeloma. Trial ID: NCT03091257. 2017. Status: Recruiting. Available from: <https://clinicaltrials.gov/ct2/show/record/NCT03091257> [Accessed 11 August 2020].
- 373 Clinicaltrials.gov. Physiological Effects of N-Acetyl Cysteine in Patients With Multiple Sclerosis (MSNAC). Trial ID: NCT03032601. 2017. Status: Active- Not Recruiting. Available from: <https://clinicaltrials.gov/ct2/show/record/NCT03032601> [Accessed 11 August 2020].

- 374 Clinicaltrials.gov. Medication Usage and Patient Reported Outcomes Evaluation Via myBETAapp in Patients With Multiple Sclerosis Treated With Betaferon: a Pilot Study (PROmyBETAapp). Trial ID: NCT03134573. 2017. Status: Completed. Available from: <https://clinicaltrials.gov/ct2/show/record/NCT03134573> [Accessed 11 August 2020].
- 375 Clinicaltrials.gov. Stretching Isquiotibials in Water and on Land in Healthy Adults (Flexibility). Trial ID: NCT03350880. 2017. Status: Completed. Available from: <https://clinicaltrials.gov/ct2/show/record/NCT03350880> [Accessed 11 August 2020].
- 376 Clinicaltrials.gov. Intermittent Dosing Of Selumetinib In Childhood NF1 Associated Tumours (INSPECT). Trial ID: NCT03326388. 2017. Status: Recruiting. Available from: <https://clinicaltrials.gov/ct2/show/record/NCT03326388> [Accessed 11 August 2020].
- 377 Clinicaltrials.gov. The Effect of Prebiotic Fibres on Weight Loss in an Overweight and Obese Population (MNGII). Trial ID: NCT03135041. 2017. Status: Completed. Available from: <https://clinicaltrials.gov/ct2/show/record/NCT03135041> [Accessed 11 August 2020].
- 378 Clinicaltrials.gov. Metastatic Tumor Cell Trap Device in Patients With Advanced Ovarian Cancer. Trial ID: NCT03085238. 2017. Status: Completed. Available from: <https://clinicaltrials.gov/ct2/show/record/NCT03085238> [Accessed 11 August 2020].
- 379 Clinicaltrials.gov. Evaluation of Preoperative N1539 in Colorectal Surgery. Trial ID: NCT03323385. 2017. Status: Completed. Available from: <https://clinicaltrials.gov/ct2/show/record/NCT03323385> [Accessed 11 August 2020].
- 380 Clinicaltrials.gov. Probiotic Modulation of Intestinal Microbiota in Long-term Intake of Proton Pump Inhibitors. Trial ID: NCT03220802. 2017. Status: Active- Not Recruiting. Available from: <https://clinicaltrials.gov/ct2/show/record/NCT03220802> [Accessed 11 August 2020].
- 381 Clinicaltrials.gov. Dietary Intervention With Brain-friendly Diet (BRAVE). Trial ID: NCT03346486. 2017. Status: Completed. Available from: <https://clinicaltrials.gov/ct2/show/record/NCT03346486> [Accessed 11 August 2020].
- 382 Clinicaltrials.gov. PDIUC Protocol for Placental Accreta (PDIUC). Trial ID: NCT03273569. 2017. Status: Other. Available from: <https://clinicaltrials.gov/ct2/show/record/NCT03273569> [Accessed 11 August 2020].
- 383 Clinicaltrials.gov. Deprescribing of Symptomatic Medications in Rehabilitative or Subacute Care Patients. Trial ID: NCT03354845. 2017. Status: Other. Available from: <https://clinicaltrials.gov/ct2/show/record/NCT03354845> [Accessed 11 August 2020].
- 384 Clinicaltrials.gov. Effect of Resistant Starch on Insulin Sensitivity and Beta Cell Function in Subjects With Prediabetes. Trial ID: NCT03294915. 2017. Status: Not Yet Recruiting. Available from: <https://clinicaltrials.gov/ct2/show/record/NCT03294915> [Accessed 11 August 2020].
- 385 Clinicaltrials.gov. Metabolic Change in Prostate Cancer Bone Metastases on 68Ga-HBED-CC-PSMA PET/CT Following Radium-223 Therapy. Trial ID: NCT03062254. 2017. Status: Active- Not Recruiting. Available from: <https://clinicaltrials.gov/ct2/show/record/NCT03062254> [Accessed 11 August 2020].
- 386 Clinicaltrials.gov. Sexual Health and Rehabilitation eClinic (SHAReClinic). Trial ID: NCT03396848. 2017. Status: Active- Not Recruiting. Available from: <https://clinicaltrials.gov/ct2/show/record/NCT03396848> [Accessed 11 August 2020].
- 387 Clinicaltrials.gov. A Study to Characterize Profile of Participant With Psoriatic Arthritis Depending on Whether Their Disease is Managed by a Dermatologist or by a Rheumatologist- and Starting Ustekinumab (PROUST). Trial ID: NCT03336281. 2017. Status: Active- Not Recruiting. Available from: <https://clinicaltrials.gov/ct2/show/record/NCT03336281> [Accessed 11 August 2020].
- 388 Clinicaltrials.gov. Incontinence and Quality of Life in Children With Spina Bifida. Trial ID: NCT03410667. 2017. Status: Not Yet Recruiting. Available from: <https://clinicaltrials.gov/ct2/show/record/NCT03410667> [Accessed 11 August 2020].
- 389 Clinicaltrials.gov. Enhancing Recovery in Non-Traumatic Spinal Cord Injury. Trial ID: NCT03320759. 2017. Status: Not Yet Recruiting. Available from: <https://clinicaltrials.gov/ct2/show/record/NCT03320759> [Accessed 11 August 2020].
- 390 Clinicaltrials.gov. A Study in Participants With a Newly Confirmed Diagnosis of Spondyloarthritis (SpA) Who Are New to Conventional- Targeted and Biological DMARDs (SIRENA). Trial ID: NCT03131661. 2017. Status: Active- Not Recruiting. Available from: <https://clinicaltrials.gov/ct2/show/record/NCT03131661> [Accessed 11 August 2020].
- 391 Clinicaltrials.gov. Electroacupuncture for Poststroke Patients With Shoulder Pain (EAPSSP). Trial ID: NCT03086863. 2017. Status: Completed. Available from: <https://clinicaltrials.gov/ct2/show/record/NCT03086863> [Accessed 11 August 2020].

- 392 Clinicaltrials.gov. Efficacy and Safety of Nerve Root Axial Decompression Surgery in The Treatment of Tethered Cord Syndrome. Trial ID: NCT03262844. 2017. Status: Recruiting. Available from: <https://clinicaltrials.gov/ct2/show/record/NCT03262844> [Accessed 11 August 2020].
- 393 Clinicaltrials.gov. Stem Cell Spinal Cord Injury Exoskeleton and Virtual Reality Treatment Study (SciExVR). Trial ID: NCT03225625. 2017. Status: Recruiting. Available from: <https://clinicaltrials.gov/ct2/show/record/NCT03225625> [Accessed 11 August 2020].
- 394 Clinicaltrials.gov. Efficacy and Safety of Sotagliflozin Versus Placebo in Subjects With Type 2 Diabetes Mellitus Who Have Inadequate Glycemic Control While Taking Insulin Alone or With Other Oral Antidiabetic Agents (SOTA-INS). Trial ID: NCT03285594. 2017. Status: Completed. Available from: <https://clinicaltrials.gov/ct2/show/record/NCT03285594> [Accessed 11 August 2020].
- 395 Clinicaltrials.gov. Efficacy and Safety of Sotagliflozin Versus Glimepiride and Placebo in Subjects With Type 2 Diabetes Mellitus That Are Taking Metformin Monotherapy (SOTA-GLIM). Trial ID: NCT03332771. 2017. Status: Completed. Available from: <https://clinicaltrials.gov/ct2/show/record/NCT03332771> [Accessed 11 August 2020].
- 396 Clinicaltrials.gov. The Effect of Diet on Disease Activity and Symptoms in Patients With Ulcerative Colitis. Trial ID: NCT03053713. 2017. Status: Invitation. Available from: <https://clinicaltrials.gov/ct2/show/record/NCT03053713> [Accessed 11 August 2020].
- 397 Clinicaltrials.gov. The Efficacy of Cobitolimod in Patients With Moderate to Severe Active Ulcerative Colitis (CONDUCT). Trial ID: NCT03178669. 2017. Status: Active- Not Recruiting. Available from: <https://clinicaltrials.gov/ct2/show/record/NCT03178669> [Accessed 11 August 2020].
- 398 Clinicaltrials.gov. Efficacy and Safety Study of SHP647 as Induction Therapy in Participants With Moderate to Severe Ulcerative Colitis (FIGARO UC 302). Trial ID: NCT03259308. 2017. Status: Recruiting. Available from: <https://clinicaltrials.gov/ct2/show/record/NCT03259308> [Accessed 11 August 2020].
- 399 Clinicaltrials.gov. Efficacy and Safety Study of SHP647 as Induction Therapy in Participants With Moderate to Severe Ulcerative Colitis (FIGARO UC 301). Trial ID: NCT03259334. 2017. Status: Recruiting. Available from: <https://clinicaltrials.gov/ct2/show/record/NCT03259334> [Accessed 11 August 2020].
- 400 Clinicaltrials.gov. An Efficacy and Safety Study of Ontamalimab as Maintenance Therapy in Participants With Moderate to Severe Ulcerative Colitis (FIGARO UC 303). Trial ID: NCT03290781. 2017. Status: Recruiting. Available from: <https://clinicaltrials.gov/ct2/show/record/NCT03290781> [Accessed 11 August 2020].
- 401 Clinicaltrials.gov. Phase 2 Dose-finding IMU-838 for Ulcerative Colitis (CALDOSE-1). Trial ID: NCT03341962. 2017. Status: Recruiting. Available from: <https://clinicaltrials.gov/ct2/show/record/NCT03341962> [Accessed 11 August 2020].
- 402 Clinicaltrials.gov. Trial to Compare Urinary Continence Recovery After Robotic Radical Prostatectomy With or Without Rhabdosphincter Reconstruction. (RHABDO-PROST). Trial ID: NCT03302169. 2017. Status: Other. Available from: <https://clinicaltrials.gov/ct2/show/record/NCT03302169> [Accessed 11 August 2020].
- 403 Clinicaltrials.gov. ADAPT-BLADDER: Modern Immunotherapy in BCG-Relapsing Urothelial Carcinoma of the Bladder. Trial ID: NCT03317158. 2017. Status: Recruiting. Available from: <https://clinicaltrials.gov/ct2/show/record/NCT03317158> [Accessed 11 August 2020].
- 404 Clinicaltrials.gov. Rifaximin on Visceral Hypersensitivity. Trial ID: NCT03462966. 2017. Status: Recruiting. Available from: <https://clinicaltrials.gov/ct2/show/record/NCT03462966> [Accessed 11 August 2020].
- 405 Clinicaltrials.gov. A Study Comparing BGB-3111 and Ibrutinib in Participants With Waldenström's Macroglobulinemia (WM) (ASPEN). Trial ID: NCT03053440. 2017. Status: Active- Not Recruiting. Available from: <https://clinicaltrials.gov/ct2/show/record/NCT03053440> [Accessed 11 August 2020].
- 406 Clinicaltrials.gov. BLB Study Back or Leg Pain and Bladder Symptoms Study (BLB). Trial ID: NCT03325374. 2017. Status: Active- Not Recruiting. Available from: <https://clinicaltrials.gov/ct2/show/record/NCT03325374> [Accessed 11 August 2020].
- 407 Clinicaltrials.gov. Tridimensional Pelvic Floor Ultrasound and Quality of Life Scores Questionnaires in Nulliparous or Parous Women. Trial ID: NCT03656601. 2017. Status: Active- Not Recruiting. Available from: <https://clinicaltrials.gov/ct2/show/record/NCT03656601> [Accessed 11 August 2020].
- 408 Clinicaltrials.gov. Urinary and Anal Incontinence in Tunisian Women. Trial ID: NCT03386292. 2017. Status: Completed. Available from: <https://clinicaltrials.gov/ct2/show/record/NCT03386292> [Accessed 11 August 2020].
- 409 Clinicaltrials.gov. Determining Early Development of Faecal Incontinence and Anorectal Muscle Function After Surgery for Rectal Cancer. (EDFI-Cohort). Trial ID: NCT03257332. 2017. Status: Invitation. Available from: <https://clinicaltrials.gov/ct2/show/record/NCT03257332> [Accessed 11 August 2020].

- 410 Clinicaltrials.gov. Laparoscopic Lateral Mesh Suspension for Pelvic Organ Prolapse. Trial ID: NCT03387202. 2017. Status: Completed. Available from: <https://clinicaltrials.gov/ct2/show/record/NCT03387202> [Accessed 11 August 2020].
- 411 Clinicaltrials.gov. POPQ Versus Simulated Apical Support as a Guideline for Anterior or Posterior Repair During Vaginal Reconstruction. Trial ID: NCT03187054. 2017. Status: Recruiting. Available from: <https://clinicaltrials.gov/ct2/show/record/NCT03187054> [Accessed 11 August 2020].
- 412 EU Clinical Trials Register. TALAPRO 1: A PHASE 2- OPEN LABEL- RESPONSE RATE STUDY OF TALAZOPARIB IN MEN WITH DNA REPAIR DEFECTS AND METASTATIC CASTRATION RESISTANT PROSTATE CANCER WHO PREVIOUSLY RECEIVED TAXANE BASED CHEMOTHERAPY AND PROGRESSED ON AT LEAST 1 NOVEL HORMONAL AGENT (ENZALUTAMIDE AND/OR ABIRATERONE ACETATE/PREDNISONE). Trial ID: 2016-002036-32/GB. 2017. Status: Completed. Available from: <https://www.clinicaltrialsregister.eu/ctr-search/trial/2016-002036-32/GB> [Accessed 11 August 2020].
- 413 EU Clinical Trials Register. Characterization of colonic motility patterns in different functional bowel disorders compared to health and their role in moving content Karakteriseren van colon motor patronen in verschillende functionele darmziekten in vergelijking met gezonden en hun rol in het voortbewegen van inhoud. Trial ID: 2017-002679-25/BE. 2017. Status: Ongoing. Available from: <https://www.clinicaltrialsregister.eu/ctr-search/trial/2017-002679-25/BE> [Accessed 11 August 2020].
- 414 EU Clinical Trials Register. Efficacy- safety and tolerability of a bowel cleansing preparation (Eziclen/Izinova ) in paediatric subjects undergoing colonoscopy: a Phase III- multicentre- randomised- comparative study versus Klean-Prep (PEG-Electrolytes)- administered on the day before colonoscopy- investigator-blinded- non-inferiority in adolescents of 12 to 17 years of age (inclusive) > 40 kg. Multicentrick - randomizovan - ste n zaslepen - non-inferioritn klinick hodnocen srovn vaj c innost- bezpe nost a sn enlivost p pravku na i t n st ev Eziclen /Izinova u pediatrick populace s p pravkem Klen-Prep (PEG-Elektrolyty) podan ch jeden den p ed kolonoskopi - u adolescentn ch pacient ve v ku 12 17 let (v etn ) > 40 kg.; EASYKID. Trial ID: 2016-002265-60/CZ. 2017. Status: Ongoing. Available from: <https://www.clinicaltrialsregister.eu/ctr-search/trial/2016-002265-60/CZ> [Accessed 11 August 2020].
- 415 EU Clinical Trials Register. A Phase 3- Randomized- Double-Blind- Double-Dummy- Multicenter- Prospective Study to Assess the Efficacy and Safety of IV Eravacycline Compared with Ertapenem in Complicated Urinary Tract Infections 3- - - -; IGNITE 3. Trial ID: 2016-002207-26/BG. 2017. Status: Completed. Available from: <https://www.clinicaltrialsregister.eu/ctr-search/trial/2016-002207-26/BG> [Accessed 11 August 2020].
- 416 EU Clinical Trials Register. Randomized- Double-Blind- Multi-Center Study of Cefepime/AAI101 in Hospitalized Adults With Complicated Urinary Tract Infections- Including Acute Pyelonephritis. Trial ID: 2016-005161-31/HU. 2017. Status: Completed. Available from: <https://www.clinicaltrialsregister.eu/ctr-search/trial/2016-005161-31/HU> [Accessed 11 August 2020].
- 417 EU Clinical Trials Register. A PHASE 1/2- OPEN-LABEL- MULTICENTER STUDY TO INVESTIGATE THE SAFETY- PHARMACOKINETICS- AND EFFICACY OF TAS0728- AN ORAL COVALENT BINDING INHIBITOR OF HER2- IN SUBJECTS WITH ADVANCED SOLID TUMORS WITH HER2 OR HER3 ABNORMALITIES. Trial ID: 2017-004415-39/GB. 2017. Status: Ongoing. Available from: <https://www.clinicaltrialsregister.eu/ctr-search/trial/2017-004415-39/GB> [Accessed 11 August 2020].
- 418 EU Clinical Trials Register. TRreatment of Irritable bowel syndrome using Titrated ONdansetron Trial; TRITON Trial v1.0. Trial ID: 2017-000533-31/GB. 2017. Status: Ongoing. Available from: <https://www.clinicaltrialsregister.eu/ctr-search/trial/2017-000533-31/GB> [Accessed 11 August 2020].
- 419 EU Clinical Trials Register. Phase III CLINICAL TRIAL- MULCHNTRIC- RANDOMIZED- BLIND DOUBLE IN TWO PARALLEL GROUPS TO COMPARE THE EFFECTIVENESS AND SAFETY OF THE SIMPLE CLOSURE OF THE CRYPTOGLANDULAR ANAL FISTULA WITH OR WITHOUT THE ADJUVANT ADMINISTRATION OF PLASMA RICO IN GROWTH FACTORS (ENDORET / PRGF TECHNOLOGY)- IN A PERIOD OF 48 WEEKS ENSAYO CL NICO FASE III- MULC NTRICO- ALEATORIZADO- DOBLE CIEGO EN DOS GRUPOS PARALELOS PARA COMPARAR LA EFICACIA Y SEGURIDAD DEL CIERRE SIMPLE DE LA F STULA ANAL CRIPTOGLANDULAR CON O SIN LA ADMINISTRACI N ADYUVANTE DE PLASMA RICO EN FACTORES DE CRECIMIENTO (TECNOLOG A ENDORET /PRGF )- EN UN PERIODO DE 48 SEMANAS; PRGF IN ACF PRGF EN FAC. Trial ID: 2017-001209-34/ES. 2017. Status: Ongoing. Available from: <https://www.clinicaltrialsregister.eu/ctr-search/trial/2017-001209-34/ES> [Accessed 11 August 2020].
- 420 EU Clinical Trials Register. A Phase 3 Long-term Safety Extension Study of SHP647 in Subjects with Moderate to Severe Ulcerative Colitis or Crohn's Disease (AIDA); AIDA. Trial ID: 2017-000574-11/NL. 2017. Status: Ongoing.



- Available from: <https://www.clinicaltrialsregister.eu/ctr-search/trial/2017-000574-11/NL> [Accessed 11 August 2020].
- 421 ISRCTN Registry. MRI for early response prediction to anti-TNF therapy. Trial ID: ISRCTN14481560. 2017. Status: Recruiting. Available from: <http://www.isrctn.com/ISRCTN14481560> [Accessed 11 August 2020].
- 422 ISRCTN Registry. Pancreatic replacement therapy and glycaemic control in diabetes. Trial ID: ISRCTN14889127. 2017. Status: Completed. Available from: <http://www.isrctn.com/ISRCTN14889127> [Accessed 11 August 2020].
- 423 ISRCTN Registry. Probiotics for infant colic. Trial ID: ISRCTN13340073. 2017. Status: Completed. Available from: <http://www.isrctn.com/ISRCTN13340073> [Accessed 11 August 2020].
- 424 ISRCTN Registry. Treatment of Irritable bowel syndrome with diarrhoea using titrated ondansetron. Trial ID: ISRCTN17508514. 2017. Status: Recruiting. Available from: <http://www.isrctn.com/ISRCTN17508514> [Accessed 11 August 2020].
- 425 ISRCTN Registry. Enterogel in the treatment of Irritable Bowel Syndrome with Diarrhoea. Trial ID: ISRCTN17149988. 2017. Status: Recruiting. Available from: <http://www.isrctn.com/ISRCTN17149988> [Accessed 11 August 2020].
- 426 ISRCTN Registry. GP reminders for bowel scope screening non-participants. Trial ID: ISRCTN82867861. 2017. Status: Ongoing. Available from: <http://www.isrctn.com/ISRCTN82867861> [Accessed 11 August 2020].
- 427 ISRCTN Registry. A randomised controlled trial to assess the safety and effectiveness of stem cell transplantation using a reduced intensity regimen in patients with treatment resistant Crohn's disease. Trial ID: ISRCTN17160440. 2017. Status: Recruiting. Available from: <http://www.isrctn.com/ISRCTN17160440> [Accessed 11 August 2020].
- 428 ISRCTN Registry. Effects of vitamin D supplementation in type 1 diabetes mellitus patients. Trial ID: ISRCTN32601947. 2017. Status: Completed. Available from: <http://www.isrctn.com/ISRCTN32601947> [Accessed 11 August 2020].
- 429 ISRCTN Registry. Improving Parkinson's related overactive bladder. Trial ID: ISRCTN13217913. 2017. Status: Completed. Available from: <http://www.isrctn.com/ISRCTN13217913> [Accessed 11 August 2020].
- 430 Sri Lanka Clinical Trials Registry. Tranexamic acid with norethisterone versus tranexamic acid alone in treatment of vaginal bleeding during dengue infection. Trial ID: SLCTR/2017/037. 2017. Status: Not Yet Recruiting. Available from: <http://slctr.lk/trials/slctr-2017-037.html> [Accessed 11 August 2020].
- 431 UMIN Clinical Trials Registry (UMIN-CTR). COBRA Trial. Trial ID: UMIN000026158. 2017. Status: Recruiting. Available from: [https://upload.umin.ac.jp/cgi-open-bin/ctr\\_e/ctr\\_view.cgi?recptno=R000029703](https://upload.umin.ac.jp/cgi-open-bin/ctr_e/ctr_view.cgi?recptno=R000029703) [Accessed 11 August 2020].
- 432 UMIN Clinical Trials Registry (UMIN-CTR). A randomized controlled trial of the cognitive behavioral therapy for irritable bowel syndrome. Trial ID: UMIN000030620. 2017. Status: Not Yet Recruiting. Available from: [https://upload.umin.ac.jp/cgi-open-bin/ctr\\_e/ctr\\_view.cgi?recptno=R000034965](https://upload.umin.ac.jp/cgi-open-bin/ctr_e/ctr_view.cgi?recptno=R000034965) [Accessed 11 August 2020].
- 433 Australian New Zealand Clinical Trials Registry (ANZCTR). A trial to increase participation in the National Bowel Cancer Screening Program by eligible Indigenous clients of participating primary health care centres that receive either an intensive model of support or a low intensity model of support in offering screening. Trial ID: ACTRN12618001555246. 2018. Status: Not Yet Recruiting. Available from: <https://www.anzctr.org.au/Trial/Registration/TrialReview.aspx?id=375936&isReview=true> [Accessed 11 August 2020].
- 434 Australian New Zealand Clinical Trials Registry (ANZCTR). The Sydney 1000 Bowel Cancer Study and Biobank: a 10 year observational study following the treatment pathways and outcomes of 1000 patients recently diagnosed with colorectal cancer (CRC). Trial ID: ACTRN12618000054213. 2018. Status: Recruiting. Available from: <https://www.anzctr.org.au/Trial/Registration/TrialReview.aspx?id=373540&isReview=true> [Accessed 11 August 2020].
- 435 Australian New Zealand Clinical Trials Registry (ANZCTR). Improving the response to high intensity interval training through the ingestion of a daily prebiotic fibre. Trial ID: ACTRN12618000501246p. 2018. Status: Not Yet Recruiting. Available from: <https://www.anzctr.org.au/Trial/Registration/TrialReview.aspx?id=374601&isReview=true> [Accessed 11 August 2020].
- 436 Australian New Zealand Clinical Trials Registry (ANZCTR). Impact of knowledge of vascular disease on Modification Of Diet- Exercise and Lifestyle: The MODEL study. Trial ID: ACTRN12618001087246. 2018. Status: Recruiting. Available from: <https://www.anzctr.org.au/Trial/Registration/TrialReview.aspx?id=375371&isReview=true> [Accessed 11 August 2020].



- 437 Australian New Zealand Clinical Trials Registry (ANZCTR). Does metronidazole improve symptoms of irritable bowel syndrome in cases of colonic spirochaetosis? Trial ID: ACTRN12618001020279p. 2018. Status: Not Yet Recruiting. Available from: <https://www.anzctr.org.au/Trial/Registration/TrialReview.aspx?id=375280&isReview=true> [Accessed 11 August 2020].
- 438 Australian New Zealand Clinical Trials Registry (ANZCTR). Bowel Preparation Assessment Using Ultrasound Examination II. Trial ID: ACTRN12618000617268p. 2018. Status: Not Yet Recruiting. Available from: <https://www.anzctr.org.au/Trial/Registration/TrialReview.aspx?id=374670&isReview=true> [Accessed 11 August 2020].
- 439 Australian New Zealand Clinical Trials Registry (ANZCTR). Digestive health effects of high amylose wheat in healthy Australian men and women. Trial ID: ACTRN12618001060235. 2018. Status: Not Yet Recruiting. Available from: <https://www.anzctr.org.au/Trial/Registration/TrialReview.aspx?id=375356&isReview=true> [Accessed 11 August 2020].
- 440 Australian New Zealand Clinical Trials Registry (ANZCTR). eADVICE (electronic Advice and Diagnosis Via the Internet following Computerised Evaluation)- an interactive eHealth program addressing paediatric urinary incontinence for reducing waiting times in paediatric urinary incontinence outpatient clinics. Trial ID: ACTRN12618001484235p. 2018. Status: Not Yet Recruiting. Available from: <https://www.anzctr.org.au/Trial/Registration/TrialReview.aspx?id=375172&isReview=true> [Accessed 11 August 2020].
- 441 Australian New Zealand Clinical Trials Registry (ANZCTR). Efficacy of Inferrin<sup>TM</sup> and lactoferrin on symptoms of Irritable Bowel Syndrome. A randomized double-blind placebo-controlled study. Trial ID: ACTRN12618001447246. 2018. Status: Not Yet Recruiting. Available from: <https://www.anzctr.org.au/Trial/Registration/TrialReview.aspx?id=375498&isReview=true> [Accessed 11 August 2020].
- 442 Australian New Zealand Clinical Trials Registry (ANZCTR). The Impact of SunGold kiwifruit on immune status and inflammatory response. Trial ID: ACTRN12618000340235p. 2018. Status: Not Yet Recruiting. Available from: <https://www.anzctr.org.au/Trial/Registration/TrialReview.aspx?id=374598&isReview=true> [Accessed 11 August 2020].
- 443 Australian New Zealand Clinical Trials Registry (ANZCTR). The effect of fruit anthocyanins in participants attending a cognitive rehabilitation group for mild cognitive impairment: A randomised controlled trial. Trial ID: ACTRN12618001184268. 2018. Status: Recruiting. Available from: <https://www.anzctr.org.au/Trial/Registration/TrialReview.aspx?id=375416&isReview=true> [Accessed 11 August 2020].
- 444 Australian New Zealand Clinical Trials Registry (ANZCTR). A Phase 2 placebo controlled- double-blind randomised clinical trial assessing the efficacy of a Herbal supplement for Nocturnal Enuresis in Children. Trial ID: ACTRN12618000288224. 2018. Status: Recruiting. Available from: <https://www.anzctr.org.au/Trial/Registration/TrialReview.aspx?id=374160&isReview=true> [Accessed 11 August 2020].
- 445 Australian New Zealand Clinical Trials Registry (ANZCTR). Testing two interventions to reduce the time needed to recover after surgery for ovarian cancer. Trial ID: ACTRN12618002029279. 2018. Status: Recruiting. Available from: <https://www.anzctr.org.au/Trial/Registration/TrialReview.aspx?id=376419&isReview=true> [Accessed 11 August 2020].
- 446 Australian New Zealand Clinical Trials Registry (ANZCTR). Does resistant starch reduce diarrhoea and improve nutrition and quality of life in people with short bowel syndrome. Trial ID: ACTRN12618000312246p. 2018. Status: Not Yet Recruiting. Available from: <https://www.anzctr.org.au/Trial/Registration/TrialReview.aspx?id=374464&isReview=true> [Accessed 11 August 2020].
- 447 Australian New Zealand Clinical Trials Registry (ANZCTR). Polyvinyl chloride ring pessary versus silicon irregular hexagon pessary for pelvic organ prolapse: a randomised trial comparing treatment success. Trial ID: ACTRN12618000416291. 2018. Status: Recruiting. Available from: <https://www.anzctr.org.au/Trial/Registration/TrialReview.aspx?id=370885&isReview=true> [Accessed 11 August 2020].
- 448 Clinical Research Information Service (CRIS). The effect of enhanced education for bowel preparation using a combination of educational video and telephone based re-education: Prospective- colonoscopist-blinded-

- randomized controlled study. Trial ID: KCT0003184. 2018. Status: Completed. Available from: [https://cris.nih.gov/cris/en/search/search\\_result\\_st01.jsp?seq=16217](https://cris.nih.gov/cris/en/search/search_result_st01.jsp?seq=16217) [Accessed 11 August 2020].
- 449 Clinical Research Information Service (CRIS). The Effect of Recovery Enhancement Program for Patients with Rectal Cancer Surgery. Trial ID: KCT0003505. 2018. Status: Recruiting. Available from: [https://cris.nih.gov/cris/en/search/search\\_result\\_st01.jsp?seq=13708](https://cris.nih.gov/cris/en/search/search_result_st01.jsp?seq=13708) [Accessed 11 August 2020].
- 450 Clinical Trials Registry - India (CTRI). Role of chewing gum in return of gut motility after surgery. Trial ID: CTRI/2018/11/016427. 2018. Status: Not Available. Available from: <http://ctri.nic.in/Clinicaltrials/pmaindet2.php?trialid=29068> [Accessed 11 August 2020].
- 451 Clinical Trials Registry - India (CTRI). Role of negative pressure dressing in bowel perforation wounds A randomized control study. Trial ID: CTRI/2018/08/015489. 2018. Status: Not Available. Available from: <http://ctri.nic.in/Clinicaltrials/pmaindet2.php?trialid=27735> [Accessed 11 August 2020].
- 452 Clinical Trials Registry - India (CTRI). A comparative study of fistulectomy versus fistulotomy with marsupialization in patients of simple anal fistula. Trial ID: CTRI/2018/03/012363. 2018. Status: Not Available. Available from: <http://ctri.nic.in/Clinicaltrials/pmaindet2.php?trialid=21817> [Accessed 11 August 2020].
- 453 Clinical Trials Registry - India (CTRI). A clinical study to study the effect of a herbal formulation in patients with diarrhoea in comparison with oral rehydration therapy. Trial ID: CTRI/2018/03/012699. 2018. Status: Not Available. Available from: <http://ctri.nic.in/Clinicaltrials/pmaindet2.php?trialid=24014> [Accessed 11 August 2020].
- 454 Clinical Trials Registry - India (CTRI). A Comparison of siddha literature vasana vatham with modern literature. Trial ID: CTRI/2018/04/012934. 2018. Status: Not Available. Available from: <http://ctri.nic.in/Clinicaltrials/pmaindet2.php?trialid=24038> [Accessed 11 August 2020].
- 455 Clinicaltrials.gov. ID-JPL934 for Abnormal Bowel Movement. Trial ID: NCT03395626. 2018. Status: Other. Available from: <https://clinicaltrials.gov/ct2/show/record/NCT03395626> [Accessed 11 August 2020].
- 456 Clinicaltrials.gov. Mechanical Bowel Preparation and Oral Antibiotics Before Colon Cancer Surgery (COLONPREP). Trial ID: NCT03475680. 2018. Status: Recruiting. Available from: <https://clinicaltrials.gov/ct2/show/record/NCT03475680> [Accessed 11 August 2020].
- 457 Clinicaltrials.gov. A Study to Evaluate the Efficacy of the Investigational Products on Complete Spontaneous Bowel Movements in Participants Who Normally Have 3 Complete Spontaneous Bowel Movements Per Week But Are Otherwise Healthy. Trial ID: NCT03462199. 2018. Status: Recruiting. Available from: <https://clinicaltrials.gov/ct2/show/record/NCT03462199> [Accessed 11 August 2020].
- 458 Clinicaltrials.gov. One Plus One Equals Two- Will That do? (Oneplus). Trial ID: NCT03770962. 2018. Status: Recruiting. Available from: <https://clinicaltrials.gov/ct2/show/record/NCT03770962> [Accessed 11 August 2020].
- 459 Clinicaltrials.gov. Intersphincteric Resection With or Without Intraoperative Radiation in Rectal Cancer (IDAVON). Trial ID: NCT03393234. 2018. Status: Recruiting. Available from: <https://clinicaltrials.gov/ct2/show/record/NCT03393234> [Accessed 11 August 2020].
- 460 Clinicaltrials.gov. Transanal Versus Laparoscopic Total Mesorectal Excision for Rectal Cancer. (taTME). Trial ID: NCT03413904. 2018. Status: Recruiting. Available from: <https://clinicaltrials.gov/ct2/show/record/NCT03413904> [Accessed 11 August 2020].
- 461 Clinicaltrials.gov. BReak Interval Delayed Surgery for Gastrointestinal Extrapertoneal Rectal Cancer (BRIDGE). Trial ID: NCT03581344. 2018. Status: Not Yet Recruiting. Available from: <https://clinicaltrials.gov/ct2/show/record/NCT03581344> [Accessed 11 August 2020].
- 462 Clinicaltrials.gov. Timing for Rectal Surgery After Chemoradiotherapy (ST812). Trial ID: NCT03607370. 2018. Status: Recruiting. Available from: <https://clinicaltrials.gov/ct2/show/record/NCT03607370> [Accessed 11 August 2020].
- 463 Clinicaltrials.gov. Quality of Life in Patients With Rectal Cancer Receiving Total Mesorectal Excision With or Without Stoma. Trial ID: NCT03487484. 2018. Status: Recruiting. Available from: <https://clinicaltrials.gov/ct2/show/record/NCT03487484> [Accessed 11 August 2020].
- 464 Clinicaltrials.gov. Organ Preservation in Locally Advanced Rectal Cancer by Radiochemotherapy Followed by Consolidation Chemotherapy. (CAO/ARO/AIO-16). Trial ID: NCT03561142. 2018. Status: Recruiting. Available from: <https://clinicaltrials.gov/ct2/show/record/NCT03561142> [Accessed 11 August 2020].
- 465 Clinicaltrials.gov. Mechanical Bowel Preparation and Oral Antibiotics Before Rectal Cancer Surgery (PREPACOL2). Trial ID: NCT03491540. 2018. Status: Recruiting. Available from: <https://clinicaltrials.gov/ct2/show/record/NCT03491540> [Accessed 11 August 2020].

- 466 Clinicaltrials.gov. Evaluation of Pelvic Peritonization in Low Anterior Resection for Rectal Cancer. Trial ID: NCT03699761. 2018. Status: Not Yet Recruiting. Available from: <https://clinicaltrials.gov/ct2/show/record/NCT03699761> [Accessed 11 August 2020].
- 467 Clinicaltrials.gov. Discharge Planning in Emergency Department for Frail Older With AHF. Trial ID: NCT03696875. 2018. Status: Recruiting. Available from: <https://clinicaltrials.gov/ct2/show/record/NCT03696875> [Accessed 11 August 2020].
- 468 Clinicaltrials.gov. The Feasibility of a Dietary Intervention in Children With ADHD. Trial ID: NCT03737877. 2018. Status: Active- Not Recruiting. Available from: <https://clinicaltrials.gov/ct2/show/record/NCT03737877> [Accessed 11 August 2020].
- 469 Clinicaltrials.gov. Dietary Fiber Intake in Alcohol-dependent Patients. Trial ID: NCT03803709. 2018. Status: Recruiting. Available from: <https://clinicaltrials.gov/ct2/show/record/NCT03803709> [Accessed 11 August 2020].
- 470 Clinicaltrials.gov. Impact of Life Events and Psychological Stress in Rheumatoid Arthritis Set-up : Case-control Study Within a Multifactorial and Integrative Psychological Model (Stress-PR). Trial ID: NCT03550833. 2018. Status: Completed. Available from: <https://clinicaltrials.gov/ct2/show/record/NCT03550833> [Accessed 11 August 2020].
- 471 Clinicaltrials.gov. Vaginal Birth After Caesarean Section and Levator Ani Avulsion. Trial ID: NCT03420001. 2018. Status: Recruiting. Available from: <https://clinicaltrials.gov/ct2/show/record/NCT03420001> [Accessed 11 August 2020].
- 472 Clinicaltrials.gov. Avelumab and Radiation in Muscle-Invasive Bladder Cancer. Trial ID: NCT03747419. 2018. Status: Recruiting. Available from: <https://clinicaltrials.gov/ct2/show/record/NCT03747419> [Accessed 11 August 2020].
- 473 Clinicaltrials.gov. Chemoradiotherapy With or Without Atezolizumab in Treating Patients With Localized Muscle Invasive Bladder Cancer. Trial ID: NCT03775265. 2018. Status: Recruiting. Available from: <https://clinicaltrials.gov/ct2/show/record/NCT03775265> [Accessed 11 August 2020].
- 474 Clinicaltrials.gov. PHOENIX DDR/Anti-PD-L1 Trial: A Pre-surgical Window of Opportunity and Post-surgical Adjuvant Biomarker Study of DNA Damage Response Inhibition and/or Anti-PD-L1 Immunotherapy in Patients With Neoadjuvant Chemotherapy Resistant Residual Triple Negative Breast Cancer (PHOENIX). Trial ID: NCT03740893. 2018. Status: Recruiting. Available from: <https://clinicaltrials.gov/ct2/show/record/NCT03740893> [Accessed 11 August 2020].
- 475 Clinicaltrials.gov. Comparing Local Anesthetics for Transversus Abdominis Plane (TAP) Block During Abdominally-based Free Flap for Breast Reconstruction. Trial ID: NCT03700970. 2018. Status: Recruiting. Available from: <https://clinicaltrials.gov/ct2/show/record/NCT03700970> [Accessed 11 August 2020].
- 476 Clinicaltrials.gov. Oxalobacter Formigenes Colonization and Urinary Oxalate Excretion. Trial ID: NCT03752684. 2018. Status: Recruiting. Available from: <https://clinicaltrials.gov/ct2/show/record/NCT03752684> [Accessed 11 August 2020].
- 477 Clinicaltrials.gov. Effect of FODMAP Restriction on Persistent GI-symptoms in Coeliac Patients. Trial ID: NCT03678935. 2018. Status: Active- Not Recruiting. Available from: <https://clinicaltrials.gov/ct2/show/record/NCT03678935> [Accessed 11 August 2020].
- 478 Clinicaltrials.gov. Environment Analysis Inside an Investigational Prescription Bottle. Trial ID: NCT03752411. 2018. Status: Recruiting. Available from: <https://clinicaltrials.gov/ct2/show/record/NCT03752411> [Accessed 11 August 2020].
- 479 Clinicaltrials.gov. Home Neuromodulation of the Neurogenic Bladder in Chronic Spinal Cord Injury With Transcutaneous Tibial Nerve Stimulation (HomeTTNS). Trial ID: NCT03458871. 2018. Status: Completed. Available from: <https://clinicaltrials.gov/ct2/show/record/NCT03458871> [Accessed 11 August 2020].
- 480 Clinicaltrials.gov. Data Collection for Motor Function and Gait Pattern Analysis of Patients With Chronic Stroke. Trial ID: NCT03468166. 2018. Status: Recruiting. Available from: <https://clinicaltrials.gov/ct2/show/record/NCT03468166> [Accessed 11 August 2020].
- 481 Clinicaltrials.gov. Nivolumab and Ipilimumab in Treating Patients With Esophageal and Gastroesophageal Junction Adenocarcinoma Undergoing Surgery. Trial ID: NCT03604991. 2018. Status: Recruiting. Available from: <https://clinicaltrials.gov/ct2/show/record/NCT03604991> [Accessed 11 August 2020].
- 482 Clinicaltrials.gov. A Study to Evaluate Disease Control and Treatment Pattern in Participants With Moderate to Severe Inflammatory Bowel Disease (IBD) in Real Life Practice (INTENT). Trial ID: NCT03532932. 2018. Status: Recruiting. Available from: <https://clinicaltrials.gov/ct2/show/record/NCT03532932> [Accessed 11 August 2020].

- 483 Clinicaltrials.gov. Evaluation of Information on Bowel Preparation for Morning Colonoscopy. Trial ID: NCT03650725. 2018. Status: Recruiting. Available from: <https://clinicaltrials.gov/ct2/show/record/NCT03650725> [Accessed 11 August 2020].
- 484 Clinicaltrials.gov. Anastomotic Leakage and Enhanced Recovery Pathways After Colorectal Surgery (iCral2). Trial ID: NCT03771456. 2018. Status: Recruiting. Available from: <https://clinicaltrials.gov/ct2/show/record/NCT03771456> [Accessed 11 August 2020].
- 485 Clinicaltrials.gov. Study of Cefepime-tazobactam (FEP-TAZ) in Complicated Urinary Tract Infection (cUTI) or Acute Pyelonephritis (AP). Trial ID: NCT03630081. 2018. Status: Not Yet Recruiting. Available from: <https://clinicaltrials.gov/ct2/show/record/NCT03630081> [Accessed 11 August 2020].
- 486 Clinicaltrials.gov. Study to Assess the Efficacy- Safety and Pharmacokinetics of Orally Administered Tebipenem Pivoxil Hydrobromide (SPR994) Compared to Intravenous Ertapenem in Patients With Complicated Urinary Tract Infection (cUTI) or Acute Pyelonephritis (AP) (ADAPT-PO). Trial ID: NCT03788967. 2018. Status: Recruiting. Available from: <https://clinicaltrials.gov/ct2/show/record/NCT03788967> [Accessed 11 August 2020].
- 487 Clinicaltrials.gov. Effect of SB CD on Chylomicron. Trial ID: NCT03496818. 2018. Status: Recruiting. Available from: <https://clinicaltrials.gov/ct2/show/record/NCT03496818> [Accessed 11 August 2020].
- 488 Clinicaltrials.gov. Efficacy and Safety Study of SHP647 as Induction Therapy in Participants With Moderate to Severe Crohn's Disease (CARMEN CD 305) (CARMEN CD 305). Trial ID: NCT03559517. 2018. Status: Recruiting. Available from: <https://clinicaltrials.gov/ct2/show/record/NCT03559517> [Accessed 11 August 2020].
- 489 Clinicaltrials.gov. Efficacy and Safety Study of SHP647 as Induction Therapy in Participants With Moderate to Severe Crohn's Disease (CARMEN CD 306) (CARMEN CD 306). Trial ID: NCT03566823. 2018. Status: Recruiting. Available from: <https://clinicaltrials.gov/ct2/show/record/NCT03566823> [Accessed 11 August 2020].
- 490 Clinicaltrials.gov. Efficacy and Safety Study of SHP647 as Maintenance Treatment in Participants With Moderate to Severe Crohn's Disease (CARMEN CD 307) (CARMEN CD 307). Trial ID: NCT03627091. 2018. Status: Recruiting. Available from: <https://clinicaltrials.gov/ct2/show/record/NCT03627091> [Accessed 11 August 2020].
- 491 Clinicaltrials.gov. A Study Testing How BI 655130 Works in Patients With Fistulizing Crohn's Disease. Trial ID: NCT03752970. 2018. Status: Recruiting. Available from: <https://clinicaltrials.gov/ct2/show/record/NCT03752970> [Accessed 11 August 2020].
- 492 Clinicaltrials.gov. Evaluation of Local Co-administration of Autologous ADIPOSE Derived Stromal Vascular Fraction With Microfat for Refractory Perianal CROHN's Fistulas. (ADICROHN2). Trial ID: NCT04010526. 2018. Status: Not Yet Recruiting. Available from: <https://clinicaltrials.gov/ct2/show/record/NCT04010526> [Accessed 11 August 2020].
- 493 Clinicaltrials.gov. A Study to Evaluate Disease Control- Treatment Patterns- Burden of Disease and Quality of Life in Participants With Moderate to Severe Inflammatory Bowel Disease (IBD) (RISE AR). Trial ID: NCT03488030. 2018. Status: Completed. Available from: <https://clinicaltrials.gov/ct2/show/record/NCT03488030> [Accessed 11 August 2020].
- 494 Clinicaltrials.gov. The Feasibility of Following the Crohn's Diet. Trial ID: NCT03691155. 2018. Status: Completed. Available from: <https://clinicaltrials.gov/ct2/show/record/NCT03691155> [Accessed 11 August 2020].
- 495 Clinicaltrials.gov. Permacol Paste in Perianal Crohn's Disease (UPpCro). Trial ID: NCT03776825. 2018. Status: Recruiting. Available from: <https://clinicaltrials.gov/ct2/show/record/NCT03776825> [Accessed 11 August 2020].
- 496 Clinicaltrials.gov. Laser Therapy in Managing Vaginal Prolapse. Trial ID: NCT03714607. 2018. Status: Active- Not Recruiting. Available from: <https://clinicaltrials.gov/ct2/show/record/NCT03714607> [Accessed 11 August 2020].
- 497 Clinicaltrials.gov. Voiding School as a Treatment of Children's Day-time Incontinence or Enuresis. Trial ID: NCT03478813. 2018. Status: Other. Available from: <https://clinicaltrials.gov/ct2/show/record/NCT03478813> [Accessed 11 August 2020].
- 498 Clinicaltrials.gov. A Study to Evaluate the Safety- Tolerability- PK and PD of DA-1241 in Healthy Male Subjects and Subjects With T2DM. Trial ID: NCT03646721. 2018. Status: Recruiting. Available from: <https://clinicaltrials.gov/ct2/show/record/NCT03646721> [Accessed 11 August 2020].
- 499 Clinicaltrials.gov. The Protective Immune Response to Attenuated Enterotoxigenic Escherichia Coli Infection (MIRRE). Trial ID: NCT03596827. 2018. Status: Completed. Available from: <https://clinicaltrials.gov/ct2/show/record/NCT03596827> [Accessed 11 August 2020].
- 500 Clinicaltrials.gov. PREDICTors for Quality of Life After Sigmoidectomy for DIVerticular Disease (PREDIC-DIV). Trial ID: NCT03527706. 2018. Status: Recruiting. Available from: <https://clinicaltrials.gov/ct2/show/record/NCT03527706> [Accessed 11 August 2020].

- 501 Clinicaltrials.gov. The Role of Short Chain Fatty Acids in Microbiota-gut-brain Axis (SCFA-AP). Trial ID: NCT03688854. 2018. Status: Completed. Available from: <https://clinicaltrials.gov/ct2/show/record/NCT03688854> [Accessed 11 August 2020].
- 502 Clinicaltrials.gov. Treatment by HIFU With Focal One of Posterior Deep Infiltrating Endometriosis Lesions With Intestinal Involvement. Trial ID: NCT03613298. 2018. Status: Completed. Available from: <https://clinicaltrials.gov/ct2/show/record/NCT03613298> [Accessed 11 August 2020].
- 503 Clinicaltrials.gov. Robot-assisted Versus Standard Laparoscopic Approach for the Surgical Treatment of Deep Infiltrating Endometriosis. Trial ID: NCT03633786. 2018. Status: Recruiting. Available from: <https://clinicaltrials.gov/ct2/show/record/NCT03633786> [Accessed 11 August 2020].
- 504 Clinicaltrials.gov. NEC Screening Abdominal Radiograph vs Bowel Ultrasound in Premies. Trial ID: NCT03963011. 2018. Status: Recruiting. Available from: <https://clinicaltrials.gov/ct2/show/record/NCT03963011> [Accessed 11 August 2020].
- 505 Clinicaltrials.gov. Innate Immunity in Eosinophilic Esophagitis (CLOE). Trial ID: NCT03640975. 2018. Status: Not Yet Recruiting. Available from: <https://clinicaltrials.gov/ct2/show/record/NCT03640975> [Accessed 11 August 2020].
- 506 Clinicaltrials.gov. FMT in Inflammatory Bowel Disease. Trial ID: NCT03477032. 2018. Status: Recruiting. Available from: <https://clinicaltrials.gov/ct2/show/record/NCT03477032> [Accessed 11 August 2020].
- 507 Clinicaltrials.gov. A Study to Assess Primarily the Tolerability and Safety of SAR439794 After Repeated Sublingual Daily Administration in Peanut Allergic Adult and Adolescent Patients. Trial ID: NCT03463135. 2018. Status: Active- Not Recruiting. Available from: <https://clinicaltrials.gov/ct2/show/record/NCT03463135> [Accessed 11 August 2020].
- 508 Clinicaltrials.gov. The Effects of Dietary Fiber on the Gut Microbiome and HDL Particles of Human Subjects. Trial ID: NCT03785860. 2018. Status: Recruiting. Available from: <https://clinicaltrials.gov/ct2/show/record/NCT03785860> [Accessed 11 August 2020].
- 509 Clinicaltrials.gov. A Comparative Pharmacokinetic Study to Evaluate the Ability of a New Formulation to Enhance Curcuminoids Bioavailability (TURBIO). Trial ID: NCT03621865. 2018. Status: Completed. Available from: <https://clinicaltrials.gov/ct2/show/record/NCT03621865> [Accessed 11 August 2020].
- 510 Clinicaltrials.gov. Pharmacokinetics Assessing Bioavailability of Gingerols and Shogaols of Five Ginger Extracts (KING). Trial ID: NCT03698318. 2018. Status: Active- Not Recruiting. Available from: <https://clinicaltrials.gov/ct2/show/record/NCT03698318> [Accessed 11 August 2020].
- 511 Clinicaltrials.gov. Tocilizumab in Cardiac Transplantation. Trial ID: NCT03644667. 2018. Status: Recruiting. Available from: <https://clinicaltrials.gov/ct2/show/record/NCT03644667> [Accessed 11 August 2020].
- 512 Clinicaltrials.gov. Randomized Trial :Hemorrhoidal Pedicle Ligation vs Laser vs Open Hemorrhoidectomy. Trial ID: NCT03757728. 2018. Status: Invitation. Available from: <https://clinicaltrials.gov/ct2/show/record/NCT03757728> [Accessed 11 August 2020].
- 513 Clinicaltrials.gov. Spinal Anesthesia For Enhanced Recovery After Liver Surgery (SAFER-L). Trial ID: NCT03715517. 2018. Status: Recruiting. Available from: <https://clinicaltrials.gov/ct2/show/record/NCT03715517> [Accessed 11 August 2020].
- 514 Clinicaltrials.gov. Confirmatory Clinical Study of Oxiplex. Trial ID: NCT03433391. 2018. Status: Active- Not Recruiting. Available from: <https://clinicaltrials.gov/ct2/show/record/NCT03433391> [Accessed 11 August 2020].
- 515 Clinicaltrials.gov. Effects of Butyrate Enemas on Postoperative Intestinal Mobility Disorders in Hirschsprung's Disease (Buty-Hirsch). Trial ID: NCT03660176. 2018. Status: Not Yet Recruiting. Available from: <https://clinicaltrials.gov/ct2/show/record/NCT03660176> [Accessed 11 August 2020].
- 516 Clinicaltrials.gov. Evaluating the Safety and Pharmacokinetics of PC-1005 Administered Rectally to HIV-1 Seronegative Adults. Trial ID: NCT03408899. 2018. Status: Completed. Available from: <https://clinicaltrials.gov/ct2/show/record/NCT03408899> [Accessed 11 August 2020].
- 517 Clinicaltrials.gov. HIV-1-Gag Conserved-Element DNA Vaccine as Therapeutic Vaccination in HIV-Infected Persons With Viral Suppression on Antiretroviral Therapy. Trial ID: NCT03560258. 2018. Status: Active- Not Recruiting. Available from: <https://clinicaltrials.gov/ct2/show/record/NCT03560258> [Accessed 11 August 2020].
- 518 Clinicaltrials.gov. Snack Foods and Their Impact on Gastrointestinal Microbiology- Function and Symptoms (OptiGut). Trial ID: NCT03581812. 2018. Status: Completed. Available from: <https://clinicaltrials.gov/ct2/show/record/NCT03581812> [Accessed 11 August 2020].



- 519 Clinicaltrials.gov. Treatment of Irritable Bowel Syndrome With Diarrhoea Using Titrated Ondansetron Trial (TRITON). Trial ID: NCT03555188. 2018. Status: Recruiting. Available from: <https://clinicaltrials.gov/ct2/show/record/NCT03555188> [Accessed 11 August 2020].
- 520 Clinicaltrials.gov. RDD1609 as a Treatment for Idiopathic Pruritus Ani. Trial ID: NCT03757403. 2018. Status: Not Yet Recruiting. Available from: <https://clinicaltrials.gov/ct2/show/record/NCT03757403> [Accessed 11 August 2020].
- 521 Clinicaltrials.gov. The CalproSmartNOR Study - a New Clinical Tool for Monitoring Patients With Inflammatory Bowel Disease. Trial ID: NCT03486158. 2018. Status: Active- Not Recruiting. Available from: <https://clinicaltrials.gov/ct2/show/record/NCT03486158> [Accessed 11 August 2020].
- 522 Clinicaltrials.gov. The Role of PET/MRI in the Diagnosis and Treatment of Children and Adolescents With Inflammatory Bowel Diseases (PEDICAD). Trial ID: NCT03640637. 2018. Status: Not Yet Recruiting. Available from: <https://clinicaltrials.gov/ct2/show/record/NCT03640637> [Accessed 11 August 2020].
- 523 Clinicaltrials.gov. The Comparison Between the Biomarkers in Inflammatory Bowel Disease Patients and General Control Group. Trial ID: NCT03778918. 2018. Status: Recruiting. Available from: <https://clinicaltrials.gov/ct2/show/record/NCT03778918> [Accessed 11 August 2020].
- 524 Clinicaltrials.gov. Reactive vs. Proactive Pain Control in IBD (PAIN-Sparing). Trial ID: NCT03798405. 2018. Status: Recruiting. Available from: <https://clinicaltrials.gov/ct2/show/record/NCT03798405> [Accessed 11 August 2020].
- 525 Clinicaltrials.gov. Study of Probable Benefit of the Neuro-Spinal Scaffold in Subjects With Complete Thoracic AIS A Spinal Cord Injury as Compared to Standard of Care (INSPIRE 2). Trial ID: NCT03762655. 2018. Status: Recruiting. Available from: <https://clinicaltrials.gov/ct2/show/record/NCT03762655> [Accessed 11 August 2020].
- 526 Clinicaltrials.gov. Mindfulness Meditation in Treating Insomnia in Multiple Sclerosis. Trial ID: NCT03949296. 2018. Status: Completed. Available from: <https://clinicaltrials.gov/ct2/show/record/NCT03949296> [Accessed 11 August 2020].
- 527 Clinicaltrials.gov. Effects of Dietary Fibre in Irritable Bowel Syndrome (IBS). Trial ID: NCT03803319. 2018. Status: Completed. Available from: <https://clinicaltrials.gov/ct2/show/record/NCT03803319> [Accessed 11 August 2020].
- 528 Clinicaltrials.gov. Health Education Delivery Methods for a Low Fermentable Carbohydrate Diet in Patients With Functional Bowel Disorders. Trial ID: NCT03694223. 2018. Status: Completed. Available from: <https://clinicaltrials.gov/ct2/show/record/NCT03694223> [Accessed 11 August 2020].
- 529 Clinicaltrials.gov. Hydrogen Breath Test an Instrument to Predict Rifaximin-Response in Irritable Bowel Syndrome Predominant Diarrhea. Trial ID: NCT03729271. 2018. Status: Not Yet Recruiting. Available from: <https://clinicaltrials.gov/ct2/show/record/NCT03729271> [Accessed 11 August 2020].
- 530 Clinicaltrials.gov. Panaceo 'MED' for IBS (Irritable Bowel Syndrome) (PCEO-17). Trial ID: NCT03817645. 2018. Status: Recruiting. Available from: <https://clinicaltrials.gov/ct2/show/record/NCT03817645> [Accessed 11 August 2020].
- 531 Clinicaltrials.gov. 3030-401-002 ELX BAM Study. Trial ID: NCT03441581. 2018. Status: Active- Not Recruiting. Available from: <https://clinicaltrials.gov/ct2/show/record/NCT03441581> [Accessed 11 August 2020].
- 532 Clinicaltrials.gov. Trial of Carbon Ion Versus Photon Radiotherapy for Locally Advanced- Unresectable Pancreatic Cancer (CIPHER). Trial ID: NCT03536182. 2018. Status: Active- Not Recruiting. Available from: <https://clinicaltrials.gov/ct2/show/record/NCT03536182> [Accessed 11 August 2020].
- 533 Clinicaltrials.gov. Evaluation of Efficacy- Quality of Life and Cost Effectiveness of Short-course Radiotherapy Followed by Capecitabine Plus Oxaliplatin chemotherapy and TME for High-risk Rectal Cancer (ESCORT Trial). Trial ID: NCT03676517. 2018. Status: Not Yet Recruiting. Available from: <https://clinicaltrials.gov/ct2/show/record/NCT03676517> [Accessed 11 August 2020].
- 534 Clinicaltrials.gov. Innovative Imaging of Cerebrum and Muscle (iCAM) Repeatability Study (iCAM). Trial ID: NCT03548168. 2018. Status: Recruiting. Available from: <https://clinicaltrials.gov/ct2/show/record/NCT03548168> [Accessed 11 August 2020].
- 535 Clinicaltrials.gov. Spot-Scanning Based Hypofractionated Proton Therapy for Low and Intermediate Risk Prostate Cancer. Trial ID: NCT03740191. 2018. Status: Recruiting. Available from: <https://clinicaltrials.gov/ct2/show/record/NCT03740191> [Accessed 11 August 2020].
- 536 Clinicaltrials.gov. Study of Neratinib +Trastuzumab or Neratinib + Cetuximab in Patients With KRAS/NRAS/BRAF/PIK3CA Wild-Type Metastatic Colorectal Cancer by HER2 Status. Trial ID: NCT03457896. 2018. Status: Recruiting. Available from: <https://clinicaltrials.gov/ct2/show/record/NCT03457896> [Accessed 11 August 2020].



- 537 Clinicaltrials.gov. Muscle Wasting in the Critically Ill. Trial ID: NCT03770442. 2018. Status: Not Yet Recruiting. Available from: <https://clinicaltrials.gov/ct2/show/record/NCT03770442> [Accessed 11 August 2020].
- 538 Clinicaltrials.gov. TMQLB Versus TPVB for Acute Pain and Quality of Recovery After Laparoscopic Renal Surgery. Trial ID: NCT03414281. 2018. Status: Recruiting. Available from: <https://clinicaltrials.gov/ct2/show/record/NCT03414281> [Accessed 11 August 2020].
- 539 Clinicaltrials.gov. The Effects of 12 Weeks Supplementation With a B-vitamin and Herbal Supplement on Neurocognitive Function and Mood (MAST). Trial ID: NCT03482063. 2018. Status: Recruiting. Available from: <https://clinicaltrials.gov/ct2/show/record/NCT03482063> [Accessed 11 August 2020].
- 540 Clinicaltrials.gov. A Study to Determine Safety of Durvalumab After Sequential Chemo Radiation in Patients With Unresectable Stage III Non-Small Cell Lung Cancer. Trial ID: NCT03693300. 2018. Status: Recruiting. Available from: <https://clinicaltrials.gov/ct2/show/record/NCT03693300> [Accessed 11 August 2020].
- 541 Clinicaltrials.gov. The Comparison Between Traditional Laparoscopy-assisted Surgery and NOSES in Radical Resection of Colorectal Cancer. Trial ID: NCT03470142. 2018. Status: Recruiting. Available from: <https://clinicaltrials.gov/ct2/show/record/NCT03470142> [Accessed 11 August 2020].
- 542 Clinicaltrials.gov. Management and Outcomes of Congenital Anomalies in Low- Middle- and High-Income Countries. Trial ID: NCT03666767. 2018. Status: Completed. Available from: <https://clinicaltrials.gov/ct2/show/record/NCT03666767> [Accessed 11 August 2020].
- 543 Clinicaltrials.gov. Boost Brittle Bones Before Birth (BOOSTB4). Trial ID: NCT03706482. 2018. Status: Recruiting. Available from: <https://clinicaltrials.gov/ct2/show/record/NCT03706482> [Accessed 11 August 2020].
- 544 Clinicaltrials.gov. Pembrolizumab in Combination With Bevacizumab and Pegylated Liposomal Doxorubicin in Patients With Ovarian Cancer (PEMBOV). Trial ID: NCT03596281. 2018. Status: Not Yet Recruiting. Available from: <https://clinicaltrials.gov/ct2/show/record/NCT03596281> [Accessed 11 August 2020].
- 545 Clinicaltrials.gov. Avelumab and Talazoparib in Untreated Advanced Ovarian Cancer (JAVELIN OVARIAN PARP 100). Trial ID: NCT03642132. 2018. Status: Active- Not Recruiting. Available from: <https://clinicaltrials.gov/ct2/show/record/NCT03642132> [Accessed 11 August 2020].
- 546 Clinicaltrials.gov. European Trial on Enhanced DNA Repair Inhibition in Ovarian Cancer (EUDARIO). Trial ID: NCT03783949. 2018. Status: Recruiting. Available from: <https://clinicaltrials.gov/ct2/show/record/NCT03783949> [Accessed 11 August 2020].
- 547 Clinicaltrials.gov. CT-guided Ablation of the Ganglion Impar for Pelvic Tumors: Compare the Addition of Ketorolac or Dexamethasone. Trial ID: NCT03789227. 2018. Status: Recruiting. Available from: <https://clinicaltrials.gov/ct2/show/record/NCT03789227> [Accessed 11 August 2020].
- 548 Clinicaltrials.gov. The Effect of Perioperative Intravenous Lidocaine Infusion on Opioid Consumption After Lumbar Spine Surgery. Trial ID: NCT03624985. 2018. Status: Recruiting. Available from: <https://clinicaltrials.gov/ct2/show/record/NCT03624985> [Accessed 11 August 2020].
- 549 Clinicaltrials.gov. Safety and Tolerability of SYN1618 in Healthy Adult Volunteers and Adult Subjects With Phenylketonuria (PKU). Trial ID: NCT03516487. 2018. Status: Completed. Available from: <https://clinicaltrials.gov/ct2/show/record/NCT03516487> [Accessed 11 August 2020].
- 550 Clinicaltrials.gov. Initiative to Minimize Disparities in Postoperative Prostate Cancer Care. Trial ID: NCT03755492. 2018. Status: Recruiting. Available from: <https://clinicaltrials.gov/ct2/show/record/NCT03755492> [Accessed 11 August 2020].
- 551 Clinicaltrials.gov. Effect of SmtO2 Guided Care on PONV (iMODIPONV) (iMODIPONV). Trial ID: NCT03641625. 2018. Status: Completed. Available from: <https://clinicaltrials.gov/ct2/show/record/NCT03641625> [Accessed 11 August 2020].
- 552 Clinicaltrials.gov. Primary Ovarian Insufficiency: Phenotype and Optimal Treatment. Trial ID: NCT03568708. 2018. Status: Recruiting. Available from: <https://clinicaltrials.gov/ct2/show/record/NCT03568708> [Accessed 11 August 2020].
- 553 Clinicaltrials.gov. Clinical and Dynamic Floor MRI Evaluation Before and After Prolapse Surgery. Trial ID: NCT03400007. 2018. Status: Recruiting. Available from: <https://clinicaltrials.gov/ct2/show/record/NCT03400007> [Accessed 11 August 2020].
- 554 Clinicaltrials.gov. Assisted Promontofixation Using Glue Versus Promontofixation Using Threads (PROCOL) (PROCOL). Trial ID: NCT03624764. 2018. Status: Active- Not Recruiting. Available from: <https://clinicaltrials.gov/ct2/show/record/NCT03624764> [Accessed 11 August 2020].

- 555 Clinicaltrials.gov. Fluciclovine F18 or Ga68-PSMA PET/CT to Enhance Prostate Cancer Outcomes. Trial ID: NCT03762759. 2018. Status: Recruiting. Available from: <https://clinicaltrials.gov/ct2/show/record/NCT03762759> [Accessed 11 August 2020].
- 556 Clinicaltrials.gov. Efficacy of a Couple-Focused mHealth Symptom Self-management Program. Trial ID: NCT03489057. 2018. Status: Recruiting. Available from: <https://clinicaltrials.gov/ct2/show/record/NCT03489057> [Accessed 11 August 2020].
- 557 Clinicaltrials.gov. A Prospective Comparative Study of Outcomes With Proton and Photon Radiation in Prostate Cancer (COMPPARE). Trial ID: NCT03561220. 2018. Status: Recruiting. Available from: <https://clinicaltrials.gov/ct2/show/record/NCT03561220> [Accessed 11 August 2020].
- 558 Clinicaltrials.gov. Efficacy Evaluation of Focused HIFU (High Intensity Focused Ultrasound) Therapy in Patients With Localized Intermediate Risk Prostate Cancer (FOCALE). Trial ID: NCT03568188. 2018. Status: Recruiting. Available from: <https://clinicaltrials.gov/ct2/show/record/NCT03568188> [Accessed 11 August 2020].
- 559 Clinicaltrials.gov. Prostate Cancer - Patient Empowerment Program (PC-PEP). Trial ID: NCT03660085. 2018. Status: Recruiting. Available from: <https://clinicaltrials.gov/ct2/show/record/NCT03660085> [Accessed 11 August 2020].
- 560 Clinicaltrials.gov. Improving Quality of Life of Prostate Cancer Survivors With Androgen Deficiency. Trial ID: NCT03716739. 2018. Status: Recruiting. Available from: <https://clinicaltrials.gov/ct2/show/record/NCT03716739> [Accessed 11 August 2020].
- 561 Clinicaltrials.gov. A Prospective- Randomized Trial Comparing Office-based MR-guided Prostate Biopsy Approaches. Trial ID: NCT03632655. 2018. Status: Recruiting. Available from: <https://clinicaltrials.gov/ct2/show/record/NCT03632655> [Accessed 11 August 2020].
- 562 Clinicaltrials.gov. Cosmetic Appeal- HRQoL and Effectiveness of Simple and Pseudotesticular Techniques of Orchidectomy in Prostate Cancer (TEPSO). Trial ID: NCT03744494. 2018. Status: Completed. Available from: <https://clinicaltrials.gov/ct2/show/record/NCT03744494> [Accessed 11 August 2020].
- 563 Clinicaltrials.gov. Impact of Perioperative Analgesia in Prostatectomy Patients on Early Quality of Recovery (SPITALIDO) (SPITALIDO). Trial ID: NCT03618693. 2018. Status: Recruiting. Available from: <https://clinicaltrials.gov/ct2/show/record/NCT03618693> [Accessed 11 August 2020].
- 564 Clinicaltrials.gov. Stereotactic Body Radiation Therapy in Treating Patients With Localized Prostate Cancer That Have Undergone Surgery. Trial ID: NCT03541850. 2018. Status: Recruiting. Available from: <https://clinicaltrials.gov/ct2/show/record/NCT03541850> [Accessed 11 August 2020].
- 565 Clinicaltrials.gov. Body Composition of People After a Stroke. Trial ID: NCT03722602. 2018. Status: Completed. Available from: <https://clinicaltrials.gov/ct2/show/record/NCT03722602> [Accessed 11 August 2020].
- 566 Clinicaltrials.gov. Trimodal Therapy Plus Atezolizumab in Muscle-invasive Bladder Cancer. Trial ID: NCT03620435. 2018. Status: Recruiting. Available from: <https://clinicaltrials.gov/ct2/show/record/NCT03620435> [Accessed 11 August 2020].
- 567 Clinicaltrials.gov. Efficacy- Safety- and Tolerability of ATM-AVI in the Treatment of Serious Infection Due to MBL-producing Gram-negative Bacteria. Trial ID: NCT03580044. 2018. Status: Not Yet Recruiting. Available from: <https://clinicaltrials.gov/ct2/show/record/NCT03580044> [Accessed 11 August 2020].
- 568 Clinicaltrials.gov. Therapeutic Approaches to Malnutrition Enteropathy (TAME). Trial ID: NCT03716115. 2018. Status: Not Yet Recruiting. Available from: <https://clinicaltrials.gov/ct2/show/record/NCT03716115> [Accessed 11 August 2020].
- 569 Clinicaltrials.gov. Analysis of the Microbiota and STEMI. Trial ID: NCT03439592. 2018. Status: Other. Available from: <https://clinicaltrials.gov/ct2/show/record/NCT03439592> [Accessed 11 August 2020].
- 570 Clinicaltrials.gov. To Evaluate the Use of Bioresorbable Tephaflex Sling for Stress Urinary Incontinence (Tephaflex). Trial ID: NCT03673488. 2018. Status: Recruiting. Available from: <https://clinicaltrials.gov/ct2/show/record/NCT03673488> [Accessed 11 August 2020].
- 571 Clinicaltrials.gov. Assisted Rehabilitation Care During Post-stroke mANaGement: fEasibility Assessment (ARCANGEL). Trial ID: NCT03787433. 2018. Status: Active- Not Recruiting. Available from: <https://clinicaltrials.gov/ct2/show/record/NCT03787433> [Accessed 11 August 2020].
- 572 Clinicaltrials.gov. The Effect of Exercise by Mechanical Hippotherapy Device on Postural Stability and Balance in Stroke. Trial ID: NCT03528993. 2018. Status: Completed. Available from: <https://clinicaltrials.gov/ct2/show/record/NCT03528993> [Accessed 11 August 2020].

- 573 Clinicaltrials.gov. Evaluation of the GORE EXCLUDER Thoracoabdominal Branch Endoprosthesis in the Treatment of Thoracoabdominal and Pararenal Aortic Aneurysms (TAMBE). Trial ID: NCT03728985. 2018. Status: Recruiting. Available from: <https://clinicaltrials.gov/ct2/show/record/NCT03728985> [Accessed 11 August 2020].
- 574 Clinicaltrials.gov. Quality of Life After Transanal Endoscopic Microsurgery (TEM) (QoLTEM). Trial ID: NCT03675243. 2018. Status: Recruiting. Available from: <https://clinicaltrials.gov/ct2/show/record/NCT03675243> [Accessed 11 August 2020].
- 575 Clinicaltrials.gov. Brain and Gut Plasticity in Mild TBI Following Growth Hormone Therapy. Trial ID: NCT03554265. 2018. Status: Recruiting. Available from: <https://clinicaltrials.gov/ct2/show/record/NCT03554265> [Accessed 11 August 2020].
- 576 Clinicaltrials.gov. Efficacy and Safety of Sotagliflozin Versus Placebo in Chinese Patients With Type 2 Diabetes Mellitus Not Adequately Controlled by Metformin With or Without Sulfonylurea. Trial ID: NCT03761134. 2018. Status: Recruiting. Available from: <https://clinicaltrials.gov/ct2/show/record/NCT03761134> [Accessed 11 August 2020].
- 577 Clinicaltrials.gov. Pro-active Fecal Calprotectin Monitoring PROMOTE-UC. Trial ID: NCT03549988. 2018. Status: Recruiting. Available from: <https://clinicaltrials.gov/ct2/show/record/NCT03549988> [Accessed 11 August 2020].
- 578 Clinicaltrials.gov. Short or Long Interval to Ileostomy Reversal After Ileal Pouch Surgery (SLIRPS). Trial ID: NCT03587519. 2018. Status: Invitation. Available from: <https://clinicaltrials.gov/ct2/show/record/NCT03587519> [Accessed 11 August 2020].
- 579 Clinicaltrials.gov. Multi-center Acute Severe Ulcerative Colitis Cohort Study (MASCC) (MASCC). Trial ID: NCT03669822. 2018. Status: Recruiting. Available from: <https://clinicaltrials.gov/ct2/show/record/NCT03669822> [Accessed 11 August 2020].
- 580 Clinicaltrials.gov. EFFICACI : EFFicacy of Intravenous Infliximab Versus Vedolizumab After Failure of subCutaneous Anti-TNF in Patients With UlCerative Colitis (EFFICACI). Trial ID: NCT03679546. 2018. Status: Recruiting. Available from: <https://clinicaltrials.gov/ct2/show/record/NCT03679546> [Accessed 11 August 2020].
- 581 Clinicaltrials.gov. Safety and Efficacy of PBF-677 in Ulcerative Colitis Patients (ADENOIBD). Trial ID: NCT03773952. 2018. Status: Recruiting. Available from: <https://clinicaltrials.gov/ct2/show/record/NCT03773952> [Accessed 11 August 2020].
- 582 Clinicaltrials.gov. A Study of the Efficacy and Safety of Upadacitinib (ABT-494) in Participants With Moderately to Severely Active Ulcerative Colitis (U-Accomplish). Trial ID: NCT03653026. 2018. Status: Recruiting. Available from: <https://clinicaltrials.gov/ct2/show/record/NCT03653026> [Accessed 11 August 2020].
- 583 Clinicaltrials.gov. Effects of Transcutaneous Perineal Stimulation Versus Anal Stimulation. Trial ID: NCT03587402. 2018. Status: Active- Not Recruiting. Available from: <https://clinicaltrials.gov/ct2/show/record/NCT03587402> [Accessed 11 August 2020].
- 584 Clinicaltrials.gov. Canadian Experience With Contiform Intravaginal Device For The Treatment Of Stress Incontinence. Trial ID: NCT03614611. 2018. Status: Recruiting. Available from: <https://clinicaltrials.gov/ct2/show/record/NCT03614611> [Accessed 11 August 2020].
- 585 Clinicaltrials.gov. Gentamicin Bladder Instillations to Prevent Urinary Tract Infections in Patients With Spinal Cord Injury. Trial ID: NCT03503513. 2018. Status: Recruiting. Available from: <https://clinicaltrials.gov/ct2/show/record/NCT03503513> [Accessed 11 August 2020].
- 586 Clinicaltrials.gov. Vaginal Estrogen on Postpartum Atrophy- Perineal Pain- and Sexual Function. Trial ID: NCT03493126. 2018. Status: Recruiting. Available from: <https://clinicaltrials.gov/ct2/show/record/NCT03493126> [Accessed 11 August 2020].
- 587 Clinicaltrials.gov. Sacrocolpopexy With Posterior Repair Obstructed Defecation Symptoms. Trial ID: NCT03658395. 2018. Status: Recruiting. Available from: <https://clinicaltrials.gov/ct2/show/record/NCT03658395> [Accessed 11 August 2020].
- 588 Clinicaltrials.gov. Restorelle Y Mesh vs. Vertessa Lite Y Mesh for Laparoscopic and Robotic-assisted Laparoscopic Sacrocolpopexy (Lite-Y). Trial ID: NCT03681223. 2018. Status: Recruiting. Available from: <https://clinicaltrials.gov/ct2/show/record/NCT03681223> [Accessed 11 August 2020].
- 589 Clinicaltrials.gov. Analysis of Volatile Organic Compounds in the Exhaled Air in Inflammatory Bowel Disease. Trial ID: NCT03414580. 2018. Status: Recruiting. Available from: <https://clinicaltrials.gov/ct2/show/record/NCT03414580> [Accessed 11 August 2020].
- 590 Clinicaltrials.gov. Bladder Antimuscarinic Medication and Accidental Bowel Leakage (BAMA). Trial ID: NCT03543566. 2018. Status: Completed. Available from: <https://clinicaltrials.gov/ct2/show/record/NCT03543566> [Accessed 11 August 2020].

- 591 Clinicaltrials.gov. What is the Prevalence of Female Pelvic Floor Disorders in Minnesota? Trial ID: NCT03536221. 2018. Status: Completed. Available from: <https://clinicaltrials.gov/ct2/show/record/NCT03536221> [Accessed 11 August 2020].
- 592 Clinicaltrials.gov. Histopathological Comparison Between Superficial Pressure Ulcers and Incontinence-associated Dermatitis. Trial ID: NCT03685929. 2018. Status: Not Yet Recruiting. Available from: <https://clinicaltrials.gov/ct2/show/record/NCT03685929> [Accessed 11 August 2020].
- 593 Clinicaltrials.gov. Vaginally Assisted Laparoscopic Hysteropexy Versus Vaginal Hysterectomy. Trial ID: NCT03436147. 2018. Status: Other. Available from: <https://clinicaltrials.gov/ct2/show/record/NCT03436147> [Accessed 11 August 2020].
- 594 Clinicaltrials.gov. Laparoscopic Lateral Suspension With Mesh & Sacrocervicopexy for the Treatment of Uterine Prolapse. Trial ID: NCT03421457. 2018. Status: Completed. Available from: <https://clinicaltrials.gov/ct2/show/record/NCT03421457> [Accessed 11 August 2020].
- 595 Clinicaltrials.gov. Different Types of Suture for Sacral Colpopexy. Trial ID: NCT03582410. 2018. Status: Completed. Available from: <https://clinicaltrials.gov/ct2/show/record/NCT03582410> [Accessed 11 August 2020].
- 596 Clinicaltrials.gov. Total Laparoscopic Hysterectomy With Sacrocolpopexy Versus Total Laparoscopic Hysterectomy With Lateral Suspension in Patients With Pelvic Organ Prolapse. Trial ID: NCT03722563. 2018. Status: Recruiting. Available from: <https://clinicaltrials.gov/ct2/show/record/NCT03722563> [Accessed 11 August 2020].
- 597 Clinicaltrials.gov. Nonabsorbable Versus Absorbable Sutures for Anterior Colporrhaphy. Trial ID: NCT03736811. 2018. Status: Recruiting. Available from: <https://clinicaltrials.gov/ct2/show/record/NCT03736811> [Accessed 11 August 2020].
- 598 Clinicaltrials.gov. Laparoscopic Hysterectomy With Vaginal Vault Suspension to the Uterosacral Ligaments for Stage II-III Pelvic Organ Prolapse. (LULS-1). Trial ID: NCT03553511. 2018. Status: Not Yet Recruiting. Available from: <https://clinicaltrials.gov/ct2/show/record/NCT03553511> [Accessed 11 August 2020].
- 599 Clinicaltrials.gov. Pelvic Floor Dysfunction and Its Influence on Body Image and Sexual Function (PFD-BI). Trial ID: NCT03591393. 2018. Status: Recruiting. Available from: <https://clinicaltrials.gov/ct2/show/record/NCT03591393> [Accessed 11 August 2020].
- 600 EU Clinical Trials Register. Double-blind- randomized- placebo-controlled- phase III study comparing norursodeoxycholic acid capsules with placebo in the treatment of primary sclerosing cholangitis tude de phase III randomis e- contre placebo- en double aveugle comparant des g lules d'acide nor-ursod soxycholique au placebo dans le traitement de la cholangite scl rosante primitive. Trial ID: 2016-003367-19/FR. 2018. Status: Ongoing. Available from: <https://www.clinicaltrialsregister.eu/ctr-search/trial/2016-003367-19/FR> [Accessed 11 August 2020].
- 601 EU Clinical Trials Register. A Randomized- Double-blind- Placebo-controlled- Parallel-group- 12-week Proof-of-Concept (PoC) Study to Assess the Efficacy- Safety- and Tolerability of SAR440340/REGN3500 and the Coadministration of SAR440340 and Dupilumab in Patients with Moderate-to-severe Asthma who are not well Controlled on Inhaled Corticosteroid (ICS) plus Long-acting 2 Adrenergic Agonist (LABA) Therapy. Trial ID: 2017-003289-29/PL. 2018. Status: Ongoing. Available from: <https://www.clinicaltrialsregister.eu/ctr-search/trial/2017-003289-29/PL> [Accessed 11 August 2020].
- 602 EU Clinical Trials Register. A Phase III- Randomized- Double-Blind- Multicenter- Comparative Study to Determine the Efficacy and Safety of Cefepime-Tazobactam vs. Meropenem followed by Optional Oral Therapy in the Treatment of Complicated Urinary Tract Infection or Acute Pyelonephritis in Adults Randomizovan - dvojit zaslepen - multicentrick - srovn vac klinick hodnocen f ze III- zji uj c innost a bezpe nost p pravku Cefepime-Tazobactam ve srovn n s Meropenem- s n slednou volitelnou peror ln terapi - p i l b komplikovan infekce mo ov ch cest nebo akutn pyelonefritidy dosp l ch; Phase III study of cefepime-tazobactam (FEP-TAZ) in cUTI or AP. Trial ID: 2017-005117-31/CZ. 2018. Status: Completed. Available from: <https://www.clinicaltrialsregister.eu/ctr-search/trial/2017-005117-31/CZ> [Accessed 11 August 2020].
- 603 EU Clinical Trials Register. Evaluate the Safety and Efficacy of ALLN-177 in Patients with Enteric Hyperoxaluria: A Phase III Randomized- Placebo-Controlled Study. Trial ID: 2017-004352-33/GB. 2018. Status: Completed. Available from: <https://www.clinicaltrialsregister.eu/ctr-search/trial/2017-004352-33/GB> [Accessed 11 August 2020].
- 604 EU Clinical Trials Register. Pilot Study of ALLN-177 in Adult and Pediatric Subjects Aged 12 Years or Older with Enteric or Primary Hyperoxaluria and Hyperoxalemia. Trial ID: 2017-003547-38/GB. 2018. Status: Ongoing. Available from: <https://www.clinicaltrialsregister.eu/ctr-search/trial/2017-003547-38/GB> [Accessed 11 August 2020].

- 605 EU Clinical Trials Register. A Phase IIa (proof of concept)- randomized- double blind- placebo controlled- multicenter clinical trial to evaluate the safety and efficacy of oral treatment with PBF-677 in patients with mild to moderate ulcerative colitis. Ensayo clínico multicéntrico de fase IIa (prueba de concepto) aleatorizado- con doble enmascaramiento y controlado con placebo para evaluar la seguridad y eficacia del tratamiento oral con PBF-677 en pacientes con colitis ulcerosa de leve a moderada. Trial ID: 2017-003228-54/ES. 2018. Status: Ongoing. Available from: <https://www.clinicaltrialsregister.eu/ctr-search/trial/2017-003228-54/ES> [Accessed 11 August 2020].
- 606 EU Clinical Trials Register. Comparison of ambulatory glucose profile prior to and during pancreatic enzyme replacement therapy in patients with diabetes and pancreatic exocrine insufficiency: a single-arm phase IV trial; Pancreatic replacement therapy and glycaemic control in diabetes v1.0. Trial ID: 2017-001227-45/GB. 2018. Status: Ongoing. Available from: <https://www.clinicaltrialsregister.eu/ctr-search/trial/2017-001227-45/GB> [Accessed 11 August 2020].
- 607 EU Clinical Trials Register. EFFICACI: Efficacy of intravenous Infliximab versus vedolizumab after failure of subcutaneous Anti-TNF in patients with Ulcerative colitis: A double blinded Randomized Clinical Trial. EFFICACI: Efficacité de l'Infliximab versus le vedolizumab après échec d'un traitement par anti-TNF sous-cutané chez des patients atteints de rectocolite hémorragique: essai clinique randomisé contrôlé en double aveugle; EFFICACI EFFICACI. Trial ID: 2018-002673-21/FR. 2018. Status: Ongoing. Available from: <https://www.clinicaltrialsregister.eu/ctr-search/trial/2018-002673-21/FR> [Accessed 11 August 2020].
- 608 EU Clinical Trials Register. Investigation of the Faecal loss of Vedolizumab and its role in influencing serum drug levels- Outcomes and Response in ulcerative colitis; FAVOUR. Trial ID: 2018-002794-21/GB. 2018. Status: Ongoing. Available from: <https://www.clinicaltrialsregister.eu/ctr-search/trial/2018-002794-21/GB> [Accessed 11 August 2020].
- 609 ISRCTN Registry. Bowel scope screening: interventions to increase uptake in Yorkshire. Trial ID: ISRCTN16252122. 2018. Status: Completed. Available from: <http://www.isrctn.com/ISRCTN16252122> [Accessed 11 August 2020].
- 610 ISRCTN Registry. Steps towards increasing bowel cancer screening uptake: a randomised controlled trial. Trial ID: ISRCTN39941749. 2018. Status: Completed. Available from: <http://www.isrctn.com/ISRCTN39941749> [Accessed 11 August 2020].
- 611 ISRCTN Registry. Memory Intervention with Nutrition for Dementia (re-MIND). Trial ID: ISRCTN11892249. 2018. Status: Recruiting. Available from: <http://www.isrctn.com/ISRCTN11892249> [Accessed 11 August 2020].
- 612 ISRCTN Registry. The BD Odon Device for assisted vaginal birth. Trial ID: ISRCTN10203171. 2018. Status: Completed. Available from: <http://www.isrctn.com/ISRCTN10203171> [Accessed 11 August 2020].
- 613 ISRCTN Registry. The treatment of chronic anal fissures with fissure excision and Botulinum Toxin Type A injection. Trial ID: ISRCTN97413456. 2018. Status: Completed. Available from: <http://www.isrctn.com/ISRCTN97413456> [Accessed 11 August 2020].
- 614 ISRCTN Registry. Encouraging compliance with bowel and cervical cancer screening using behavioural nudges. Trial ID: ISRCTN94361793. 2018. Status: Completed. Available from: <http://www.isrctn.com/ISRCTN94361793> [Accessed 11 August 2020].
- 615 ISRCTN Registry. Recovery study of *L. casei* DG (Enterolactis bebibile) in healthy children. Trial ID: ISRCTN61742259. 2018. Status: Completed. Available from: <http://www.isrctn.com/ISRCTN61742259> [Accessed 11 August 2020].
- 616 ISRCTN Registry. Anal Sphincter in patients with faecal incontinence: a multicentre prospective evaluation in the UK. Trial ID: ISRCTN61603070. 2018. Status: Recruiting. Available from: <http://www.isrctn.com/ISRCTN61603070> [Accessed 11 August 2020].
- 617 ISRCTN Registry. Understanding cauda equina syndrome (UCES). Trial ID: ISRCTN16828522. 2018. Status: Recruiting. Available from: <http://www.isrctn.com/ISRCTN16828522> [Accessed 11 August 2020].
- 618 Thai Clinical Trials Registry (TCTR). Randomized Controlled Trial: ERAS Program on Colorectal Cancer Surgery Decrease Length of Hospital Stay. Trial ID: TCTR20180129009. 2018. Status: Active- Not Recruiting. Available from: <http://www.clinicaltrials.in.th/index.php?tp=regtrials&menu=trialssearch&smenu=fulltext&task=search&task2=view1&id=3184> [Accessed 11 August 2020].
- 619 UMIN Clinical Trials Registry (UMIN-CTR). The efficacy of Daikenchuto (TJ-100) on abdominal discomfort (pain) in patients with defecation disorders: a retrospective study. Trial ID: UMIN000031475. 2018. Status: Active- Not Recruiting. Available from: [https://upload.umin.ac.jp/cgi-open-bin/ctr\\_e/ctr\\_view.cgi?recptno=R000035929](https://upload.umin.ac.jp/cgi-open-bin/ctr_e/ctr_view.cgi?recptno=R000035929) [Accessed 11 August 2020].



- 620 UMIN Clinical Trials Registry (UMIN-CTR). Disorder of defecation accompanying sexual cycle of Japanese female in twenties. Trial ID: UMIN000033241. 2018. Status: Not Yet Recruiting. Available from: [https://upload.umin.ac.jp/cgi-open-bin/ctr\\_e/ctr\\_view.cgi?recptno=R000037900](https://upload.umin.ac.jp/cgi-open-bin/ctr_e/ctr_view.cgi?recptno=R000037900) [Accessed 11 August 2020].
- 621 UMIN Clinical Trials Registry (UMIN-CTR). The effect of gum chewing and/or early oral intake on bowel function recovery. Trial ID: UMIN000032062. 2018. Status: Recruiting. Available from: [https://upload.umin.ac.jp/cgi-open-bin/ctr\\_e/ctr\\_view.cgi?recptno=R000036575](https://upload.umin.ac.jp/cgi-open-bin/ctr_e/ctr_view.cgi?recptno=R000036575) [Accessed 11 August 2020].
- 622 UMIN Clinical Trials Registry (UMIN-CTR). A study on colonic decompression as bridge to surgery for obstructive colon cancer. Trial ID: UMIN000033931. 2018. Status: Recruiting. Available from: [https://upload.umin.ac.jp/cgi-open-bin/ctr\\_e/ctr\\_view.cgi?recptno=R000038697](https://upload.umin.ac.jp/cgi-open-bin/ctr_e/ctr_view.cgi?recptno=R000038697) [Accessed 11 August 2020].
- 623 UMIN Clinical Trials Registry (UMIN-CTR). improving oral function and soiling. Trial ID: UMIN000033543. 2018. Status: Not Yet Recruiting. Available from: [https://upload.umin.ac.jp/cgi-open-bin/ctr\\_e/ctr\\_view.cgi?recptno=R000038249](https://upload.umin.ac.jp/cgi-open-bin/ctr_e/ctr_view.cgi?recptno=R000038249) [Accessed 11 August 2020].
- 624 UMIN Clinical Trials Registry (UMIN-CTR). Effects of Lactobacillus brevis KB290 intake on bowel movement and intestinal environment: a systematic review with meta-analysis. Trial ID: UMIN000029963. 2018. Status: Not Yet Recruiting. Available from: [https://upload.umin.ac.jp/cgi-open-bin/ctr\\_e/ctr\\_view.cgi?recptno=R000034227](https://upload.umin.ac.jp/cgi-open-bin/ctr_e/ctr_view.cgi?recptno=R000034227) [Accessed 11 August 2020].
- 625 Australian New Zealand Clinical Trials Registry (ANZCTR). FIT for purpose: personalised surveillance colonoscopy for people at increased risk of colorectal cancer. Trial ID: ACTRN12619001743156. 2019. Status: Not Yet Recruiting. Available from: <https://www.anzctr.org.au/Trial/Registration/TrialReview.aspx?id=377876&isReview=true> [Accessed 11 August 2020].
- 626 Australian New Zealand Clinical Trials Registry (ANZCTR). Microbiome in Active and Sedentary Older People (MASOP) Study. Trial ID: ACTRN12619000164190. 2019. Status: Not Yet Recruiting. Available from: <https://www.anzctr.org.au/Trial/Registration/TrialReview.aspx?id=376811&isReview=true> [Accessed 11 August 2020].
- 627 Australian New Zealand Clinical Trials Registry (ANZCTR). Detection of Mycobacterium avium ssp paratuberculosis (MAP) forms in patients with Crohn s disease and controls - a prospective clinical study. Trial ID: ACTRN12619000940178. 2019. Status: Not Yet Recruiting. Available from: <https://www.anzctr.org.au/Trial/Registration/TrialReview.aspx?id=377567&isReview=true> [Accessed 11 August 2020].
- 628 Australian New Zealand Clinical Trials Registry (ANZCTR). What is the effect of increasing dietary resistant starch on gut health and immunity in HIV-positive adults in India and is a feeding trial feasible? Trial ID: ACTRN12619000739112. 2019. Status: Not Yet Recruiting. Available from: <https://www.anzctr.org.au/Trial/Registration/TrialReview.aspx?id=377554&isReview=true> [Accessed 11 August 2020].
- 629 Australian New Zealand Clinical Trials Registry (ANZCTR). Effects on disease activity- self-reported symptoms and microbiota profile in patients with inflammatory bowel disease of a modified anti-inflammatory diet. Trial ID: ACTRN12619001500145p. 2019. Status: Not Yet Recruiting. Available from: <https://www.anzctr.org.au/Trial/Registration/TrialReview.aspx?id=378483&isReview=true> [Accessed 11 August 2020].
- 630 Australian New Zealand Clinical Trials Registry (ANZCTR). A validation trial of IBD.Mindovergut.com: A brief psychological online resilience program for individuals living with Inflammatory Bowel Disease (IBD) and low-to-moderate psychological distress. Trial ID: ACTRN12619001697178p. 2019. Status: Not Yet Recruiting. Available from: <https://www.anzctr.org.au/Trial/Registration/TrialReview.aspx?id=378828&isReview=true> [Accessed 11 August 2020].
- 631 Australian New Zealand Clinical Trials Registry (ANZCTR). A validation trial of IBS.Mindovergut.com: A brief psychological online resilience program for individuals living with Irritable Bowel Syndrome (IBS) and low-to-moderate psychological distress. Trial ID: ACTRN12619001640190p. 2019. Status: Not Yet Recruiting. Available from: <https://www.anzctr.org.au/Trial/Registration/TrialReview.aspx?id=378663&isReview=true> [Accessed 11 August 2020].
- 632 Australian New Zealand Clinical Trials Registry (ANZCTR). The Role of Fistula-tract Laser Closure in the Management of Perianal Fistula (FiLaC). Trial ID: ACTRN12619000493145p. 2019. Status: Not Yet Recruiting. Available from: <https://www.anzctr.org.au/Trial/Registration/TrialReview.aspx?id=377177&isReview=true> [Accessed 11 August 2020].



- 633 Australian New Zealand Clinical Trials Registry (ANZCTR). Post-haemorrhoidectomy Pain and Metronidazole Trial. Trial ID: ACTRN12619000735156. 2019. Status: Completed. Available from: <https://www.anzctr.org.au/Trial/Registration/TrialReview.aspx?id=377543&isReview=true> [Accessed 11 August 2020].
- 634 Australian New Zealand Clinical Trials Registry (ANZCTR). Impact of a New Zealand berry fruit product on lung health and immunological status of individuals living in urban China. Trial ID: ACTRN12619001736134p. 2019. Status: Not Yet Recruiting. Available from: <https://www.anzctr.org.au/Trial/Registration/TrialReview.aspx?id=378795&isReview=true> [Accessed 11 August 2020].
- 635 Australian New Zealand Clinical Trials Registry (ANZCTR). Do foam dressings prevent pressure sores? Trial ID: ACTRN12619000763145p. 2019. Status: Not Yet Recruiting. Available from: <https://www.anzctr.org.au/Trial/Registration/TrialReview.aspx?id=377447&isReview=true> [Accessed 11 August 2020].
- 636 Australian New Zealand Clinical Trials Registry (ANZCTR). COLONiC: Consequences of OLive Oil replacemenNt on ulcerative Colitis. Trial ID: ACTRN12619000150145. 2019. Status: Not Yet Recruiting. Available from: <https://www.anzctr.org.au/Trial/Registration/TrialReview.aspx?id=375208&isReview=true> [Accessed 11 August 2020].
- 637 Australian New Zealand Clinical Trials Registry (ANZCTR). Lyophilised Oral Faecal Microbiota Transplantation in the Management of Ulcerative Colitis -(LOTUS Study). Trial ID: ACTRN12619000611123. 2019. Status: Not Yet Recruiting. Available from: <https://www.anzctr.org.au/Trial/Registration/TrialReview.aspx?id=377325&isReview=true> [Accessed 11 August 2020].
- 638 Australian New Zealand Clinical Trials Registry (ANZCTR). Effectiveness of Yoga and Pilates Training for Urinary Incontinence in Elderly Women: A Clinical Trial. Trial ID: ACTRN12619000784112. 2019. Status: Not Yet Recruiting. Available from: <https://www.anzctr.org.au/Trial/Registration/TrialReview.aspx?id=377388&isReview=true> [Accessed 11 August 2020].
- 639 Clinical Research Information Service (CRIS). Safety and Efficacy of LOw Volum bowel preparation for Elderly. Trial ID: KCT0004224. 2019. Status: Recruiting. Available from: [https://cris.nih.go.kr/cris/en/search/search\\_result\\_st01.jsp?seq=15820](https://cris.nih.go.kr/cris/en/search/search_result_st01.jsp?seq=15820) [Accessed 11 August 2020].
- 640 Clinical Research Information Service (CRIS). A Clinical Trial to Evaluate the Efficacy and Safety of Anti-adhesive Agent INTERGUARD in Abdominal Surgery. Trial ID: KCT0005062. 2019. Status: Recruiting. Available from: [https://cris.nih.go.kr/cris/en/search/search\\_result\\_st01.jsp?seq=14314](https://cris.nih.go.kr/cris/en/search/search_result_st01.jsp?seq=14314) [Accessed 11 August 2020].
- 641 Clinical Trials Registry - India (CTRI). Comparing a new generation airway device called Baska mask with a normal tube that passes through the windpipe in preventing the blood trickling into the windpipe and contaminating the airway during elective nasal surgeries. Trial ID: CTRI/2019/06/019724. 2019. Status: Not Available. Available from: <http://ctri.nic.in/Clinicaltrials/pmaindet2.php?trialid=33928> [Accessed 11 August 2020].
- 642 Clinical Trials Registry - India (CTRI). Jirakadyarishta in the treatment of Grahani (Irritable Bowel Syndrome). Trial ID: CTRI/2019/08/020763. 2019. Status: Not Available. Available from: <http://ctri.nic.in/Clinicaltrials/pmaindet2.php?trialid=35637> [Accessed 11 August 2020].
- 643 Clinical Trials Registry - India (CTRI). A clinical trial comparing two different surgeries done for the treatment of hemorrhoidectomy. Trial ID: CTRI/2019/08/020781. 2019. Status: Not Available. Available from: <http://ctri.nic.in/Clinicaltrials/pmaindet2.php?trialid=32068> [Accessed 11 August 2020].
- 644 Clinical Trials Registry - India (CTRI). Use Of Parpatadyarishta in the management of Prostate growth related urinary incontinence. Trial ID: CTRI/2019/05/019230. 2019. Status: Not Available. Available from: <http://ctri.nic.in/Clinicaltrials/pmaindet2.php?trialid=33890> [Accessed 11 August 2020].
- 645 Clinical Trials Registry - India (CTRI). Bowel training through bowel wash procedure and bowel maintenance schedule. Trial ID: CTRI/2019/07/020287. 2019. Status: Not Available. Available from: <http://ctri.nic.in/Clinicaltrials/pmaindet2.php?trialid=34095> [Accessed 11 August 2020].
- 646 Clinical Trials Registry - India (CTRI). A Study to Determine the Effect of AztreonamAvibactam for the Treatment of Serious Infections Due to Resistant (MBLproducing) Gram Negative Bacteria. Trial ID: CTRI/2019/06/019884. 2019. Status: Not Yet Recruiting. Available from: <http://ctri.nic.in/Clinicaltrials/pmaindet2.php?trialid=29298> [Accessed 11 August 2020].

- 647 Clinicaltrials.gov. Lower-Dose Chemoradiation in Treating Patients With Early-Stage Anal Cancer- the DECREASE Study. Trial ID: NCT04166318. 2019. Status: Recruiting. Available from: <https://clinicaltrials.gov/ct2/show/record/NCT04166318> [Accessed 11 August 2020].
- 648 Clinicaltrials.gov. Drainage Seton With Flap Versus EAS Preserving Seton in Treatment of Transsphincteric Anal Fistula. Trial ID: NCT03983174. 2019. Status: Completed. Available from: <https://clinicaltrials.gov/ct2/show/record/NCT03983174> [Accessed 11 August 2020].
- 649 Clinicaltrials.gov. Laser Closure of Anal Fistula (FiLaC). Trial ID: NCT04161469. 2019. Status: Recruiting. Available from: <https://clinicaltrials.gov/ct2/show/record/NCT04161469> [Accessed 11 August 2020].
- 650 Clinicaltrials.gov. Yield of Diagnostic Tests and Effects of Crofelemer for Chronic Idiopathic Diarrhea In Non-HIV Patients. Trial ID: NCT03898856. 2019. Status: Not Yet Recruiting. Available from: <https://clinicaltrials.gov/ct2/show/record/NCT03898856> [Accessed 11 August 2020].
- 651 Clinicaltrials.gov. Efficacy and Safety of Vibrant Capsule vs. Placebo for the Treatment of Chronic Idiopathic Constipation (Vibrant). Trial ID: NCT03879239. 2019. Status: Not Yet Recruiting. Available from: <https://clinicaltrials.gov/ct2/show/record/NCT03879239> [Accessed 11 August 2020].
- 652 Clinicaltrials.gov. Measures to Increase the Effectiveness of Fast Track Colorectal Clinics for Iron Deficiency Anaemia. Trial ID: NCT03988712. 2019. Status: Completed. Available from: <https://clinicaltrials.gov/ct2/show/record/NCT03988712> [Accessed 11 August 2020].
- 653 Clinicaltrials.gov. The Problem of Colorectal Anastomosis Safety (ANSCRS). Trial ID: NCT03958500. 2019. Status: Recruiting. Available from: <https://clinicaltrials.gov/ct2/show/record/NCT03958500> [Accessed 11 August 2020].
- 654 Clinicaltrials.gov. The Use of Osmotic Laxatives Versus Macrogol for Bowel Preparation in Patients Undergoing Colonoscopy (CLEAN). Trial ID: NCT04225793. 2019. Status: Recruiting. Available from: <https://clinicaltrials.gov/ct2/show/record/NCT04225793> [Accessed 11 August 2020].
- 655 Clinicaltrials.gov. Understanding Mechanisms of Normal and Disordered Defecation. Trial ID: NCT03842007. 2019. Status: Recruiting. Available from: <https://clinicaltrials.gov/ct2/show/record/NCT03842007> [Accessed 11 August 2020].
- 656 Clinicaltrials.gov. Efficacy and Safety of PEG 3350 for Treatment of Chronic Constipation. Trial ID: NCT03957668. 2019. Status: Not Yet Recruiting. Available from: <https://clinicaltrials.gov/ct2/show/record/NCT03957668> [Accessed 11 August 2020].
- 657 Clinicaltrials.gov. The Association Between Calretinin and the Function of Ganglion Cells in Hirschsprung Disease. Trial ID: NCT04149093. 2019. Status: Not Yet Recruiting. Available from: <https://clinicaltrials.gov/ct2/show/record/NCT04149093> [Accessed 11 August 2020].
- 658 Clinicaltrials.gov. Implantation of a Pudendal PNA Test Lead for Neuromodulation by the ENTRAMI Technique in Case of Chronic Perineal Pain Syndrome. Trial ID: NCT03880786. 2019. Status: Recruiting. Available from: <https://clinicaltrials.gov/ct2/show/record/NCT03880786> [Accessed 11 August 2020].
- 659 Clinicaltrials.gov. Transanal Total Mesorectal Excision Versus Robotic Total Mesorectal Excision (TaRo). Trial ID: NCT04091620. 2019. Status: Recruiting. Available from: <https://clinicaltrials.gov/ct2/show/record/NCT04091620> [Accessed 11 August 2020].
- 660 Clinicaltrials.gov. TNT Versus Conventional CRT to Increase the Sphincter Preservation Rate for Distal LARC (TESS). Trial ID: NCT03840239. 2019. Status: Recruiting. Available from: <https://clinicaltrials.gov/ct2/show/record/NCT03840239> [Accessed 11 August 2020].
- 661 Clinicaltrials.gov. Effects of Crofelemer on the Gut Microbiome in Healthy Volunteers and in HIV+ Patients With Non-Infectious Diarrhea. Trial ID: NCT04192487. 2019. Status: Recruiting. Available from: <https://clinicaltrials.gov/ct2/show/record/NCT04192487> [Accessed 11 August 2020].
- 662 Clinicaltrials.gov. A Phase of Injection for Recombinant Human Tissue Plasminogen Kinase Derivative in Treatment of Acute Ischemic Stroke. Trial ID: NCT04028518. 2019. Status: Not Yet Recruiting. Available from: <https://clinicaltrials.gov/ct2/show/record/NCT04028518> [Accessed 11 August 2020].
- 663 Clinicaltrials.gov. Anlotinib Hydrochloride Combined With Sintilimab Injection in the Treatment of Advanced Hepatocellular Carcinoma (HCC). Trial ID: NCT04052152. 2019. Status: Recruiting. Available from: <https://clinicaltrials.gov/ct2/show/record/NCT04052152> [Accessed 11 August 2020].
- 664 Clinicaltrials.gov. Combination Treatment (Talazoparib Plus Avelumab) for Stage IV or Recurrent Non-Squamous Non-Small Cell Lung Cancer With STK11 Gene Mutation (A LUNG-MAP Treatment Trial). Trial ID: NCT04173507. 2019. Status: Not Yet Recruiting. Available from: <https://clinicaltrials.gov/ct2/show/record/NCT04173507> [Accessed 11 August 2020].

- 665 Clinicaltrials.gov. Ipilimumab and Nivolumab in Combination With Radiation Therapy in Treating Patients With Stage 2-3 Non-small Lung Cancer. Trial ID: NCT04013542. 2019. Status: Recruiting. Available from: <https://clinicaltrials.gov/ct2/show/record/NCT04013542> [Accessed 11 August 2020].
- 666 Clinicaltrials.gov. Monocentric Feasibility Study for a New Medical Device for the Treatment of Anal Fissure With Botulinum Toxin. Trial ID: NCT04173130. 2019. Status: Recruiting. Available from: <https://clinicaltrials.gov/ct2/show/record/NCT04173130> [Accessed 11 August 2020].
- 667 Clinicaltrials.gov. Marsupialization of Anal Fistulotomy Wound Accelerates Healing and Decreases Post Operative Pain. Trial ID: NCT04155905. 2019. Status: Completed. Available from: <https://clinicaltrials.gov/ct2/show/record/NCT04155905> [Accessed 11 August 2020].
- 668 Clinicaltrials.gov. THREE-row Circular STAPLER in Low Anterior Resection for Rectal Cancer (THREESTAPLER). Trial ID: NCT03910699. 2019. Status: Recruiting. Available from: <https://clinicaltrials.gov/ct2/show/record/NCT03910699> [Accessed 11 August 2020].
- 669 Clinicaltrials.gov. Effect of Multimodal Opioid-free Anesthesia on Return of Bowel Function in Laparoscopic Colorectal Surgery (RUMBLE). Trial ID: NCT04144933. 2019. Status: Not Yet Recruiting. Available from: <https://clinicaltrials.gov/ct2/show/record/NCT04144933> [Accessed 11 August 2020].
- 670 Clinicaltrials.gov. Immunotherapy (Nivolumab or Brentuximab Vedotin) Plus Combination Chemotherapy in Treating Patients With Newly Diagnosed Stage III-IV Classic Hodgkin Lymphoma. Trial ID: NCT03907488. 2019. Status: Recruiting. Available from: <https://clinicaltrials.gov/ct2/show/record/NCT03907488> [Accessed 11 August 2020].
- 671 Clinicaltrials.gov. Nurse-led Antimicrobial Stewardship Intervention to Increase Antibiotic Appropriateness in Residential Aged Care Facilities. Trial ID: NCT03941509. 2019. Status: Recruiting. Available from: <https://clinicaltrials.gov/ct2/show/record/NCT03941509> [Accessed 11 August 2020].
- 672 Clinicaltrials.gov. The Effects of Topical Corticosteroid Use on Insulin Sensitivity and Bone Turnover. Trial ID: NCT04114097. 2019. Status: Recruiting. Available from: <https://clinicaltrials.gov/ct2/show/record/NCT04114097> [Accessed 11 August 2020].
- 673 Clinicaltrials.gov. Efficacy- Safety- and Tolerability Study of Oral Full-Spectrum MicrobiotaTM (CP101) in Subjects With Autism Spectrum Disorder and Associated GI Symptoms (SPROUT) (SPROUT). Trial ID: NCT03829878. 2019. Status: Not Yet Recruiting. Available from: <https://clinicaltrials.gov/ct2/show/record/NCT03829878> [Accessed 11 August 2020].
- 674 Clinicaltrials.gov. Pharmacokinetics of Rivaroxaban After Bariatric Surgery (ABSORB). Trial ID: NCT04180436. 2019. Status: Recruiting. Available from: <https://clinicaltrials.gov/ct2/show/record/NCT04180436> [Accessed 11 August 2020].
- 675 Clinicaltrials.gov. Intracavitary Injection of hUMSCs in Acute Basal Ganglia Hematoma After Stereotactic Aspiration. Trial ID: NCT04074408. 2019. Status: Not Yet Recruiting. Available from: <https://clinicaltrials.gov/ct2/show/record/NCT04074408> [Accessed 11 August 2020].
- 676 Clinicaltrials.gov. De-intensified Radiation Therapy With Chemotherapy (Cisplatin) or Immunotherapy (Nivolumab) in Treating Patients With Early-Stage- HPV-Positive- Non-Smoking Associated Oropharyngeal Cancer. Trial ID: NCT03952585. 2019. Status: Recruiting. Available from: <https://clinicaltrials.gov/ct2/show/record/NCT03952585> [Accessed 11 August 2020].
- 677 Clinicaltrials.gov. The Effectiveness of Core Stability Exercises (CORE). Trial ID: NCT03975985. 2019. Status: Recruiting. Available from: <https://clinicaltrials.gov/ct2/show/record/NCT03975985> [Accessed 11 August 2020].
- 678 Clinicaltrials.gov. A Pilot Trial of Preoperative Oral Probiotics (RBX7455). Trial ID: NCT04139993. 2019. Status: Not Yet Recruiting. Available from: <https://clinicaltrials.gov/ct2/show/record/NCT04139993> [Accessed 11 August 2020].
- 679 Clinicaltrials.gov. Effects of Modified Pilates Exercises on Body Control- Gait and Function in Children With Cerebral Palsy. Trial ID: NCT04035954. 2019. Status: Recruiting. Available from: <https://clinicaltrials.gov/ct2/show/record/NCT04035954> [Accessed 11 August 2020].
- 680 Clinicaltrials.gov. Investigation of Parents' Anxiety Level and Health Related Quality of Life in Different Types of Physical Disabilities. Trial ID: NCT04035967. 2019. Status: Completed. Available from: <https://clinicaltrials.gov/ct2/show/record/NCT04035967> [Accessed 11 August 2020].
- 681 Clinicaltrials.gov. High Dose Multiple Site Injection of Botox Versus Lateral Sphincterotomy in Chronic Analfissure (professor). Trial ID: NCT04166175. 2019. Status: Completed. Available from: <https://clinicaltrials.gov/ct2/show/record/NCT04166175> [Accessed 11 August 2020].

- 682 Clinicaltrials.gov. Muscle Function After Intensive Care. Trial ID: NCT03922113. 2019. Status: Completed. Available from: <https://clinicaltrials.gov/ct2/show/record/NCT03922113> [Accessed 11 August 2020].
- 683 Clinicaltrials.gov. Anorectal Function in Perianal Crohn's Disease. Trial ID: NCT03819257. 2019. Status: Completed. Available from: <https://clinicaltrials.gov/ct2/show/record/NCT03819257> [Accessed 11 August 2020].
- 684 Clinicaltrials.gov. Oral Administration of MB-102 Versus Dual Sugar Testing for Gut Permeability. Trial ID: NCT03962998. 2019. Status: Recruiting. Available from: <https://clinicaltrials.gov/ct2/show/record/NCT03962998> [Accessed 11 August 2020].
- 685 Clinicaltrials.gov. Biomarkers of Intestinal Fibrosis in Small Bowel Crohn's Disease. Trial ID: NCT04088773. 2019. Status: Not Yet Recruiting. Available from: <https://clinicaltrials.gov/ct2/show/record/NCT04088773> [Accessed 11 August 2020].
- 686 Clinicaltrials.gov. The ADDapt Diet in Reducing Crohn's Disease Inflammation. Trial ID: NCT04046913. 2019. Status: Recruiting. Available from: <https://clinicaltrials.gov/ct2/show/record/NCT04046913> [Accessed 11 August 2020].
- 687 Clinicaltrials.gov. Effect of Acupuncture on Patients With Crohn's Disease in Remission. Trial ID: NCT04211129. 2019. Status: Recruiting. Available from: <https://clinicaltrials.gov/ct2/show/record/NCT04211129> [Accessed 11 August 2020].
- 688 Clinicaltrials.gov. Adipose Tissue Injection in Perianal Fistulas in Crohn's Disease. Trial ID: NCT03904212. 2019. Status: Recruiting. Available from: <https://clinicaltrials.gov/ct2/show/record/NCT03904212> [Accessed 11 August 2020].
- 689 Clinicaltrials.gov. Special Physical Exercises as a Therapeutic Intervention for Inflammatory Bowel Disease. Trial ID: NCT04303260. 2019. Status: Recruiting. Available from: <https://clinicaltrials.gov/ct2/show/record/NCT04303260> [Accessed 11 August 2020].
- 690 Clinicaltrials.gov. Safety and Efficacy of Fecal Microbiota Transplantation. Trial ID: NCT04014413. 2019. Status: Not Yet Recruiting. Available from: <https://clinicaltrials.gov/ct2/show/record/NCT04014413> [Accessed 11 August 2020].
- 691 Clinicaltrials.gov. Effectiveness of a Physical Activity Intervention for Pre-frail Older Adults With Chronic Pain. Trial ID: NCT04045535. 2019. Status: Completed. Available from: <https://clinicaltrials.gov/ct2/show/record/NCT04045535> [Accessed 11 August 2020].
- 692 Clinicaltrials.gov. Effectiveness of Aquatic Exercises for Improving Mental and Physical Health in Adults. (AEforMH). Trial ID: NCT04100850. 2019. Status: Recruiting. Available from: <https://clinicaltrials.gov/ct2/show/record/NCT04100850> [Accessed 11 August 2020].
- 693 Clinicaltrials.gov. Frequency Specific Microcurrent for the Treatment of Diastasis Recti. Trial ID: NCT04060563. 2019. Status: Recruiting. Available from: <https://clinicaltrials.gov/ct2/show/record/NCT04060563> [Accessed 11 August 2020].
- 694 Clinicaltrials.gov. Bowel Function/QoL After Elective Sigmoidectomy vs. Conservative Management for Recurrent Uncomplicated Diverticulitis. Trial ID: NCT03994978. 2019. Status: Recruiting. Available from: <https://clinicaltrials.gov/ct2/show/record/NCT03994978> [Accessed 11 August 2020].
- 695 Clinicaltrials.gov. Mechanistic Characterization of Uterine Pain (MCUP). Trial ID: NCT04145518. 2019. Status: Recruiting. Available from: <https://clinicaltrials.gov/ct2/show/record/NCT04145518> [Accessed 11 August 2020].
- 696 Clinicaltrials.gov. Translational Research in Pelvic Pain (TRiPP). Trial ID: NCT04001244. 2019. Status: Recruiting. Available from: <https://clinicaltrials.gov/ct2/show/record/NCT04001244> [Accessed 11 August 2020].
- 697 Clinicaltrials.gov. The Impact of NOSE-colectomy on Fertility and Quality of Life Among Patients With Colorectal Endometriosis (NOSERES). Trial ID: NCT04109378. 2019. Status: Recruiting. Available from: <https://clinicaltrials.gov/ct2/show/record/NCT04109378> [Accessed 11 August 2020].
- 698 Clinicaltrials.gov. Dabrafenib and Trametinib in Treating Patients With Erdheim Chester Disease With BRAF V600 Mutations. Trial ID: NCT03794297. 2019. Status: Recruiting. Available from: <https://clinicaltrials.gov/ct2/show/record/NCT03794297> [Accessed 11 August 2020].
- 699 Clinicaltrials.gov. Epigenetic Regulation in Fibrous Dysplasia of Bone: mirDYS Study. (MirDYS). Trial ID: NCT03838991. 2019. Status: Recruiting. Available from: <https://clinicaltrials.gov/ct2/show/record/NCT03838991> [Accessed 11 August 2020].
- 700 Clinicaltrials.gov. Complex Treatment of a Chronic Anal Fissure. Trial ID: NCT03855046. 2019. Status: Recruiting. Available from: <https://clinicaltrials.gov/ct2/show/record/NCT03855046> [Accessed 11 August 2020].

- 701 Clinicaltrials.gov. Fistulotomy With Marsupialization Versus Fistulectomy With Wound Sutures in Simple Anal Fistula. Trial ID: NCT04215718. 2019. Status: Completed. Available from: <https://clinicaltrials.gov/ct2/show/record/NCT04215718> [Accessed 11 August 2020].
- 702 Clinicaltrials.gov. The Efficacy and Safety of 'BST104' (Lonicera Flos Extract) in Mild to Moderate Functional Dyspepsia Subjects. Trial ID: NCT04008901. 2019. Status: Completed. Available from: <https://clinicaltrials.gov/ct2/show/record/NCT04008901> [Accessed 11 August 2020].
- 703 Clinicaltrials.gov. Gut-microbiota Targeted Nutritional Intervention for Gut Barrier Integrity at High Altitude. Trial ID: NCT04111263. 2019. Status: Recruiting. Available from: <https://clinicaltrials.gov/ct2/show/record/NCT04111263> [Accessed 11 August 2020].
- 704 Clinicaltrials.gov. A First-in-human Phase Ia/b- Open Label- Multicentre- Dose Escalation Study of BI 905711 in Patients With Advanced Gastrointestinal Cancers. Trial ID: NCT04137289. 2019. Status: Not Yet Recruiting. Available from: <https://clinicaltrials.gov/ct2/show/record/NCT04137289> [Accessed 11 August 2020].
- 705 Clinicaltrials.gov. A Clinical Trial to Evaluate the Chronic Safety and Tolerance of Turmipure Gold in Healthy Subjects (TURBIO-GOLD). Trial ID: NCT03945149. 2019. Status: Recruiting. Available from: <https://clinicaltrials.gov/ct2/show/record/NCT03945149> [Accessed 11 August 2020].
- 706 Clinicaltrials.gov. Study of the IgA Repertoire During IgA Deposition Nephropathy. (ERINA). Trial ID: NCT04092491. 2019. Status: Not Yet Recruiting. Available from: <https://clinicaltrials.gov/ct2/show/record/NCT04092491> [Accessed 11 August 2020].
- 707 Clinicaltrials.gov. RIGHTWHEY - Responders In Gut Health Markers Using Fermented WHEY (RIGHTWHEY). Trial ID: NCT03844152. 2019. Status: Recruiting. Available from: <https://clinicaltrials.gov/ct2/show/record/NCT03844152> [Accessed 11 August 2020].
- 708 Clinicaltrials.gov. A Trial to Investigate the Safety- Tolerability- and Drug Levels in Blood After Single and Multiple Doses of LEO 32731 in Healthy People. Trial ID: NCT03812198. 2019. Status: Completed. Available from: <https://clinicaltrials.gov/ct2/show/record/NCT03812198> [Accessed 11 August 2020].
- 709 Clinicaltrials.gov. A Study Investigating the Effect of Floradapt Mature Immune Defense on Nutrient Uptake and Digestive Health in a Healthy Elderly Population. Trial ID: NCT04147923. 2019. Status: Recruiting. Available from: <https://clinicaltrials.gov/ct2/show/record/NCT04147923> [Accessed 11 August 2020].
- 710 Clinicaltrials.gov. Cerebral Cortical Influences on Autonomic Function. Trial ID: NCT03869372. 2019. Status: Recruiting. Available from: <https://clinicaltrials.gov/ct2/show/record/NCT03869372> [Accessed 11 August 2020].
- 711 Clinicaltrials.gov. Mass Balance and Pharmacokinetics Study of Derazantinib in Healthy Male Subjects. Trial ID: NCT04098692. 2019. Status: Recruiting. Available from: <https://clinicaltrials.gov/ct2/show/record/NCT04098692> [Accessed 11 August 2020].
- 712 Clinicaltrials.gov. Napoleon Trial: Optimal Treatment for Recurrent Haemorrhoidal Disease. Trial ID: NCT04101773. 2019. Status: Not Yet Recruiting. Available from: <https://clinicaltrials.gov/ct2/show/record/NCT04101773> [Accessed 11 August 2020].
- 713 Clinicaltrials.gov. Ligasure Hemorrhoidectomy Versus Open Hemorrhoidectomy. Trial ID: NCT04139876. 2019. Status: Recruiting. Available from: <https://clinicaltrials.gov/ct2/show/record/NCT04139876> [Accessed 11 August 2020].
- 714 Clinicaltrials.gov. Study of Binimetinib With Encorafenib in Adults With Recurrent BRAF V600-Mutated HGG (BRAF). Trial ID: NCT03973918. 2019. Status: Recruiting. Available from: <https://clinicaltrials.gov/ct2/show/record/NCT03973918> [Accessed 11 August 2020].
- 715 Clinicaltrials.gov. Safety and Pharmacokinetic Study of Tenofovir Alafenamide (TAF)/Elvitegravir (EVC) Administered Rectally. Trial ID: NCT04047420. 2019. Status: Recruiting. Available from: <https://clinicaltrials.gov/ct2/show/record/NCT04047420> [Accessed 11 August 2020].
- 716 Clinicaltrials.gov. Tenofovir Rectal Douche to Prevent HIV Transmission (DREAM-03). Trial ID: NCT04016233. 2019. Status: Recruiting. Available from: <https://clinicaltrials.gov/ct2/show/record/NCT04016233> [Accessed 11 August 2020].
- 717 Clinicaltrials.gov. Evaluating Distribution of a Tenofovir Douche With Tap Water Douching and Simulated Receptive Anal Intercourse (DREAM-02). Trial ID: NCT04195776. 2019. Status: Not Yet Recruiting. Available from: <https://clinicaltrials.gov/ct2/show/record/NCT04195776> [Accessed 11 August 2020].
- 718 Clinicaltrials.gov. Exercise- Hypertension- and Gut Dysbiosis in African Americans. Trial ID: NCT03897777. 2019. Status: Not Yet Recruiting. Available from: <https://clinicaltrials.gov/ct2/show/record/NCT03897777> [Accessed 11 August 2020].



- 719 Clinicaltrials.gov. Fluorescence Imaging of Disease Activity in IBD and Rheumatoid Arthritis Using OTL38 (AVIATOR). Trial ID: NCT03938701. 2019. Status: Not Yet Recruiting. Available from: <https://clinicaltrials.gov/ct2/show/record/NCT03938701> [Accessed 11 August 2020].
- 720 Clinicaltrials.gov. Irritable Bowel Syndrome and Control Volunteers: Diet Challenge. Trial ID: NCT03983434. 2019. Status: Recruiting. Available from: <https://clinicaltrials.gov/ct2/show/record/NCT03983434> [Accessed 11 August 2020].
- 721 Clinicaltrials.gov. Stool Testing With Molecular Assay to Minimize Contact Precautions. Trial ID: NCT04189874. 2019. Status: Recruiting. Available from: <https://clinicaltrials.gov/ct2/show/record/NCT04189874> [Accessed 11 August 2020].
- 722 Clinicaltrials.gov. Evaluation of the Safety and Effectiveness of Switching From Humira to Imraldi in Flanders (Safe-OrBi). Trial ID: NCT04045782. 2019. Status: Recruiting. Available from: <https://clinicaltrials.gov/ct2/show/record/NCT04045782> [Accessed 11 August 2020].
- 723 Clinicaltrials.gov. The Role of the Pregnane X Receptor (PXR) in Indole Signaling and Intestinal Permeability in Inflammatory Bowel Disease. Trial ID: NCT04089501. 2019. Status: Completed. Available from: <https://clinicaltrials.gov/ct2/show/record/NCT04089501> [Accessed 11 August 2020].
- 724 Clinicaltrials.gov. Inflammatory Bowel Disease Tracker (IBD Tracker) (IBDTr). Trial ID: NCT03953794. 2019. Status: Not Yet Recruiting. Available from: <https://clinicaltrials.gov/ct2/show/record/NCT03953794> [Accessed 11 August 2020].
- 725 Clinicaltrials.gov. IBD Registry in a Sub-Saharan African Population. Trial ID: NCT04178408. 2019. Status: Not Yet Recruiting. Available from: <https://clinicaltrials.gov/ct2/show/record/NCT04178408> [Accessed 11 August 2020].
- 726 Clinicaltrials.gov. Effect of Acupuncture on Mild to Moderate Active Crohn's Disease. Trial ID: NCT04187820. 2019. Status: Recruiting. Available from: <https://clinicaltrials.gov/ct2/show/record/NCT04187820> [Accessed 11 August 2020].
- 727 Clinicaltrials.gov. Marine Protein Hydrolysate as Dietary Supplement in Irritable Bowel Syndrome (MPH\_IBS). Trial ID: NCT03801057. 2019. Status: Completed. Available from: <https://clinicaltrials.gov/ct2/show/record/NCT03801057> [Accessed 11 August 2020].
- 728 Clinicaltrials.gov. Effectiveness of Probiotics Stabilized With Cryoprotection Technology in Patients With Irritable Bowel Syndrome. Trial ID: NCT04206410. 2019. Status: Completed. Available from: <https://clinicaltrials.gov/ct2/show/record/NCT04206410> [Accessed 11 August 2020].
- 729 Clinicaltrials.gov. A Novel Formulation of Bifidobacterium Longum BB536 and Lactobacillus Rhamnosus HN001 With Vitamin B6 on IBS Patients (LLB). Trial ID: NCT03815617. 2019. Status: Completed. Available from: <https://clinicaltrials.gov/ct2/show/record/NCT03815617> [Accessed 11 August 2020].
- 730 Clinicaltrials.gov. Long-term Safety of Linaclotide in Pediatric Participants With FC or IBS-C. Trial ID: NCT04166058. 2019. Status: Not Yet Recruiting. Available from: <https://clinicaltrials.gov/ct2/show/record/NCT04166058> [Accessed 11 August 2020].
- 731 Clinicaltrials.gov. A Comparison of the Effects of ORP-101 Versus Placebo in Adult Patients With Irritable Bowel Syndrome With Diarrhea (IBS-D). Trial ID: NCT04129619. 2019. Status: Not Yet Recruiting. Available from: <https://clinicaltrials.gov/ct2/show/record/NCT04129619> [Accessed 11 August 2020].
- 732 Clinicaltrials.gov. G-PUR for Symptomatic Treatment in Irritable Bowel Syndrome With Diarrhea. Trial ID: NCT04138186. 2019. Status: Recruiting. Available from: <https://clinicaltrials.gov/ct2/show/record/NCT04138186> [Accessed 11 August 2020].
- 733 Clinicaltrials.gov. P-POSSUM Score and Length of Stay. Trial ID: NCT03933137. 2019. Status: Completed. Available from: <https://clinicaltrials.gov/ct2/show/record/NCT03933137> [Accessed 11 August 2020].
- 734 Clinicaltrials.gov. Study of Erectile Dysfunction- Urinary Incontinence and Related QoL After TOOKAD VTP for Low Risk Prostate Cancer. Trial ID: NCT03849365. 2019. Status: Recruiting. Available from: <https://clinicaltrials.gov/ct2/show/record/NCT03849365> [Accessed 11 August 2020].
- 735 Clinicaltrials.gov. Acalabrutinib-Lenalidomide-Rituximab in Patients With Untreated MCL. Trial ID: NCT03863184. 2019. Status: Recruiting. Available from: <https://clinicaltrials.gov/ct2/show/record/NCT03863184> [Accessed 11 August 2020].
- 736 Clinicaltrials.gov. Identification and Treatment Of Micrometastatic Disease in Stage III Colon Cancer. Trial ID: NCT03803553. 2019. Status: Recruiting. Available from: <https://clinicaltrials.gov/ct2/show/record/NCT03803553> [Accessed 11 August 2020].



- 737 Clinicaltrials.gov. Efficacy and Safety of Oral Rifaximin in Patients With Active Microscopic Colitis. Trial ID: NCT04043897. 2019. Status: Recruiting. Available from: <https://clinicaltrials.gov/ct2/show/record/NCT04043897> [Accessed 11 August 2020].
- 738 Clinicaltrials.gov. Trial of Erythrocyte Encapsulated Thymidine Phosphorylase In Mitochondrial Neurogastrointestinal Encephalomyopathy (TEETPIM). Trial ID: NCT03866954. 2019. Status: Not Yet Recruiting. Available from: <https://clinicaltrials.gov/ct2/show/record/NCT03866954> [Accessed 11 August 2020].
- 739 Clinicaltrials.gov. Role of MRI Defecography in Diagnosis of Obstructed Defecation Syndrome. Trial ID: NCT03841006. 2019. Status: Not Yet Recruiting. Available from: <https://clinicaltrials.gov/ct2/show/record/NCT03841006> [Accessed 11 August 2020].
- 740 Clinicaltrials.gov. S1803- Daratumumab/rHuPh20 +/- Lenalidomide as Post-ASCT Maintenance for MM w/MRD to Direct Therapy Duration (DRAMMATIC). Trial ID: NCT04071457. 2019. Status: Recruiting. Available from: <https://clinicaltrials.gov/ct2/show/record/NCT04071457> [Accessed 11 August 2020].
- 741 Clinicaltrials.gov. Oral FMT (Fecal Microbial Transplant) in Subjects With Multiple Sclerosis. Trial ID: NCT04096443. 2019. Status: Recruiting. Available from: <https://clinicaltrials.gov/ct2/show/record/NCT04096443> [Accessed 11 August 2020].
- 742 Clinicaltrials.gov. Reliability and Validity of Glittre Activities Of Daily Living (ADL) Test in Multiple Sclerosis Patients. Trial ID: NCT04182269. 2019. Status: Completed. Available from: <https://clinicaltrials.gov/ct2/show/record/NCT04182269> [Accessed 11 August 2020].
- 743 Clinicaltrials.gov. Prebiotic vs Probiotic in Multiple Sclerosis (MS). Trial ID: NCT04038541. 2019. Status: Recruiting. Available from: <https://clinicaltrials.gov/ct2/show/record/NCT04038541> [Accessed 11 August 2020].
- 744 Clinicaltrials.gov. PTNS on Urinary and Global Quality of Life in MS Patients (PTNSinMS). Trial ID: NCT04063852. 2019. Status: Recruiting. Available from: <https://clinicaltrials.gov/ct2/show/record/NCT04063852> [Accessed 11 August 2020].
- 745 Clinicaltrials.gov. Pudendal Nerve Block in Vaginal Surgery. Trial ID: NCT04198714. 2019. Status: Recruiting. Available from: <https://clinicaltrials.gov/ct2/show/record/NCT04198714> [Accessed 11 August 2020].
- 746 Clinicaltrials.gov. Effects of Different Bread Types in NCGS (BREAD). Trial ID: NCT04084470. 2019. Status: Recruiting. Available from: <https://clinicaltrials.gov/ct2/show/record/NCT04084470> [Accessed 11 August 2020].
- 747 Clinicaltrials.gov. Activity of Lorlatinib Based on ALK Resistance Mutations Detected on Blood in ALK Positive NSCLC Patients (ALKALINE). Trial ID: NCT04127110. 2019. Status: Not Yet Recruiting. Available from: <https://clinicaltrials.gov/ct2/show/record/NCT04127110> [Accessed 11 August 2020].
- 748 Clinicaltrials.gov. Environmental Health Effects on Your Physiology (HYPHY). Trial ID: NCT03986814. 2019. Status: Recruiting. Available from: <https://clinicaltrials.gov/ct2/show/record/NCT03986814> [Accessed 11 August 2020].
- 749 Clinicaltrials.gov. Investigating the Possible Link Between Habitual Diet- Physical Activity- Sleeping Patterns- Obesity Status and Age With Gut Bacterial Composition- Gut Barrier Function- Metabolic Endotoxemia- Systemic Inflammation and Glycaemic Control. Trial ID: NCT03864107. 2019. Status: Recruiting. Available from: <https://clinicaltrials.gov/ct2/show/record/NCT03864107> [Accessed 11 August 2020].
- 750 Clinicaltrials.gov. Prostate-cancer Treatment Using Stereotactic Radiotherapy for Oligometastases Ablation in Hormone-sensitive Patients (PRESTO). Trial ID: NCT04115007. 2019. Status: Not Yet Recruiting. Available from: <https://clinicaltrials.gov/ct2/show/record/NCT04115007> [Accessed 11 August 2020].
- 751 Clinicaltrials.gov. Effect of Opioid Free Anesthetic on Post-Operative Opioid Consumption After Laparoscopic Bariatric Surgery. Trial ID: NCT04081545. 2019. Status: Not Yet Recruiting. Available from: <https://clinicaltrials.gov/ct2/show/record/NCT04081545> [Accessed 11 August 2020].
- 752 Clinicaltrials.gov. Epigenetic Regulation of Osteogenesis Imperfecta Severity : miROI Study (miROI). Trial ID: NCT04009733. 2019. Status: Recruiting. Available from: <https://clinicaltrials.gov/ct2/show/record/NCT04009733> [Accessed 11 August 2020].
- 753 Clinicaltrials.gov. Effect of Time-restricted Eating on Behaviour and Metabolism in Overweight Individuals at High Risk of Type 2 Diabetes (RESET). Trial ID: NCT03854656. 2019. Status: Recruiting. Available from: <https://clinicaltrials.gov/ct2/show/record/NCT03854656> [Accessed 11 August 2020].
- 754 Clinicaltrials.gov. Modified Atkins Diet for Overweight and Obesity. Trial ID: NCT04207879. 2019. Status: Not Yet Recruiting. Available from: <https://clinicaltrials.gov/ct2/show/record/NCT04207879> [Accessed 11 August 2020].
- 755 Clinicaltrials.gov. the Effect of Doctor-nurse-patient Cooperative Analgesic Linkage Program on Movement Evoked Pain. Trial ID: NCT03823846. 2019. Status: Recruiting. Available from: <https://clinicaltrials.gov/ct2/show/record/NCT03823846> [Accessed 11 August 2020].

- 756 Clinicaltrials.gov. Study Evaluating NEOadjuvant Immunotherapy in Resectable PANcreatic Ductal Adenocarcinoma (NEOiPANC). Trial ID: NCT03979066. 2019. Status: Recruiting. Available from: <https://clinicaltrials.gov/ct2/show/record/NCT03979066> [Accessed 11 August 2020].
- 757 Clinicaltrials.gov. Fixed-Dose Trial in Early Parkinson's Disease (PD) (TEMPO-1). Trial ID: NCT04201093. 2019. Status: Recruiting. Available from: <https://clinicaltrials.gov/ct2/show/record/NCT04201093> [Accessed 11 August 2020].
- 758 Clinicaltrials.gov. the Effects of a Nursing Trauma Care Bundle. Trial ID: NCT04077541. 2019. Status: Not Yet Recruiting. Available from: <https://clinicaltrials.gov/ct2/show/record/NCT04077541> [Accessed 11 August 2020].
- 759 Clinicaltrials.gov. ERAS vs Conventional Approach in Peptic Perforation-RCT (ERASE). Trial ID: NCT04194060. 2019. Status: Recruiting. Available from: <https://clinicaltrials.gov/ct2/show/record/NCT04194060> [Accessed 11 August 2020].
- 760 Clinicaltrials.gov. Perianal Fistula Treatment With Autologous Adipose Tissue Injection. Trial ID: NCT03913910. 2019. Status: Recruiting. Available from: <https://clinicaltrials.gov/ct2/show/record/NCT03913910> [Accessed 11 August 2020].
- 761 Clinicaltrials.gov. Probiotic (LGG) for Veterans With PTSD. Trial ID: NCT04150380. 2019. Status: Not Yet Recruiting. Available from: <https://clinicaltrials.gov/ct2/show/record/NCT04150380> [Accessed 11 August 2020].
- 762 Clinicaltrials.gov. A Study to Evaluate the Efficacy and Safety of 2 Dose Regimens of Intravenous TAK-954 for the Prophylaxis and Treatment of Postoperative Gastrointestinal Dysfunction in Participants Undergoing Large- and Small-Bowel Resection. Trial ID: NCT03827655. 2019. Status: Recruiting. Available from: <https://clinicaltrials.gov/ct2/show/record/NCT03827655> [Accessed 11 August 2020].
- 763 Clinicaltrials.gov. Extended Release Local Anesthetic for Postsurgical Pain After Posterior Colporrhaphy and Perineorrhaphy. Trial ID: NCT03875664. 2019. Status: Completed. Available from: <https://clinicaltrials.gov/ct2/show/record/NCT03875664> [Accessed 11 August 2020].
- 764 Clinicaltrials.gov. Cost-effectiveness Comparison Between Vaginal Versus Robotic Mesh Surgery for Apical Prolapse: Prospective- Cohort Study (KIDS). Trial ID: NCT03878056. 2019. Status: Recruiting. Available from: <https://clinicaltrials.gov/ct2/show/record/NCT03878056> [Accessed 11 August 2020].
- 765 Clinicaltrials.gov. Feasibility Study of PET-MRI/68Ga-PSMA Guidance of Focal Therapy by HIFU in Patients With Prostate Cancer Recurrence After Radiotherapy (PSMA). Trial ID: NCT03927521. 2019. Status: Not Yet Recruiting. Available from: <https://clinicaltrials.gov/ct2/show/record/NCT03927521> [Accessed 11 August 2020].
- 766 Clinicaltrials.gov. Single Fractions SBRT for Prostate Cancer. Trial ID: NCT04004312. 2019. Status: Recruiting. Available from: <https://clinicaltrials.gov/ct2/show/record/NCT04004312> [Accessed 11 August 2020].
- 767 Clinicaltrials.gov. Prostate Margin Reduction to Reduce Acute Rectal Toxicity (PROTRACT) (PROTRACT). Trial ID: NCT04004858. 2019. Status: Not Yet Recruiting. Available from: <https://clinicaltrials.gov/ct2/show/record/NCT04004858> [Accessed 11 August 2020].
- 768 Clinicaltrials.gov. INTREPId (INTermediate Risk Erection Preservation Trial). Trial ID: NCT04025372. 2019. Status: Not Yet Recruiting. Available from: <https://clinicaltrials.gov/ct2/show/record/NCT04025372> [Accessed 11 August 2020].
- 769 Clinicaltrials.gov. Study of Radiation Therapy in Combination With Darolutamide + Degarelix in Intermediate Risk Prostate Cancer (SchLAP/IDC). Trial ID: NCT04176081. 2019. Status: Not Yet Recruiting. Available from: <https://clinicaltrials.gov/ct2/show/record/NCT04176081> [Accessed 11 August 2020].
- 770 Clinicaltrials.gov. Validation of the Moroccan Arabic Version of the Low Anterior Resection Syndrome (LARS) and Wexner Score of Continence Among Rectal Cancer Patients (MA\_LARSWEX). Trial ID: NCT04128657. 2019. Status: Recruiting. Available from: <https://clinicaltrials.gov/ct2/show/record/NCT04128657> [Accessed 11 August 2020].
- 771 Clinicaltrials.gov. Patient Reported Outcomes After Surgery for Rectal Endometriosis (PROCURE). Trial ID: NCT04204707. 2019. Status: Recruiting. Available from: <https://clinicaltrials.gov/ct2/show/record/NCT04204707> [Accessed 11 August 2020].
- 772 Clinicaltrials.gov. Fecal Microbiota Transplantation (FMT) in Multiple Sclerosis. Trial ID: NCT03975413. 2019. Status: Active- Not Recruiting. Available from: <https://clinicaltrials.gov/ct2/show/record/NCT03975413> [Accessed 11 August 2020].
- 773 Clinicaltrials.gov. MRI Trial to exPlore the efficAcy and Safety of IMU-838 in Relapsing Remitting Multiple Sclerosis (EMPhASIS) (EMPhASIS). Trial ID: NCT03846219. 2019. Status: Recruiting. Available from: <https://clinicaltrials.gov/ct2/show/record/NCT03846219> [Accessed 11 August 2020].

- 774 Clinicaltrials.gov. Pirfenidone Capsule in Patients With Chronic Kidney Disease G2 and G3a Study on Safety and Pharmacokinetics. Trial ID: NCT04126538. 2019. Status: Recruiting. Available from: <https://clinicaltrials.gov/ct2/show/record/NCT04126538> [Accessed 11 August 2020].
- 775 Clinicaltrials.gov. Reproductive Axis Maturation in the Early Post-Menarchal Years. Trial ID: NCT03986021. 2019. Status: Recruiting. Available from: <https://clinicaltrials.gov/ct2/show/record/NCT03986021> [Accessed 11 August 2020].
- 776 Clinicaltrials.gov. A Study of the Efficacy- Safety and Tolerability of Enteric-Coated Cholestyramine Capsules for Adult Short Bowel Syndrome. Trial ID: NCT04046328. 2019. Status: Recruiting. Available from: <https://clinicaltrials.gov/ct2/show/record/NCT04046328> [Accessed 11 August 2020].
- 777 Clinicaltrials.gov. The Impact of Electroacupuncture on Clinical Effect-Brain Structural and Functional Changes on Spinal Cord Injury. Trial ID: NCT03909958. 2019. Status: Recruiting. Available from: <https://clinicaltrials.gov/ct2/show/record/NCT03909958> [Accessed 11 August 2020].
- 778 Clinicaltrials.gov. Standing- Stepping and Voluntary Movement Spinal Cord Epidural Stimulation. Trial ID: NCT04123847. 2019. Status: Recruiting. Available from: <https://clinicaltrials.gov/ct2/show/record/NCT04123847> [Accessed 11 August 2020].
- 779 Clinicaltrials.gov. Transcutaneous Tibial Nerve Stimulation in Acute Spinal Cord Injury (TASCI). Trial ID: NCT03965299. 2019. Status: Recruiting. Available from: <https://clinicaltrials.gov/ct2/show/record/NCT03965299> [Accessed 11 August 2020].
- 780 Clinicaltrials.gov. Spinal Cord Stimulation and Autonomic Response in People With SCI. Trial ID: NCT03924388. 2019. Status: Not Yet Recruiting. Available from: <https://clinicaltrials.gov/ct2/show/record/NCT03924388> [Accessed 11 August 2020].
- 781 Clinicaltrials.gov. Evaluation of Safety and Performance of the Atalante System With Patients With Lower Limb Paralysis. Trial ID: NCT04110561. 2019. Status: Completed. Available from: <https://clinicaltrials.gov/ct2/show/record/NCT04110561> [Accessed 11 August 2020].
- 782 Clinicaltrials.gov. Duke Spine Outcome Study (DSOS) (DSOS). Trial ID: NCT04217525. 2019. Status: Recruiting. Available from: <https://clinicaltrials.gov/ct2/show/record/NCT04217525> [Accessed 11 August 2020].
- 783 Clinicaltrials.gov. Study of Nivolumab for Non-Small Cell Lung Cancer (Stage III) Following Neoadjuvant Chemotherapy Plus Nivolumab and Definitive Concurrent Chemoradiation Therapy. Trial ID: NCT04085250. 2019. Status: Not Yet Recruiting. Available from: <https://clinicaltrials.gov/ct2/show/record/NCT04085250> [Accessed 11 August 2020].
- 784 Clinicaltrials.gov. BTL Emsella Chair Versus Sham for the Treatment of Stress Urinary Incontinence. Trial ID: NCT04133675. 2019. Status: Not Yet Recruiting. Available from: <https://clinicaltrials.gov/ct2/show/record/NCT04133675> [Accessed 11 August 2020].
- 785 Clinicaltrials.gov. Aquatic Exercise and Stroke. Trial ID: NCT03957421. 2019. Status: Active- Not Recruiting. Available from: <https://clinicaltrials.gov/ct2/show/record/NCT03957421> [Accessed 11 August 2020].
- 786 Clinicaltrials.gov. SaeboGlove Therapy for Severe Upper Limb Disability and Severe Hand Impairment After Stroke (SUSHI). Trial ID: NCT04007315. 2019. Status: Not Yet Recruiting. Available from: <https://clinicaltrials.gov/ct2/show/record/NCT04007315> [Accessed 11 August 2020].
- 787 Clinicaltrials.gov. CHinese Acute Tissue-Based Imaging Selection for Lysis In Stroke -Tenecteplase (CHABLIS-T). Trial ID: NCT04086147. 2019. Status: Not Yet Recruiting. Available from: <https://clinicaltrials.gov/ct2/show/record/NCT04086147> [Accessed 11 August 2020].
- 788 Clinicaltrials.gov. BRAIN-CONNECTS: Intensive Rehabilitation Program for Subacute Stroke Patients in an Inpatient Rehabilitation Facility. Trial ID: NCT04191109. 2019. Status: Not Yet Recruiting. Available from: <https://clinicaltrials.gov/ct2/show/record/NCT04191109> [Accessed 11 August 2020].
- 789 Clinicaltrials.gov. Prognostic Value for Predicting Outcome Using Functional Near-infrared Spectroscopy in Stroke Rehabilitation. Trial ID: NCT04288414. 2019. Status: Recruiting. Available from: <https://clinicaltrials.gov/ct2/show/record/NCT04288414> [Accessed 11 August 2020].
- 790 Clinicaltrials.gov. Nociceptive Flexor Reflex and Antispastic Treatments. Trial ID: NCT03860662. 2019. Status: Not Yet Recruiting. Available from: <https://clinicaltrials.gov/ct2/show/record/NCT03860662> [Accessed 11 August 2020].
- 791 Clinicaltrials.gov. Post-stroke Pathway: Analysis and Link With One Year Sequelae in a French Cohort of Stroke Patients (PAPAS PA). Trial ID: NCT03865173. 2019. Status: Recruiting. Available from: <https://clinicaltrials.gov/ct2/show/record/NCT03865173> [Accessed 11 August 2020].

- 792 Clinicaltrials.gov. Belimumab and Rituximab Combination Therapy for the Treatment of Diffuse Cutaneous Systemic Sclerosis. Trial ID: NCT03844061. 2019. Status: Recruiting. Available from: <https://clinicaltrials.gov/ct2/show/record/NCT03844061> [Accessed 11 August 2020].
- 793 Clinicaltrials.gov. Living Well- Dying Well. A Research Programme to Support Living Until the End (iLIVE). Trial ID: NCT04271085. 2019. Status: Not Yet Recruiting. Available from: <https://clinicaltrials.gov/ct2/show/record/NCT04271085> [Accessed 11 August 2020].
- 794 Clinicaltrials.gov. Thrombosed External Hemorrhoids: Comparison of the Thrombectomy and Local Excision Procedures in Terms of Results and Outcome (TEH) (TEH). Trial ID: NCT03903536. 2019. Status: Not Yet Recruiting. Available from: <https://clinicaltrials.gov/ct2/show/record/NCT03903536> [Accessed 11 August 2020].
- 795 Clinicaltrials.gov. Study to Evaluate Safety and Efficacy of Rifamycin SV MMX in the Treatment of Traveler's Diarrhea in Children Age 6 to 11 Years. Trial ID: NCT04026984. 2019. Status: Not Yet Recruiting. Available from: <https://clinicaltrials.gov/ct2/show/record/NCT04026984> [Accessed 11 August 2020].
- 796 Clinicaltrials.gov. Study to Evaluate Safety and Efficacy of Rifamycin SV MMX in the Treatment of Traveler's Diarrhea in Children Age 12 to 17 Years. Trial ID: NCT04027894. 2019. Status: Not Yet Recruiting. Available from: <https://clinicaltrials.gov/ct2/show/record/NCT04027894> [Accessed 11 August 2020].
- 797 Clinicaltrials.gov. Tubeless NOSES Versus Laparoscopic Radical Resection for Rectosigmoid Cancers (CORNER). Trial ID: NCT04037956. 2019. Status: Recruiting. Available from: <https://clinicaltrials.gov/ct2/show/record/NCT04037956> [Accessed 11 August 2020].
- 798 Clinicaltrials.gov. Phase 2a Study to Evaluate the Safety and Efficacy of PH100 Tablet in T2DM Patients With Recent Cardiovascular (PH100\_IIa). Trial ID: NCT04141241. 2019. Status: Completed. Available from: <https://clinicaltrials.gov/ct2/show/record/NCT04141241> [Accessed 11 August 2020].
- 799 Clinicaltrials.gov. Progression of Damage in Ulcerative Colitis (PRODUC). Trial ID: NCT03955328. 2019. Status: Not Yet Recruiting. Available from: <https://clinicaltrials.gov/ct2/show/record/NCT03955328> [Accessed 11 August 2020].
- 800 Clinicaltrials.gov. Investigation of the Faecal Loss of Vedolizumab and Its Role in Influencing Serum Drug Levels- Outcomes and Response in Ulcerative Colitis (FAVOUR). Trial ID: NCT04006080. 2019. Status: Recruiting. Available from: <https://clinicaltrials.gov/ct2/show/record/NCT04006080> [Accessed 11 August 2020].
- 801 Clinicaltrials.gov. Neuspera's Implantable Sacral Nerve Stimulation System in Patients With Symptoms of Overactive Bladder. Trial ID: NCT04232696. 2019. Status: Recruiting. Available from: <https://clinicaltrials.gov/ct2/show/record/NCT04232696> [Accessed 11 August 2020].
- 802 Clinicaltrials.gov. Cabozantinib in Patients With Locally Advanced or Metastatic Urothelial Cell Carcinoma. (CabUC). Trial ID: NCT04066595. 2019. Status: Recruiting. Available from: <https://clinicaltrials.gov/ct2/show/record/NCT04066595> [Accessed 11 August 2020].
- 803 Clinicaltrials.gov. 0050-19-RMB CTIL - VNOTES Compared to VH for Vaginal Apex Prolapse. Trial ID: NCT04078802. 2019. Status: Not Yet Recruiting. Available from: <https://clinicaltrials.gov/ct2/show/record/NCT04078802> [Accessed 11 August 2020].
- 804 Clinicaltrials.gov. Intraperitoneal and Extraperitoneal Uterosacral Ligament Suspensions for Post-Hysterectomy Vaginal Vault Prolapse. Trial ID: NCT04172896. 2019. Status: Recruiting. Available from: <https://clinicaltrials.gov/ct2/show/record/NCT04172896> [Accessed 11 August 2020].
- 805 Clinicaltrials.gov. Impact of Bariatric Surgery in Patients With Morbid Obesity (IVBIA). Trial ID: NCT04009356. 2019. Status: Recruiting. Available from: <https://clinicaltrials.gov/ct2/show/record/NCT04009356> [Accessed 11 August 2020].
- 806 Clinicaltrials.gov. Indirect Non-invasive Evaluation of Pudendal Neuropathy. Trial ID: NCT03933683. 2019. Status: Active- Not Recruiting. Available from: <https://clinicaltrials.gov/ct2/show/record/NCT03933683> [Accessed 11 August 2020].
- 807 Clinicaltrials.gov. Mind Over Matter: Electronic Bladder and Bowel Continence Self-management Program. Trial ID: NCT03976414. 2019. Status: Recruiting. Available from: <https://clinicaltrials.gov/ct2/show/record/NCT03976414> [Accessed 11 August 2020].
- 808 Clinicaltrials.gov. ePRO for Adjuvant Therapy of Gastric and Colorectal Adenocarcinoma. Trial ID: NCT04069455. 2019. Status: Not Yet Recruiting. Available from: <https://clinicaltrials.gov/ct2/show/record/NCT04069455> [Accessed 11 August 2020].
- 809 Clinicaltrials.gov. Evaluation of Safety and Efficacy of the Apyx Device for the Repair of Pelvic Organ Prolapse (POP). Trial ID: NCT03991455. 2019. Status: Recruiting. Available from: <https://clinicaltrials.gov/ct2/show/record/NCT03991455> [Accessed 11 August 2020].

- 810 EU Clinical Trials Register. OBADIAH-2: A randomised- double-blind- placebo-controlled trial of two doses of obeticholic acid and placebo in patients with primary bile acid diarrhoea; OBADIAH-2 version 0.9. Trial ID: 2019-001531-32/GB. 2019. Status: Ongoing. Available from: <https://www.clinicaltrialsregister.eu/ctr-search/trial/2019-001531-32/GB> [Accessed 11 August 2020].
- 811 EU Clinical Trials Register. A Phase IIa- Proof of Concept- Randomized- Double-Blind- Dose-Finding- Cross-Over Study of the Efficacy- Safety and Tolerability of a New Enteric-Coated Cholestyramine Capsule in Adult Short Bowel Syndrome Patients. Trial ID: 2018-004419-32/PL. 2019. Status: Ongoing. Available from: <https://www.clinicaltrialsregister.eu/ctr-search/trial/2018-004419-32/PL> [Accessed 11 August 2020].
- 812 EU Clinical Trials Register. ADAPT-PO; A Phase 3- Randomized- Double-blind- Double-dummy- Multicenter- Prospective Study to Assess the Efficacy- Safety and Pharmacokinetics of Orally Administered Tebipenem Pivoxil Hydrobromide (SPR994) Compared to Intravenous Ertapenem in Patients with Complicated Urinary Tract Infection (cUTI) or Acute Pyelonephritis (AP). Trial ID: 2018-003671-35/BG. 2019. Status: Ongoing. Available from: <https://www.clinicaltrialsregister.eu/ctr-search/trial/2018-003671-35/BG> [Accessed 11 August 2020].
- 813 EU Clinical Trials Register. Randomized- double-blind- placebo-controlled- multi-centre trial to evaluate the efficacy- safety and tolerability of oral treatment with living bacteria of *E. coli* DSM 17252 (Symbioflor 2) in patients with diarrhoea-predominant irritable bowel syndrome (IBS-D) Randomisierte- doppelblinde- placebokontrollierte- multizentrische Studie zur Beurteilung der Wirksamkeit- Sicherheit und Verträglichkeit der oralen Behandlung mit Bakterienkonzentrat aus *E. coli*-Bakterien DSM 17252 (Symbioflor 2) bei Patienten mit Reizdarmsyndrom assoziiert mit Durchfall (RDS-D). Trial ID: 2018-004626-28/DE. 2019. Status: Ongoing. Available from: <https://www.clinicaltrialsregister.eu/ctr-search/trial/2018-004626-28/DE> [Accessed 11 August 2020].
- 814 EU Clinical Trials Register. Establishing the Safety and Efficacy of Reloxaliase (Oxalate Decarboxylase) in Patients with Enteric Hyperoxaluria: A Phase III Randomized- Double-Blind- Placebo-Controlled Study (URIROX-2) Nachweis der Sicherheit und Wirksamkeit von Reloxaliase (Oxalat-Decarboxylase) bei Patienten mit enteraler Hyperoxalurie: Eine randomisierte- doppelblinde- placebokontrollierte Phase-3-Studie (URIROX-2 ). Trial ID: 2018-000921-29/GB. 2019. Status: Ongoing. Available from: <https://www.clinicaltrialsregister.eu/ctr-search/trial/2018-000921-29/GB> [Accessed 11 August 2020].
- 815 EU Clinical Trials Register. Oral Fosfomycin versus Ciprofloxacin for Febrile Urinary Tract Infection in Men: a pilot study; FOS-MEN. Trial ID: 2017-004963-11/NL. 2019. Status: Ongoing. Available from: <https://www.clinicaltrialsregister.eu/ctr-search/trial/2017-004963-11/NL> [Accessed 11 August 2020].
- 816 EU Clinical Trials Register. Pilot Project for the Treatment of Perianal Disease through the Local Injection of Remsima Guided by Ultrasound. Number of cases. Proyecto Piloto del Tratamiento de la Enfermedad Perianal Mediante la Inyección Local de Remsima Guiada por Ecografía. Serie de Casos. Trial ID: 2019-000668-27/ES. 2019. Status: Ongoing. Available from: <https://www.clinicaltrialsregister.eu/ctr-search/trial/2019-000668-27/ES> [Accessed 11 August 2020].
- 817 ISRCTN Registry. Improving bowel preparation for colonoscopy with the use of an educational video. Trial ID: ISRCTN20368092. 2019. Status: Completed. Available from: <http://www.isrctn.com/ISRCTN20368092> [Accessed 11 August 2020].
- 818 ISRCTN Registry. Yorkshire Cancer Research Bowel Cancer Improvement Program. Trial ID: ISRCTN15907802. 2019. Status: Recruiting. Available from: <http://www.isrctn.com/ISRCTN15907802> [Accessed 11 August 2020].
- 819 ISRCTN Registry. The BD Odon Device for assisted vaginal birth. Trial ID: ISRCTN38829082. 2019. Status: Recruiting. Available from: <http://www.isrctn.com/ISRCTN38829082> [Accessed 11 August 2020].
- 820 ISRCTN Registry. NED: APRIQOT study of performance feedback emailed to endoscopists and endoscopy unit lead clinicians through the National Endoscopy Database (NED) on the endoscopists' detection of polyps. Trial ID: ISRCTN11126923. 2019. Status: Ongoing. Available from: <http://www.isrctn.com/ISRCTN11126923> [Accessed 11 August 2020].
- 821 ISRCTN Registry. The ADDapt diet in reducing Crohn's disease inflammation. Trial ID: ISRCTN14054186. 2019. Status: Recruiting. Available from: <http://www.isrctn.com/ISRCTN14054186> [Accessed 11 August 2020].
- 822 ISRCTN Registry. Patient experience of transitioning between two brands of adalimumab (Humira and a biosimilar Imraldi) in the treatment of adults with Crohn's disease. Trial ID: ISRCTN11094929. 2019. Status: Recruiting. Available from: <http://www.isrctn.com/ISRCTN11094929> [Accessed 11 August 2020].
- 823 ISRCTN Registry. The effect of abdominal massage applied on term newborns receiving phototherapy on transcutaneous bilirubin level. Trial ID: ISRCTN27769096. 2019. Status: Recruiting. Available from: <http://www.isrctn.com/ISRCTN27769096> [Accessed 11 August 2020].



- 824 ISRCTN Registry. Role of AHT#1 food supplement in symptom control of IBS-D. Trial ID: ISRCTN15346028. 2019. Status: Completed. Available from: <http://www.isrctn.com/ISRCTN15346028> [Accessed 11 August 2020].
- 825 ISRCTN Registry. A supported online self-management for symptoms of fatigue- pain and urgency/incontinence in people with inflammatory bowel disease: the IBD-BOOST trial. Trial ID: ISRCTN71618461. 2019. Status: Recruiting. Available from: <http://www.isrctn.com/ISRCTN71618461> [Accessed 11 August 2020].
- 826 ISRCTN Registry. Retrospective chart review study of umbilical cord stem cell therapy for stroke. Trial ID: ISRCTN10678357. 2019. Status: Completed. Available from: <http://www.isrctn.com/ISRCTN10678357> [Accessed 11 August 2020].
- 827 ISRCTN Registry. Pulling forces involved with forceps delivery and its association with maternal injury during birth. Trial ID: ISRCTN18126471. 2019. Status: Recruiting. Available from: <http://www.isrctn.com/ISRCTN18126471> [Accessed 11 August 2020].
- 828 ISRCTN Registry. A study investigating whether hyoscine butylbromide improves image quality of computed tomography (CT) when giving stereotactic ablative radiotherapy (SABR) in the abdomen and pelvis. Trial ID: ISRCTN24362767. 2019. Status: Recruiting. Available from: <http://www.isrctn.com/ISRCTN24362767> [Accessed 11 August 2020].
- 829 ISRCTN Registry. CHRONOS: Comparative health research outcomes of novel surgery in prostate cancer. Trial ID: ISRCTN17796995. 2019. Status: Recruiting. Available from: <http://www.isrctn.com/ISRCTN17796995> [Accessed 11 August 2020].
- 830 ISRCTN Registry. Mobilising vitamin D sequestered in adipose tissue in humans with Exercise (VitaDEx). Trial ID: ISRCTN29195046. 2019. Status: Recruiting. Available from: <http://www.isrctn.com/ISRCTN29195046> [Accessed 11 August 2020].
- 831 UMIN Clinical Trials Registry (UMIN-CTR). Efficacy and feasibility study of the cognitive behavioral therapy program with psychoeducational videos for irritable bowel syndrome. Trial ID: UMIN000036327. 2019. Status: Active- Not Recruiting. Available from: [https://upload.umin.ac.jp/cgi-open-bin/ctr\\_e/ctr\\_view.cgi?recptno=R000041376](https://upload.umin.ac.jp/cgi-open-bin/ctr_e/ctr_view.cgi?recptno=R000041376) [Accessed 11 August 2020].
- 832 Australian New Zealand Clinical Trials Registry (ANZCTR). Prevention of opioid-associated constipation in ventilated intensive care patients. Trial ID: ACTRN12620000207910. 2020. Status: Not Yet Recruiting. Available from: <https://www.anzctr.org.au/Trial/Registration/TrialReview.aspx?id=377536&isReview=true> [Accessed 11 August 2020].
- 833 Australian New Zealand Clinical Trials Registry (ANZCTR). The impact of assessing and treating bile acid malabsorption on function and quality of life in patients with major Low Anterior Resection Syndrome (LARS). Trial ID: ACTRN12620000755932. 2020. Status: Not Yet Recruiting. Available from: <https://www.anzctr.org.au/Trial/Registration/TrialReview.aspx?id=379868&isReview=true> [Accessed 11 August 2020].
- 834 Australian New Zealand Clinical Trials Registry (ANZCTR). Botulinum toxin for the treatment of anal fistulae - a double blinded randomized trial. Trial ID: ACTRN12620000094976. 2020. Status: Not Yet Recruiting. Available from: <https://www.anzctr.org.au/Trial/Registration/TrialReview.aspx?id=378980&isReview=true> [Accessed 11 August 2020].
- 835 Australian New Zealand Clinical Trials Registry (ANZCTR). A randomized controlled study of gut health and Fibre-fix in people with IBS who are on a low FODMAP diet. Trial ID: ACTRN12620000032954. 2020. Status: Not Yet Recruiting. Available from: <https://www.anzctr.org.au/Trial/Registration/TrialReview.aspx?id=378610&isReview=true> [Accessed 11 August 2020].
- 836 Australian New Zealand Clinical Trials Registry (ANZCTR). The Healthy Optimal Australian Microbiome (HOAM) Study. Trial ID: ACTRN12620000106932. 2020. Status: Not Yet Recruiting. Available from: <https://www.anzctr.org.au/Trial/Registration/TrialReview.aspx?id=378844&isReview=true> [Accessed 11 August 2020].
- 837 Clinical Research Information Service (CRIS). Safety and Efficacy of Oral Sulfate Tablet in Patients with Inflammatory Bowel Disease. Trial ID: KCT0004685. 2020. Status: Not Yet Recruiting. Available from: [https://cris.nih.go.kr/cris/en/search/search\\_result\\_st01.jsp?seq=15786](https://cris.nih.go.kr/cris/en/search/search_result_st01.jsp?seq=15786) [Accessed 11 August 2020].
- 838 Clinical Research Information Service (CRIS). Infectious surgical site complications after oral antibiotic bowel preparation for minimally-invasive rectal cancer surgery. Trial ID: KCT0004822. 2020. Status: Recruiting. Available from: [https://cris.nih.go.kr/cris/en/search/search\\_result\\_st01.jsp?seq=15964](https://cris.nih.go.kr/cris/en/search/search_result_st01.jsp?seq=15964) [Accessed 11 August 2020].



- 839 Clinical Trials Registry - India (CTRI). Effect of Darvyadi lauha in the management of Kamala with respect to Hepatocellular jaundice. Trial ID: CTRI/2020/02/023545. 2020. Status: Not Available. Available from: <http://ctri.nic.in/Clinicaltrials/pmaindet2.php?trialid=41504> [Accessed 11 August 2020].
- 840 Clinical Trials Registry - India (CTRI). Comparison of acute toxicities and clinical outcome in locally advanced cervical cancer patients treated with two different radiation techniques. Trial ID: CTRI/2020/03/023923. 2020. Status: Not Available. Available from: <http://ctri.nic.in/Clinicaltrials/pmaindet2.php?trialid=41089> [Accessed 11 August 2020].
- 841 Clinical Trials Registry - India (CTRI). TESTING PATIENTS CONTROL OVER FLATUS- LIQUID OR SOLID STOOL. Trial ID: CTRI/2020/02/023604. 2020. Status: Not Available. Available from: <http://ctri.nic.in/Clinicaltrials/pmaindet2.php?trialid=40830> [Accessed 11 August 2020].
- 842 Clinicaltrials.gov. Efficacy and Safety of Vibrant Capsule vs. Vibrant Placebo for the Treatment of Chronic Idiopathic Constipation (CIC) (CIC). Trial ID: NCT04458675. 2020. Status: Completed. Available from: <https://clinicaltrials.gov/ct2/show/record/NCT04458675> [Accessed 11 August 2020].
- 843 Clinicaltrials.gov. ERAS Program Items Adherence- PROMs and RIOT After Colorectal Surgery (iCra3). Trial ID: NCT04397627. 2020. Status: Not Yet Recruiting. Available from: <https://clinicaltrials.gov/ct2/show/record/NCT04397627> [Accessed 11 August 2020].
- 844 Clinicaltrials.gov. Effect of an 8-week Bifidobacterium Lactis HN019 Supplementation on Functional Constipation (BifidoDigest). Trial ID: NCT04231162. 2020. Status: Not Yet Recruiting. Available from: <https://clinicaltrials.gov/ct2/show/record/NCT04231162> [Accessed 11 August 2020].
- 845 Clinicaltrials.gov. Evaluation of the Effect of Changyou Probiotic Flavored Yogurt on Intestinal Health. Trial ID: NCT04375475. 2020. Status: Completed. Available from: <https://clinicaltrials.gov/ct2/show/record/NCT04375475> [Accessed 11 August 2020].
- 846 Clinicaltrials.gov. The Effect of Kinesio Taping and Breathing Exercises on Pain Management. Trial ID: NCT04412122. 2020. Status: Completed. Available from: <https://clinicaltrials.gov/ct2/show/record/NCT04412122> [Accessed 11 August 2020].
- 847 Clinicaltrials.gov. SERum-bank for PANcreatic Cancer (SERPAN). Trial ID: NCT04374175. 2020. Status: Recruiting. Available from: <https://clinicaltrials.gov/ct2/show/record/NCT04374175> [Accessed 11 August 2020].
- 848 Clinicaltrials.gov. Durvalumab for Advanced Hepatocellular Carcinoma in Patients With Active Chronic Hepatitis B Virus Infection. Trial ID: NCT04294498. 2020. Status: Not Yet Recruiting. Available from: <https://clinicaltrials.gov/ct2/show/record/NCT04294498> [Accessed 11 August 2020].
- 849 Clinicaltrials.gov. Abemaciclib With or Without T-DM1 for the Treatment of HER2-Positive Metastatic Breast Cancer. Trial ID: NCT04351230. 2020. Status: Not Yet Recruiting. Available from: <https://clinicaltrials.gov/ct2/show/record/NCT04351230> [Accessed 11 August 2020].
- 850 Clinicaltrials.gov. Neurovascular Complications and White Matter Damage in Acquired Anemias. Trial ID: NCT04320966. 2020. Status: Not Yet Recruiting. Available from: <https://clinicaltrials.gov/ct2/show/record/NCT04320966> [Accessed 11 August 2020].
- 851 Clinicaltrials.gov. Anal Sphincter Reconstruction After High Recurrent Anorectal Fistula Excision. Trial ID: NCT04357210. 2020. Status: Completed. Available from: <https://clinicaltrials.gov/ct2/show/record/NCT04357210> [Accessed 11 August 2020].
- 852 Clinicaltrials.gov. The Impact of a Combination of Bifidobacterium Longum 35624 and 1714 Strains in Adults With Irritable Bowel Syndrome (IBS). Trial ID: NCT04422327. 2020. Status: Completed. Available from: <https://clinicaltrials.gov/ct2/show/record/NCT04422327> [Accessed 11 August 2020].
- 853 Clinicaltrials.gov. Dupilumab Skin Barrier Function Study in Atopic Dermatitis (BALISTAD). Trial ID: NCT04447417. 2020. Status: Not Yet Recruiting. Available from: <https://clinicaltrials.gov/ct2/show/record/NCT04447417> [Accessed 11 August 2020].
- 854 Clinicaltrials.gov. Acupuncture for the Treatment of Intravesical BCG-Related Adverse Events in High-Risk Non-muscle Invasive Bladder Cancer. Trial ID: NCT04496219. 2020. Status: Not Yet Recruiting. Available from: <https://clinicaltrials.gov/ct2/show/record/NCT04496219> [Accessed 11 August 2020].
- 855 Clinicaltrials.gov. Clinical Trial of Efficacy and Safety of MMH-MAP in the Treatment of Cognitive Disorders. Trial ID: NCT04295681. 2020. Status: Recruiting. Available from: <https://clinicaltrials.gov/ct2/show/record/NCT04295681> [Accessed 11 August 2020].
- 856 Clinicaltrials.gov. Austrian CoronaVirus Adaptive Clinical Trial (ACOVACT). Trial ID: NCT04351724. 2020. Status: Recruiting. Available from: <https://clinicaltrials.gov/ct2/show/record/NCT04351724> [Accessed 11 August 2020].

- 857 Clinicaltrials.gov. A Study to Evaluate the Impact of Care4Today IBD- a Smart System to Facilitate the Management of Crohn's Disease by Patients and Health Care Providers. Trial ID: NCT04232228. 2020. Status: Not Yet Recruiting. Available from: <https://clinicaltrials.gov/ct2/show/record/NCT04232228> [Accessed 11 August 2020].
- 858 Clinicaltrials.gov. High-impact Exercise in Adults With Crohn's Disease (IMPACT CD). Trial ID: NCT04273399. 2020. Status: Not Yet Recruiting. Available from: <https://clinicaltrials.gov/ct2/show/record/NCT04273399> [Accessed 11 August 2020].
- 859 Clinicaltrials.gov. 18F-FDG and 68Ga-FAPI PET/CT in Crohn's Disease. Trial ID: NCT04502303. 2020. Status: Not Yet Recruiting. Available from: <https://clinicaltrials.gov/ct2/show/record/NCT04502303> [Accessed 11 August 2020].
- 860 Clinicaltrials.gov. Investigation of Eluxadoline for Diabetic Diarrhea. Trial ID: NCT04313088. 2020. Status: Not Yet Recruiting. Available from: <https://clinicaltrials.gov/ct2/show/record/NCT04313088> [Accessed 11 August 2020].
- 861 Clinicaltrials.gov. Neoadjuvant Study Chemotherapy vs Letrozole + Abemaciclib in HR+/HER2- High/Intermediate Risk Breast Cancer Patients (CARABELA). Trial ID: NCT04293393. 2020. Status: Not Yet Recruiting. Available from: <https://clinicaltrials.gov/ct2/show/record/NCT04293393> [Accessed 11 August 2020].
- 862 Clinicaltrials.gov. De-escalated Conformal Radiation Expedited Sequentially With Chemotherapy for Endometrial Cancer (DeCRESCENDO). Trial ID: NCT04386993. 2020. Status: Not Yet Recruiting. Available from: <https://clinicaltrials.gov/ct2/show/record/NCT04386993> [Accessed 11 August 2020].
- 863 Clinicaltrials.gov. The Correlation Between Gut Microbiome-host Interaction and Ventricular Arrhythmias. Trial ID: NCT04447365. 2020. Status: Not Yet Recruiting. Available from: <https://clinicaltrials.gov/ct2/show/record/NCT04447365> [Accessed 11 August 2020].
- 864 Clinicaltrials.gov. Assessment of Changes in Vaginal Microbiota Profiles Before and After Vaginal Urogynecologic Surgery (VAGIBIOTE). Trial ID: NCT04301401. 2020. Status: Recruiting. Available from: <https://clinicaltrials.gov/ct2/show/record/NCT04301401> [Accessed 11 August 2020].
- 865 Clinicaltrials.gov. Dose-Escalated Hypofractionated Adaptive Radiotherapy for Head and Neck Cancer (DEHART). Trial ID: NCT04477759. 2020. Status: Not Yet Recruiting. Available from: <https://clinicaltrials.gov/ct2/show/record/NCT04477759> [Accessed 11 August 2020].
- 866 Clinicaltrials.gov. Stools and Life Habits Collection in Healthy Volunteers/Subjects - to Provide Material for in Vitro Model Development (PEPSIIN). Trial ID: NCT04301973. 2020. Status: Not Yet Recruiting. Available from: <https://clinicaltrials.gov/ct2/show/record/NCT04301973> [Accessed 11 August 2020].
- 867 Clinicaltrials.gov. ATHN Transcends: A Natural History Study of Non-Neoplastic Hematologic Disorders. Trial ID: NCT04398628. 2020. Status: Not Yet Recruiting. Available from: <https://clinicaltrials.gov/ct2/show/record/NCT04398628> [Accessed 11 August 2020].
- 868 Clinicaltrials.gov. Upper Extremity Robotic Rehabilitation in Patients With Hemiplegia. Trial ID: NCT04393480. 2020. Status: Completed. Available from: <https://clinicaltrials.gov/ct2/show/record/NCT04393480> [Accessed 11 August 2020].
- 869 Clinicaltrials.gov. Gut Butyrate and Blood Pressure in African Americans. Trial ID: NCT04415333. 2020. Status: Not Yet Recruiting. Available from: <https://clinicaltrials.gov/ct2/show/record/NCT04415333> [Accessed 11 August 2020].
- 870 Clinicaltrials.gov. The Effect of Joint Transition Visits on Quality of Life in Inflammatory Bowel Diseases (TRANS-IBD) (TRANS-IBD). Trial ID: NCT04290156. 2020. Status: Not Yet Recruiting. Available from: <https://clinicaltrials.gov/ct2/show/record/NCT04290156> [Accessed 11 August 2020].
- 871 Clinicaltrials.gov. Effect and Tolerance of a Probiotic-based Medical Device Administered to Patients With Irritable Bowel Syndrome (Lactiplus). Trial ID: NCT04324658. 2020. Status: Recruiting. Available from: <https://clinicaltrials.gov/ct2/show/record/NCT04324658> [Accessed 11 August 2020].
- 872 Clinicaltrials.gov. Impact of a Yoga Intervention on Pain and Multiomics in Participants With IBS. Trial ID: NCT04315714. 2020. Status: Not Yet Recruiting. Available from: <https://clinicaltrials.gov/ct2/show/record/NCT04315714> [Accessed 11 August 2020].
- 873 Clinicaltrials.gov. Efficacy and Safety of Changkang Granule in the Treatment of Diarrhea-predominant Irritable Bowel Syndrome (IBS-D). Trial ID: NCT04492787. 2020. Status: Recruiting. Available from: <https://clinicaltrials.gov/ct2/show/record/NCT04492787> [Accessed 11 August 2020].
- 874 Clinicaltrials.gov. Malnutrition in Chronic Gastrointestinal Diseases- Cross-sectional Study. Trial ID: NCT04474743. 2020. Status: Recruiting. Available from: <https://clinicaltrials.gov/ct2/show/record/NCT04474743> [Accessed 11 August 2020].

- 875 Clinicaltrials.gov. Lorlatinib Combinations in Lung Cancer. Trial ID: NCT04292119. 2020. Status: Not Yet Recruiting. Available from: <https://clinicaltrials.gov/ct2/show/record/NCT04292119> [Accessed 11 August 2020].
- 876 Clinicaltrials.gov. Testing of TAK228 (MLN0128- Sapanisertib) Plus Docetaxel to the Usual Standard of Care for Advanced Squamous Cell Lung Cancer (A Lung-MAP Treatment Trial). Trial ID: NCT04267913. 2020. Status: Not Yet Recruiting. Available from: <https://clinicaltrials.gov/ct2/show/record/NCT04267913> [Accessed 11 August 2020].
- 877 Clinicaltrials.gov. A Study of NIVO Plus IPI and Guadecitabine or NIVO Plus IPI in Melanoma and NSCLC Resistant to Anti-PD1/PDL1 (NIBIT-ML1). Trial ID: NCT04250246. 2020. Status: Not Yet Recruiting. Available from: <https://clinicaltrials.gov/ct2/show/record/NCT04250246> [Accessed 11 August 2020].
- 878 Clinicaltrials.gov. Testing the Addition of an Anti-cancer Immune Therapy Drug (Nivolumab) to the Usual Chemotherapy Treatment (Cisplatin or Carboplatin With Gemcitabine) for Recurrent or Metastatic Nasopharyngeal Cancer. Trial ID: NCT04458909. 2020. Status: Not Yet Recruiting. Available from: <https://clinicaltrials.gov/ct2/show/record/NCT04458909> [Accessed 11 August 2020].
- 879 Clinicaltrials.gov. Study to Assess Effectiveness of Therapy Timely Adjustment Based on Self-monitoring in Patients Suffering From Mild-to-moderate Ulcerative Colitis (OPTIMISE Study) (OPTIMISE). Trial ID: NCT04340895. 2020. Status: Recruiting. Available from: <https://clinicaltrials.gov/ct2/show/record/NCT04340895> [Accessed 11 August 2020].
- 880 Clinicaltrials.gov. Study of Multiple Ascending Dose of KBL693 in Healthy Participants. Trial ID: NCT04307173. 2020. Status: Not Yet Recruiting. Available from: <https://clinicaltrials.gov/ct2/show/record/NCT04307173> [Accessed 11 August 2020].
- 881 Clinicaltrials.gov. MOWOOT Device to Treat Constipation in Adults. Trial ID: NCT04262752. 2020. Status: Completed. Available from: <https://clinicaltrials.gov/ct2/show/record/NCT04262752> [Accessed 11 August 2020].
- 882 Clinicaltrials.gov. Study of Durvalumab Following Radiation Therapy in Patients With Stage 3 Unresectable NSCLC Ineligible for Chemotherapy (DUART). Trial ID: NCT04249362. 2020. Status: Not Yet Recruiting. Available from: <https://clinicaltrials.gov/ct2/show/record/NCT04249362> [Accessed 11 August 2020].
- 883 Clinicaltrials.gov. Flexible-Dose Trial in Early Parkinson's Disease (PD) (TEMPO-2). Trial ID: NCT04223193. 2020. Status: Recruiting. Available from: <https://clinicaltrials.gov/ct2/show/record/NCT04223193> [Accessed 11 August 2020].
- 884 Clinicaltrials.gov. Emsella Chair Versus Sham for the Treatment of Chronic Pelvic Pain (EmsellaPain). Trial ID: NCT04248491. 2020. Status: Recruiting. Available from: <https://clinicaltrials.gov/ct2/show/record/NCT04248491> [Accessed 11 August 2020].
- 885 Clinicaltrials.gov. Isatuximab in Combination With Lenalidomide and Dexamethasone in High-risk Smoldering Multiple Myeloma. Trial ID: NCT04270409. 2020. Status: Not Yet Recruiting. Available from: <https://clinicaltrials.gov/ct2/show/record/NCT04270409> [Accessed 11 August 2020].
- 886 Clinicaltrials.gov. Relevance of Ultrasound Screening for Foetal Macrosomia (USmacro). Trial ID: NCT04443205. 2020. Status: Not Yet Recruiting. Available from: <https://clinicaltrials.gov/ct2/show/record/NCT04443205> [Accessed 11 August 2020].
- 887 Clinicaltrials.gov. Enhancing Survivorship Care Planning for Patients With Localized Prostate Cancer Using A Couple-focused Web-based Tailored Symptom Self-management Program (SCP). Trial ID: NCT04350788. 2020. Status: Completed. Available from: <https://clinicaltrials.gov/ct2/show/record/NCT04350788> [Accessed 11 August 2020].
- 888 Clinicaltrials.gov. MRI-guided Focal Laser Ablation (Unicorn). Trial ID: NCT04379362. 2020. Status: Recruiting. Available from: <https://clinicaltrials.gov/ct2/show/record/NCT04379362> [Accessed 11 August 2020].
- 889 Clinicaltrials.gov. Genomics in Michigan to AdJust Outcomes in Prostate cancer (G-MAJOR) for Men With Newly Diagnosed Favorable Risk Prostate Cancer. Trial ID: NCT04396808. 2020. Status: Not Yet Recruiting. Available from: <https://clinicaltrials.gov/ct2/show/record/NCT04396808> [Accessed 11 August 2020].
- 890 Clinicaltrials.gov. Epidiolex (CBD) in Patients With Biochemically Recurrent Prostate Cancer. Trial ID: NCT04428203. 2020. Status: Not Yet Recruiting. Available from: <https://clinicaltrials.gov/ct2/show/record/NCT04428203> [Accessed 11 August 2020].
- 891 Clinicaltrials.gov. Development and Evaluation of a Web-based Programme on Relapse Management for People With Multiple Sclerosis (POWER@MS2). Trial ID: NCT04233970. 2020. Status: Not Yet Recruiting. Available from: <https://clinicaltrials.gov/ct2/show/record/NCT04233970> [Accessed 11 August 2020].

- 892 Clinicaltrials.gov. Investigation of Acute Effects of Myofascial Trigger Point Release in Women With Chronic Pelvic Pain. Trial ID: NCT04401566. 2020. Status: Active- Not Recruiting. Available from: <https://clinicaltrials.gov/ct2/show/record/NCT04401566> [Accessed 11 August 2020].
- 893 Clinicaltrials.gov. FMT as a Treatment for Severe Motility Disorder. Trial ID: NCT04373252. 2020. Status: Not Yet Recruiting. Available from: <https://clinicaltrials.gov/ct2/show/record/NCT04373252> [Accessed 11 August 2020].
- 894 Clinicaltrials.gov. Proof of Concept Study in Patients With Short Bowel Syndrome. Trial ID: NCT04379856. 2020. Status: Not Yet Recruiting. Available from: <https://clinicaltrials.gov/ct2/show/record/NCT04379856> [Accessed 11 August 2020].
- 895 Clinicaltrials.gov. Comparison of High-Dose Rate Brachytherapy and Stereotactic Ablative Radiotherapy as Monotherapy for the Treatment of Localized Prostate Cancer. Trial ID: NCT04253483. 2020. Status: Recruiting. Available from: <https://clinicaltrials.gov/ct2/show/record/NCT04253483> [Accessed 11 August 2020].
- 896 Clinicaltrials.gov. A Single-Blind- Randomized Study to Compare fCO2 Laser Therapy Versus Sham for Treatment of SUI in Women (LaserSUI). Trial ID: NCT04253067. 2020. Status: Not Yet Recruiting. Available from: <https://clinicaltrials.gov/ct2/show/record/NCT04253067> [Accessed 11 August 2020].
- 897 Clinicaltrials.gov. Evaluate Safety and Efficacy of Anaerobic Cultivated Human Intestinal Microbiome Transplantation in Systemic Sclerosis (ReSScue) Transplantation in Systemic Sclerosis (ReSScue). Trial ID: NCT04300426. 2020. Status: Not Yet Recruiting. Available from: <https://clinicaltrials.gov/ct2/show/record/NCT04300426> [Accessed 11 August 2020].
- 898 Clinicaltrials.gov. Upfront Autologous HSCT Versus Immunosuppression in Early Diffuse Cutaneous Systemic Sclerosis (UPSIDE). Trial ID: NCT04464434. 2020. Status: Not Yet Recruiting. Available from: <https://clinicaltrials.gov/ct2/show/record/NCT04464434> [Accessed 11 August 2020].
- 899 Clinicaltrials.gov. Ligation of Intersphincteric Track (LIFT) Versus Fistulectomy in Trans-sphincteric Anal Ffistula. (professor). Trial ID: NCT04351074. 2020. Status: Completed. Available from: <https://clinicaltrials.gov/ct2/show/record/NCT04351074> [Accessed 11 August 2020].
- 900 Clinicaltrials.gov. Study of OST-122 in Patients With Moderate to Severe Ulcerative Colitis. Trial ID: NCT04353791. 2020. Status: Not Yet Recruiting. Available from: <https://clinicaltrials.gov/ct2/show/record/NCT04353791> [Accessed 11 August 2020].
- 901 Clinicaltrials.gov. Boosting Biologics in UC. Trial ID: NCT04241029. 2020. Status: Recruiting. Available from: <https://clinicaltrials.gov/ct2/show/record/NCT04241029> [Accessed 11 August 2020].
- 902 Clinicaltrials.gov. Urinary Incontinence and Sedentary Behaviour in Nursing Homes (OsoNaH). Trial ID: NCT04297904. 2020. Status: Recruiting. Available from: <https://clinicaltrials.gov/ct2/show/record/NCT04297904> [Accessed 11 August 2020].
- 903 Clinicaltrials.gov. Gut Microbiome and Ventricular Arrhythmias. Trial ID: NCT04466072. 2020. Status: Not Yet Recruiting. Available from: <https://clinicaltrials.gov/ct2/show/record/NCT04466072> [Accessed 11 August 2020].
- 904 Clinicaltrials.gov. Digital Intelligent Assistant for Nursing Application (DIANA). Trial ID: NCT04393272. 2020. Status: Not Yet Recruiting. Available from: <https://clinicaltrials.gov/ct2/show/record/NCT04393272> [Accessed 11 August 2020].
- 905 Clinicaltrials.gov. Faecal Incontinence in Prostate Cancer Survivors Treated Whith Radiotherapy. Trial ID: NCT04262609. 2020. Status: Not Yet Recruiting. Available from: <https://clinicaltrials.gov/ct2/show/record/NCT04262609> [Accessed 11 August 2020].
- 906 Clinicaltrials.gov. Mediolateral Episiotomy and Obstetric Anal Sphincter Injuries in Instrumental Delivery (INSTRUMODA). Trial ID: NCT04446780. 2020. Status: Not Yet Recruiting. Available from: <https://clinicaltrials.gov/ct2/show/record/NCT04446780> [Accessed 11 August 2020].
- 907 ISRCTN Registry. The PLUG Study A Feasibility Study Investigating the Prevention of Post-operative Gastro-oesophageal Anastomotic Leaks with the use of a Surgical Adhesive- BioGlue. Trial ID: ISRCTN26729280. 2020. Status: Recruiting. Available from: <http://www.isrctn.com/ISRCTN26729280> [Accessed 11 August 2020].
- 908 ISRCTN Registry. Identifying potential medical causes of fatigue- pain and urgency in inflammatory bowel disease and optimising medical management of these causes. Trial ID: ISRCTN15380317. 2020. Status: Recruiting. Available from: <http://www.isrctn.com/ISRCTN15380317> [Accessed 11 August 2020].
- 909 ISRCTN Registry. The effect of the enhanced recovery after surgery (ERAS) program on length of stay among abdominal surgery patients at Mbarara Regional Referral Hospital- Uganda. Trial ID: ISRCTN62342149. 2020. Status: Completed. Available from: <http://www.isrctn.com/ISRCTN62342149> [Accessed 11 August 2020].

- 910 ISRCTN Registry. APPEAL: Antenatal preventative pelvic floor muscle exercise intervention led by midwives to reduce postnatal urinary incontinence. Trial ID: ISRCTN10833250. 2020. Status: Ongoing. Available from: <http://www.isrctn.com/ISRCTN10833250> [Accessed 11 August 2020].
- 911 ISRCTN Registry. A clinical trial using a pragmatic randomised design to test new interventions in prostate diseases. Trial ID: ISRCTN11095538. 2020. Status: Not Yet Recruiting. Available from: <http://www.isrctn.com/ISRCTN11095538> [Accessed 11 August 2020].
- 912 ISRCTN Registry. MODULATE: a study to evaluate the effectiveness of either amitriptyline- ondansetron- loperamide- or dietary intervention (the low FODMAP diet) against standard dietary advice for the treatment of diarrhoea in patients with stable ulcerative colitis. Trial ID: ISRCTN16086699. 2020. Status: Not Yet Recruiting. Available from: <http://www.isrctn.com/ISRCTN16086699> [Accessed 11 August 2020].
- 913 ISRCTN Registry. Development of a manual to guide care for people with incontinence to prevent or treat incontinence associated dermatitis (sore skin)- Part 1 and 2. Trial ID: ISRCTN26169429. 2020. Status: Not Yet Recruiting. Available from: <http://www.isrctn.com/ISRCTN26169429> [Accessed 11 August 2020].
- 914 UMIN Clinical Trials Registry (UMIN-CTR). Research on excretory and sexual function in patients with Marfan-Loeys-Dietz and Ehlers-Danlos syndromes. Trial ID: UMIN000040629. 2020. Status: Not Yet Recruiting. Available from: [https://upload.umin.ac.jp/cgi-open-bin/ctr\\_e/ctr\\_view.cgi?recptno=R000046370](https://upload.umin.ac.jp/cgi-open-bin/ctr_e/ctr_view.cgi?recptno=R000046370) [Accessed 11 August 2020].
- 915 UMIN Clinical Trials Registry (UMIN-CTR). The psychology of patients before and after implentation biofeedback therapy after stoma closure surgery -Suevey on patients with ultra low anterior resection and intersphincteric resection-. Trial ID: UMIN000040697. 2020. Status: Active- Not Recruiting. Available from: [https://upload.umin.ac.jp/cgi-open-bin/ctr\\_e/ctr\\_view.cgi?recptno=R000046458](https://upload.umin.ac.jp/cgi-open-bin/ctr_e/ctr_view.cgi?recptno=R000046458) [Accessed 11 August 2020].
- 916 Clinicaltrials.gov. Effects of Botox in Obstructed Defecation Syndrome. Trial ID: NCT02160288. 2014. Status: Other. Available from: <https://clinicaltrials.gov/ct2/show/record/NCT02160288> [Accessed 11 August 2020].
- 917 Clinicaltrials.gov. Short Term Outcomes of Robotic-assisted Intersphincteric Resection for Low Rectal Cancer (R-ISR). Trial ID: NCT03597126. 2018. Status: Not Yet Recruiting. Available from: <https://clinicaltrials.gov/ct2/show/record/NCT03597126> [Accessed 11 August 2020].
- 918 Clinicaltrials.gov. Assessment of Faecal Incontinence With MAPLe. Trial ID: NCT03969069. 2019. Status: Recruiting. Available from: <https://clinicaltrials.gov/ct2/show/record/NCT03969069> [Accessed 11 August 2020].
- 919 ISRCTN Registry. Missed obstetric anal sphincter injury following vaginal delivery in primiparous women. Trial ID: ISRCTN18006760. 2016. Status: Completed. Available from: <http://www.isrctn.com/ISRCTN18006760> [Accessed 11 August 2020].
- 920 Clinicaltrials.gov. Intra-anal Oxymetazoline in Healthy Adult Volunteers. Trial ID: NCT03529487. 2018. Status: Recruiting. Available from: <https://clinicaltrials.gov/ct2/show/record/NCT03529487> [Accessed 11 August 2020].
- 921 Clinicaltrials.gov. Effects of Single Dose Citalopram and Reboxetine on Urethral and Anal Closure Function on Healthy Female Subjects. Trial ID: NCT04097288. 2019. Status: Recruiting. Available from: <https://clinicaltrials.gov/ct2/show/record/NCT04097288> [Accessed 11 August 2020].
- 922 Clinicaltrials.gov. Evaluating the Impact of Automated Evaluation of Gastrointestinal Symptoms (AEGIS) on Clinical Outcomes (AEGIS). Trial ID: NCT02530216. 2015. Status: Completed. Available from: <https://clinicaltrials.gov/ct2/show/record/NCT02530216> [Accessed 11 August 2020].
- 923 Clinicaltrials.gov. Development of an Intelligent POWER Rehabilitation Cluster Machine and Its Clinical Testing and Assessment. Trial ID: NCT02685839. 2016. Status: Other. Available from: <https://clinicaltrials.gov/ct2/show/record/NCT02685839> [Accessed 11 August 2020].
- 924 Clinicaltrials.gov. Turkish Version of Childhood Bladder and Bowel Dysfunction Questionnaire. Trial ID: NCT03742570. 2018. Status: Completed. Available from: <https://clinicaltrials.gov/ct2/show/record/NCT03742570> [Accessed 11 August 2020].
- 925 Clinicaltrials.gov. Screening for Emotional- Behavioral and Developmental Disorders in Children With Functional Constipation. Trial ID: NCT03614000. 2018. Status: Recruiting. Available from: <https://clinicaltrials.gov/ct2/show/record/NCT03614000> [Accessed 11 August 2020].
- 926 Clinicaltrials.gov. Fecal Incontinence Type Assessment Scale. Trial ID: NCT04410822. 2020. Status: Recruiting. Available from: <https://clinicaltrials.gov/ct2/show/record/NCT04410822> [Accessed 11 August 2020].
- 927 ISRCTN Registry. Postal questionnaire data collection pilot study - APPEAL pilot study. Trial ID: ISRCTN99859966. 2018. Status: Completed. Available from: <http://www.isrctn.com/ISRCTN99859966> [Accessed 11 August 2020].
- 928 UMIN Clinical Trials Registry (UMIN-CTR). Validation of the Japanese Low Anterior Resection Syndrome(LARS) score as a self-administered questionnaire for postoperative bowel dysfunction after rectal cancer surgery: a



- multi-center prospective observational study. Trial ID: UMIN000035271. 2018. Status: Completed. Available from: [https://upload.umin.ac.jp/cgi-open-bin/ctr\\_e/ctr\\_view.cgi?recptno=R000040184](https://upload.umin.ac.jp/cgi-open-bin/ctr_e/ctr_view.cgi?recptno=R000040184) [Accessed 11 August 2020].
- 929 Clinicaltrials.gov. Faecal Incontinence iNtervention Study (FINS). Trial ID: NCT02355834. 2014. Status: Completed. Available from: <https://clinicaltrials.gov/ct2/show/record/NCT02355834> [Accessed 11 August 2020].
- 930 Clinicaltrials.gov. Transverse Coloplasty vs. Side-to-end Anastomosis Following Low Anterior Resection (LAR): CSAR Trial (CSAR). Trial ID: NCT03074461. 2017. Status: Other. Available from: <https://clinicaltrials.gov/ct2/show/record/NCT03074461> [Accessed 11 August 2020].
- 931 Clinicaltrials.gov. Evaluation of Ocoxin -Viusid in Metastatic Colorectal Adenocarcinoma. Trial ID: NCT03559543. 2018. Status: Recruiting. Available from: <https://clinicaltrials.gov/ct2/show/record/NCT03559543> [Accessed 11 August 2020].
- 932 Clinicaltrials.gov. Quality of Life Related to Digestive Symptoms After Cholecistectomy. Short Term Effects of a Low Fat Intake. Trial ID: NCT03883464. 2019. Status: Completed. Available from: <https://clinicaltrials.gov/ct2/show/record/NCT03883464> [Accessed 11 August 2020].
- 933 Clinicaltrials.gov. Lateral Episiotomy or Not in Vacuum Assisted Delivery in Non-parous Women (EVA). Trial ID: NCT02643108. 2015. Status: Recruiting. Available from: <https://clinicaltrials.gov/ct2/show/record/NCT02643108> [Accessed 11 August 2020].
- 934 Clinicaltrials.gov. Effect of Local Anesthesia on Postoperative Pain Following Sacrospinous Ligament Fixation. Trial ID: NCT02890199. 2016. Status: Other. Available from: <https://clinicaltrials.gov/ct2/show/record/NCT02890199> [Accessed 11 August 2020].
- 935 Clinicaltrials.gov. Clinical Research on Bowel Symptoms of Patient With Pelvic Organ Prolapse. Trial ID: NCT02731391. 2016. Status: Other. Available from: <https://clinicaltrials.gov/ct2/show/record/NCT02731391> [Accessed 11 August 2020].
- 936 Clinicaltrials.gov. Baclofen/Diazepam Supps for Treatment of Pelvic Floor Myalgia (BDS). Trial ID: NCT03427216. 2018. Status: Not Yet Recruiting. Available from: <https://clinicaltrials.gov/ct2/show/record/NCT03427216> [Accessed 11 August 2020].
- 937 Clinicaltrials.gov. Minimally Invasive Burch Colposuspension to Reduce Occult Stress Incontinence (MICRO). Trial ID: NCT03841513. 2019. Status: Recruiting. Available from: <https://clinicaltrials.gov/ct2/show/record/NCT03841513> [Accessed 11 August 2020].



## References

- 1 Brown SR, Wadhawan H, Nelson RL. Surgery for faecal incontinence in adults. *Cochrane Database of Systematic Reviews* 2013;**Issue 7**.
- 2 Perry S, Shaw C, McGrother C, Mathews RJ, Assassa RP, Dallosso H, *et al*. Prevalence of faecal incontinence in adults aged 40 years or more living in the community. *Gut* 2002;480-4.
- 3 Rockwood TH, Church JM, Fleshman JW, Kane RL, Mavrantonis C, Thorson AG, *et al*. Fecal incontinence quality of life scale. *Diseases of the Colon & Rectum* 2000;**43**:9-16.
- 4 Hart AL, Lomer M, Verjee A, Kemp K, Faiz O, Daly A, *et al*. What Are the Top 10 Research Questions in the Treatment of Inflammatory Bowel Disease? A Priority Setting Partnership with the James Lind Alliance. *Journal of Crohn's and Colitis* 2016;**11**:204-11.
- 5 Rowat A, Pollock A, St George B, Cowey E, Booth J, Lawrence M. Top 10 research priorities relating to stroke nursing: a rigorous approach to establish a national nurse-led research agenda. *Journal of Advanced Nursing* 2016;**72**:2831-43.
- 6 Whitehead WE, Wald A, Norton NJ. Priorities for treatment research from different professional perspectives. *Gastroenterology* 2004;**126**:S180-S5.
- 7 Whitehead WE, Bharucha AE, Rao SS, Hamilton FA, Kim SM. Researchers Identify Priorities for Fecal Incontinence: Survey of Scientists. *Gastroenterology* 2014;**146**:S714-S.
- 8 Fader M, Bliss D, Cottenden A, Moore K, Norton C. Continence products: Research priorities to improve the lives of people with urinary and/or fecal leakage. *Neurourology and Urodynamics* 2010;**29**:640-4.
- 9 Nasser M, Welch V, Tugwell P, Ueffing E, Doyle J, Waters E. Ensuring relevance for Cochrane reviews: evaluating processes and methods for prioritizing topics for Cochrane reviews. *Journal of Clinical Epidemiology* 2013;**66**:474-82.
- 10 Bourne AM, Johnston RV, Cyril S, Briggs AM, Clavisi O, Duque G, *et al*. Scoping review of priority setting of research topics for musculoskeletal conditions. *BMJ Open* 2018;**8**:e023962.
- 11 Kumar N, Haas DM, Grant S. Priority setting for the Cochrane Pregnancy and Childbirth Group review updates: a Delphi process. *American Journal of Obstetrics & Gynecology MFM* 2020;**2**.
- 12 Bhaumik S, Karimkhani C, Czaja C, Williams H, Rani M, Nasser M, *et al*. Identifying gaps in research prioritization: The global burden of neglected tropical diseases as reflected in the Cochrane database of systematic reviews. *Journal of Family Medicine and Primary Care* 2015;**4**:507-13.
- 13 Fadlallah R, El-Harakeh A, Bou-Karroum L, Lotfi T, El-Jardali F, Hishi L, *et al*. A common framework of steps and criteria for prioritizing topics for evidence syntheses: a systematic review. *Journal of Clinical Epidemiology* 2020;**120**:67-85.
- 14 Tong A, Synnot A, Crowe S, Hill S, Matus A, Scholes-Robertson N, *et al*. Reporting guideline for priority setting of health research (REPRISE). *BMC Medical Research Methodology* 2019;**19**:243.

- 15 NHS Centre for Reviews and Dissemination. Effectiveness Matters: The Database of Abstracts of Reviews of Effects (DARE). In: York TUo, ed., 2002.
- 16 Abrams P, Cardozo L, Wagg A, Wein A, (Eds). Incontinence: 6th International Consultation on Incontinence. Bristol, UK: ICI-ICS. International Continence Society, 2017.
- 17 Qualtrics. Qualtrics. Provo, Utah, USA, 2021.
- 18 EPPI-Reviewer Web. EPPI-Reviewer. London, UK: Evidence for Policy and Practice Information and Co-ordinating Centre, Social Science Research Unit at the Institute of Education, University of London., 2021.
- 19 Synnot AJ, Tong A, Bragge P, Lowe D, Nunn JS, O’Sullivan M, *et al.* Selecting, refining and identifying priority Cochrane Reviews in health communication and participation in partnership with consumers and other stakeholders. *Health Research Policy and Systems* 2019;**17**:45.
- 20 Woodley SJ, Lawrenson P, Boyle R, Cody JD, Mørkved S, Kernohan A, *et al.* Pelvic floor muscle training for preventing and treating urinary and faecal incontinence in antenatal and postnatal women. *Cochrane Database of Systematic Reviews* 2020.
- 21 Beeckman D, Van Damme N, Schoonhoven L, Van Lancker A, Kottner J, Beele H, *et al.* Interventions for preventing and treating incontinence-associated dermatitis in adults. *Cochrane Database of Systematic Reviews* 2016.
- 22 Coggrave M, Norton C, Cody JD. Management of faecal incontinence and constipation in adults with central neurological diseases. *Cochrane Database of Systematic Reviews* 2014.
- 23 Tou S, Brown SR, Nelson RL. Surgery for complete (full-thickness) rectal prolapse in adults. *Cochrane Database of Systematic Reviews* 2015.
- 24 Thaha MA, Abukar AA, Thin NN, Ramsanahie A, Knowles CH. Sacral nerve stimulation for faecal incontinence and constipation in adults. *Cochrane Database of Systematic Reviews* 2015.
- 25 Omar MI, Alexander CE. Drug treatment for faecal incontinence in adults. *Cochrane Database of Systematic Reviews* 2013.
- 26 Norton C, Cody JD. Biofeedback and/or sphincter exercises for the treatment of faecal incontinence in adults. *Cochrane Database of Systematic Reviews* 2012.
- 27 Brazzelli M, Griffiths PV, Cody JD, Tappin D. Behavioural and cognitive interventions with or without other treatments for the management of faecal incontinence in children. *Cochrane Database of Systematic Reviews* 2011.
- 28 Maeda Y, Laurberg S, Norton C. Perianal injectable bulking agents as treatment for faecal incontinence in adults. *Cochrane Database of Systematic Reviews* 2010.
- 29 Deutekom M, Dobben AC. Plugs for containing faecal incontinence. *Cochrane Database of Systematic Reviews* 2015.
- 30 Fader M, Cottenden AM, Getliffe K. Absorbent products for moderate-heavy urinary and/or faecal incontinence in women and men. *Cochrane Database of Systematic Reviews* 2008.

- 31 Hosker G, Cody JD, Norton CC. Electrical stimulation for faecal incontinence in adults. *Cochrane Database of Systematic Reviews* 2007.
- 32 Deng Y, Dong Y, Liu Y, Zhang Q, Guan X, Chen X, *et al.* A systematic review of clinical studies on electrical stimulation therapy for patients with neurogenic bowel dysfunction after spinal cord injury. *Medicine (Baltimore)* 2018;**97**:e12778.
- 33 Parittotokkaporn S, Varghese C, O'Grady G, Svirskis D, Subramanian S, O'Carroll SJ. Non-invasive neuromodulation for bowel, bladder and sexual restoration following spinal cord injury: a systematic review. *Clinical Neurology and Neurosurgery* 2020;**194**:105822.
- 34 Nelson MES, Orr M. Digital rectal stimulation as an intervention in persons with spinal cord injury and upper motor neuron neurogenic bowel. An evidenced-based systematic review of the literature. *The Journal of Spinal Cord Medicine* 2019:1-8.
- 35 Hagglund D. A systematic literature review of incontinence care for persons with dementia: the research evidence. *Journal of Clinical Nursing* 2010;**19**:303-12.
- 36 Wu YM, McInnes N, Leong Y. Pelvic floor muscle training versus watchful waiting and pelvic floor disorders in postpartum women: A systematic review and meta-analysis. *Female Pelvic Medicine & Reconstructive Surgery* 2018;**24**:142-9.
- 37 Harvey MA. Pelvic floor exercises during and after pregnancy: a systematic review of their role in preventing pelvic floor dysfunction. *Journal of Obstetrics and Gynaecology Canada* 2003;**25**:487-98.
- 38 Maris A, Devreese AM, D'Hoore A, Penninckx F, Staes F. Treatment options to improve anorectal function following rectal resection: a systematic review. *Colorectal Disease* 2013;**15**:e67-78.
- 39 Wojtyniak K, Szajewska H. Systematic review: probiotics for functional constipation in children. *European Journal of Pediatrics* 2017;**176**:1155-62.
- 40 Tabbers MM, Benninga MA. Constipation in children: fibre and probiotics. *BMJ Clinical Evidence* 2015;**10**:10.
- 41 Kenny KA, Skelly JM. Dietary fiber for constipation in older adults: a systematic review. *Clinical Effectiveness in Nursing* 2001;**5**:120-8.
- 42 Colavita K, Andy UU. Role of diet in fecal incontinence: A systematic review of the literature. *International Urogynecology Journal* 2016;**27**:1805-10.
- 43 Simillis C, Lal N, Pellino G, Baird D, Nikolaou S, Kontovounisios C, *et al.* A systematic review and network meta-analysis comparing treatments for faecal incontinence. *International Journal of Surgery* 2019;**66**:37-47.
- 44 Gurusamy KS, Marzouk D, Benziger H. A review of contemporary surgical alternatives to permanent colostomy. *International Journal of Surgery* 2005;**3**:193-205.
- 45 Thomas GP, Bradshaw E, Vaizey CJ. A review of sacral nerve stimulation for faecal incontinence following rectal surgery and radiotherapy. *Colorectal Disease* 2015;**17**:939-42.

- 46 Ramage L, Qiu S, Kontovounisios C, Tekkis P, Rasheed S, Tan E. A systematic review of sacral nerve stimulation for low anterior resection syndrome. *Colorectal Disease* 2015;**17**:762-71.
- 47 Ram E, Meyer R, Carter D, Gutman M, Rosin D, Horesh N. The efficacy of sacral neuromodulation in the treatment of low anterior resection syndrome: a systematic review and meta-analysis. *Techniques in Coloproctology* 2020;**24**:803-15.
- 48 Chodez M, Trilling B, Thuillier C, Boillot B, Barbois S, Faucheron JL. Results of sacral nerve neuromodulation for double incontinence in adults. *Techniques in Coloproctology* 2014;**18**:1147-51.
- 49 Iacona R, Ramage L, Malakounides G. Current state of neuromodulation for constipation and fecal incontinence in children: A systematic review. *European Journal of Pediatric Surgery* 2019;**29**:495-503.
- 50 Tan K, Wells CI, Dinning P, Bissett IP, O'Grady G. Placebo response rates in electrical nerve stimulation trials for fecal incontinence and constipation: A systematic review and meta-analysis. *Neuromodulation* 2019;**30**:30.
- 51 Koppen IJ, Benninga MA, Tabbers MM. Is there a role for pre-, pro- and synbiotics in the treatment of functional constipation in children? A systematic review. *Journal of Pediatric Gastroenterology and Nutrition* 2016;**63 Suppl 1**:S27-35.
- 52 Jin L, Deng L, Wu W, Wang Z, Shao W, Liu J. Systematic review and meta-analysis of the effect of probiotic supplementation on functional constipation in children. *Medicine (Baltimore)* 2018;**97**:e12174.
- 53 Ng RT, Lee WS, Ang HL, Teo KM, Yik YI, Lai NM. Transcutaneous electrical stimulation (TES) for treatment of constipation in children. *Cochrane Database of Systemic Reviews* 2016:CD010873.
- 54 Piccoli de Mello P, Eifer DA, Daniel de Mello E. Use of fibers in childhood constipation treatment: systematic review with meta-analysis [In Portuguese]. *Jornal de Pediatria* 2018;**94**:460-70.
- 55 Berger MY, Tabbers MM, Kurver MJ, Boluyt N, Benninga MA. Value of abdominal radiography, colonic transit time, and rectal ultrasound scanning in the diagnosis of idiopathic constipation in children: A systematic review. *Journal of Pediatrics* 2012;**161**:44-50.e2.
- 56 Harris RG, Neale EP, Ferreira I. When poorly conducted systematic reviews and meta-analyses can mislead: a critical appraisal and update of systematic reviews and meta-analyses examining the effects of probiotics in the treatment of functional constipation in children. *American Journal of Clinical Nutrition* 2019;**110**:177-95.
- 57 Petticrew M, Watt I, Brand M. What's the 'best buy' for treatment of constipation? Results of a systematic review of the efficacy and comparative efficacy of laxatives in the elderly. *British Journal of General Practice* 1999;**49**:387-93.
- 58 Shirran E, Brazzelli M. Absorbent products for the containment of urinary and/or faecal incontinence in adults. *Cochrane Database of Systematic Reviews* 2000:CD001406.
- 59 Yaping L. Barrier products in the treatment of incontinence-associated dermatitis. *Nursing Standard* 2016;**30**:59-67.

- 60 Pather P, Hines S, Kynoch K, Coyer F. Effectiveness of topical skin products in the treatment and prevention of incontinence-associated dermatitis: a systematic review. *JBIM Database of Systematic Reviews and Implementation Reports* 2017;**15**:1473-96.
- 61 Coyer F, Campbell J. Incontinence-associated dermatitis in the critically ill patient: an intensive care perspective. *Nursing in Critical Care* 2018;**23**:198-206.
- 62 Beeckman D, Schoonhoven L, Verhaeghe S, Heyneman A, Defloor T. Prevention and treatment of incontinence-associated dermatitis: Literature review. *Journal of Advanced Nursing* 2009;**65**:1141-54.
- 63 Gonzalez-Consuegra RV, Mora-Carvajal LH, Celis-Moreno JS, Matiz-Vera GD. Incontinence-associated dermatitis: a problem without definition, systematic review [In Spanish]. *Revista de la Facultad de Medicina* 2015;**63**:199-208.
- 64 Nusrat S, Gulick E, Levinthal D, Bielefeldt K. Anorectal dysfunction in Multiple Sclerosis: A systematic review. *ISRN Neurology* 2012;**2012**:376023.
- 65 Shamlivan T, Wyman J, Bliss DZ, Kane RL, Wilt TJ. Prevention of urinary and fecal incontinence in adults. *Evidence Report/Technology Assessment* 2007:1-379.
- 66 Chan DS, Delicata RJ. Meta-analysis of antegrade continence enema in adults with faecal incontinence and constipation. *British Journal of Surgery* 2016;**103**:322-7.
- 67 Soyer T. Prevention and management of complications in various antegrade enema procedures in children: A review of the literature. *Pediatric Surgery International* 2020;**36**:657-68.
- 68 Mohamed H, Wayne C, Weir A, Partridge EA, Langer JC, Nasr A. Tube cecostomy versus appendicostomy for antegrade enemas in the management of fecal incontinence in children: A systematic review. *Journal of Pediatric Surgery* 2020;**25**:25.
- 69 Patel AS, Saratzis A, Arasaradnam R, Harmston C. Use of Antegrade Continence Enema for the Treatment of Fecal Incontinence and Functional Constipation in Adults: A Systematic Review. *Diseases of the Colon & Rectum* 2015;**58**.
- 70 Riemsma R, Hagen S, Kirschner-Hermanns R, Norton C, Wijk H, Andersson KE, *et al.* Can incontinence be cured? A systematic review of cure rates. *BMC Medicine* 2017;**15**:63.
- 71 Tan E, Ngo NT, Darzi A, Shenouda M, Tekkis PP. Meta-analysis: sacral nerve stimulation versus conservative therapy in the treatment of faecal incontinence. *International Journal of Colorectal Disease* 2011;**26**:275-94.
- 72 Fragkos KC, Zarate-Lopez N, Frangos CC. What about clonidine for diarrhoea? A systematic review and meta-analysis of its effect in humans. *Therapeutic Advances in Gastroenterology* 2016;**9**:282-301.
- 73 Goodman C, Norton C, Buswell M, Russell B, Harari D, Harwood R, *et al.* Managing Faecal INcontinence in people with advanced dementia resident in Care Homes (FINCH) study: a realist synthesis of the evidence. *Health Technol Assessment* 2017;**21**:1-220.

- 74 Zhang Y, Leng M, Guo J, Duan J, Wang Z. The effectiveness of faecal collection devices in preventing incontinence-associated dermatitis in critically ill patients with faecal incontinence: A systematic review and meta-analysis. *Australian Critical Care* 2020;**34**:103-12.
- 75 Gray TG, Vickers H, Jha S, Jones GL, Brown SR, Radley SC. A systematic review of non-invasive modalities used to identify women with anal incontinence symptoms after childbirth. *International Urogynecology Journal* 2019;**30**:869-79.
- 76 Fallon A, Westaway J, Moloney C. A systematic review of psychometric evidence and expert opinion regarding the assessment of faecal incontinence in older community-dwelling adults. *International Journal of Evidence-Based Healthcare* 2008;**6**:225-59.
- 77 Yeap ZH, Simillis C, Qiu S, Ramage L, Kontovounisios C, Tekkis P. Diagnostic accuracy of anorectal manometry for fecal incontinence: a meta-analysis. *Acta Chirurgica Belgica* 2017;**117**:347-55.
- 78 D'Amico F, Wexner SD, Vaizey CJ, Gouynou C, Danese S, Peyrin-Biroulet L. Tools for fecal incontinence assessment: lessons for inflammatory bowel disease trials based on a systematic review. *United European Gastroenterology Journal* 2020;**8**:886-922.
- 79 Woodley SJ, Boyle R, Cody JD, Mørkved S, Hay-Smith EJC. Pelvic floor muscle training for prevention and treatment of urinary and faecal incontinence in antenatal and postnatal women. *Cochrane Database of Systematic Reviews* 2017.
- 80 Bliss DZ, Norton C, Vodusek DB. Raising awareness about fecal incontinence. *Neurourology and Urodynamics* 2010;**29**:612-5.
- 81 ClinicalTrials.gov. Physical Training and Health Education in the Prevention of Hospital-associated Functional Impairment in Elderly Patients. 2018.
- 82 Bharucha AE, Dunivan G, Goode PS, Lukacz ES, Markland AD, Matthews CA, *et al*. Epidemiology, Pathophysiology, and Classification of Fecal Incontinence: State of the Science Summary for the National Institute of Diabetes and Digestive and Kidney Diseases (NIDDK) Workshop. *Official journal of the American College of Gastroenterology* 2015;**110**.
- 83 Thomson K, Hillier-Brown F, Todd A, McNamara C, Huijts T, Bambra C. The effects of public health policies on health inequalities in high-income countries: an umbrella review. *BMC Public Health* 2018;**18**:869.
- 84 Becker JE, Krumholz HM, Ben-Josef G, Ross JS. Reporting of Results in ClinicalTrials.gov and High-Impact Journals. *JAMA* 2014;**311**:1063-5.
- 85 Hines P, Hiu Yu L, Guy RH, Brand A, Papaluca-Amati M. Scanning the horizon: a systematic literature review of methodologies. *BMJ Open* 2019;**9**:e026764.
- 86 Garnett K, Lickorish FA, Rocks SA, Prpich G, Rathe AA, Pollard SJT. Integrating horizon scanning and strategic risk prioritisation using a weight of evidence framework to inform policy decisions. *Science of The Total Environment* 2016;**560-561**:82-91.
- 87 Buswell M, Goodman C, Roe B, Russell B, Norton C, Harwood R, *et al*. What works to improve and manage fecal incontinence in care home residents living with dementia? A realist synthesis of the evidence. *Journal of the American Medical Directors Association* 2017;**18**:752-60.e1.



- 88 Clinicaltrials.gov. Evaluation of a Novel Electronic Transanal Irrigation System - Navina Smart. 2016.
- 89 Clinicaltrials.gov. Comparison of Transanal Irrigation and Glycerol Suppositories in Treatment of Low Anterior Resection Syndrome. 2019.
- 90 Clinicaltrials.gov. Effect of Treatment of Low Anterior Resection Syndrome After Rectal Cancer Surgery. 2017.
- 91 Clinicaltrials.gov. Low Anterior Resection Syndrome and Rectal Irrigation Study (LARRIS). 2015.
- 92 ISRCTN Registry. Efficiency of transanal irrigation and stimulation of a nerve of the ankle to improve symptoms and quality of life after radical surgery of rectal cancer. 2017.
- 93 Coggrave M, Norton C, Cody JD. Management of faecal incontinence and constipation in adults with central neurological diseases. Cochrane Database of Systematic Reviews 2014:CD002115.
- 94 Thai Clinical Trials Registry (TCTR). A Randomized- Double-Blind- Crossover- Placebo Controlled Trial of Bacillus clausii in Childhood Constipation. 2020.
- 95 Clinicaltrials.gov. A Study to Assess the Efficacy and Safety of Salix Probiotic Blend in Participants With Functional Gastrointestinal Disturbances. 2019.
- 96 Clinicaltrials.gov. Prebiotic Fructans Effect on 1-3 Years Constipated Children's Bowel Habits (CONSTICHILD). 2019.
- 97 Clinicaltrials.gov. Dried Plums (Prunes) vs. Polyethylene Glycol 4000 for Treatment of Functional Constipation in Children. 2018.
- 98 UMIN Clinical Trials Registry (UMIN-CTR). Effect of Lactobacillus reuteri DSM 17938 on functional constipation of infants. 2017.
- 99 Clinicaltrials.gov. Effects of Paediatric Tuina (Massage) on Constipation and Related Symptoms Among the Pre-school Aged Children. 2018.
- 100 Clinicaltrials.gov. Efficacy of Acupuncture as a Treatment for Faecal Incontinence. 2018.
- 101 Clinicaltrials.gov. Efficacy of Chinese Herbal Medicine Xiaojidaozhi Decoction in the Treatment of Childhood Constipation. 2017.
- 102 Clinicaltrials.gov. Stimulation for Colonic Motility. 2019.
- 103 Clinicaltrials.gov. Prove of Concept Study- to Evaluate the Efficacy- Safety- and Tolerability of IBEROGAST in the Treatment of Bowel Troubles in Patients With Parkinson's Disease (PHYTOPARK). 2016.
- 104 Clinicaltrials.gov. Acupuncture in Low Anterior Resection Syndrome Treatment (AcuLARS). 2018.
- 105 Clinical Research Information Service (CRIS). The effect of probiotics on functional constipation in children. 2019.

- 106 ISRCTN Registry. The effect of acupuncture for constipation after ischemic stroke. 2015.
- 107 UMIN Clinical Trials Registry (UMIN-CTR). The efficacy of Daikenchuto(TJ-100) on abdominal pain and abdominal fullness feeling in the patients with fecal incontinence., 2017.
- 108 Clinicaltrials.gov. Prebiotics for Spinal Cord Injury Patients With Bowel and Bladder Dysfunction. 2019.
- 109 Clinical Trials Registry - India (CTRI). comparison of Haritaki Draksha avaleha and Aargwadha phalmajja avaleha in the Treatment of Constipation in the age group of 5 to 10 years. 2018.
- 110 Clinical Trials Registry - India (CTRI). comparison of Haritaki pippali avaleha and Aargwadha phalamajja avaleha in the treatment of constipation in the age group of 3 to 6 years., 2019.
- 111 Yeung HY, Iyer P, Pryor J, Nicholson M. Dietary management of neurogenic bowel in adults with spinal cord injury: an integrative review of literature. *Disability and Rehabilitation* 2019;1-12.
- 112 Clinicaltrials.gov. Diet and Fecal Incontinence in Senior Women. 2018.
- 113 Clinicaltrials.gov. Physical Fitness- Body Composition and Frailty in Elderly People.Exercise Program Effectcs. EXERNET Elder 3.0 (EXERNETElder). 2018.
- 114 Clinicaltrials.gov. Prevalence of FODMAP Intolerance and JHS in FGID and Association With Microbiome- Dyssynergic Defecation and Dietary Intervention (PreDiMi). 2017.
- 115 Clinicaltrials.gov. The Effect of the Low Fodmap Diet in Children With Autism Spectrum Disorders. 2019.
- 116 Flanagan L, Roe B, Jack B, Shaw C, Williams KS, Chung A, *et al.* Factors with the management of incontinence and promotion of continence in older people in care homes. *Journal of Advanced Nursing* 2014;**70**:476-96.
- 117 Forte ML, Andrade KE, Butler M, Lowry AC, Bliss DZ, Slavin JL, *et al.* Treatments for Fecal Incontinence. . Rockville (MD): Agency for Healthcare Research and Quality (US) 2016:1-137.
- 118 Clinicaltrials.gov. Child Health Improvement Through Computer Automation of Constipation Management in Primary Care (CHICA-GI). 2015.
- 119 Clinicaltrials.gov. Community-Based Continence Promotion: Sustaining Healthy Aging in Place (SHAIP) Through Mind Over Matter (MOM) (SHAIP). 2017.
- 120 Clinicaltrials.gov. Individual Follow-up After Rectal Cancer - Focus on the Needs of the Patient (FURCA). 2016.
- 121 Clinicaltrials.gov. Physical Training and Health Education in Hospitalized Elderly. 2018.
- 122 Clinicaltrials.gov. Pilot: Mind Over Matter: Healthy Bowels- Healthy Bladder. 2015.
- 123 Clinicaltrials.gov. Use of the Leva Pelvic Digital Health System in Women With Fecal Incontinence. 2019.

- 124 Thomas GP, Dudding TC, Rahbour G, Nicholls RJ, Vaizey CJ. A review of posterior tibial nerve stimulation for faecal incontinence. *Colorectal Disease* 2013;**15**:519-26.
- 125 Lal N, Simillis C, Slessor A, Kontovounisios C, Rasheed S, Tekkis PP, *et al.* A systematic review of the literature reporting on randomised controlled trials comparing treatments for faecal incontinence in adults. *Acta Chirurgica Belgica* 2019;**119**:1-15.
- 126 Vonthein R, Heimerl T, Schwandner T, Ziegler A. Electrical stimulation and biofeedback for the treatment of fecal incontinence: a systematic review. *International Journal of Colorectal Disease* 2013;**28**:1567-77.
- 127 Sarveazad A, Babahajian A, Amini N, Shamseddin J, Yousefifard M. Posterior tibial nerve Stimulation in fecal incontinence: A systematic review and meta-analysis. *BCN* 2019;**10**:419-31.
- 128 Edenfield AL, Amundsen CL, Wu JM, Levin PJ, Siddiqui NY. Posterior tibial nerve stimulation for the treatment of fecal incontinence: a systematic evidence review. *Obstetrical & Gynecological Survey* 2015;**70**:329-41.
- 129 Arroyo Fernandez R, Avendano Coy J, Ando Lafuente S, Martin Correa MT, Ferri Morales A. Posterior tibial nerve stimulation in the treatment of fecal incontinence: A systematic review [In Spanish]. *Revista Española de Enfermedades Digestivas [The Spanish Journal of Gastroenterology]* 2018;**110**:577-88.
- 130 Ratto C, Litta F, Parello A, Donisi L, De Simone V, Zaccone G. Sacral nerve stimulation in faecal incontinence associated with an anal sphincter lesion: A systematic review. *Colorectal Disease* 2012;**14**:e297-304.
- 131 Forte ML, Andrade KE, Lowry AC, Butler M, Bliss DZ, Kane RL. Systematic review of surgical treatments for fecal incontinence. *Diseases of the Colon & Rectum* 2016;**59**:443-69.
- 132 Thin NN, Horrocks EJ, Hotouras A, Palit S, Thaha MA, Chan CL, *et al.* Systematic review of the clinical effectiveness of neuromodulation in the treatment of faecal incontinence. *British Journal of Surgery* 2013;**100**:1430-47.
- 133 Horrocks EJ, Thin N, Thaha MA, Taylor SJ, Norton C, Knowles CH. Systematic review of tibial nerve stimulation to treat faecal incontinence. *British Journal of Surgery* 2014;**101**:457-68.
- 134 Clinicaltrials.gov. BTL Emsella Chair Versus Sham for the Treatment of Fecal Incontinence. 2019.
- 135 Clinicaltrials.gov. Biofeedback Vs Electrical Stimulation in Treatment of Fecal Incontinence. 2018.
- 136 Australian New Zealand Clinical Trials Registry (ANZCTR). Tranabdominal Electric Stimulation in the treatment of Chronic Constipation in Children - TESCCO trial. 2020.
- 137 Clinicaltrials.gov. Pelvic Floor Consciousness (PFMCON). 2019.
- 138 ISRCTN Registry. Stimulation of pudendal nerve for management of adult faecal incontinence using key hole surgery. 2016.
- 139 Clinicaltrials.gov. Neuromodulation for Accidental Bowel Leakage (NOTABLE). 2018.

- 140 Clinicaltrials.gov. Optimising Treatments for Faecal Incontinence. 2016.
- 141 Clinicaltrials.gov. Tibial Nerve Stimulation in Combination With Biofeedback. 2016.
- 142 Clinicaltrials.gov. Bladder and TranscUTaneous Tibial Nerve Stimulation for nEurogenic Lower Urinary Tract Dysfunction (bTUNED) (bTUNED). 2020.
- 143 Australian New Zealand Clinical Trials Registry (ANZCTR). Percutaneous posterior tibial nerve stimulation (PTNS) and biofeedback for treating faecal incontinence. 2016.
- 144 Clinicaltrials.gov. Vaginal Electrical Stimulation for Postpartum Neuromuscular Recovery (VESPR). 2016.
- 145 Clinicaltrials.gov. Testing Diet Intervention Versus Non-Diet Intervention for Management of Bowel Symptoms in Rectal Cancer Survivors. 2019.
- 146 Australian New Zealand Clinical Trials Registry (ANZCTR). Comparison of low-chemical elimination diet with a low fermentable oligo- di- mono-saccharide and polyol (low FODMAP) diet for the management of functional gastrointestinal disorders (FGID). 2018.
- 147 Clinicaltrials.gov. Efficacy and Safety of Hou Gu Mi Xi in Patients With Spleen Qi Deficiency and Non-organic Gastrointestinal Disorders. 2016.
- 148 Thai Clinical Trials Registry (TCTR). Effects of skin care protocol on the severity of Incontinence Associated Dermatitis. 2020.
- 149 Clinicaltrials.gov. Impact of a Multicomponent Exercise Program on Functional Capacity in Frail Aged Participants With Cognitive Decline. 2017.
- 150 Clinicaltrials.gov. Neuromodulation Therapy for Fecal Incontinence. 2015.
- 151 Clinicaltrials.gov. Translumbosacral Neuromodulation for FI (TNT). 2019.
- 152 Norton C, Kamm MA. Anal sphincter biofeedback and pelvic floor exercises for faecal incontinence in adults - A systematic review. *Alimentary Pharmacology and Therapeutics* 2001;**15**:1147-54.
- 153 ECRI. Biofeedback for the treatment of fecal incontinence. United States: ECRI, 1998.
- 154 Enck P, van der Voort IR, Klosterhalfen S. Biofeedback therapy in fecal incontinence and constipation. *Neurogastroenterology and Motility* 2009;**21**:1133-41.
- 155 Palsson OS, Heymen S, Whitehead WE. Biofeedback treatment for functional anorectal disorders: a comprehensive efficacy review. *Applied Psychophysiology and Biofeedback* 2004;**29**:153-74.
- 156 Park SH, Kang CB, Jang SY, Kim BY. Effect of Kegel exercise to prevent urinary and fecal incontinence in antenatal and postnatal women: systematic review [In Korean]. *Journal of Korean Academy of Nursing* 2013;**43**:420-30.
- 157 UMIN Clinical Trials Registry (UMIN-CTR). A randomized controlled trial of transabdominal ultrasound biofeedback in postpartum pelvic floor muscle training. (Sango-PFMT Trial). 2016.

- 158 Clinicaltrials.gov. Fecal Incontinence Treatment (FIT) Study. 2019.
- 159 Clinicaltrials.gov. Biofeedback Training Fecal Incontinence in Children. 2018.
- 160 Australian New Zealand Clinical Trials Registry (ANZCTR). Pelvic floor rehabilitation to improve bowel symptoms- pelvic floor function and quality of life among patients with rectal cancer. 2020.
- 161 Clinicaltrials.gov. Pelvic Floor Muscles Training After Radical Prostatectomy., 2018.
- 162 Clinicaltrials.gov. Exercise Training for Rectal Cancer Patients. 2015.
- 163 Australian New Zealand Clinical Trials Registry (ANZCTR). The effect of antenatal pelvic floor muscle exercises on female sexual function: A randomised controlled trial. 2017.
- 164 Clinicaltrials.gov. Home Versus Office Biofeedback Therapy for Fecal Incontinence. 2015.
- 165 Clinicaltrials.gov. Physical Exercise for Colorectal Cancer Patients After Transanal Total Mesorectal Excision. 2017.
- 166 Clinicaltrials.gov. Manual Fascial Manipulation in Pregnant Women. 2018.
- 167 Clinicaltrials.gov. Physical Therapy for Anal Incontinence. 2017.
- 168 ISRCTN Registry. Use of physiotherapy to improve bowel function after rectal cancer surgery. 2017.
- 169 Freeman KA, Riley A, Duke DC, Fu R. Systematic review and meta-analysis of behavioral interventions for fecal incontinence with constipation. *Journal of Pediatric Psychology* 2014;**39**:887-902.
- 170 Clinicaltrials.gov. Treatment of Spinal Cord Injury Patients for Neurogenic Bladder: Anticholinergic Agent vs. Mirabegron (SCIMYR). 2018.
- 171 Bray L, Sanders C. An evidence-based review of the use of transanal irrigation in children and young people with neurogenic bowel. *Spinal Cord* 2013;**51**:88-93.
- 172 Tod AM, Stringer E, Lavery C, Dean J, Brown J. Rectal irrigation in the management of functional bowel disorders: a review. *British Journal of Nursing* 2007;**16**:858-64.
- 173 Christensen P, Krogh K. Transanal irrigation for disordered defecation: a systematic review. *Scandinavian Journal of Gastroenterology* 2010;**45**:517-27.
- 174 Clinicaltrials.gov. An Open- Qualitative- Prospective- Multicenter Trial of a Novel Transanal Irrigation System in Spinal Cord Injured Patients., 2016.
- 175 Clinicaltrials.gov. Retrograde Colonic Irrigation to Manage Spina Bifida Functional Digestive Sequelae: a Multicenter- Prospective- Randomized Controlled Trial (IRRICO). 2015.
- 176 Clinicaltrials.gov. Encopresis & MIE (DoD #2). 2017.

- 177 Clinicaltrials.gov. Electrical Stimulation of Abdominal Muscles for Bowel Management in People With Spinal Cord Injury (BOWMAN). 2020.
- 178 Clinicaltrials.gov. Transcutaneous and Epidural Spinal Stimulation for Enabling Motor Function in Humans With Motor Complete Paraplegia (TransEpi). 2019.
- 179 ISRCTN Registry. SUMS: Standing up in people with multiple sclerosis. 2015.
- 180 Clinicaltrials.gov. Effects of Osteopathic Manipulative Treatment in People With Neurogenic Bowel Dysfunction. 2019.
- 181 ISRCTN Registry. Optimising pelvic floor muscle training to improve quality of life outcomes for individuals with progressive multiple sclerosis and incontinence. 2015.
- 182 Clinicaltrials.gov. Osteopathic Manipulative Treatments and Neurogenic Bowel Dysfunction in Patients With Spinal Cord Injuries., 2020.
- 183 Clinicaltrials.gov. Recovery of Bladder and Sexual Function After Human Spinal Cord Injury. 2021.
- 184 Clinicaltrials.gov. Feasibility Study of the Use of the geko™ Device for Faecal Incontinence in Older People Living at Home or in Care Homes. 2016.
- 185 Clinicaltrials.gov. NeuroRegen Scaffold Combined With Stem Cells for Chronic Spinal Cord Injury Repair. 2016.
- 186 Clinicaltrials.gov. Improving Bowel Function and Quality of Life After Spinal Cord Injury. 2019.
- 187 Clinicaltrials.gov. Transplantation of Autologous Bone Marrow or Leukapheresis-Derived Stem Cells for Treatment of Spinal Cord Injury. 2016.
- 188 Jarrett ME, Mowatt G, Glazener CM, Fraser C, Nicholls RJ, Grant AM, *et al.* Systematic review of sacral nerve stimulation for faecal incontinence and constipation. *British Journal of Surgery* 2004;**91**:1559-69.
- 189 Emmett CD, Close HJ, Yiannakou Y, Mason JM. Trans-anal irrigation therapy to treat adult chronic functional constipation: systematic review and meta-analysis. *BMC Gastroenterology* 2015;**15**:139.
- 190 Clinicaltrials.gov. Orally Administered ENT-01 for Parkinson's Disease-Related Constipation (KARMET) (KARMET). 2018.
- 191 Clinicaltrials.gov. Evaluation of Safety and Tolerability of ENT-01 for the Treatment of Parkinson's Disease Related Constipation (RASMET). 2017.
- 192 UMIN Clinical Trials Registry (UMIN-CTR). Effectiveness of Elobixibat and Linaclotide in neurogenic bowel dysfunction due to spinal cord injury. 2019.
- 193 Clinicaltrials.gov. Linaclotide Safety and Efficacy- Functional Constipation- in Pediatric Participants 6 to 17 Years of Age. 2019.



- 194 Clinicaltrials.gov. Linaclotide Safety and Efficacy in 2 to 5-Year-Old Participants With Functional Constipation. 2019.
- 195 EU Clinical Trials Register. A Multicentre- Long-term Safety- Efficacy and Pharmacokinetics Study of Lubiprostone in Paediatric Subjects Aged 6 years to <18 years with Functional Constipation. 2016.
- 196 EU Clinical Trials Register. A Multicentre- Randomised- Placebo-controlled- Double-blinded Study of the Efficacy- Safety- and Pharmacokinetics of Lubiprostone in Paediatric Subjects Aged 6 Years to < 18 Years with Functional Constipation. 2015.
- 197 EU Clinical Trials Register. A Phase 3- Multicenter- Randomized- Double-blind- Placebo-controlled- Parallel-group- Safety and Efficacy Study of Linaclotide Administered Orally to Children- Ages 6 to 17 Years- With Functional Constipation (FC); Linaclotide Safety and Efficacy Functional Constipation (FC)- in Pediatric Participants- 6 to 17 Yea. 2020.
- 198 Clinicaltrials.gov. A Safety and Efficacy Study of a Range of Linaclotide Doses Administered Orally to Children Ages 6-17 Years Who Fulfill Modified Rome III Criteria for Child/Adolescent Functional Constipation (FC). 2015.
- 199 Clinicaltrials.gov. A Safety and Efficacy Evaluation of BLI400 Laxative in Constipated Adolescent Subjects. 2015.
- 200 ISRCTN Registry. A multicentre pragmatic clinical investigation to assess the efficacy of TransiCap MRI marker devices in magnetic resonance imaging when used to determine whole gut transit time- and inform treatment selection in paediatric constipation. 2020.
- 201 Clinicaltrials.gov. Defecation Function and Quality of Life in the Patients Treated With Surgery for Slow Transit Constipation. 2019.
- 202 Australian New Zealand Clinical Trials Registry (ANZCTR). Optimising balloon expulsion testing and sensory testing in patients with faecal incontinence and chronic constipation. 2019.
- 203 ISRCTN Registry. Waiting list controlled trial of surgical treatment for adults with chronic constipation. 2015.
- 204 Clinical Trials Registry - India (CTRI). To compare the effectiveness of two types of laxatives namely Polyethylene Glycol 3350 vs. Lactulose for treatment of constipation in Indian Children. 2018.
- 205 Clinical Trials Registry - India (CTRI). Trial of combination of polyethylene glycol with or without sodium picosulphate for treatment of constipation in children. 2018.
- 206 Brazzelli M, Shirran E, Vale L. Absorbent products for containing urinary and/or fecal incontinence in adults. *Journal of Wound Ostomy and Continence Nursing* 2002;**29**:45-54.
- 207 Australian New Zealand Clinical Trials Registry (ANZCTR). Efficacy of Incontinence Associated Dermatitis Interventions for Critically Ill Patients in Intensive Care: the Distinct Pilot Randomised Control Trial., 2017.
- 208 Clinicaltrials.gov. Treatment of Incontinence Associated Dermatitis - Automated (TRIAD-A). 2017.

- 209 ISRCTN Registry. Development of a manual to guide care for people with incontinence to prevent or treat incontinence associated dermatitis (sore skin)- part 3. 2021.
- 210 Australian New Zealand Clinical Trials Registry (ANZCTR). An investigation of the clinical utility of the electronic toilet top bidet for use with Australian nursing home residents and staff., 2015.
- 211 Chaichanavichkij P, Vollebregt PF, Scott SM, Knowles CH. Botulinum toxin type A for the treatment of dyssynergic defaecation in adults: a systematic review. *Colorectal Disease* 2020;**Epub ahead of print**.
- 212 Clinicaltrials.gov. Effect and Tolerance of Botulinum A Toxin Rectal Injections on Fecal Incontinence (FI\_TOXIN). 2015.
- 213 Australian New Zealand Clinical Trials Registry (ANZCTR). Does the type of enema administration affect time to complete bowel care in people with recent Spinal Cord Injury? , 2018.
- 214 Clinicaltrials.gov. A Within Subjects Comparison of Two Antegrade Flushing Regimens in Children. 2016.
- 215 Bach FL, Sairally BZF, Latthe P. Effect of oestrogen therapy on faecal incontinence in postmenopausal women: a systematic review. *International Urogynecology Journal* 2020;**31**:1289-97.
- 216 Clinicaltrials.gov. A Study of Colesevelam in Fecal Incontinence. 2015.
- 217 Clinicaltrials.gov. Does Single Dose Imipramine Affect the Opening Pressure of the Urethral and Anal Sphincter? , 2017.
- 218 Clinicaltrials.gov. An Interdisciplinary Approach to the Treatment of Encopresis in Children With Autism Spectrum Disorders. 2015.
- 219 Adelaide Health Technology Assessment. Placement of artificial bowel sphincters in the management of faecal incontinence. Canberra, Australia: Medical Services Advisory Committee, Department of Health and Ageing, 2003.
- 220 Mundy L, Merlin TL, Maddern GJ, Hiller JE. Systematic review of safety and effectiveness of an artificial bowel sphincter for faecal incontinence. *British Journal of Surgery* 2004;**91**:665-72.
- 221 Clinicaltrials.gov. Treatment of Anal Incontinence With Intersphincteric Implants. 2017.
- 222 Lian W, Zheng Y, Huang H, Chen L, Cao B. Effects of bariatric surgery on pelvic floor disorders in obese women: a meta-analysis. *Archives of Gynecology and Obstetrics* 2017;**296**:181-9.
- 223 Poylin V, Serrot FJ, Madoff RD, Ikramuddin S, Mellgren A, Lowry AC, *et al*. Obesity and bariatric surgery: a systematic review of associations with defecatory dysfunction. *Colorectal Disease* 2011;**13**:e92-103.
- 224 Montenegro M, Slongo H, Juliato CRT, Minassian VA, Tavakkoli A, Brito LGO. The impact of bariatric surgery on pelvic floor dysfunction: A systematic review. *The Journal of Minimally Invasive Gynecology* 2019;**26**:816-25.

- 225 Chapman AE, Geerdes B, Hewett P, Young J, Evers T, Kiroff G, *et al.* Systematic review of dynamic graciloplasty in the treatment of faecal incontinence. *British Journal of Surgery* 2002;**89**:138-53.
- 226 Medical Services Advisory Committee. Intersphincteric injection of silicone biomaterial for severe passive faecal incontinence. Australia: Medical Services Advisory Committee (MSAC), 2006.
- 227 Hong KD, Kim JS, Ji WB, Um JW. Midterm outcomes of injectable bulking agents for fecal incontinence: a systematic review and meta-analysis. *Techniques in Coloproctology* 2017;**21**:203-10.
- 228 Maeda Y, Laurberg S, Norton C. Perianal injectable bulking agents as treatment for faecal incontinence in adults. *Cochrane Database of Systemic Reviews* 2013:CD007959.
- 229 Hussain ZI, Lim M, Stojkovic SG. Systematic review of perianal implants in the treatment of faecal incontinence. *British Journal of Surgery* 2011;**98**:1526-36.
- 230 Luo C, Samaranayake CB, Plank LD, Bissett IP. Systematic review on the efficacy and safety of injectable bulking agents for passive faecal incontinence. *Colorectal Disease* 2010;**12**:296-303.
- 231 Winkler R. Injectable bulking agents for faecal incontinence: systematic review [In German]. *Ludwig Boltzmann Institut Health Technology Assessment* 2015;**87**.
- 232 Clinicaltrials.gov. Bulking Agent Versus Electrostimulation Therapy in Anal Incontinence (Bulking). 2018.
- 233 Clinicaltrials.gov. Fat Grafting Technique for Fecal Incontinence. 2019.
- 234 ISRCTN Registry. SaFaRI: Sacral nerve stimulation versus the FENIX TM magnetic sphincter augmentation for adult faecal incontinence: a randomised Investigation. 2015.
- 235 Hong KD, Dasilva G, Kalaskar SN, Chong Y, Wexner SD. Long-term outcomes of artificial bowel sphincter for fecal incontinence: a systematic review and meta-analysis. *Journal of American College of Surgeons* 2013;**217**:718-25.
- 236 Clinicaltrials.gov. PRP Injection Into Anal Sphincters for Fecal Incontinence. 2019.
- 237 Hocevar B, Gray M. Intestinal diversion (colostomy or ileostomy) in patients with severe bowel dysfunction following spinal cord injury. *Journal of Wound, Ostomy and Continence Nursing* 2008;**35**:159-66.
- 238 Clinicaltrials.gov. Transcutaneous Posterior Nerve Stimulation in Treatment of Fecal Incontinence. 2017.
- 239 Clinicaltrials.gov. Radiofrequency in Anal Incontinence: Randomized Clinical Trials. 2015.
- 240 Emile SH, Elfeki H, Shalaby M, Sakr A, Sileri P, Wexner SD. Outcome of laparoscopic ventral mesh rectopexy for full-thickness external rectal prolapse: a systematic review, meta-analysis, and meta-regression analysis of the predictors for recurrence. *Surgical Endoscopy* 2019;**33**:2444-55.
- 241 Grimes CL, Schimpf MO, Wieslander CK, Sleemi A, Doyle P, Wu YM, *et al.* Surgical interventions for posterior compartment prolapse and obstructed defecation symptoms: A

- systematic review with clinical practice recommendations. *International Urogynecology Journal* 2019;**30**:1433-54.
- 242 Emile SH, Elfeki HA, Youssef M, Farid M, Wexner SD. Abdominal rectopexy for the treatment of internal rectal prolapse: a systematic review and meta-analysis. *Colorectal Disease* 2017;**19**:O13-O24.
- 243 Emile SH, Elfeki H, Shalaby M, Sakr A, Sileri P, Wexner SD. Perineal resectional procedures for the treatment of complete rectal prolapse: A systematic review of the literature. *International Journal of Surgery* 2017;**46**:146-54.
- 244 Albayati S, Chen P, Morgan MJ, Toh JWT. Robotic vs. laparoscopic ventral mesh rectopexy for external rectal prolapse and rectal intussusception: a systematic review. *Techniques in Coloproctology* 2019;**23**:529-35.
- 245 Samaranyake CB, Luo C, Plank AW, Merrie AE, Plank LD, Bissett IP. Systematic review on ventral rectopexy for rectal prolapse and intussusception. *Colorectal Disease* 2010;**12**:504-12.
- 246 Clinicaltrials.gov. Laparoscopic Ventral Mesh Rectopexy Combined With or Without Stapled Trans-anal Rectal Resection for Obstructed Defecation Syndrome. 2017.
- 247 Mirbagheri N, Sivakumaran Y, Nassar N, Gladman MA. Systematic review of the impact of sacral neuromodulation on clinical symptoms and gastrointestinal physiology. *ANZ Journal of Surgery* 2016;**86**:232-6.
- 248 Zhu Y, Wu G, Zhang J, Yan W, Han M, Zhang H, *et al.* Meta-analysis of sacral nerve stimulation for fecal incontinence [In Chinese]. *Zhonghua Wei Chang Wai Ke Za Zhi* 2017;**20**:1417-21.
- 249 Clinicaltrials.gov. Effectiveness of Sacral Neuromodulation in Low Anterior Resection Syndrome (SANLARS). 2018.
- 250 Clinicaltrials.gov. Percutaneous Nerve Evaluation With Fluoroscopy Versus Without. 2016.
- 251 ISRCTN Registry. Reducing radiation exposure during InterStim lead placement. 2015.
- 252 Clinicaltrials.gov. Sacral Nerve Stimulation for Faecal Incontinence - Placebo or Clinical Effective (SNS). 2016.
- 253 Clinicaltrials.gov. Sacral Nerve Stimulation in Treating Low Anterior Resection Syndrome or Fecal Incontinence in Patients With Locally Advanced Rectal Cancer or Other Pelvic Cancer- the RESTORE Study. 2019.
- 254 ISRCTN Registry. Subsensory sacral neuromodulation for incontinence. 2017.
- 255 Australian New Zealand Clinical Trials Registry (ANZCTR). In vivo characterisation of pressure wave propagation in the rectosigmoid region as a target for neuromodulation for faecal incontinence. 2015.
- 256 Clinicaltrials.gov. Sacral Neuromodulation as Treatment for Fecal Incontinence (LLLT-FI). 2019.

- 257 Tan EK, Jacovides M, Khullar V, Teoh TG, Fernando RJ, Tekkis PP. A cost-effectiveness analysis of delayed sphincteroplasty for anal sphincter injury. *Colorectal Disease* 2008;**10**:653-62.
- 258 Clinicaltrials.gov. Transperineal Repair of Primary Obstetric Rectovaginal Fistulas. 2018.
- 259 Glasgow SC, Lowry AC. Long-term outcomes of anal sphincter repair for fecal incontinence: a systematic review. *Diseases of the Colon & Rectum* 2012;**55**:482-90.
- 260 Clinicaltrials.gov. High-need Community Older Adults Care Delivery Model (HCOACDM). 2019.
- 261 Ousey K, Gillibrand W, Lui S. Effective management of acute faecal incontinence in hospital: review of continence management systems. *Frontline Gastroenterology* 2010;**1**:94-7.
- 262 Roe B, Flanagan L, Jack B, Barrett J, Chung A, Shaw C, *et al.* Systematic review of the management of incontinence and promotion of continence in older people in care homes: descriptive studies with urinary incontinence as primary focus. *Journal of Advanced Nursing* 2011;**67**:228-50.
- 263 Buono K, Dave-Heliker B. Mechanical inserts for the treatment of faecal incontinence: A systematic review. *Arab Journal of Urology* 2019;**17**:69-76.
- 264 Australian New Zealand Clinical Trials Registry (ANZCTR). Comparing the use of a containment product for the treatment of faecal incontinence (IFI) in stroke survivors versus standard faecal incontinence (FI) care in a rehabilitation setting., 2017.
- 265 Clinicaltrials.gov. Safety and Effectiveness Evaluation of the ForConti Contix Fecal Incontinence Management System (FIMS). 2019.
- 266 Clinicaltrials.gov. Safety and Effectiveness Evaluation of the ForConti Fecal Management System - Pilot Study. 2015.
- 267 Clinical Trials Registry - India (CTRI). A study to evaluate the clinical and health economic effectiveness of a novel device for faecal management in bedridden patients with little to no bowel control. 2016.
- 268 Clinicaltrials.gov. The Use of an 'Anal-Tape' in Patients With Fecal Incontinence. 2016.
- 269 Clinical Trials Registry - India (CTRI). A study for evaluation of caregiver acceptability of a device for stool management in bed ridden patients. 2017.
- 270 Clinicaltrials.gov. A Clinical Evaluation of the Eclipse System- a Vaginal Bowel Control (VBC) Therapy for Fecal Incontinence in Women (LIBERATE). 2015.
- 271 Clinicaltrials.gov. Pursuit: Real World Use of the Eclipse System (PURSUIT). 2019.
- 272 Clinicaltrials.gov. Incontinence Management System ICU Field Evaluation. 2018.
- 273 Clinicaltrials.gov. Comparison of Anorectal Manometry and 3D Manometry in Diagnosis of Functional Disorders in Children. 2018.
- 274 Clinicaltrials.gov. Studies in Patients With Defecatory Disorders. 2017.

275 Clinicaltrials.gov. Fecal Microbial Transplantation for the Treatment of Fecal Incontinence in Women (FMT for FI). 2020.
